# Supplementary material
Source: PubMed Central journal article supplement (PMC4112379)

# PGC\_SCZ52.reg1

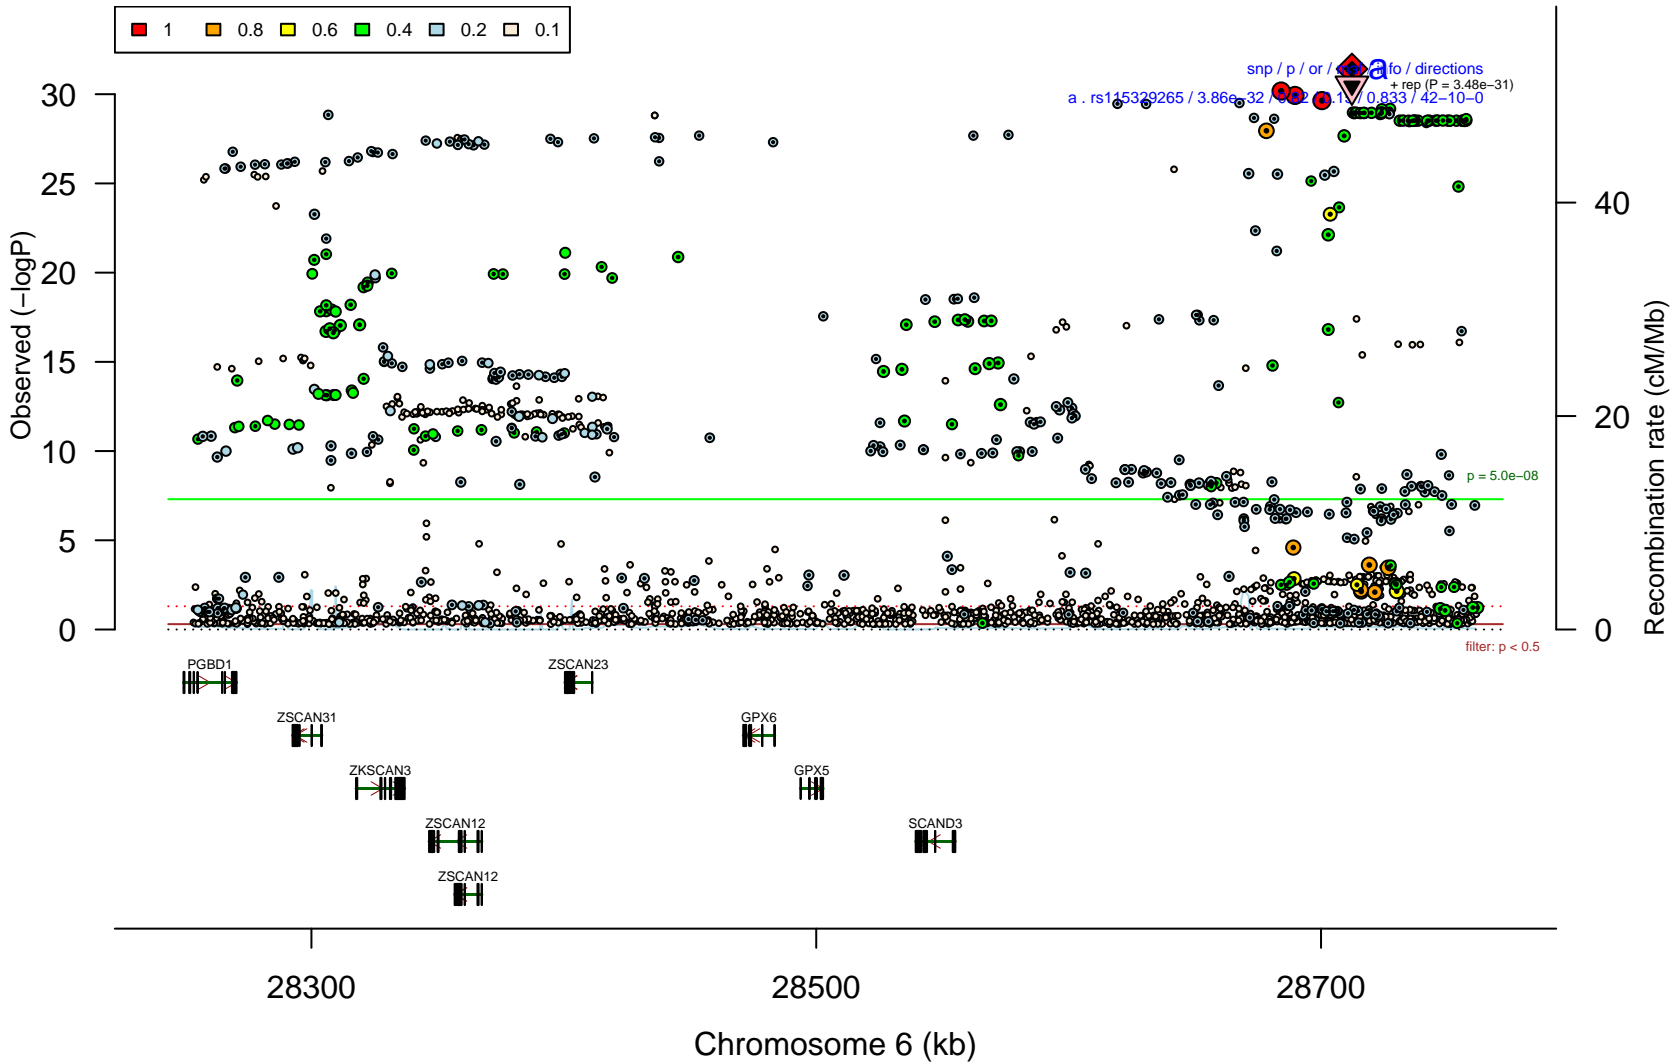

# PGC\_SCZ52.reg2

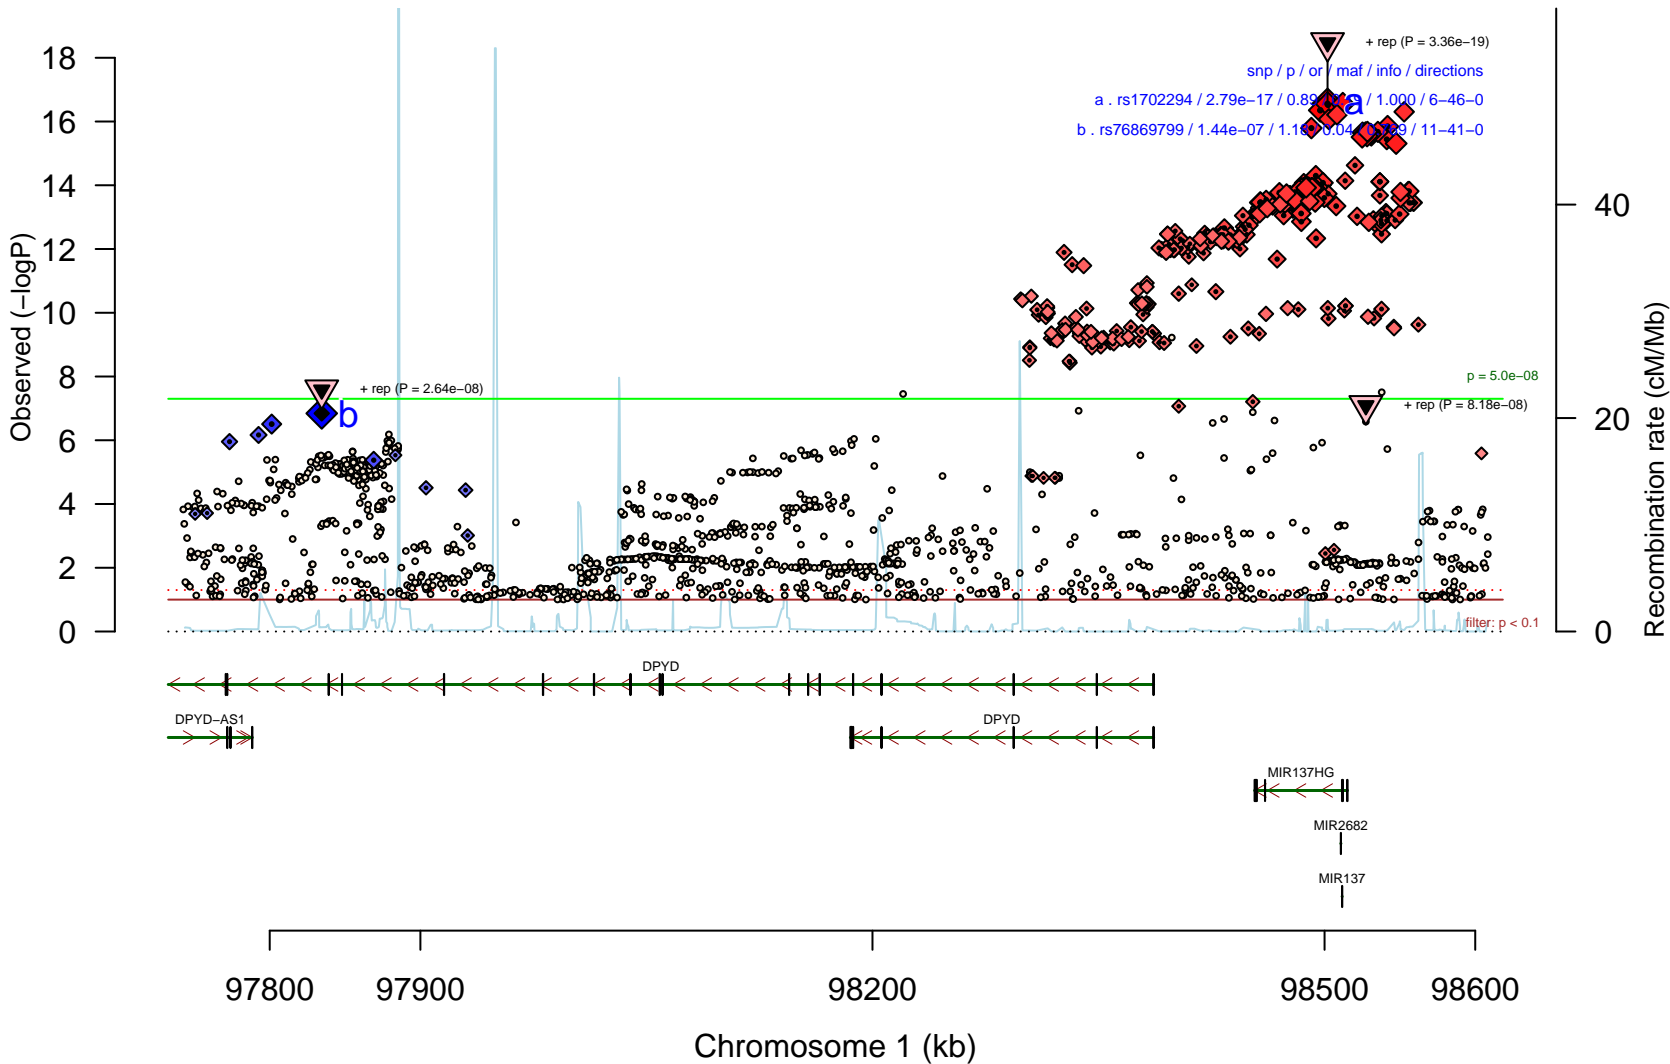

# PGC\_SCZ52.reg3

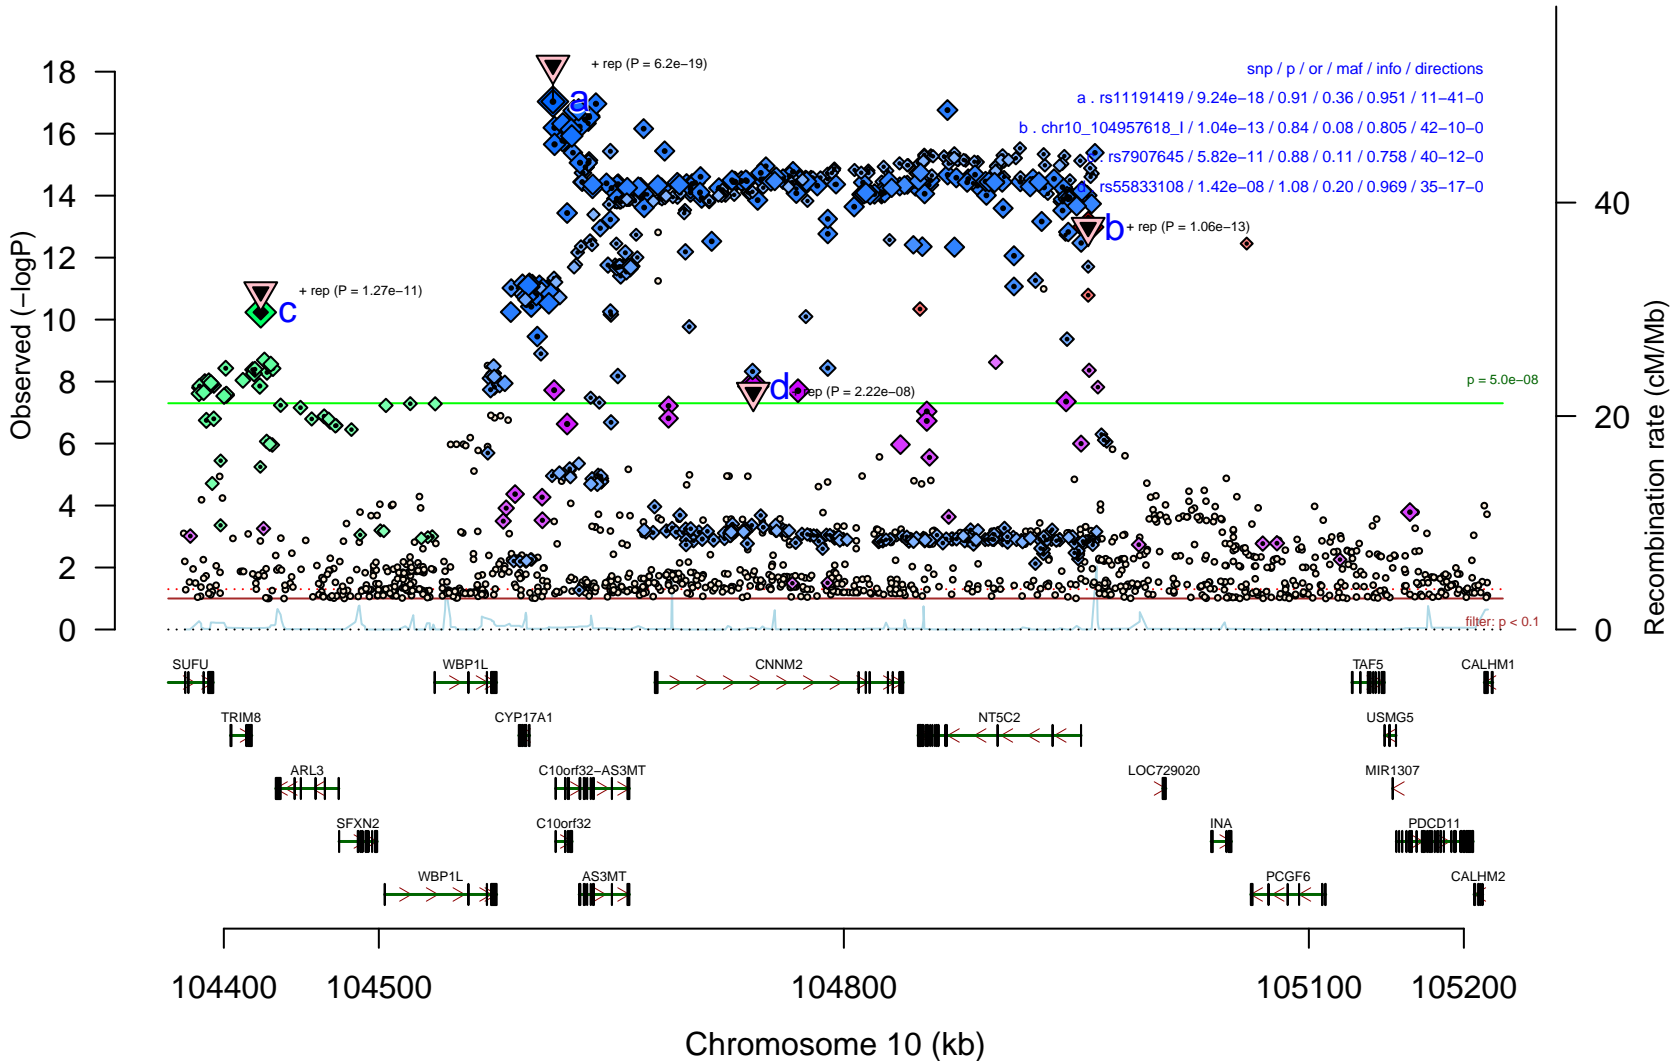

# PGC\_SCZ52.reg4

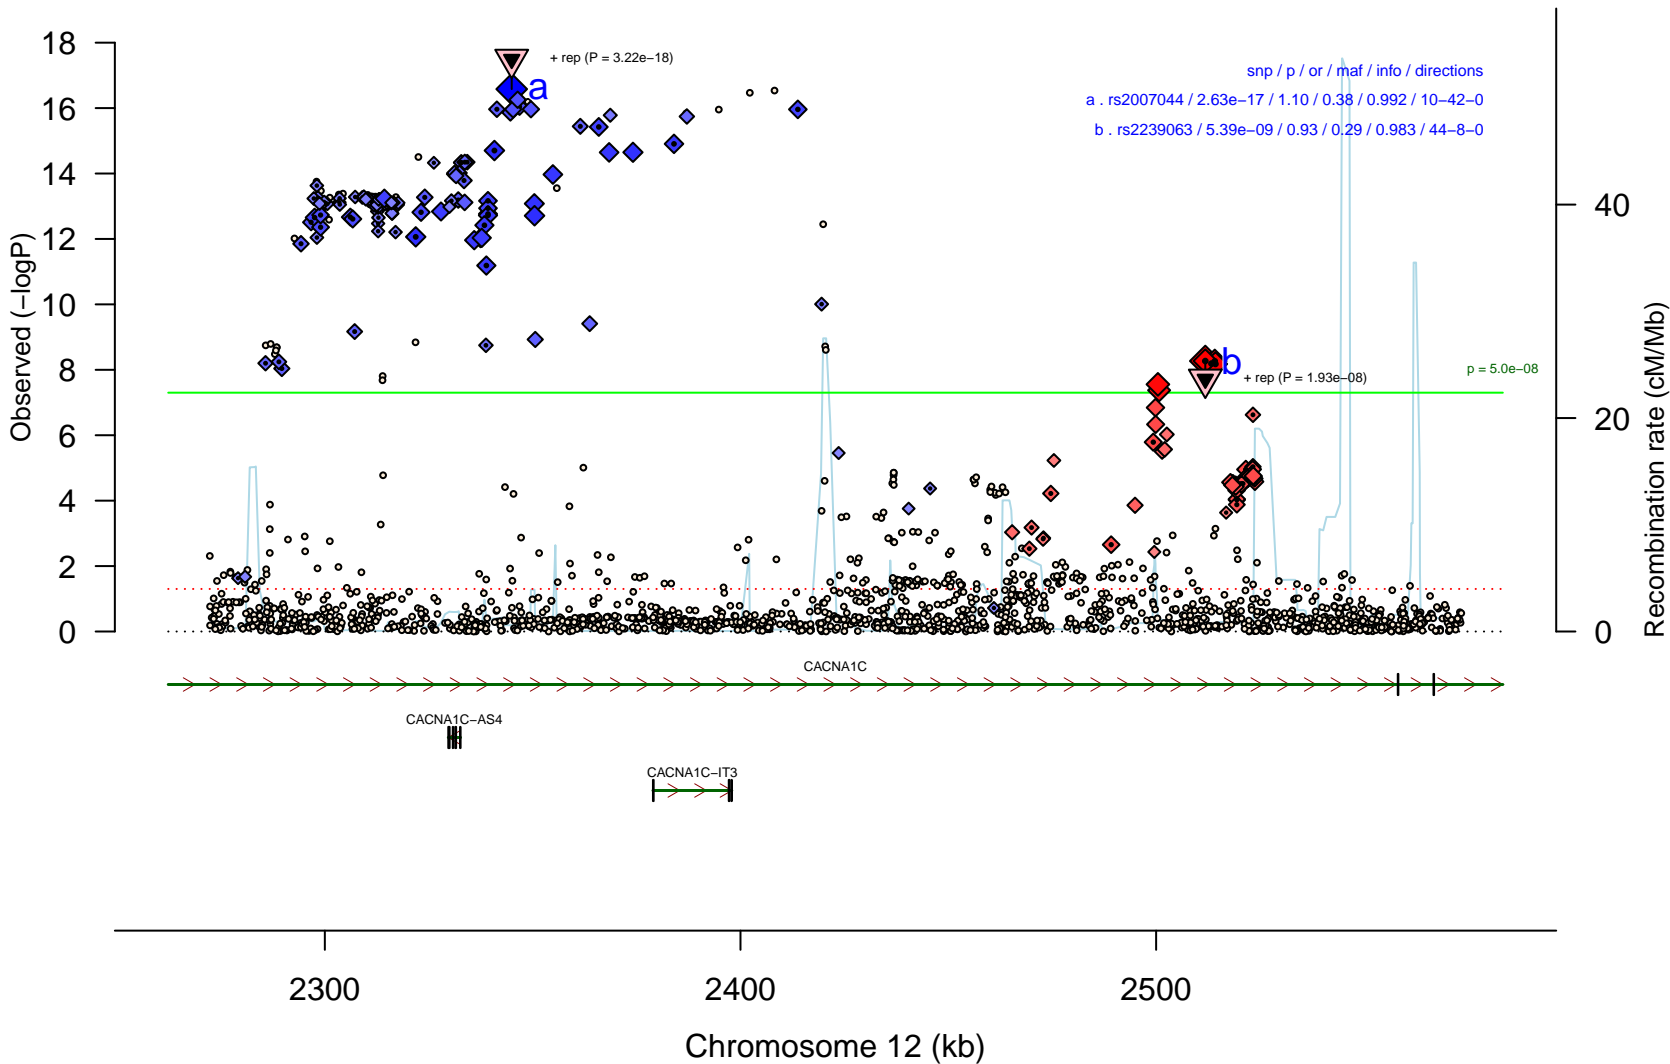

# PGC\_SCZ52.reg5

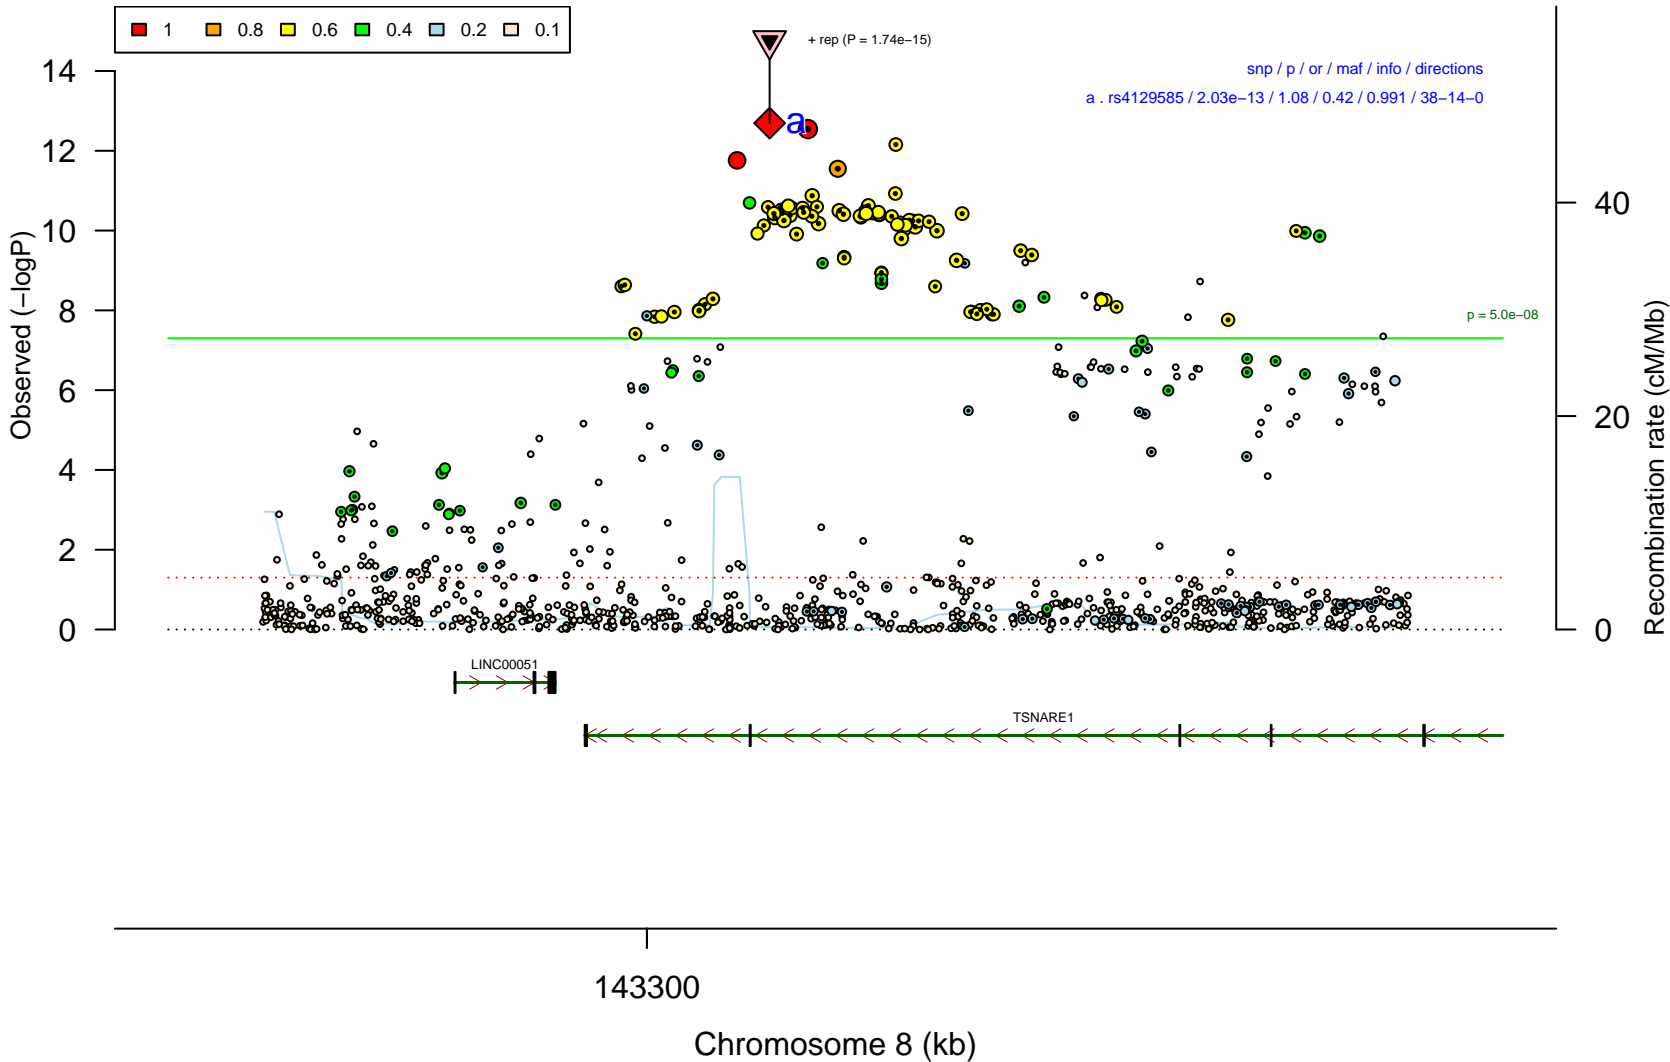

# PGC\_SCZ52.reg6

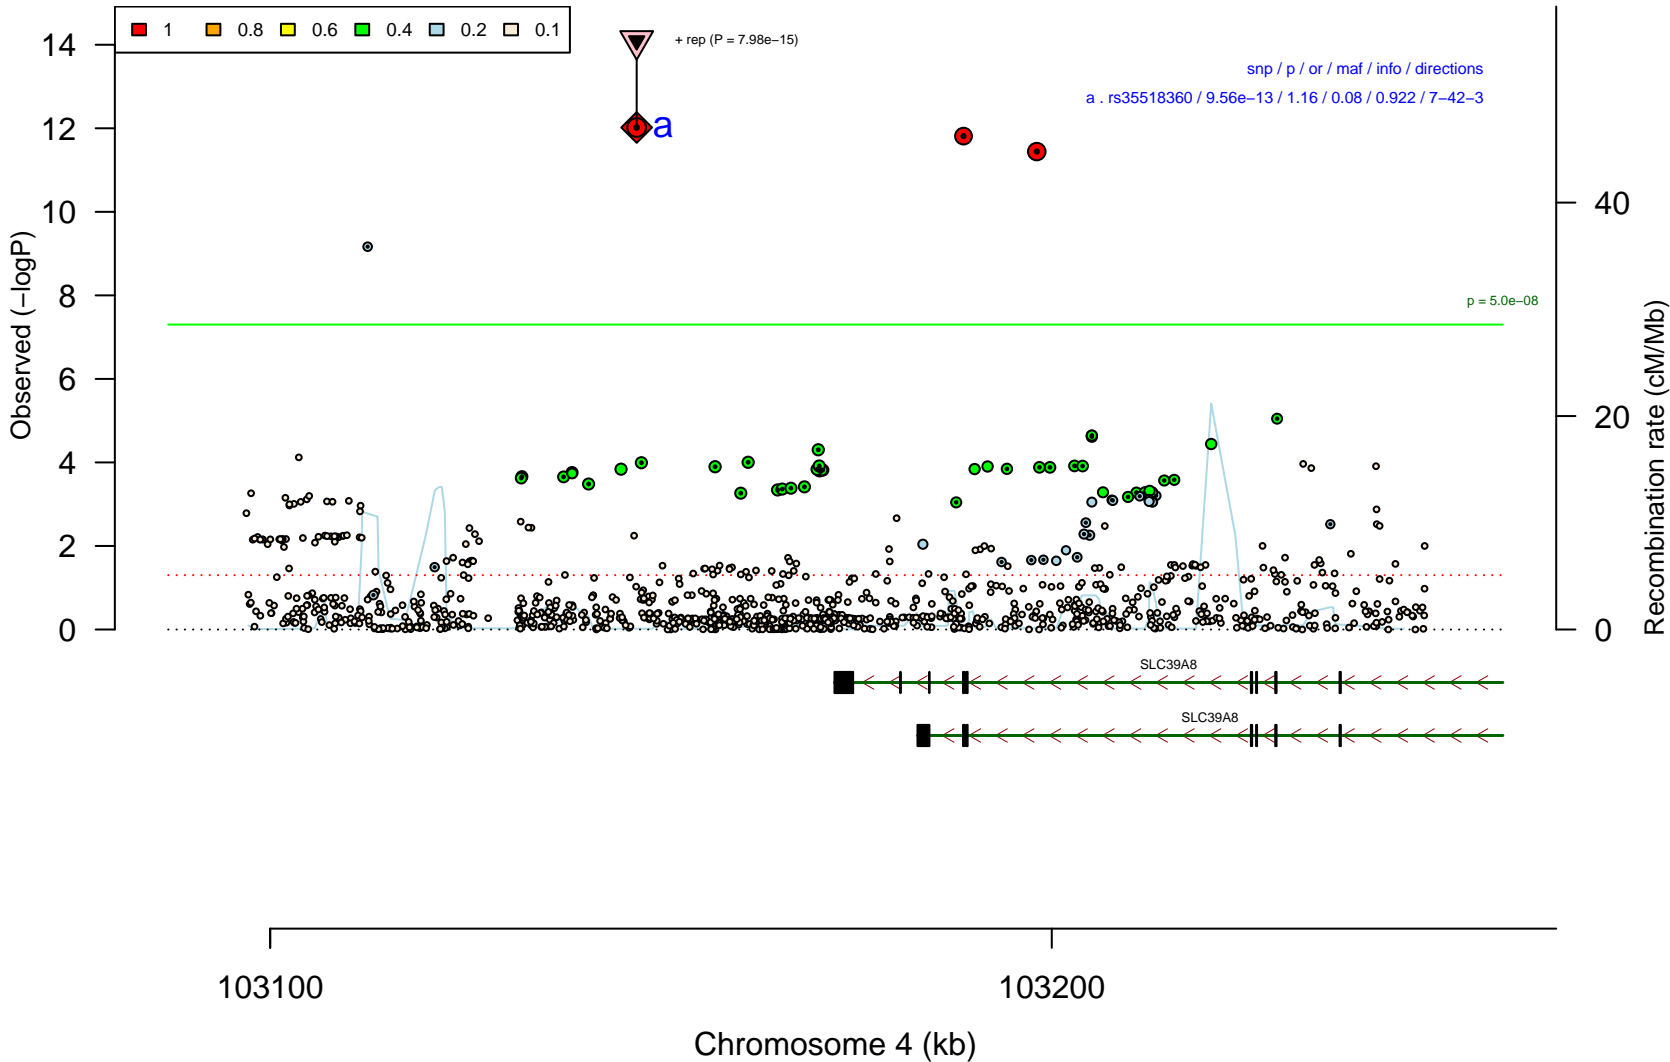

# PGC\_SCZ52.reg7

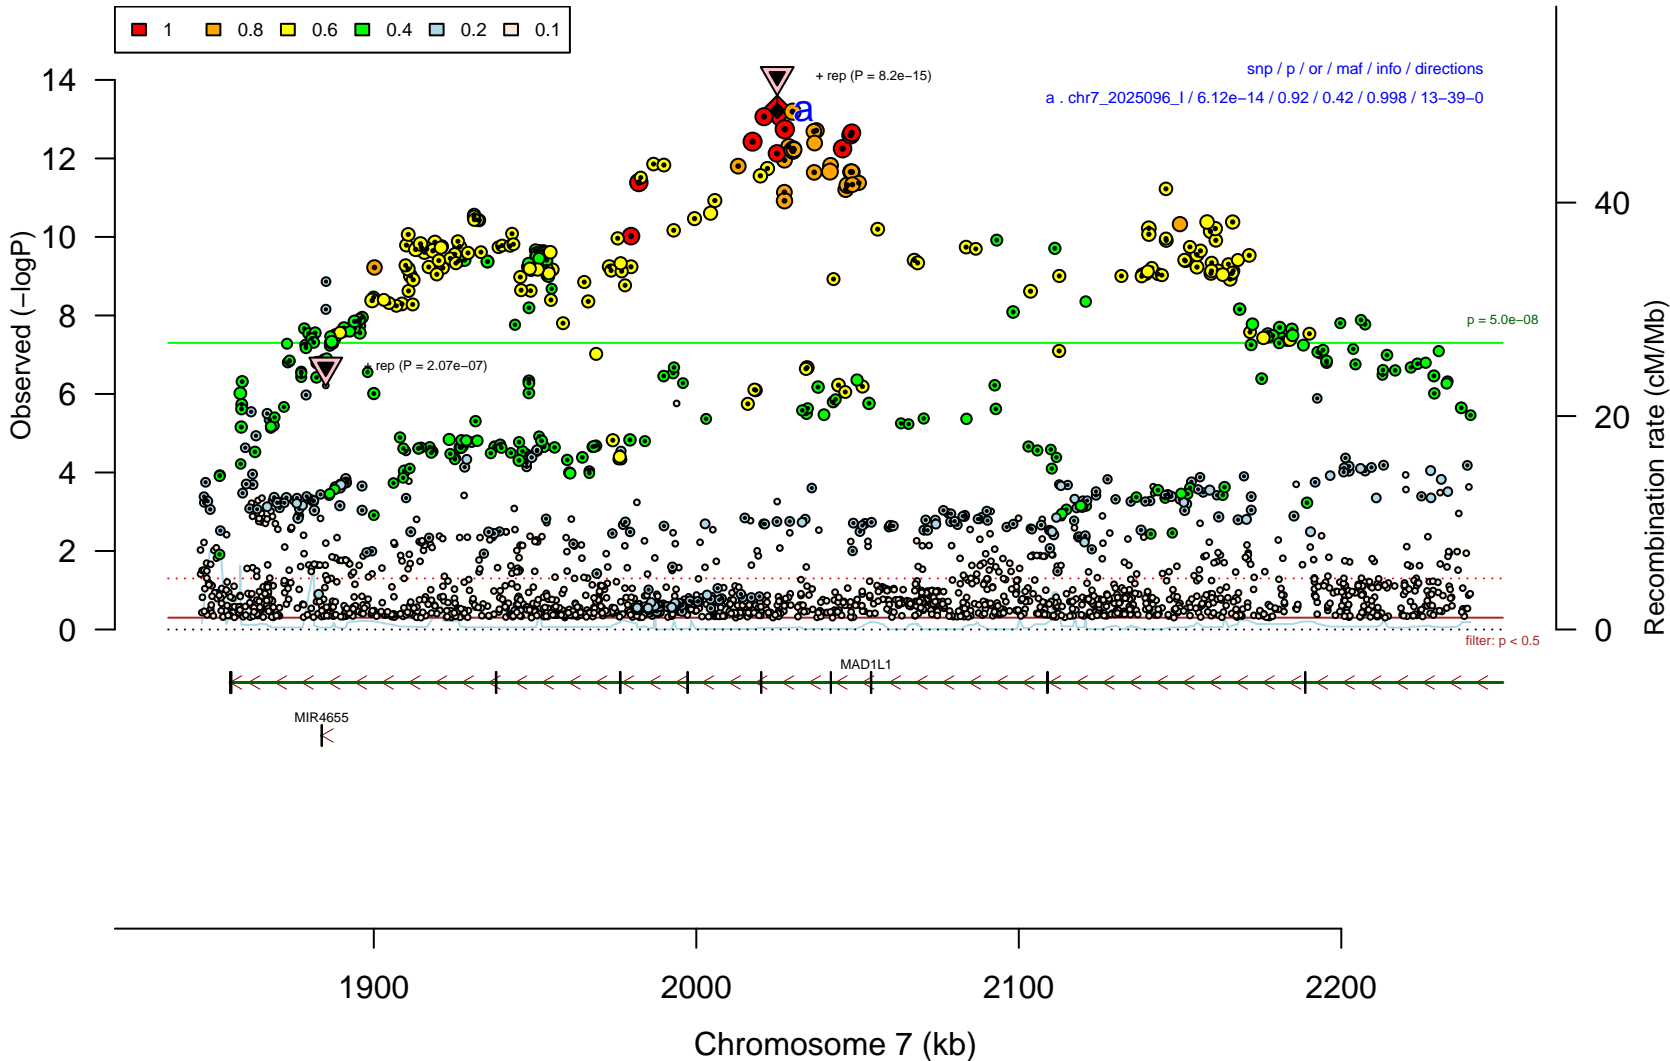

# PGC\_SCZ52.reg8

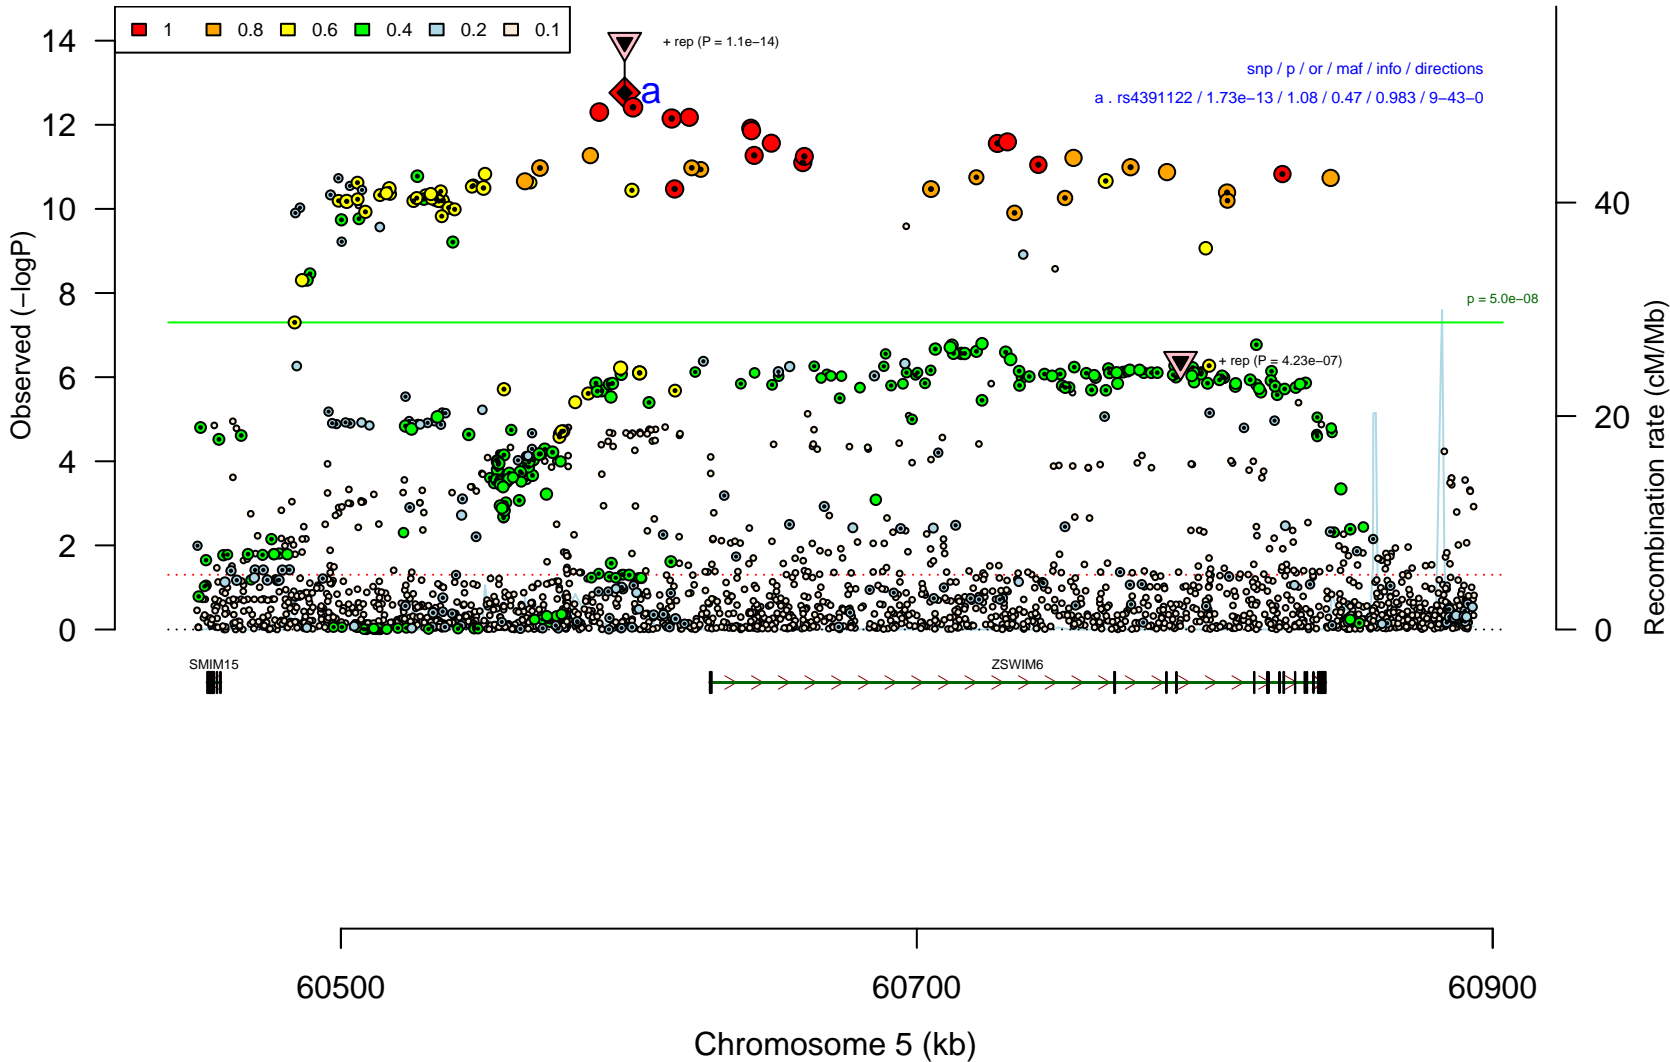



# PGC\_SCZ52.reg9

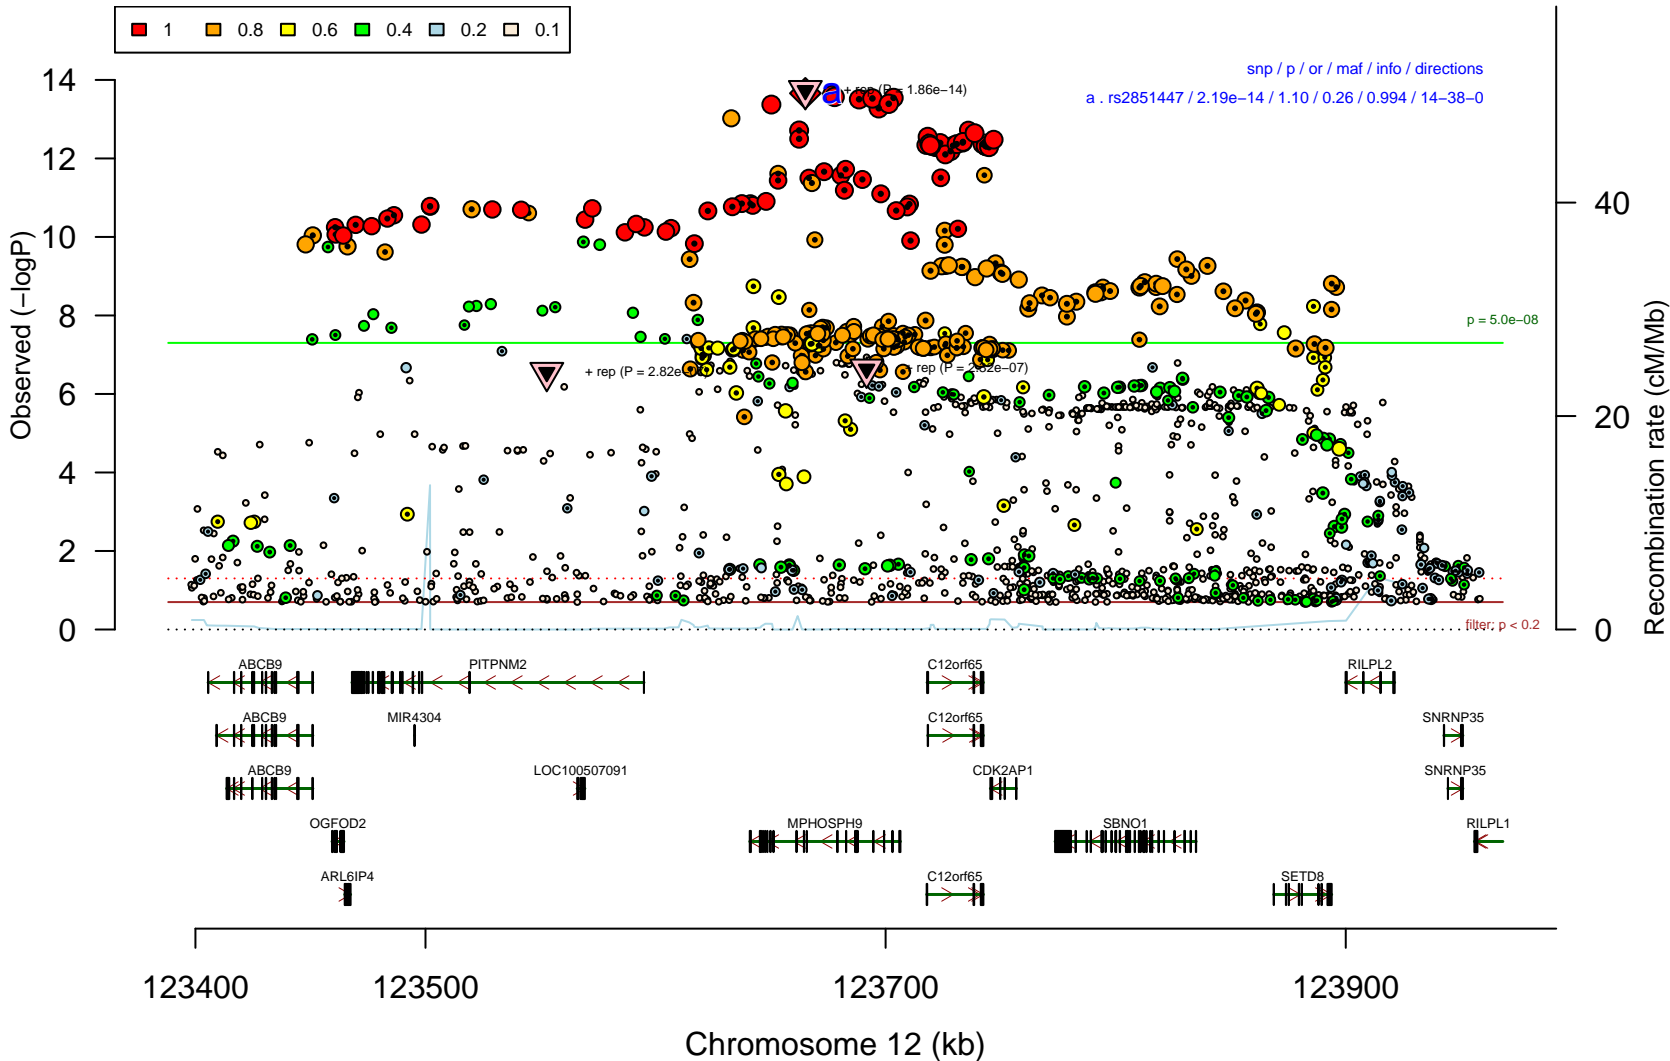

# PGC\_SCZ52.reg10

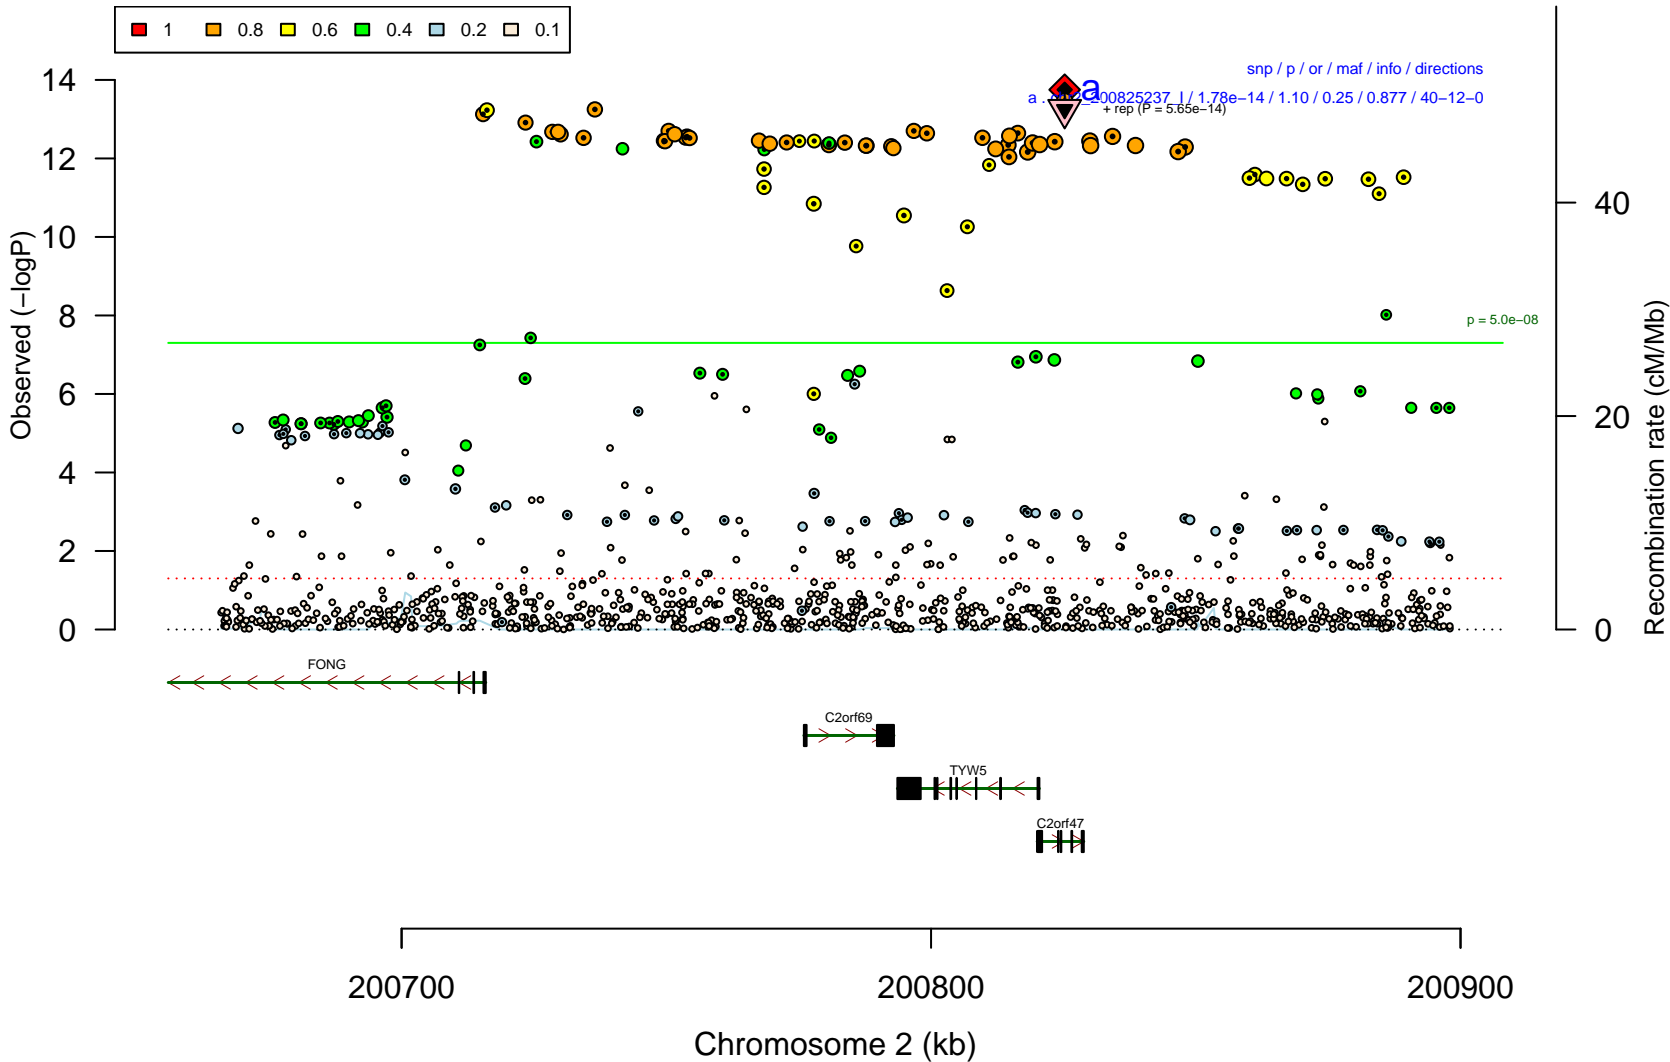

# PGC\_SCZ52.reg11

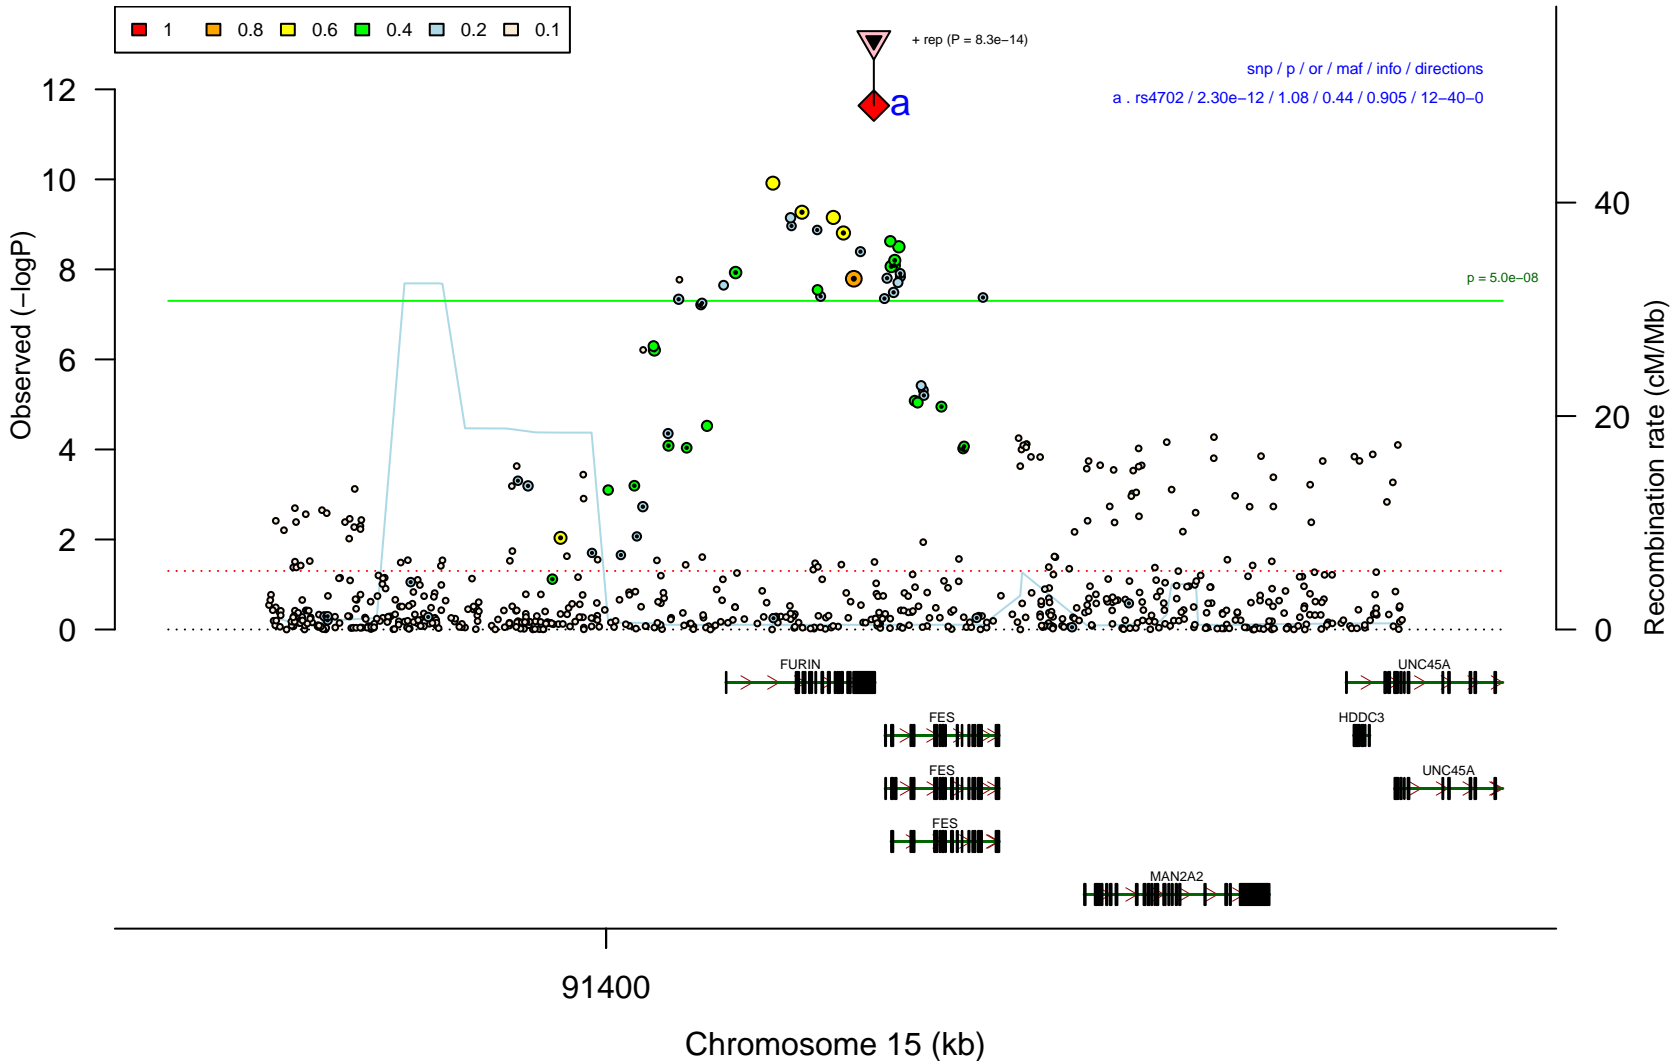

# PGC\_SCZ52.reg12

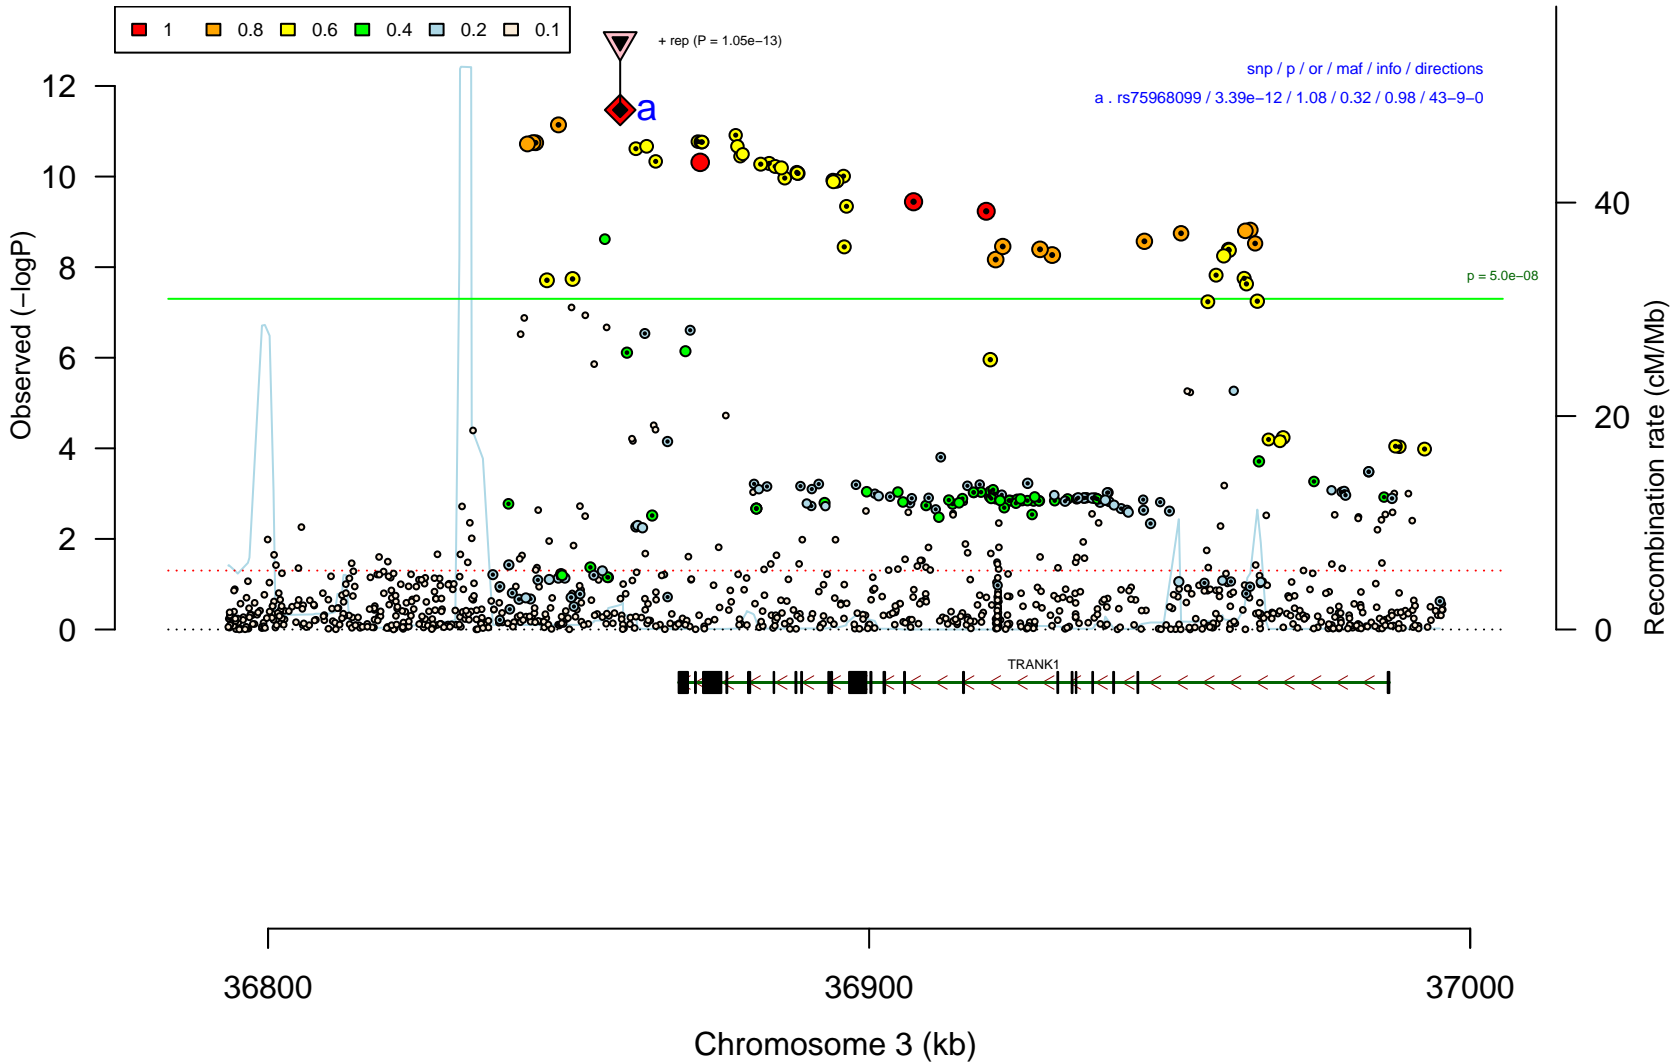

# PGC\_SCZ52.reg13

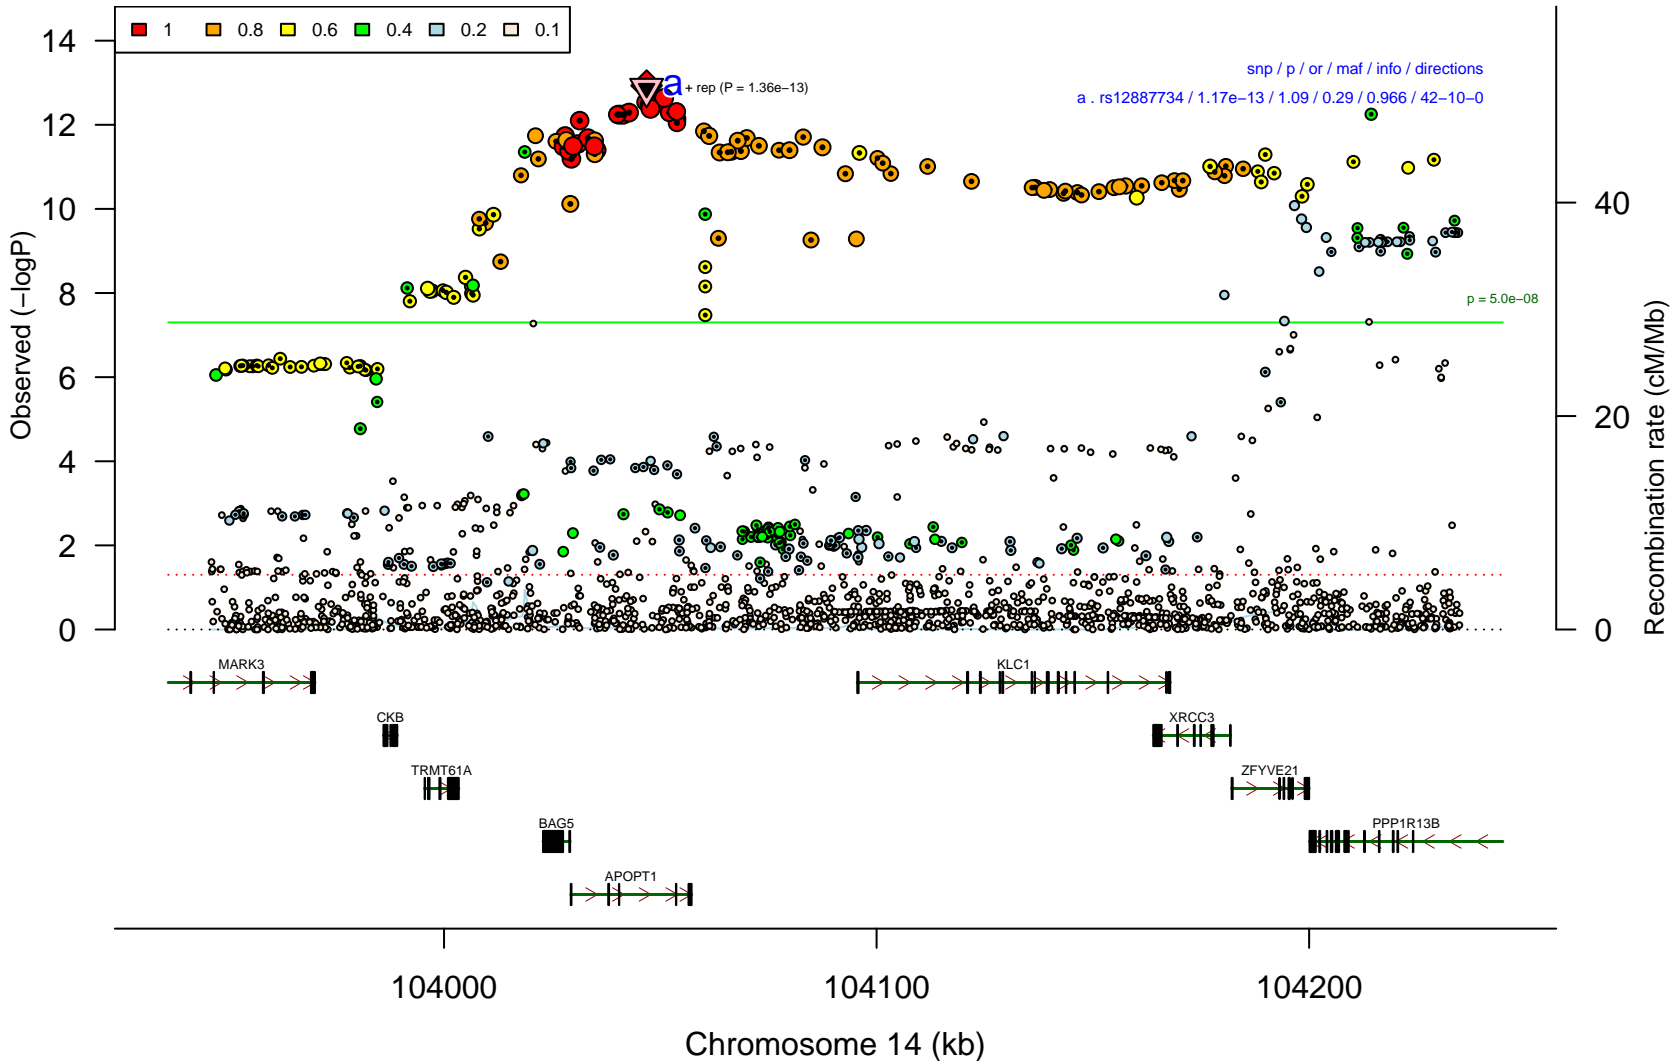

# PGC\_SCZ52.reg14

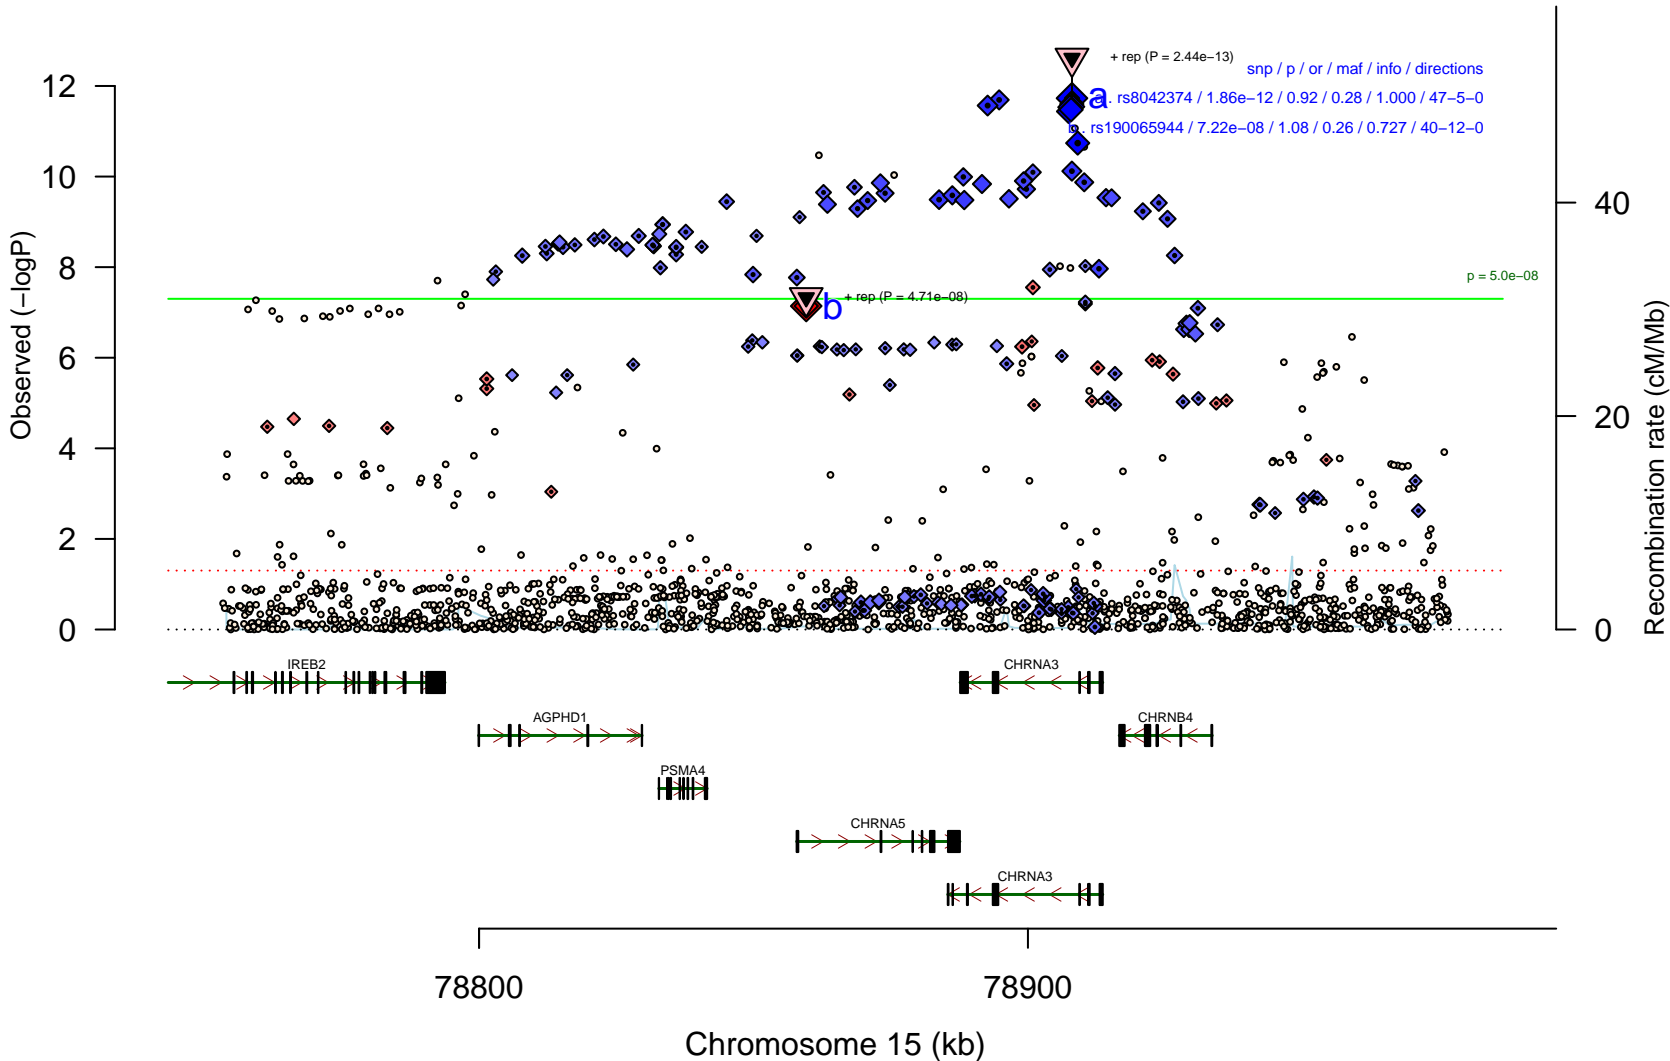

# PGC\_SCZ52.reg15

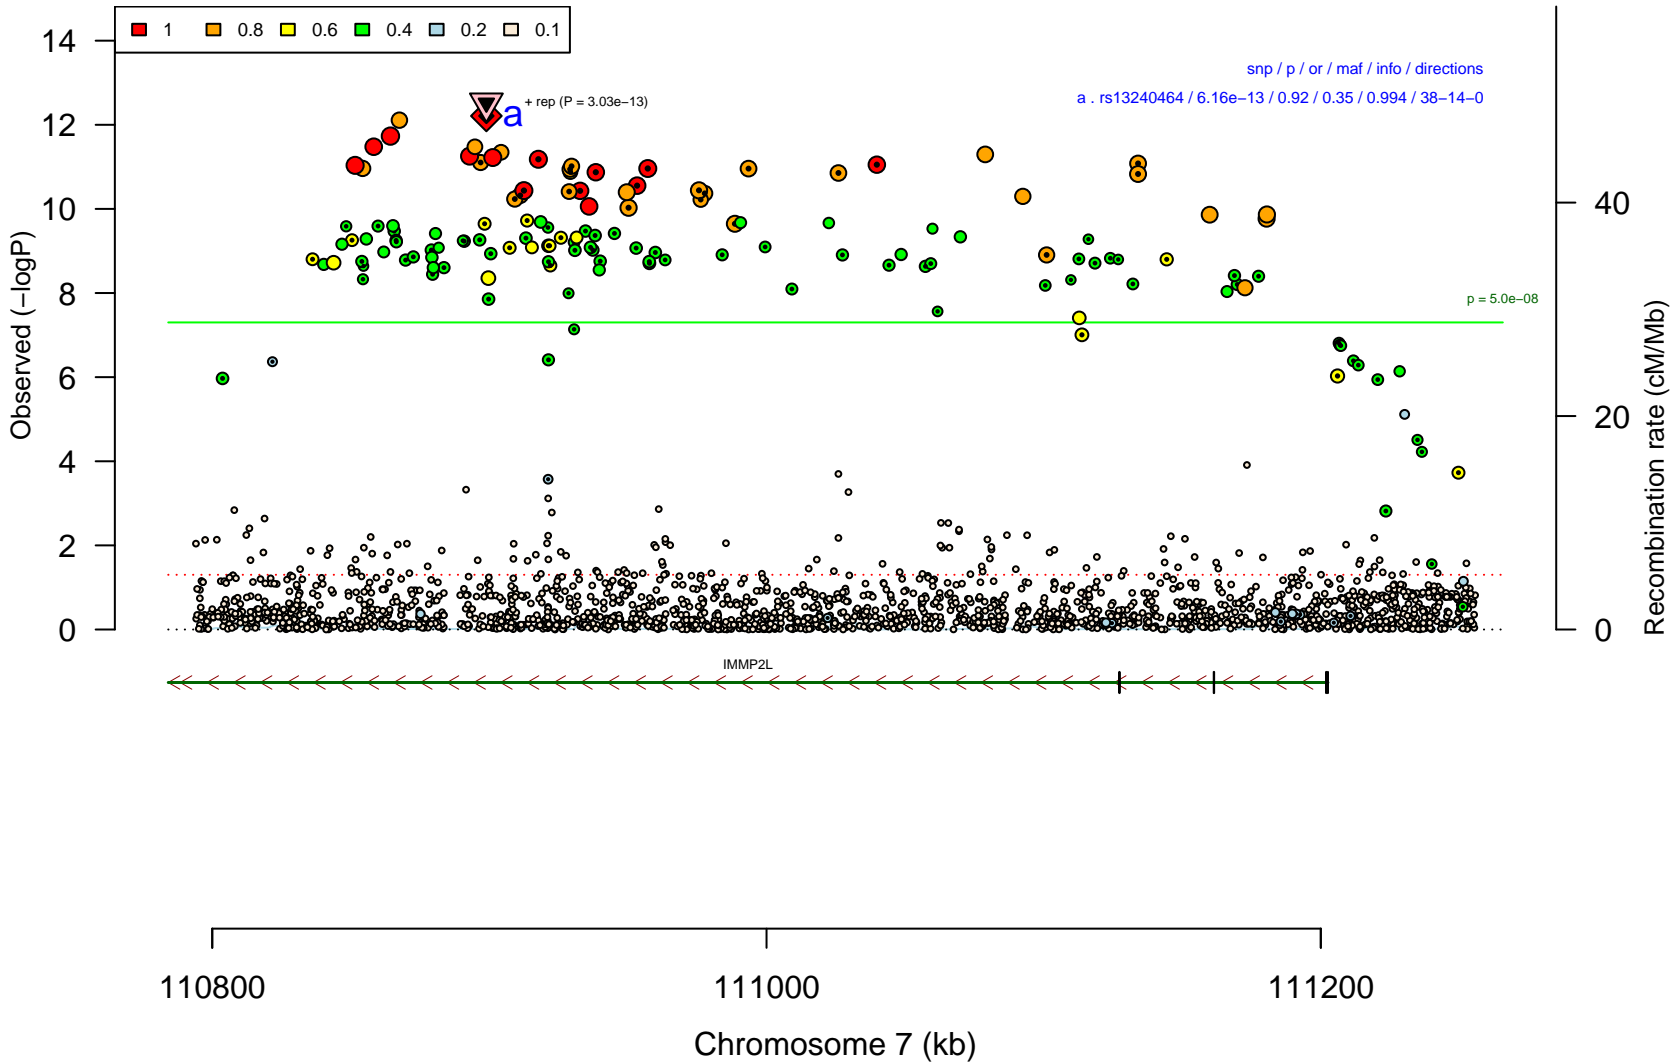

# PGC\_SCZ52.reg16

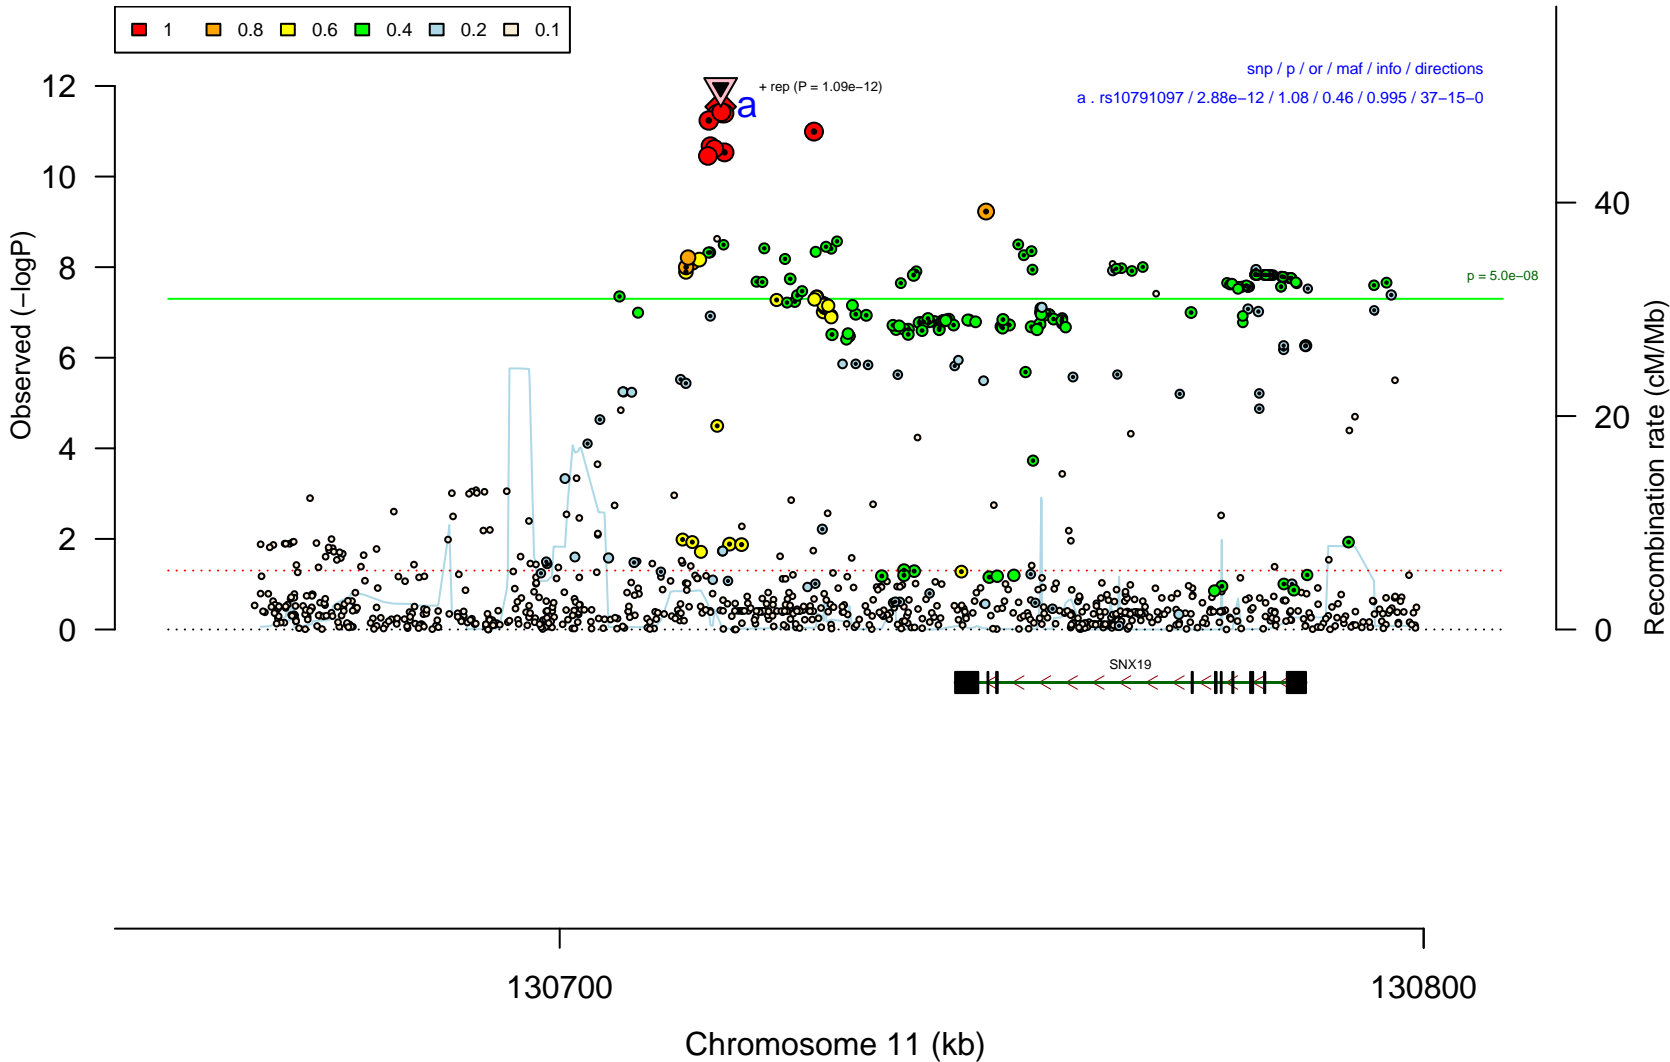



# PGC\_SCZ52.reg17

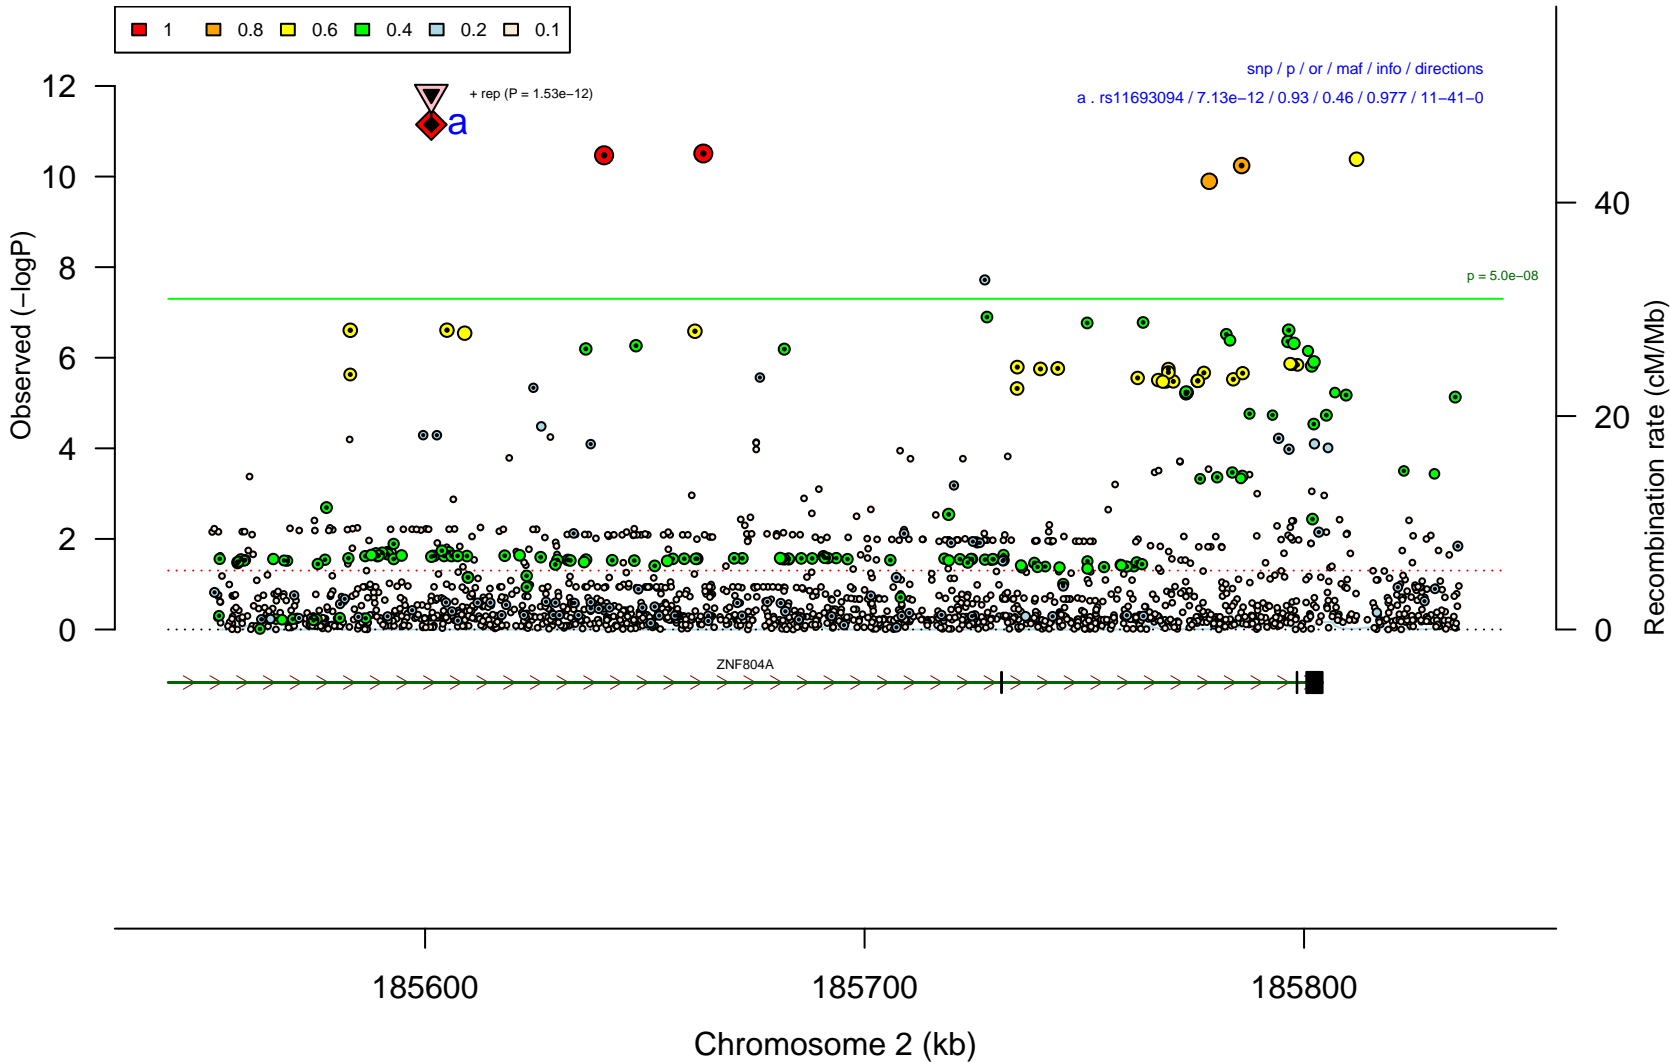

# PGC\_SCZ52.reg18

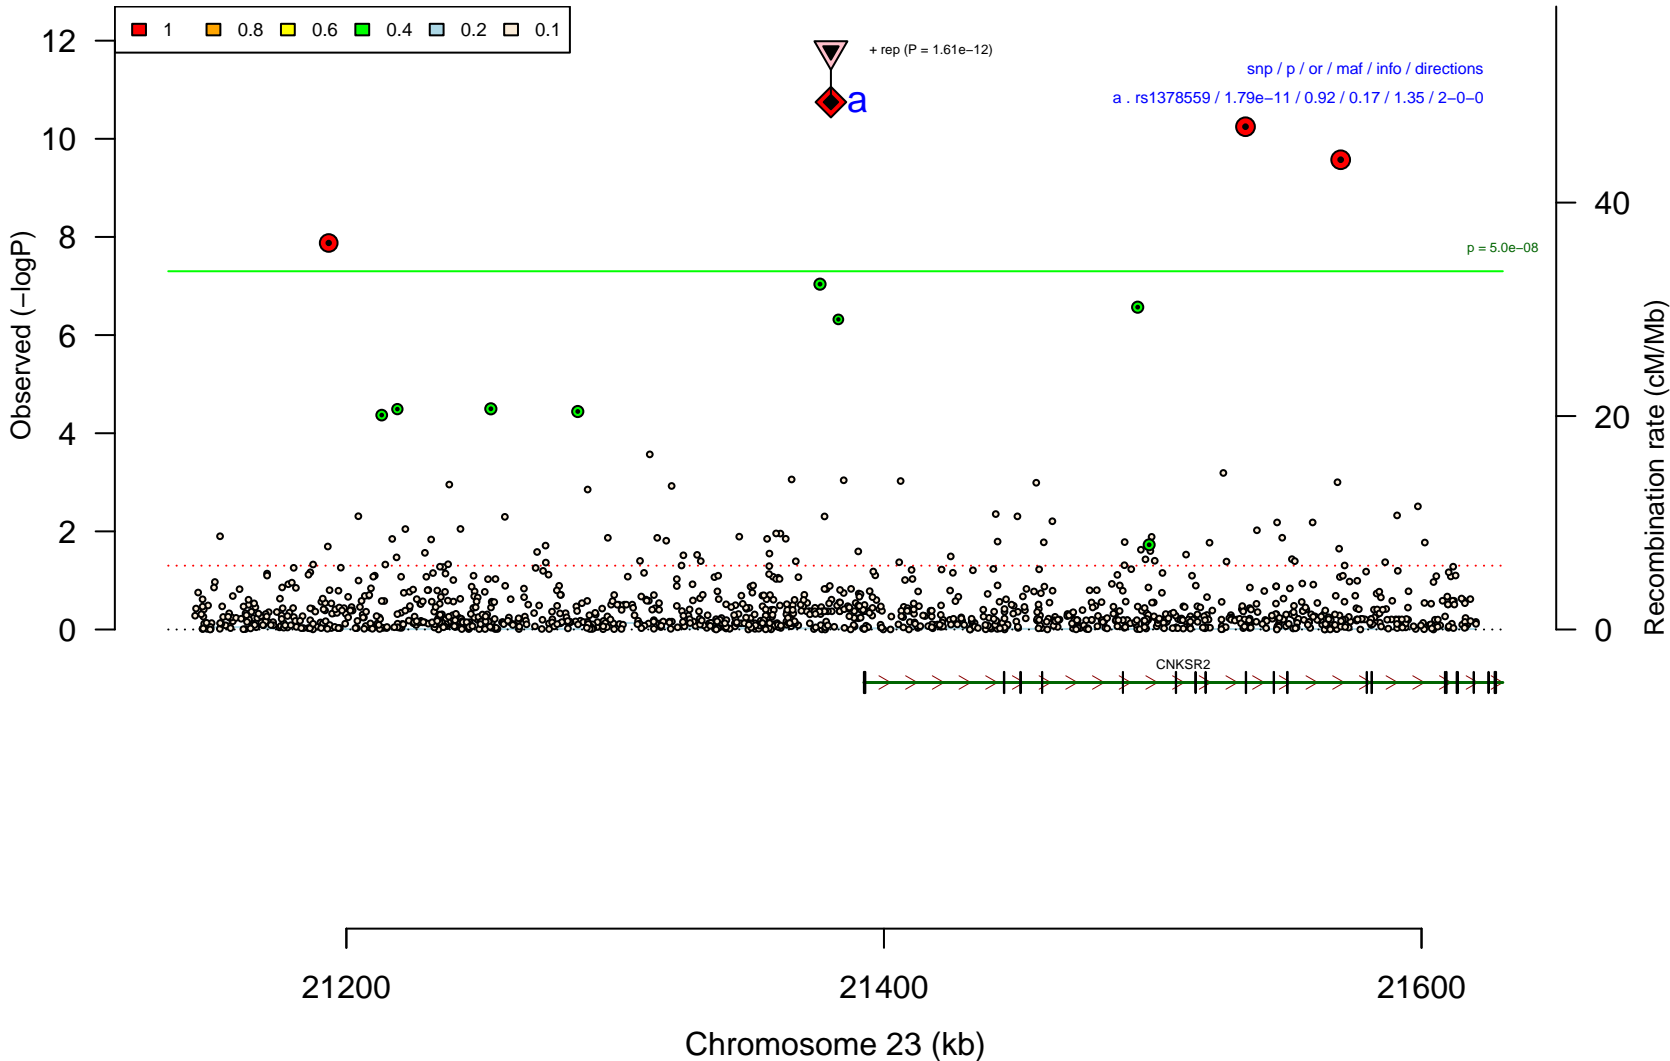

# PGC\_SCZ52.reg19

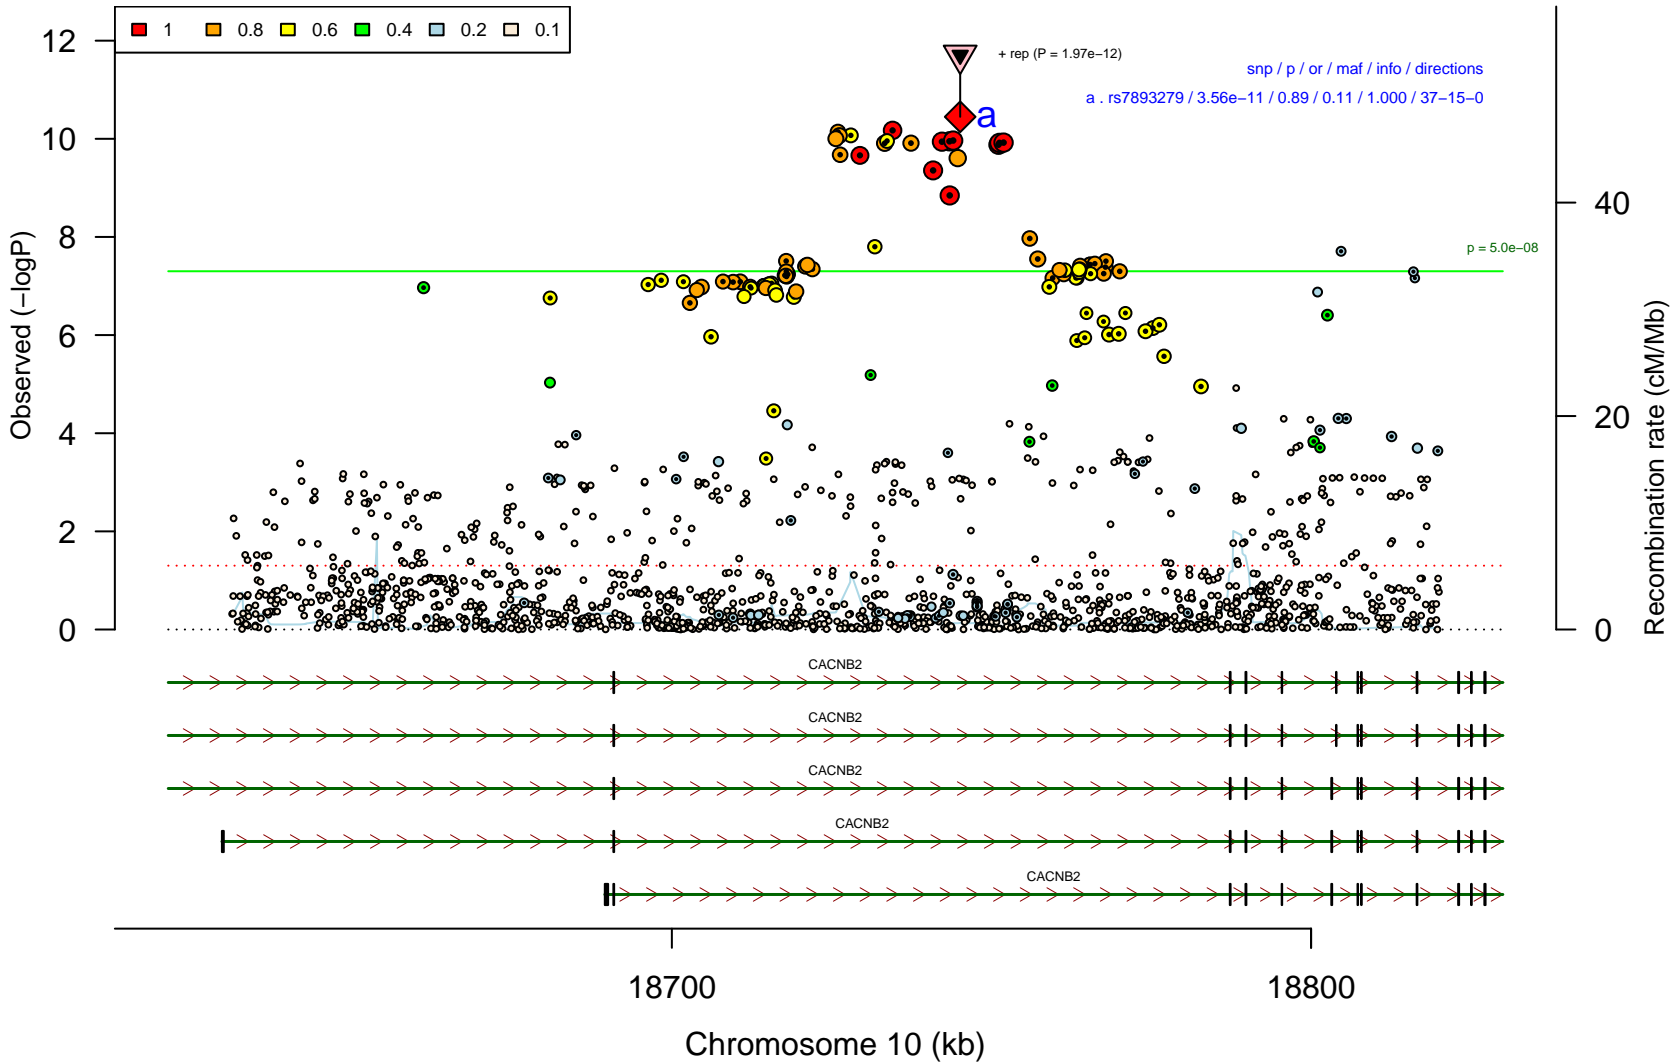

# PGC\_SCZ52.reg20

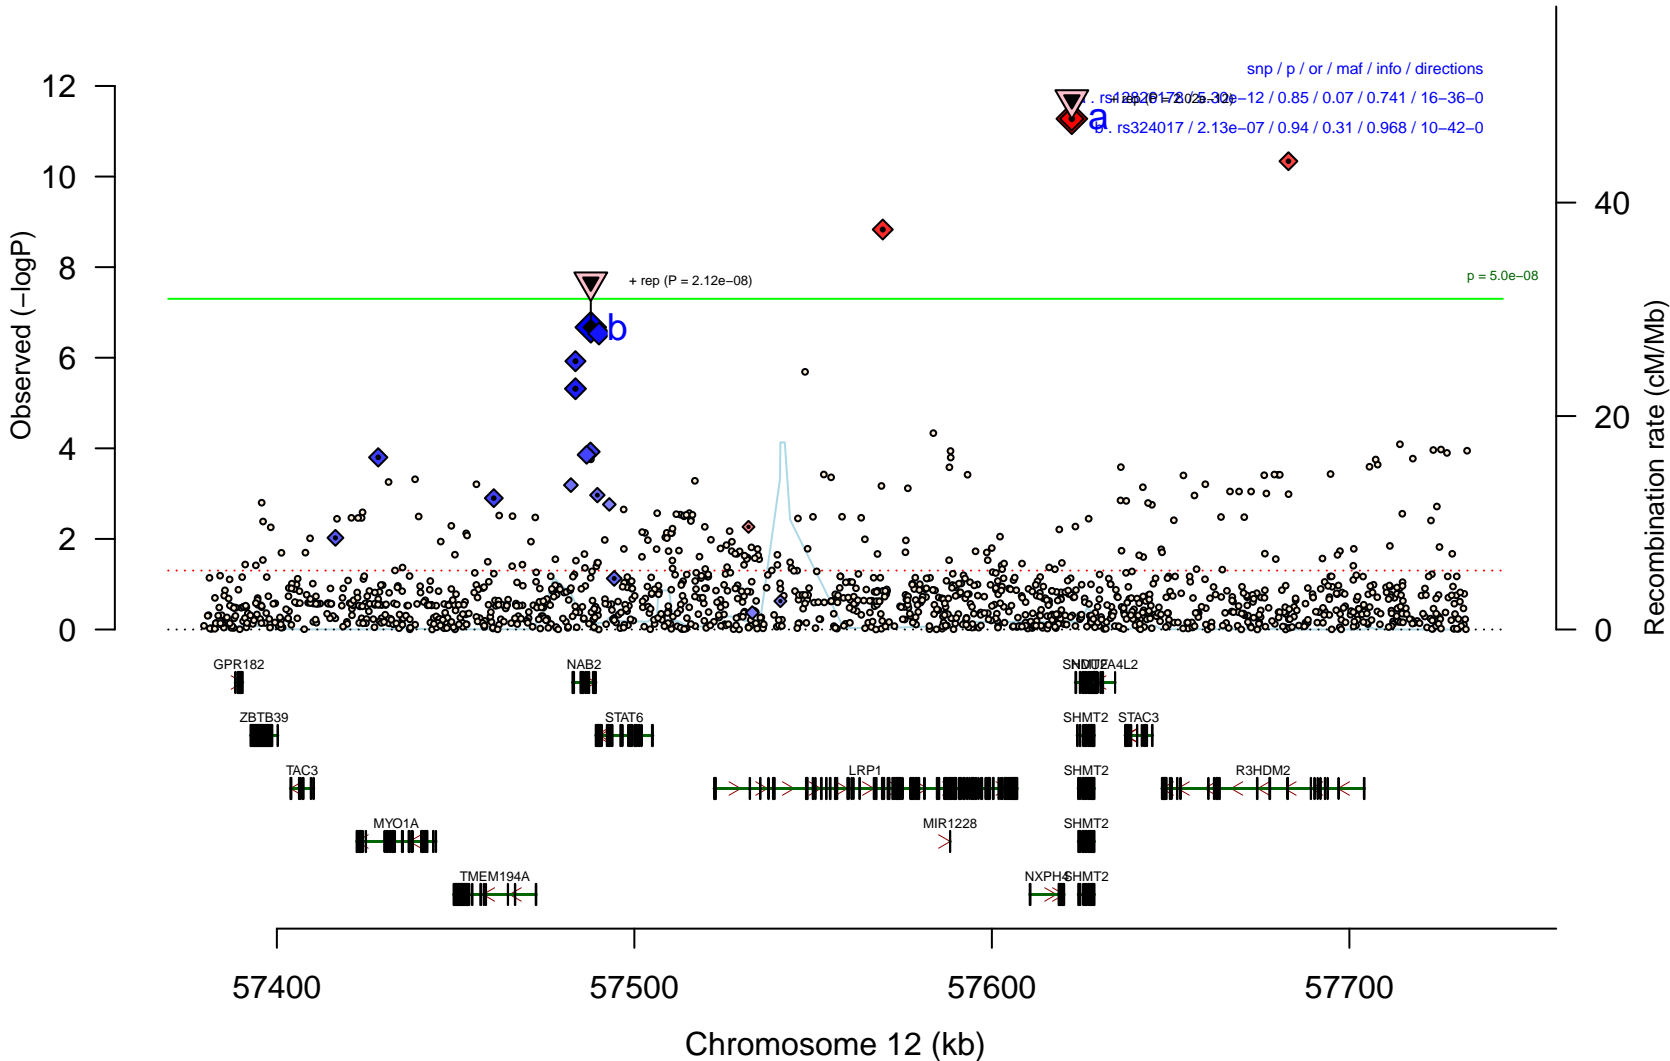

# PGC\_SCZ52.reg21

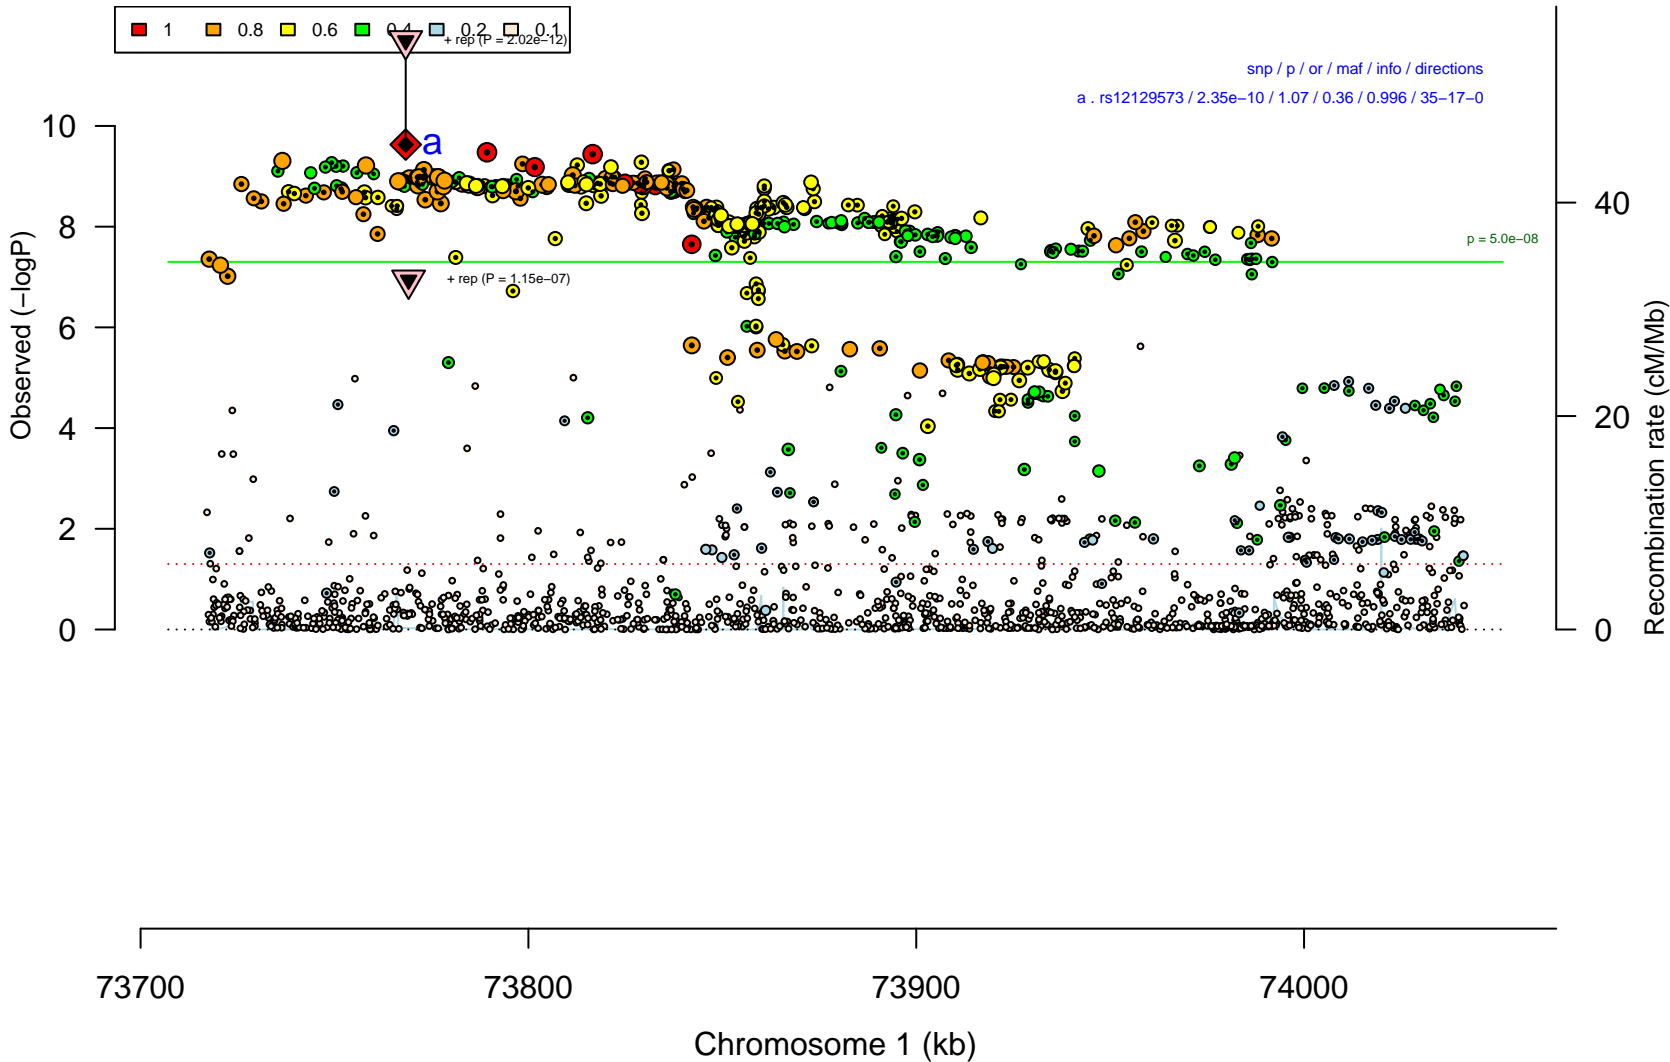

# PGC\_SCZ52.reg22

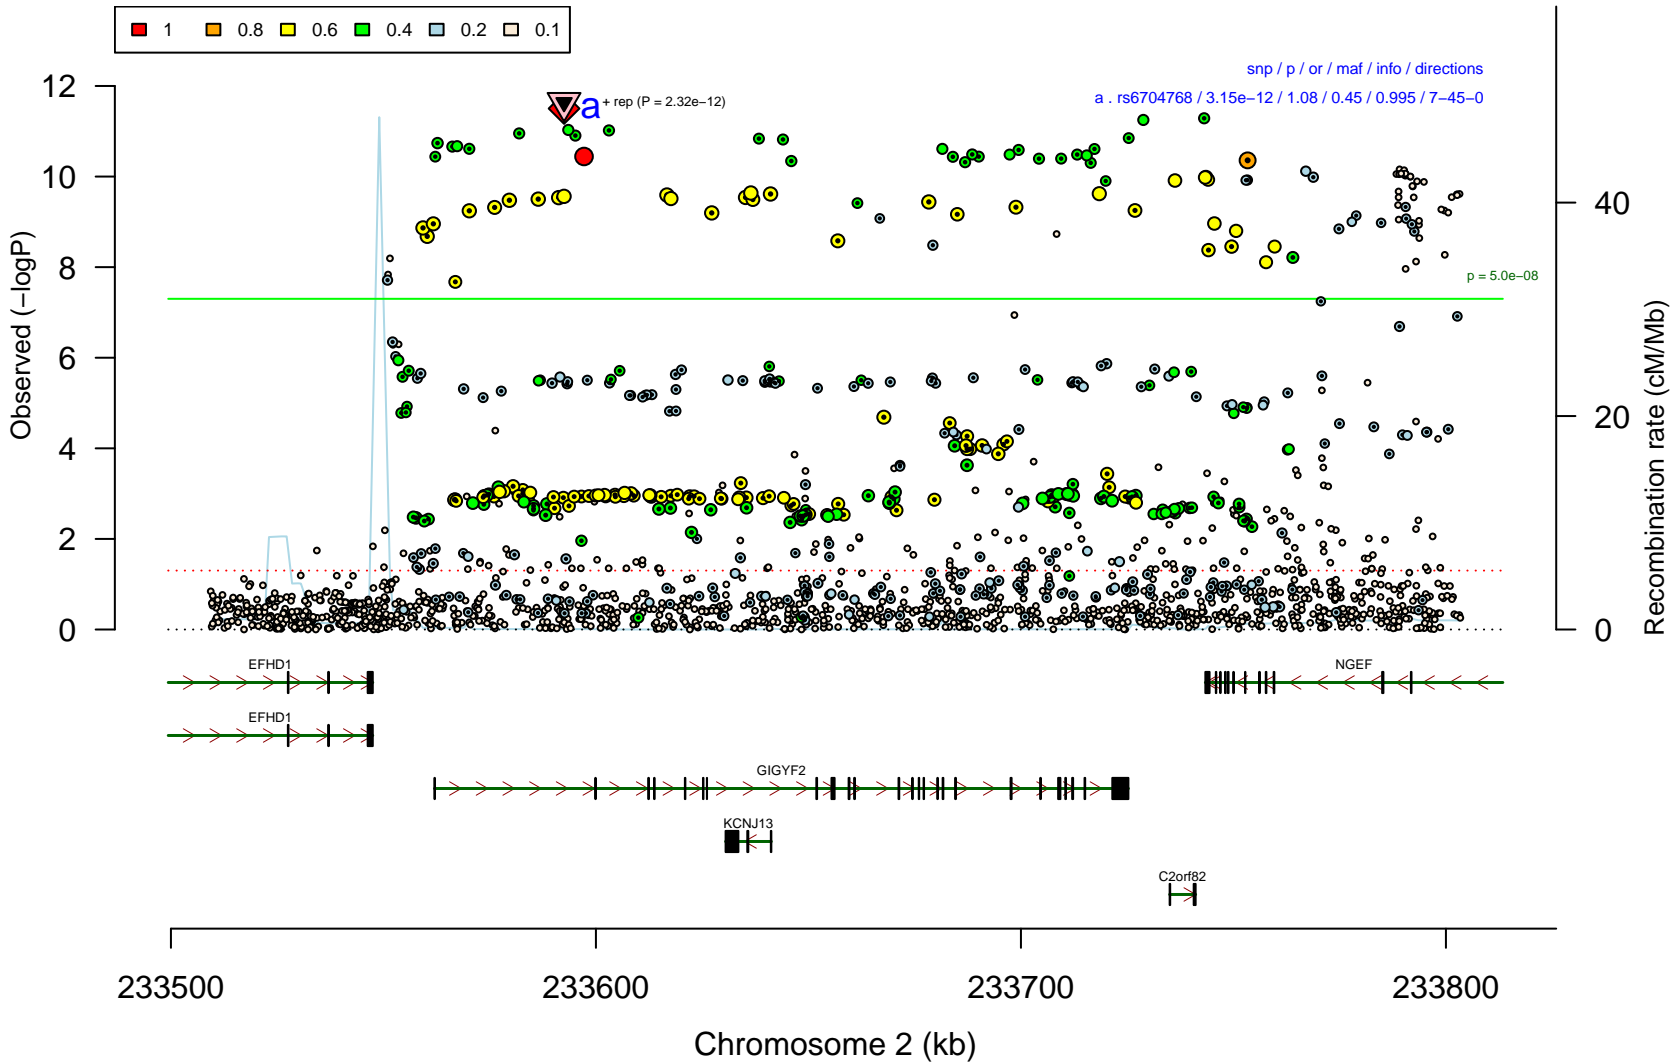

# PGC\_SCZ52.reg23

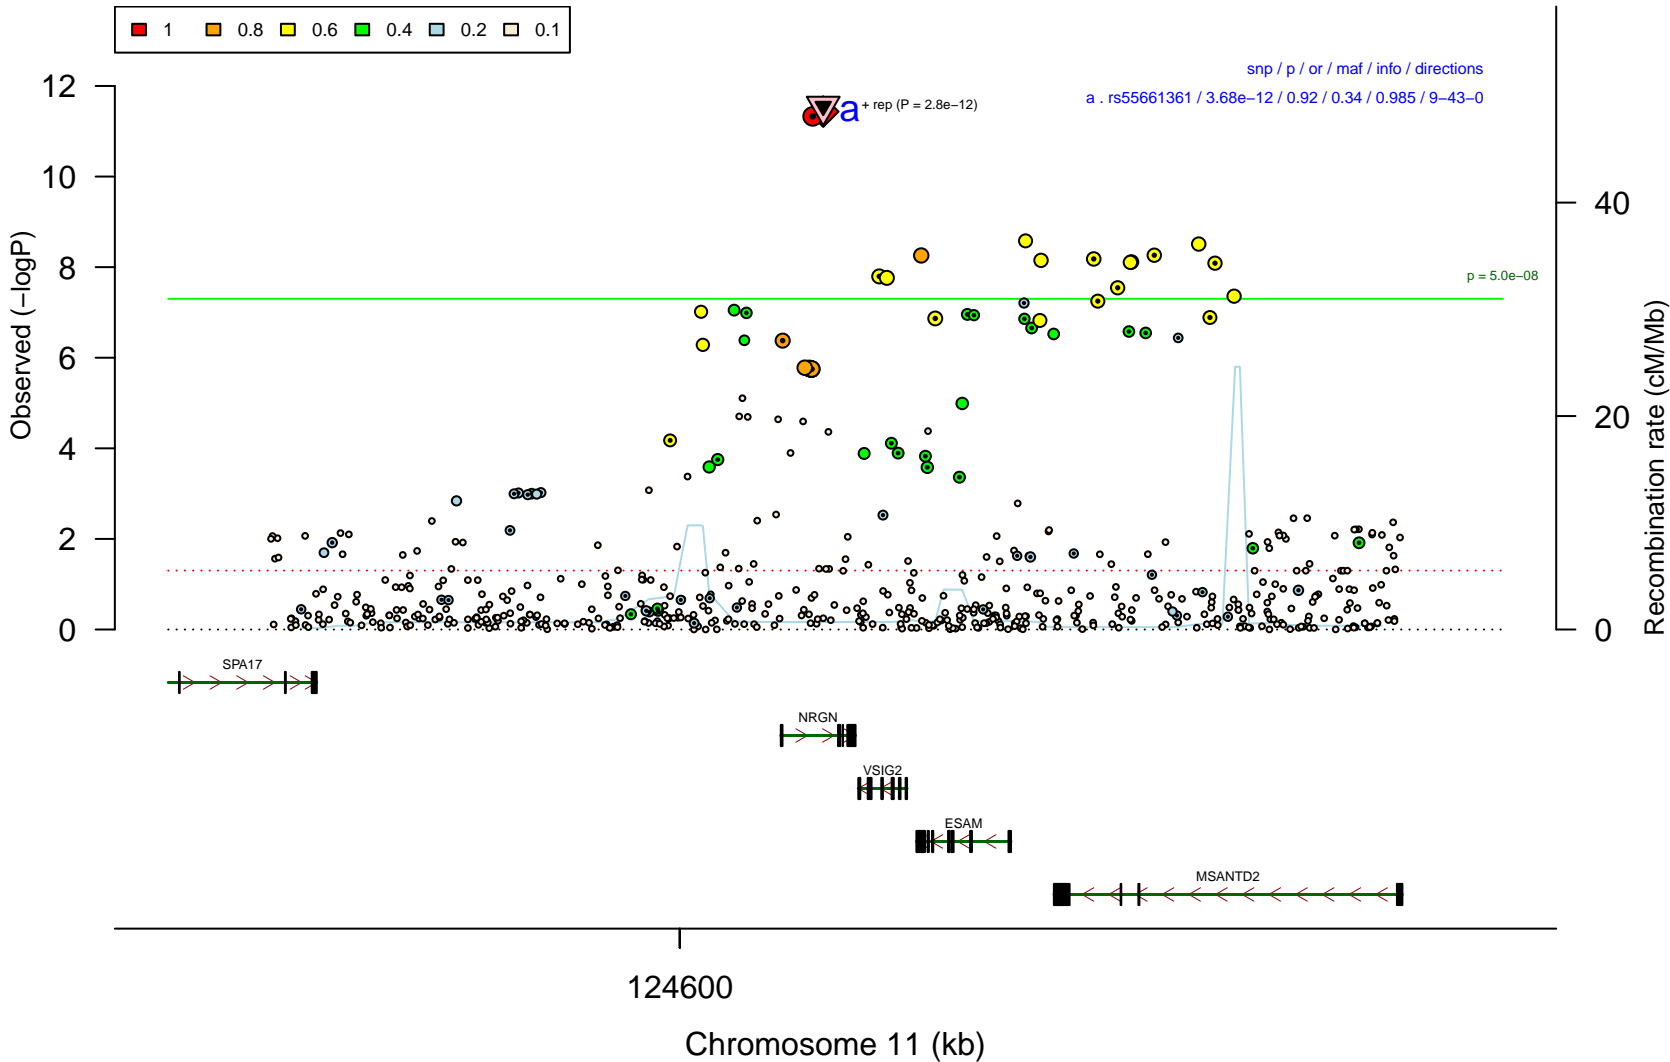

# PGC\_SCZ52.reg24

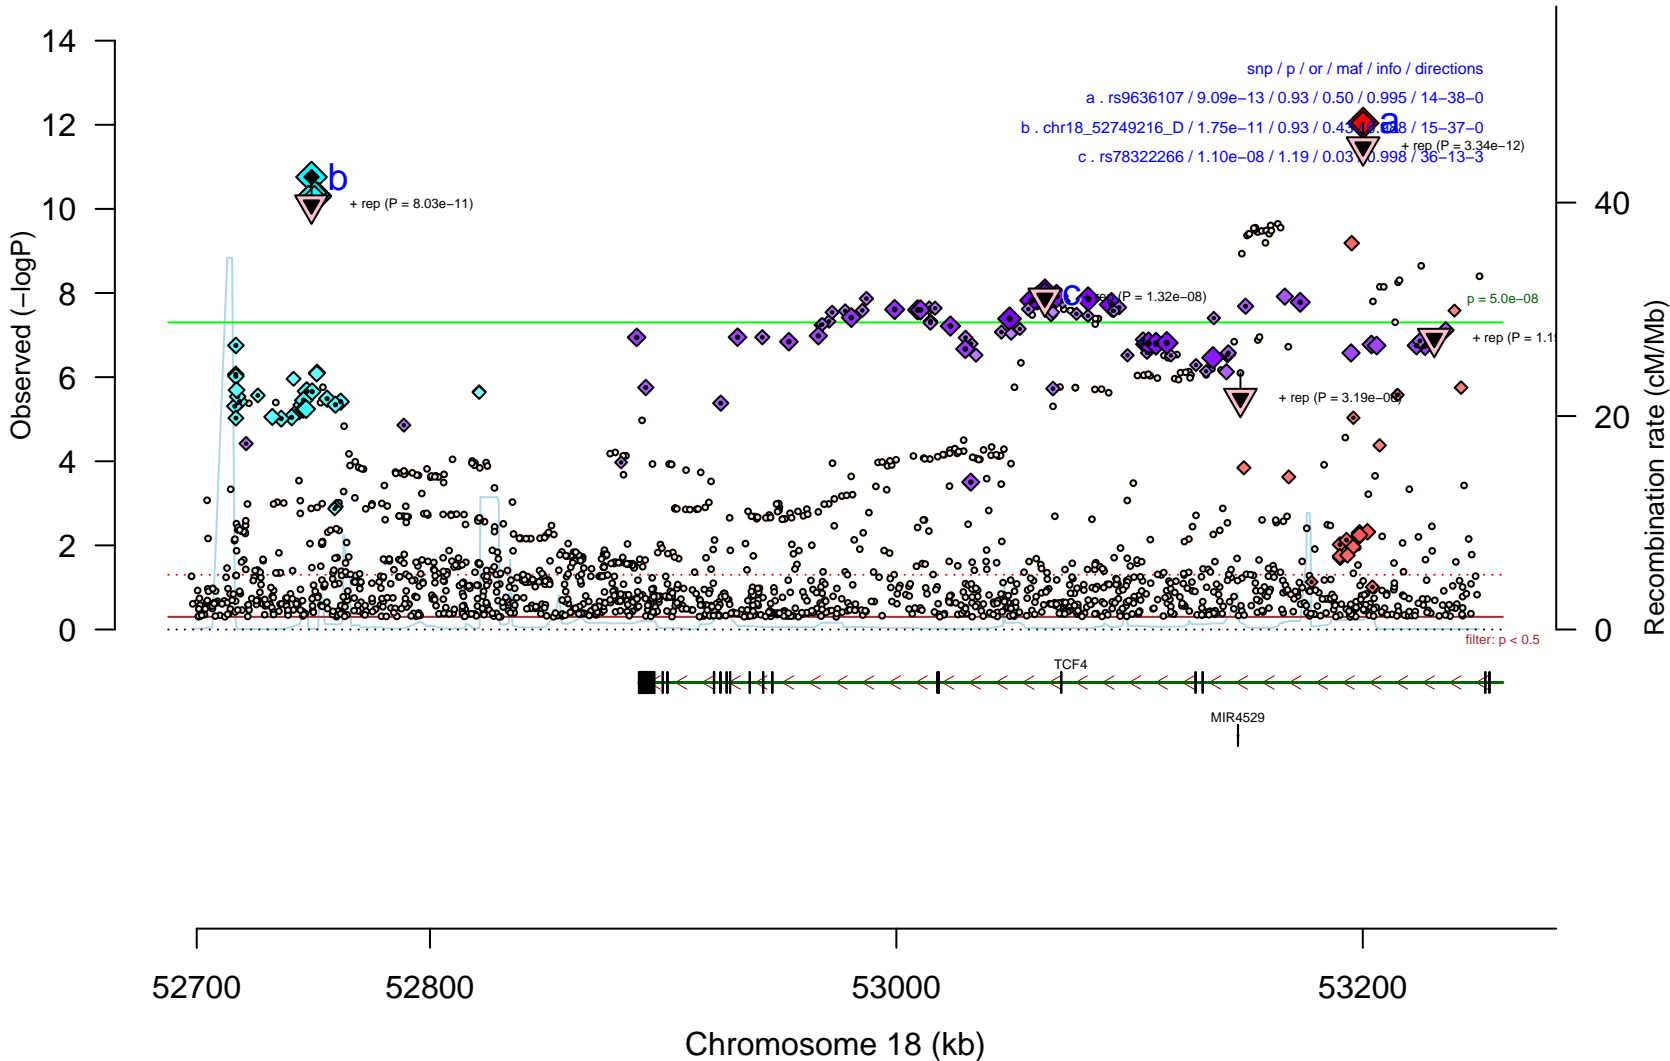



# PGC\_SCZ52.reg25

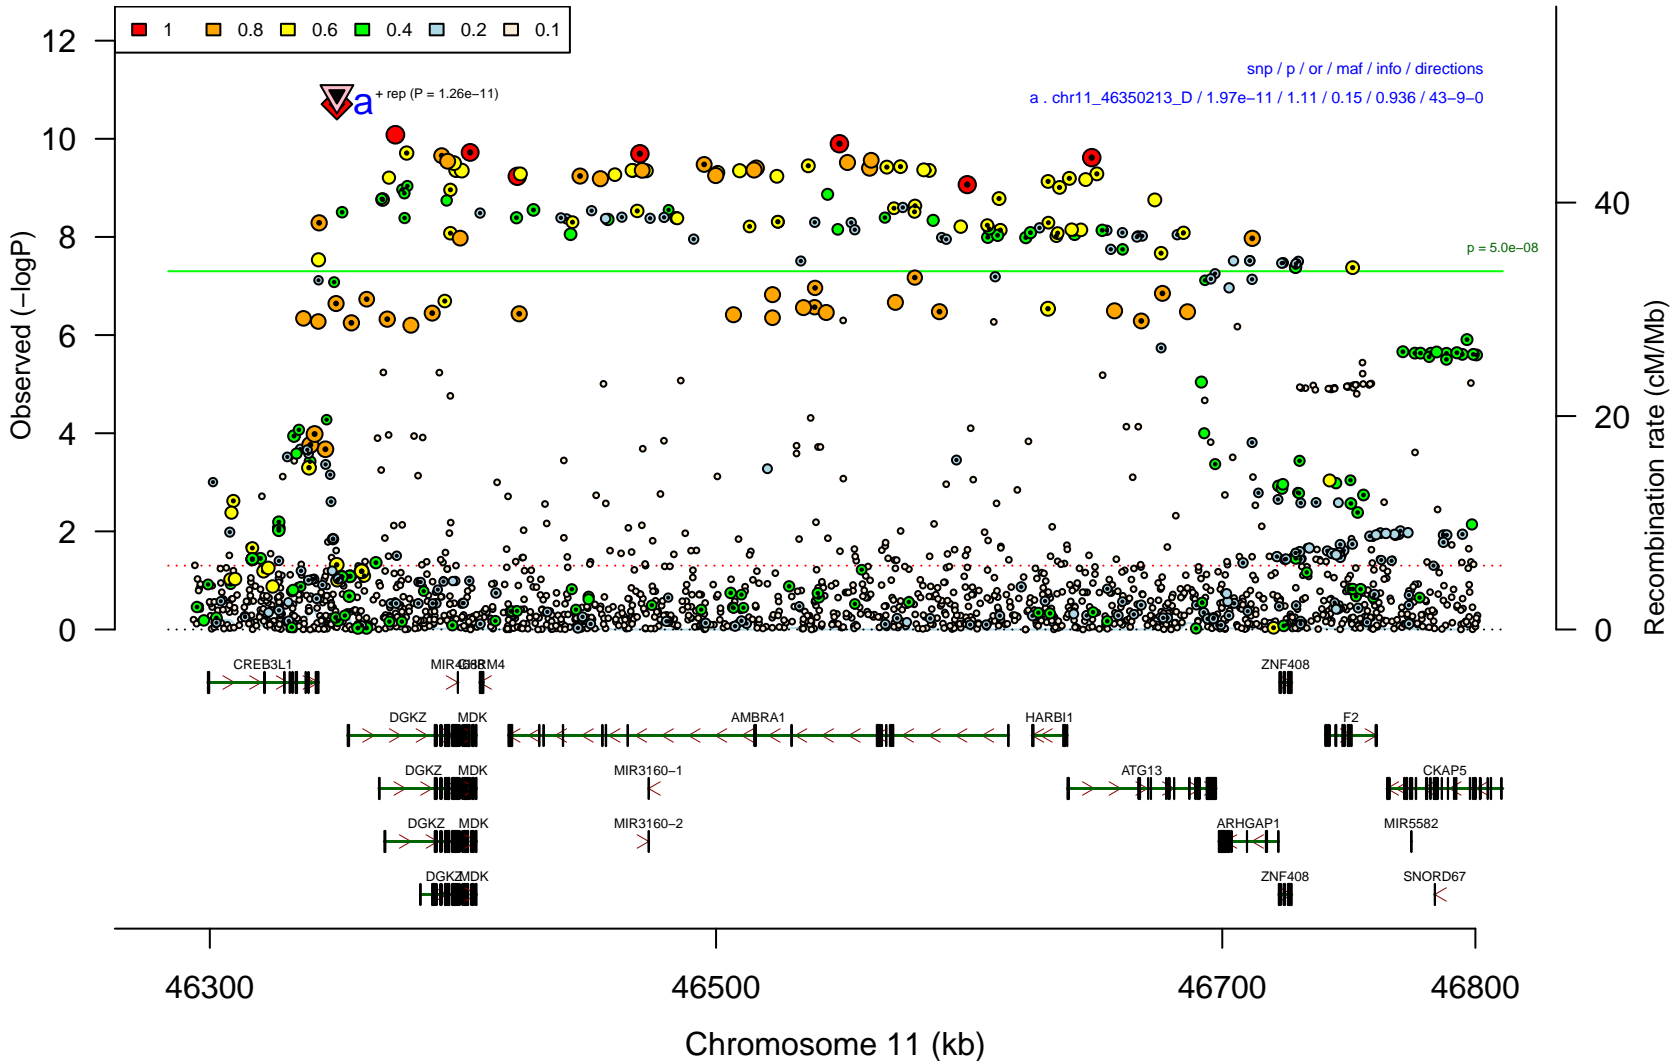

# PGC\_SCZ52.reg26

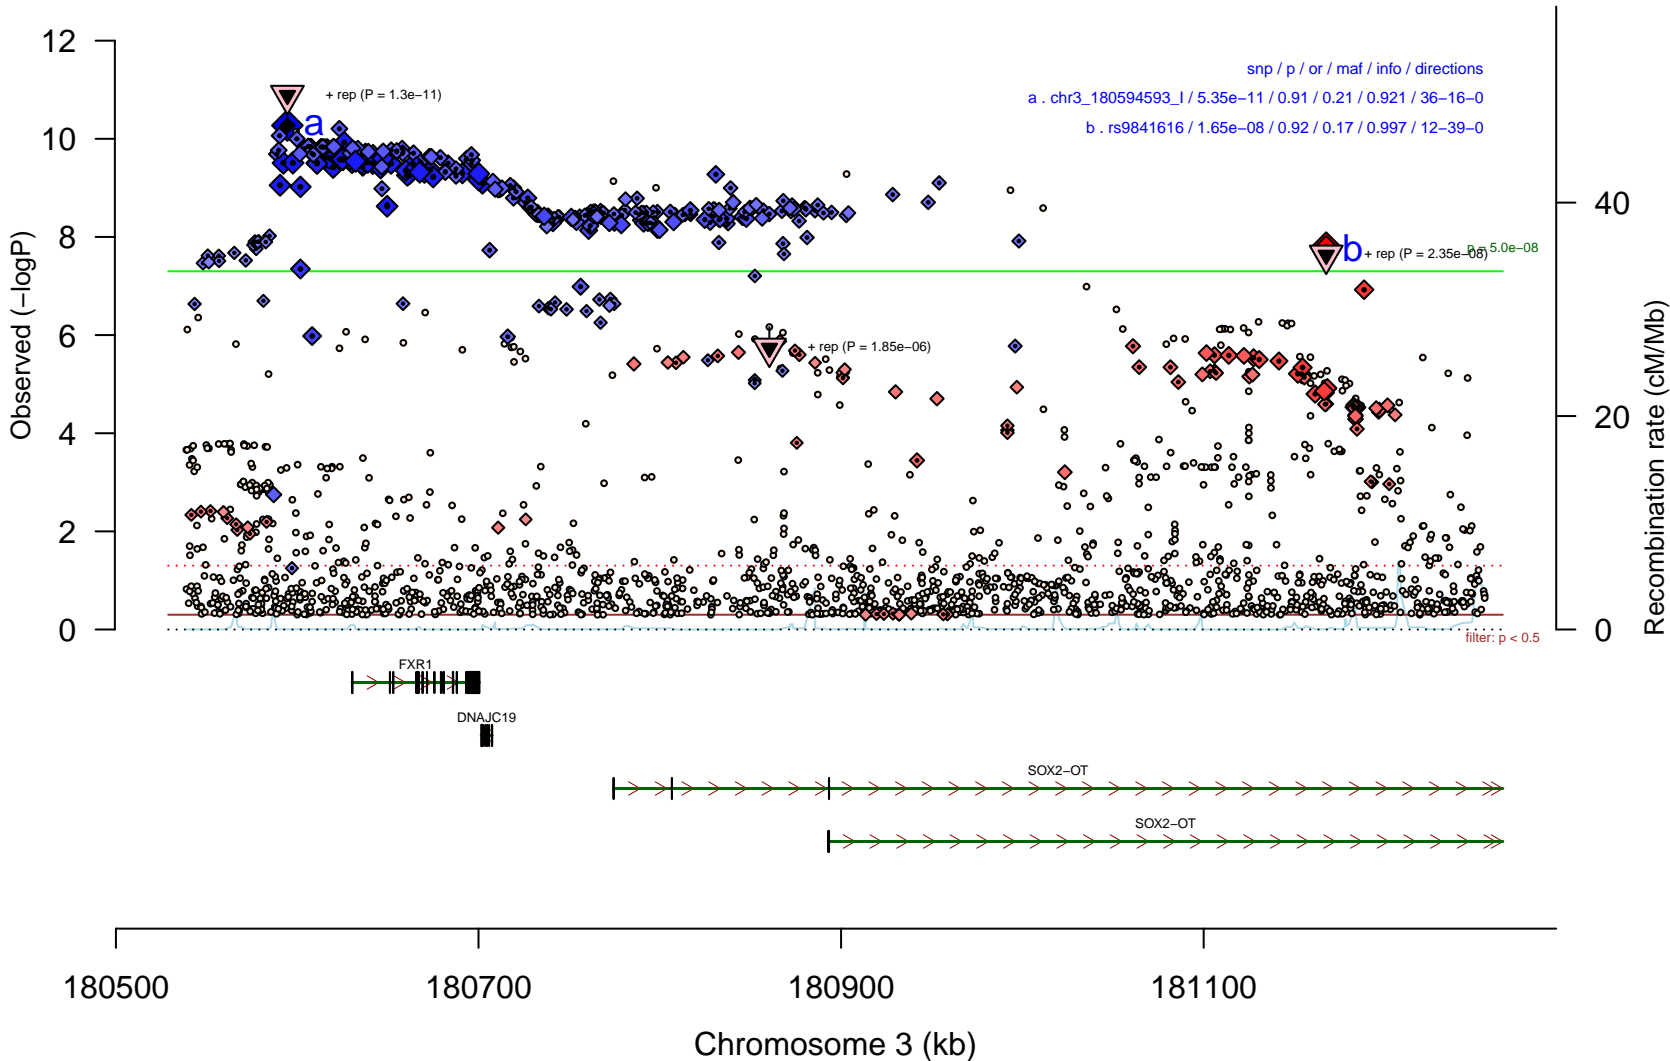

# PGC\_SCZ52.reg27

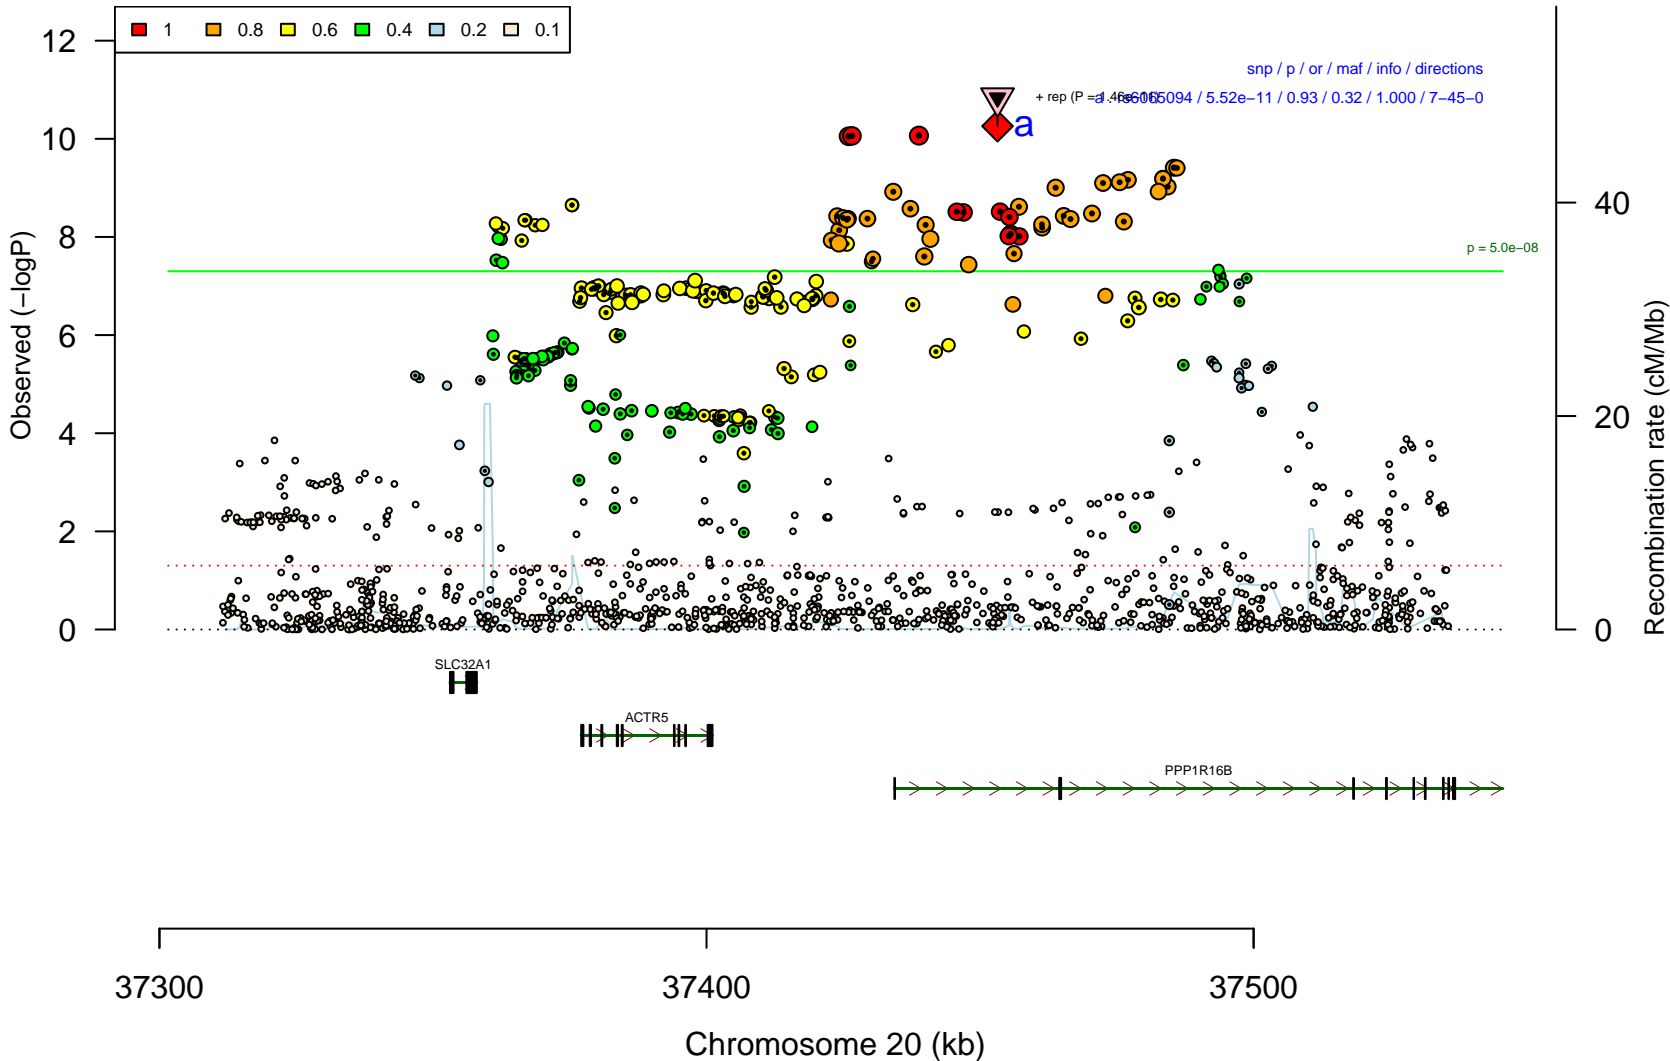

# PGC\_SCZ52.reg28

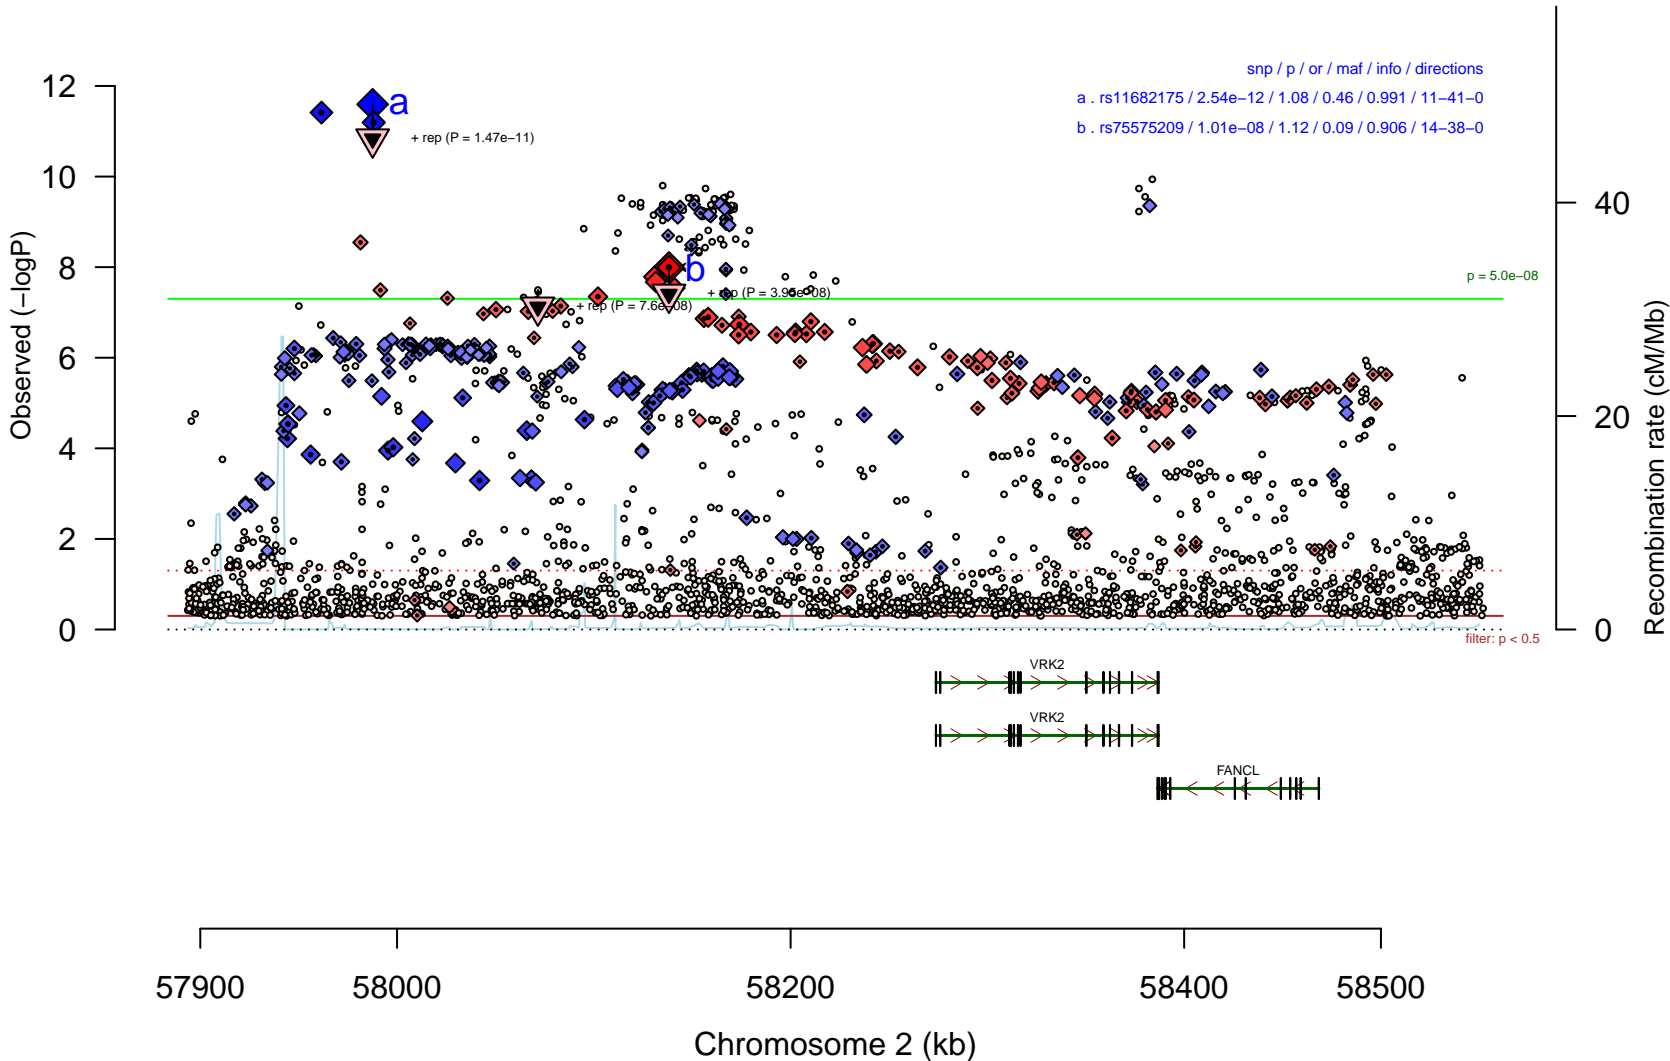

# PGC\_SCZ52.reg29

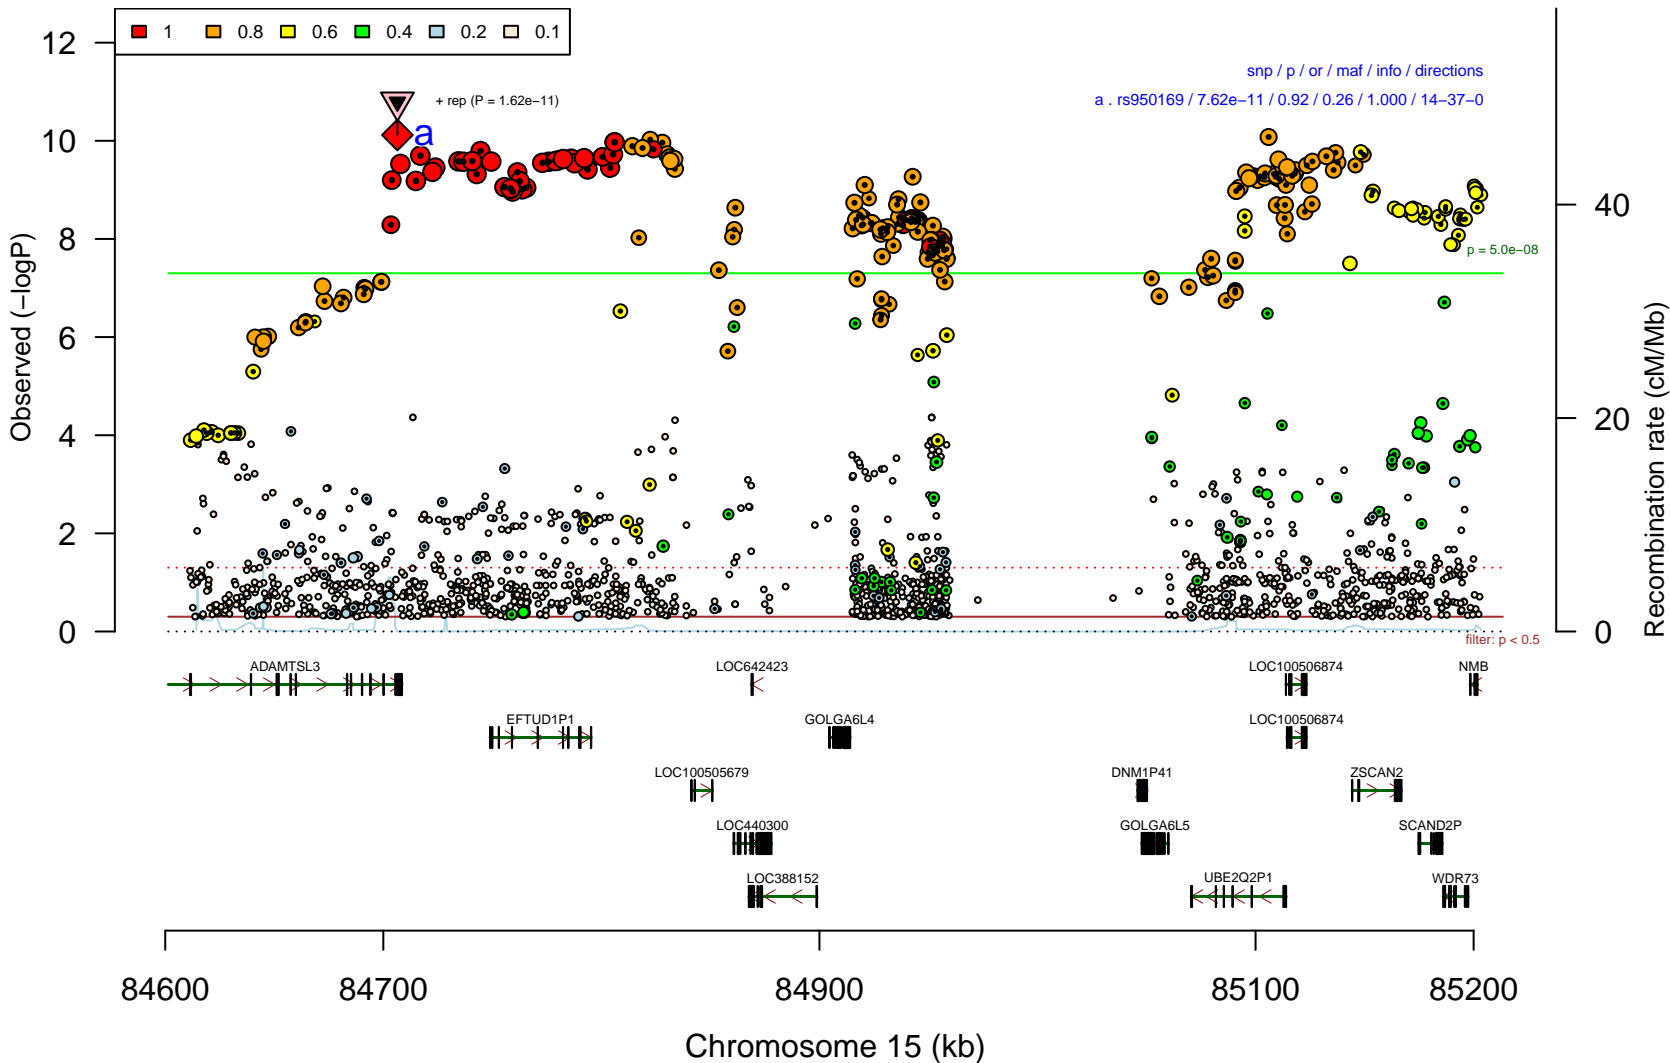

# PGC\_SCZ52.reg30

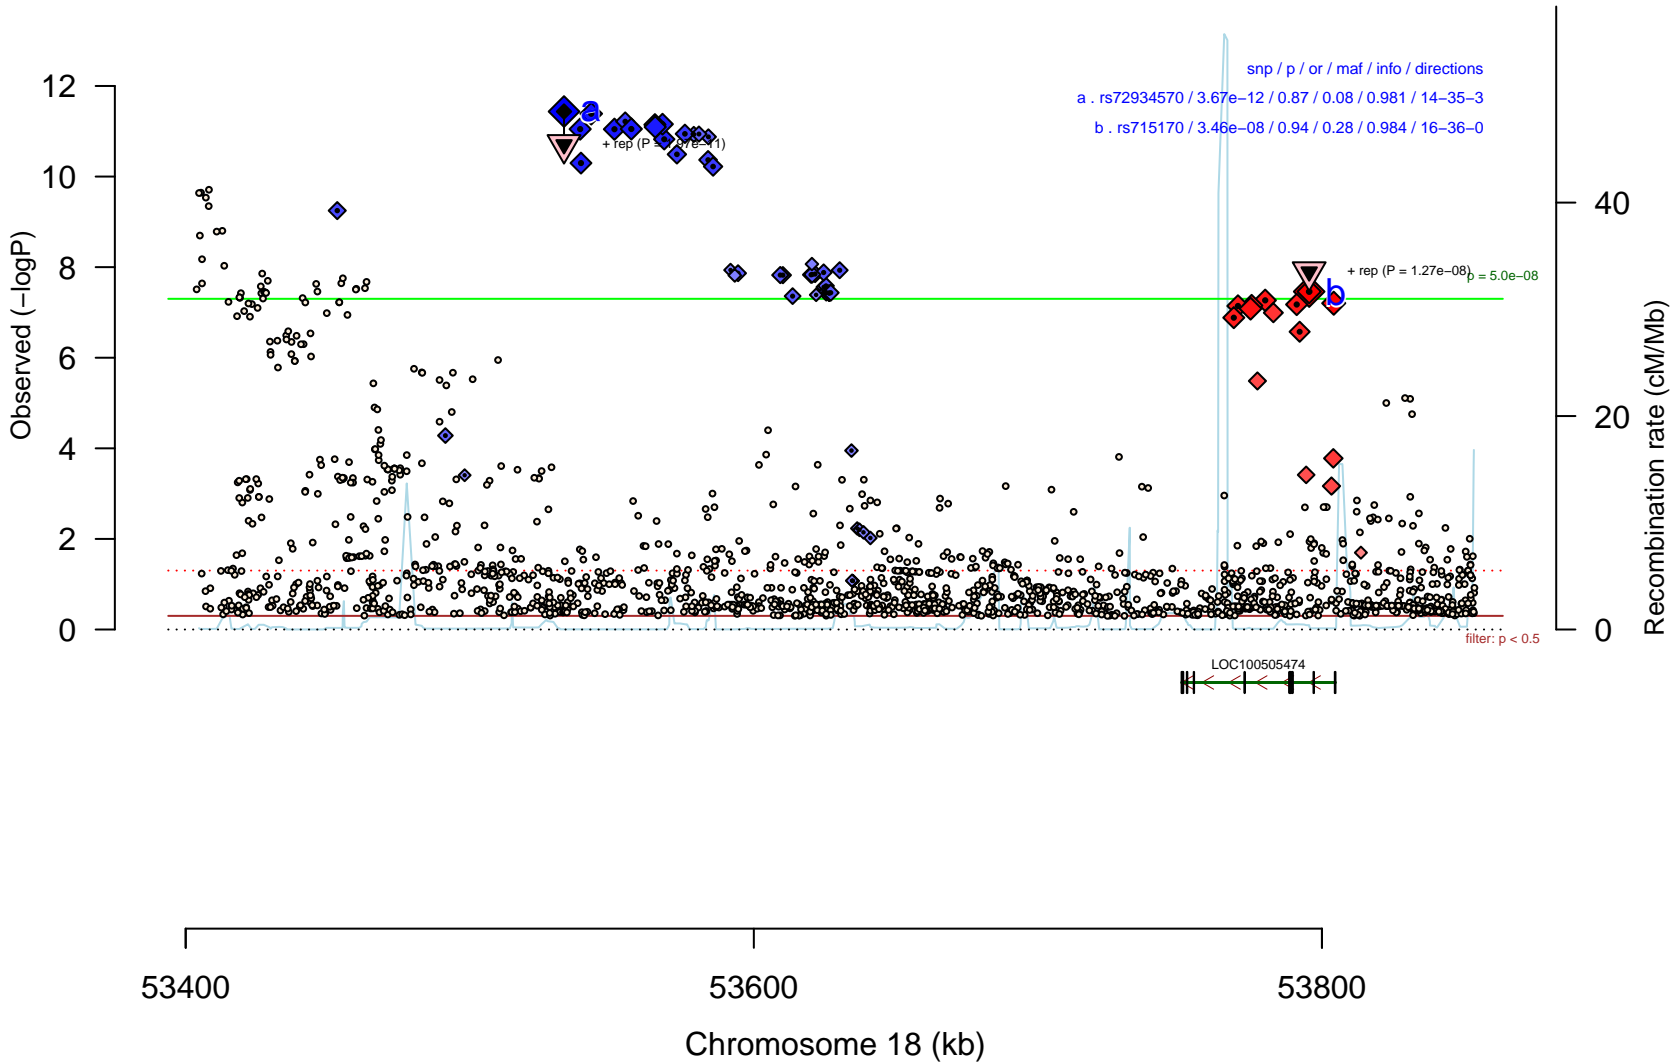

# PGC\_SCZ52.reg31

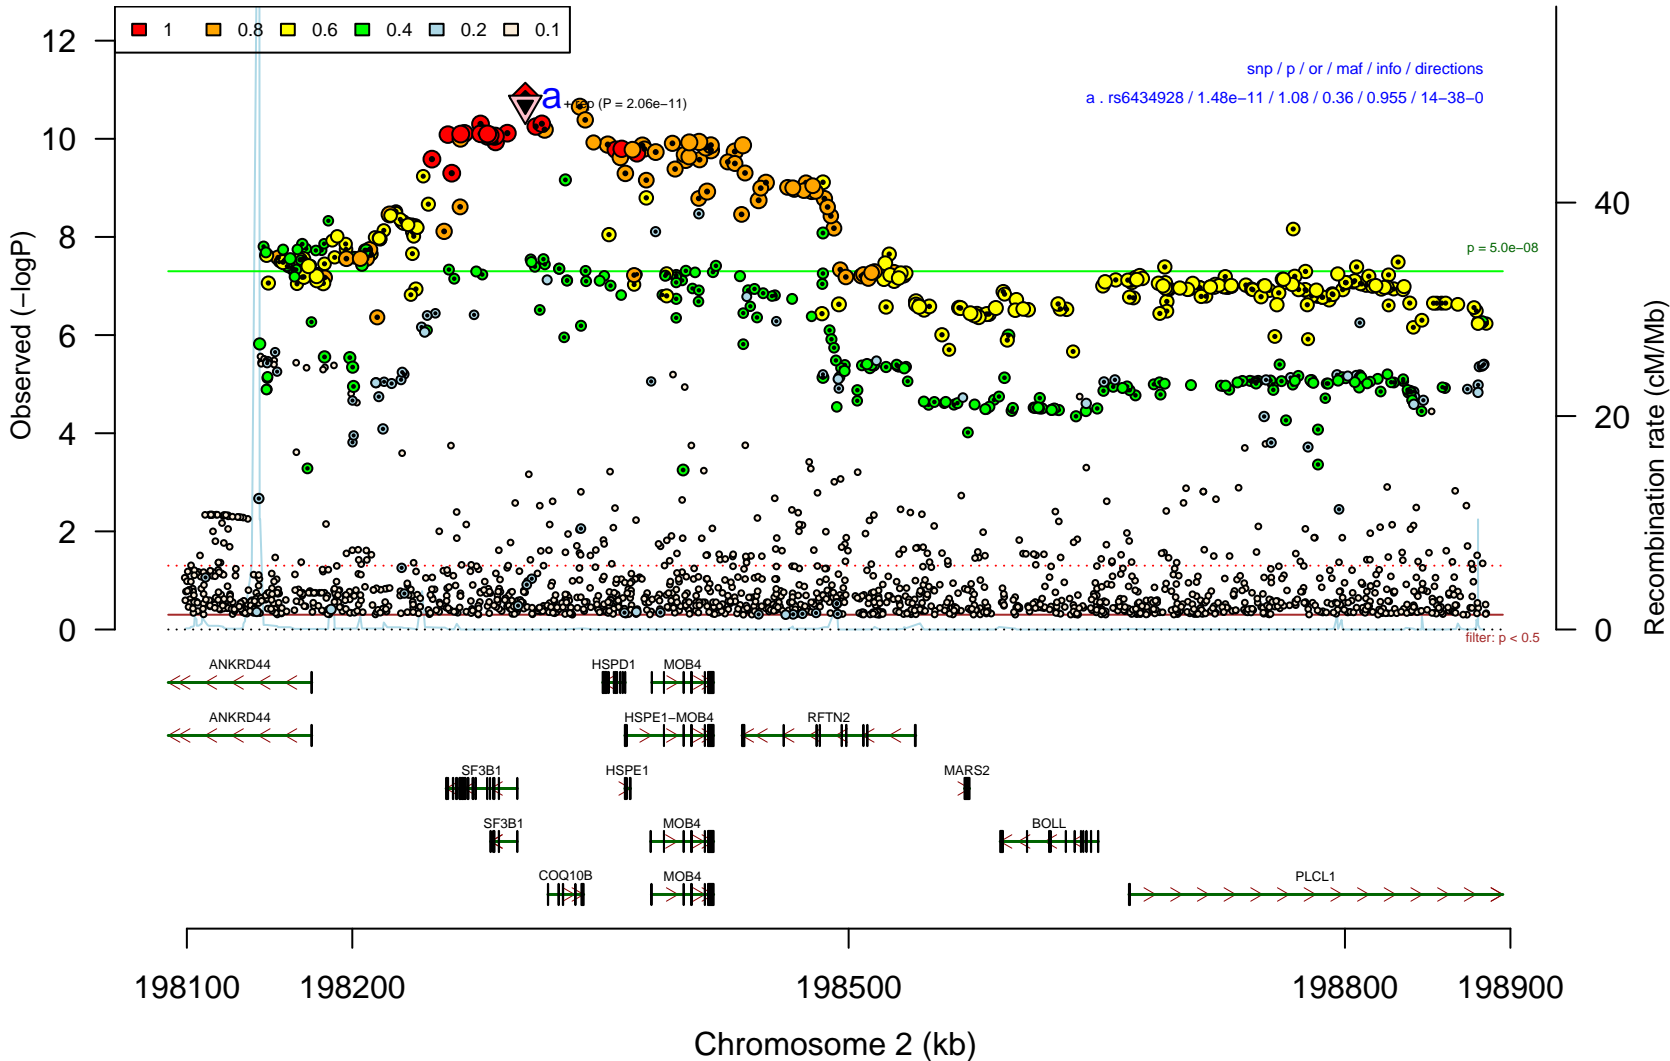

# PGC\_SCZ52.reg32

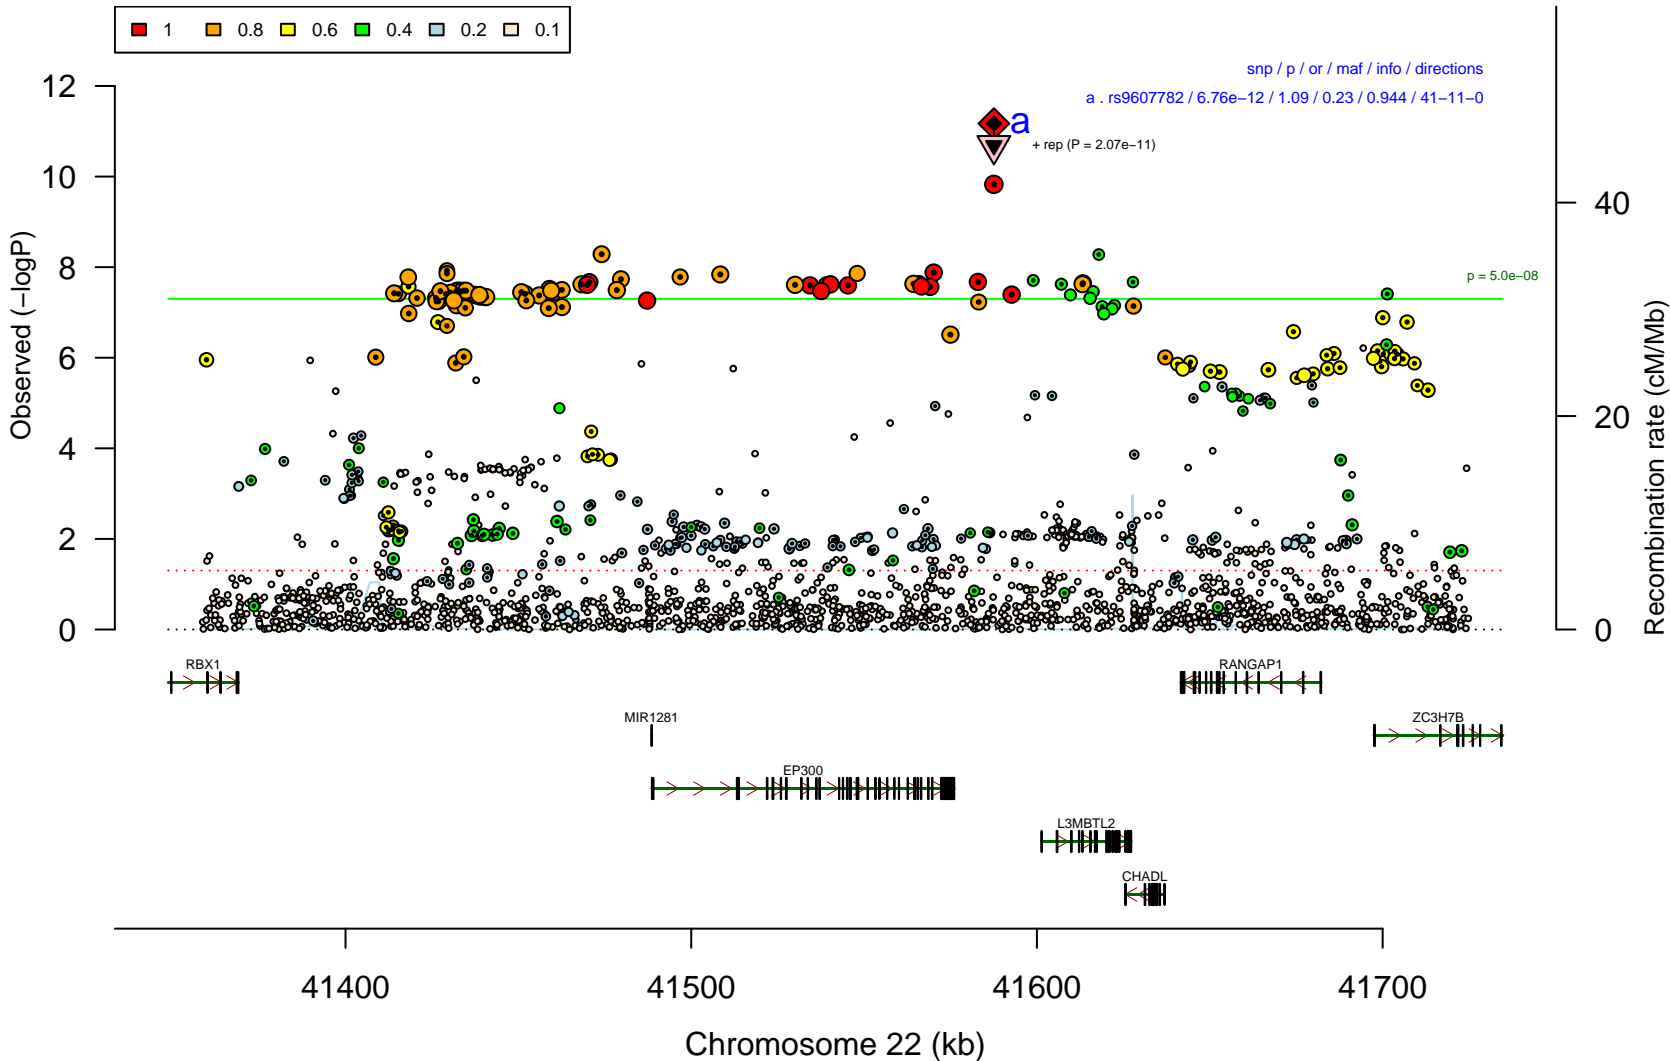



# PGC\_SCZ52.reg33

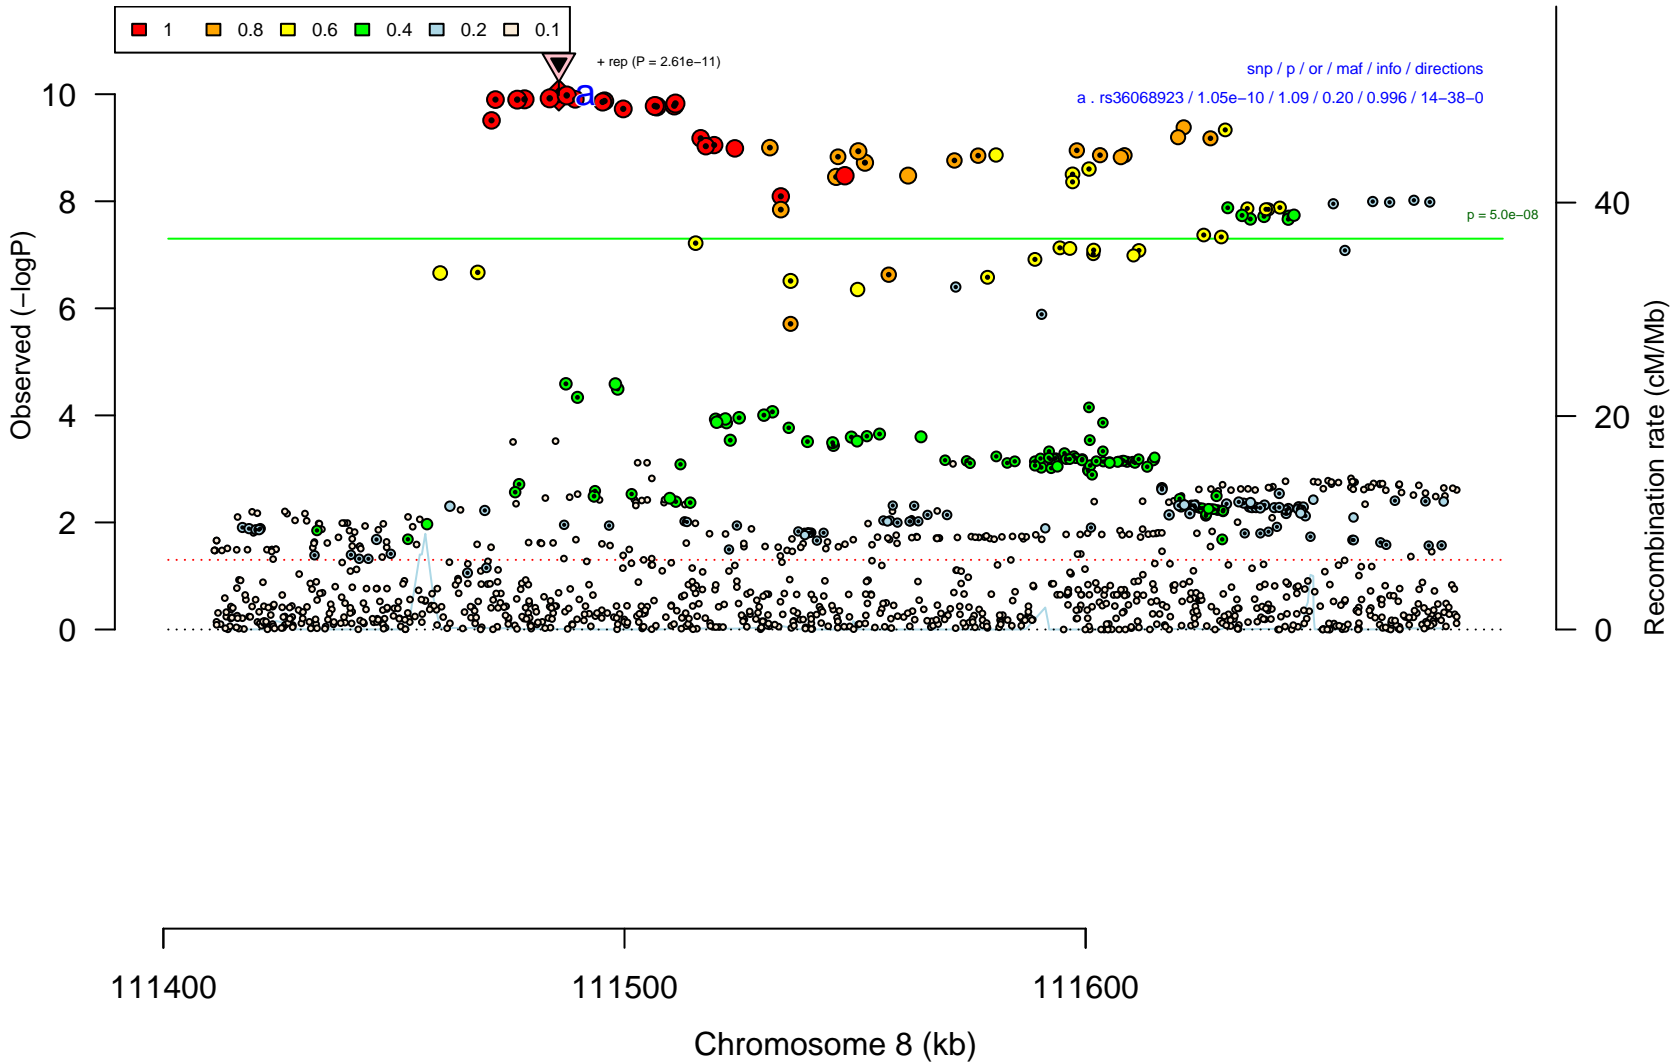

# PGC\_SCZ52.reg34

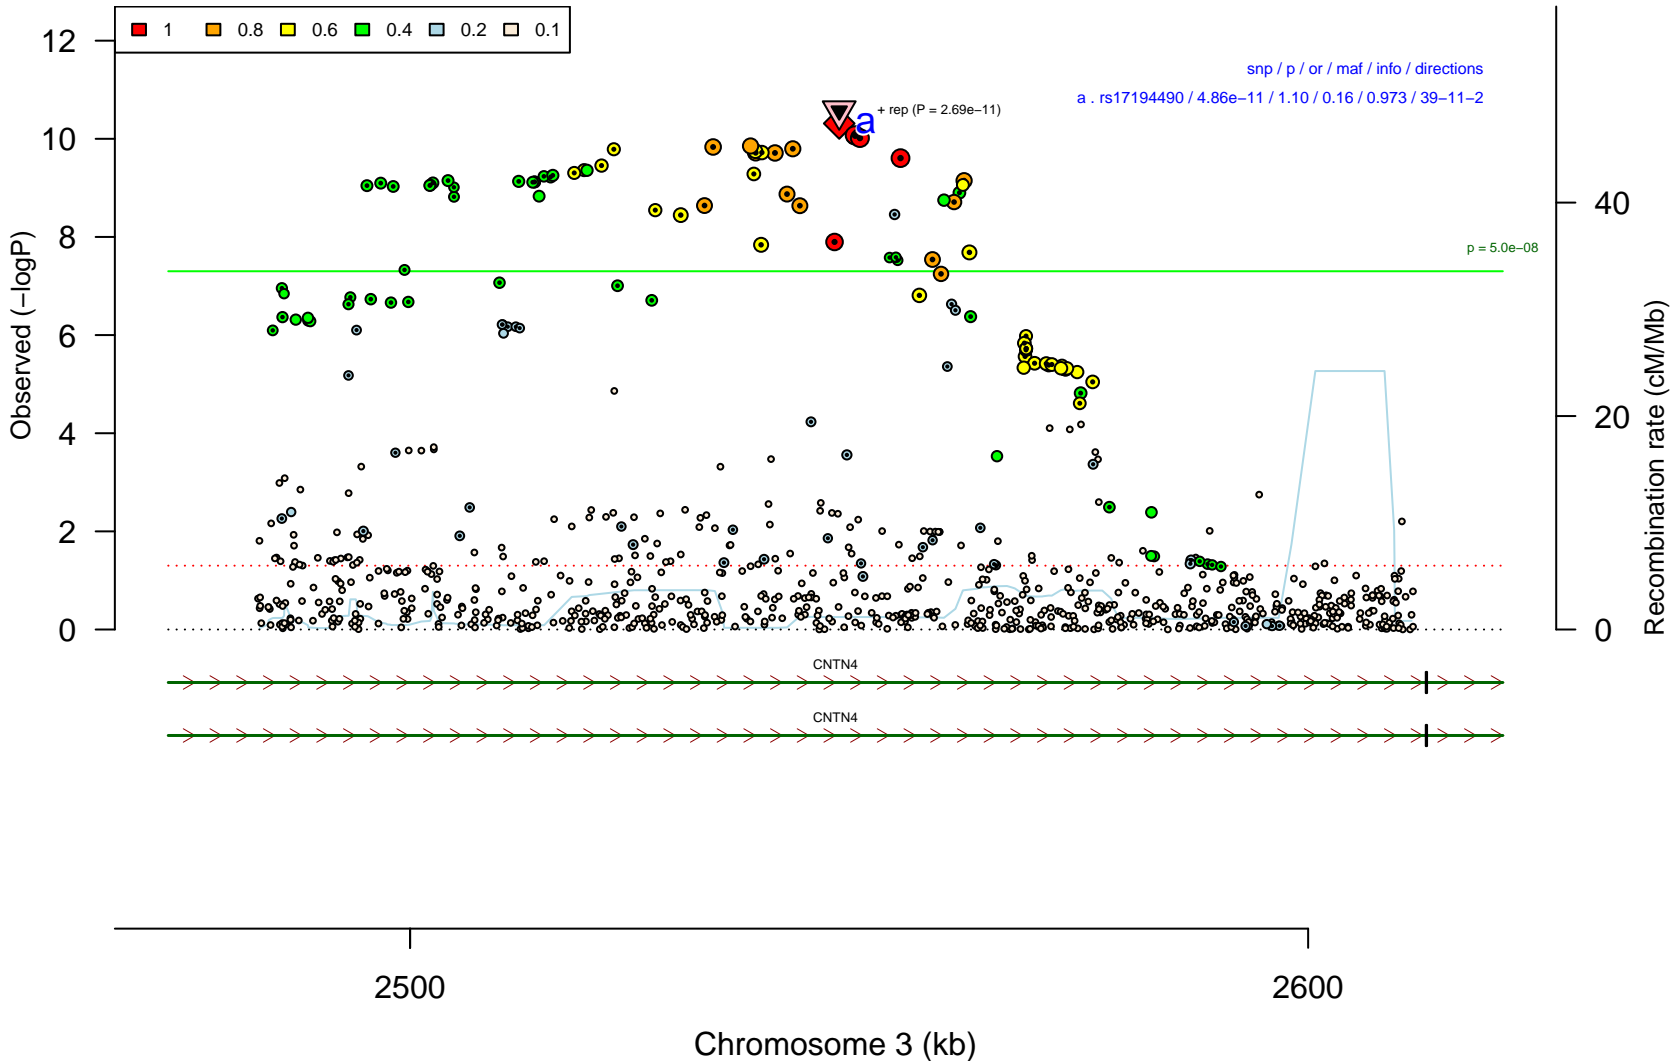

# PGC\_SCZ52.reg35

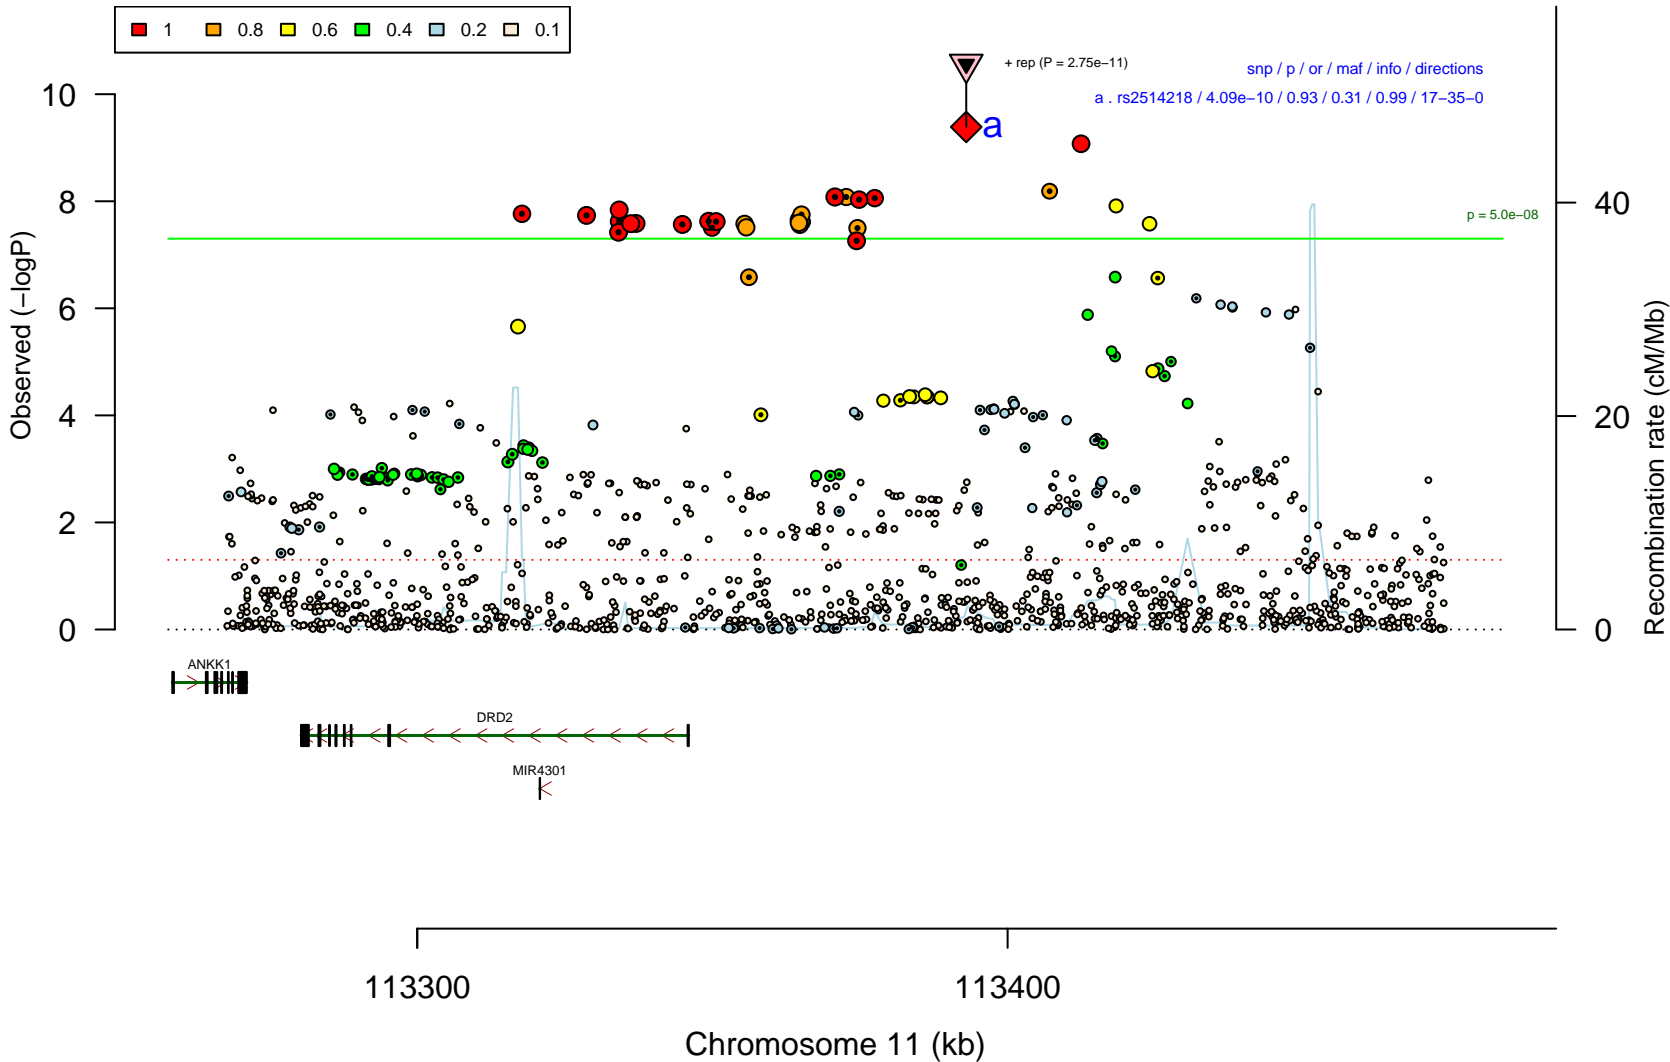

# PGC\_SCZ52.reg36

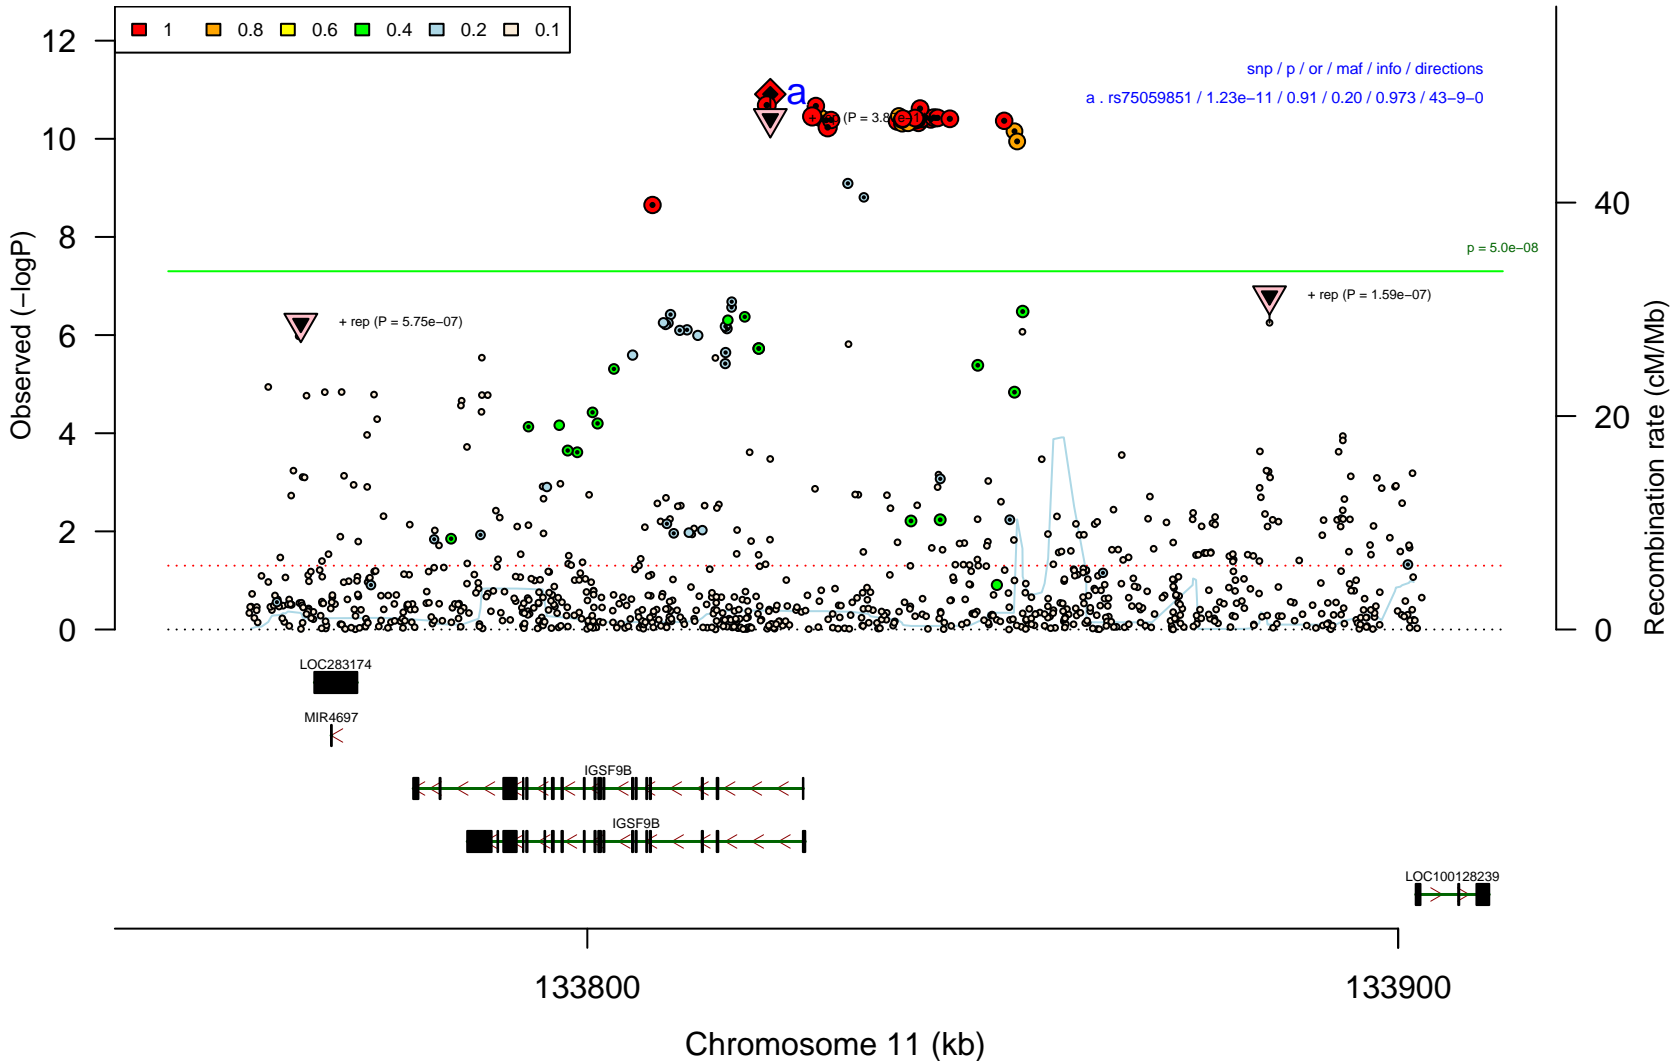

# PGC\_SCZ52.reg37

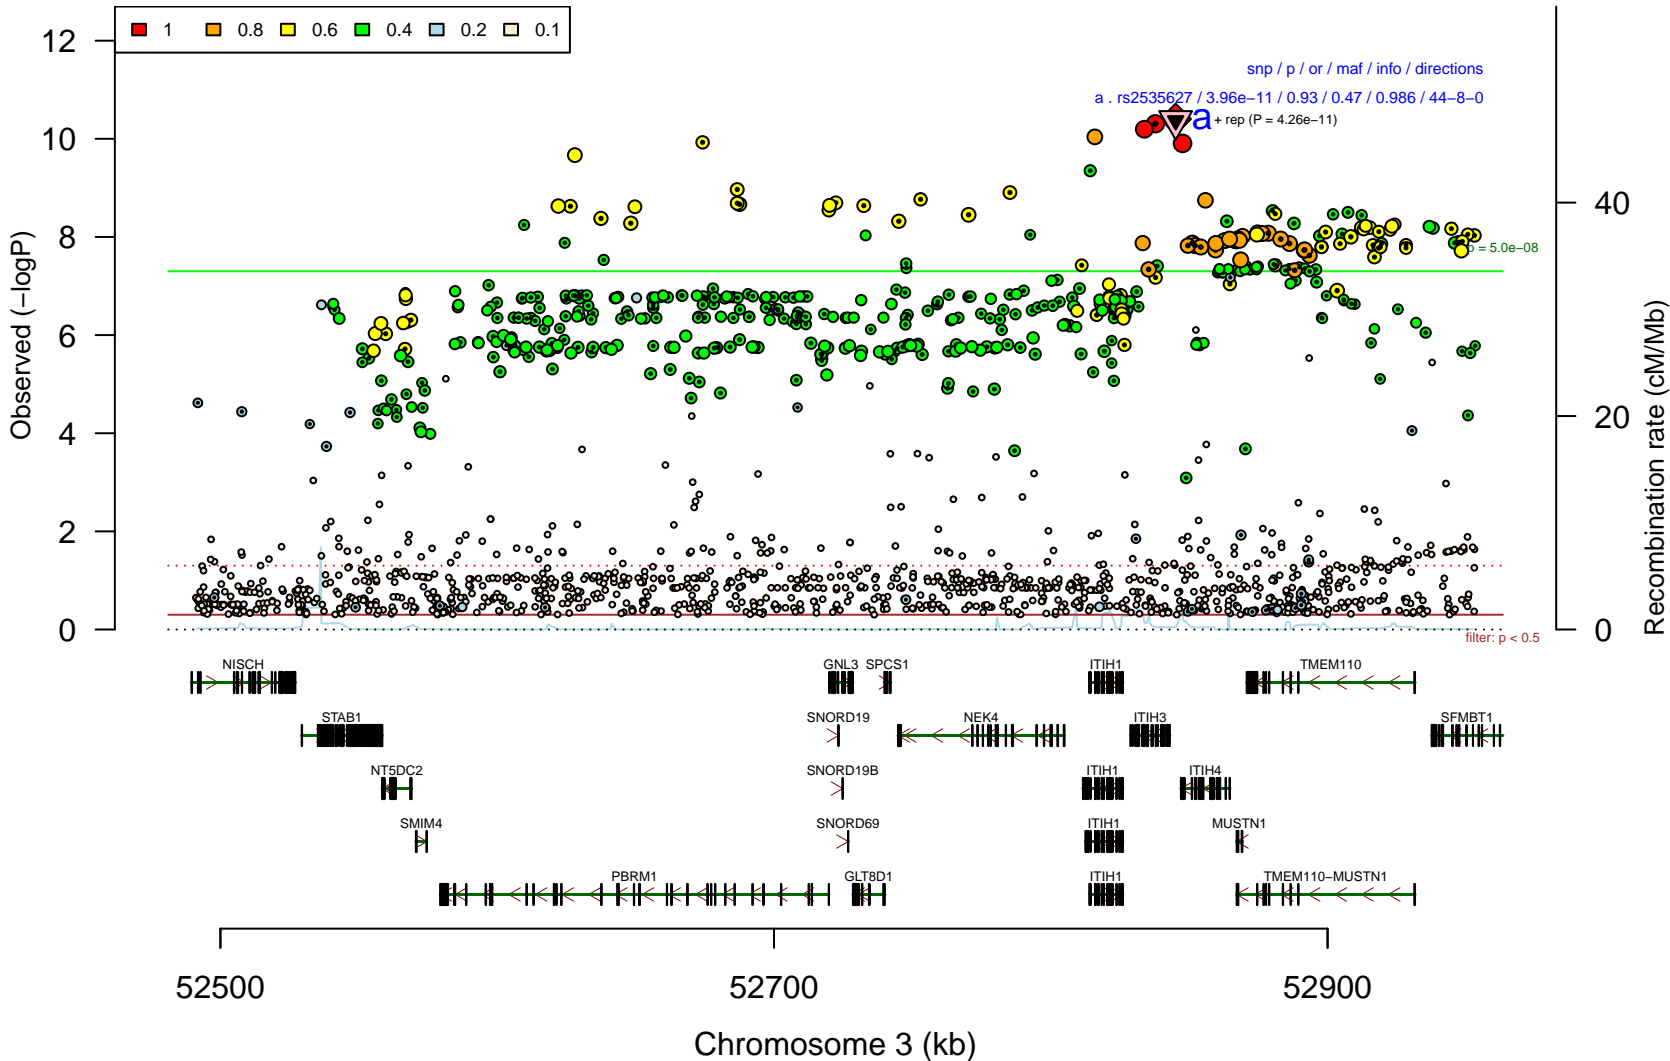

# PGC\_SCZ52.reg38

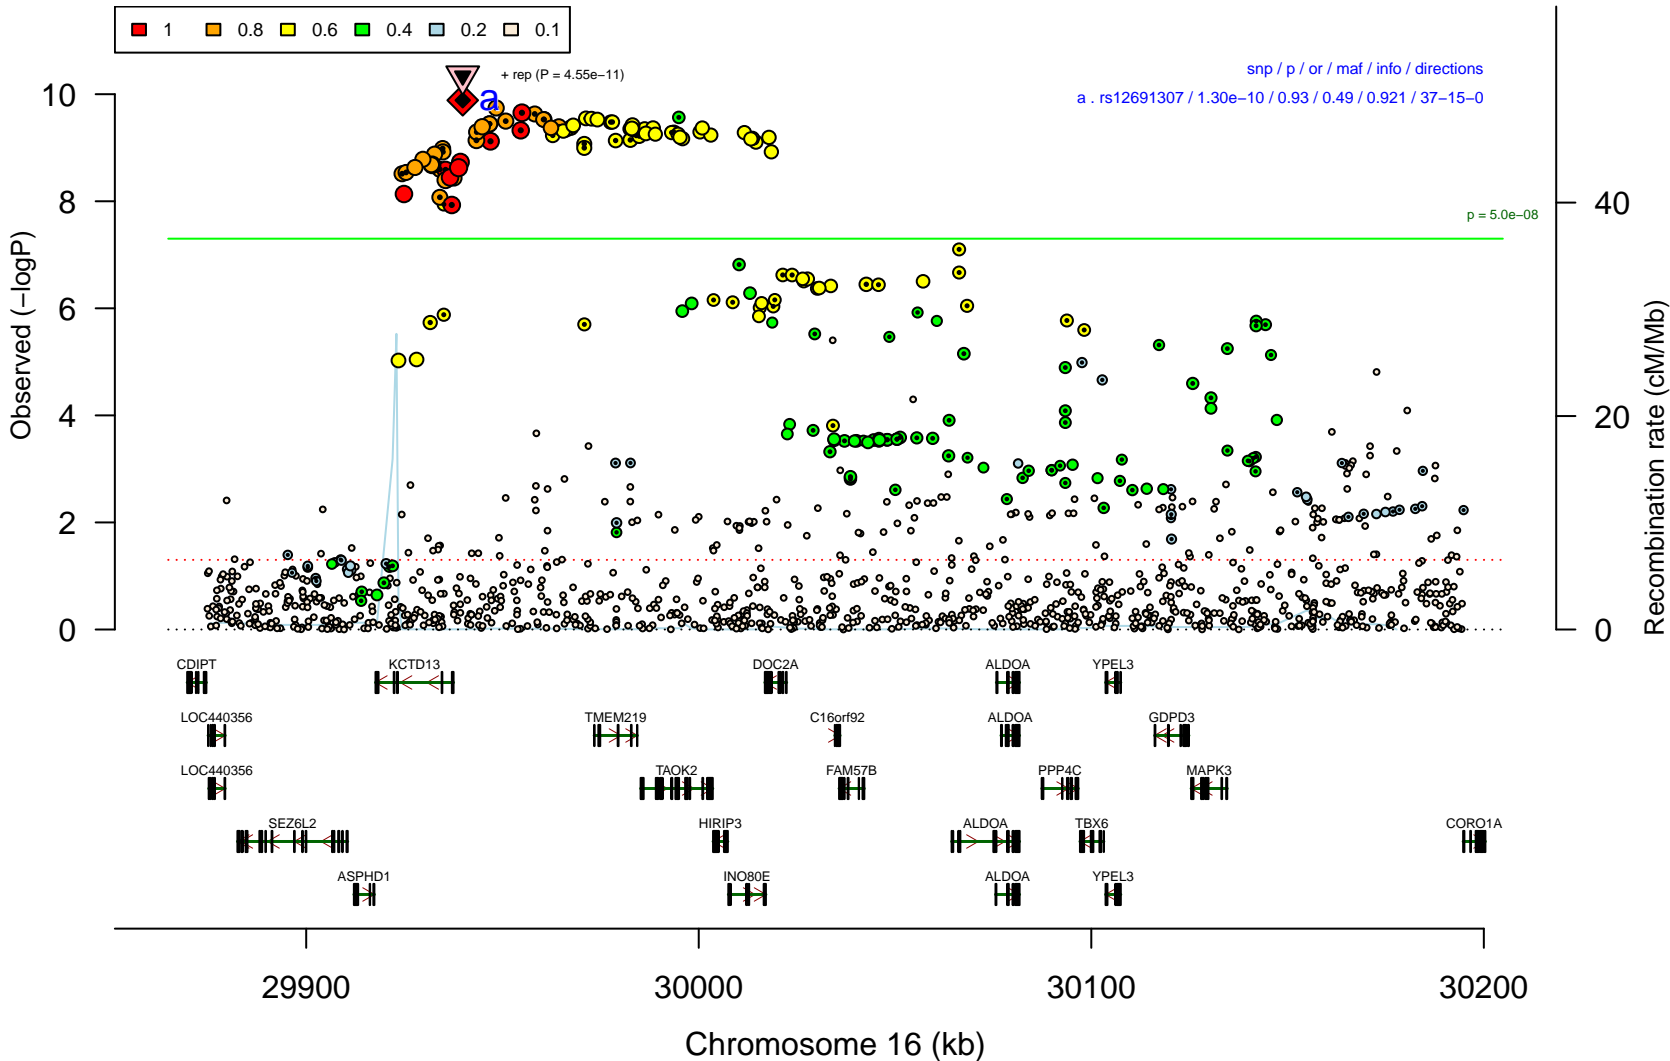

# PGC\_SCZ52.reg39

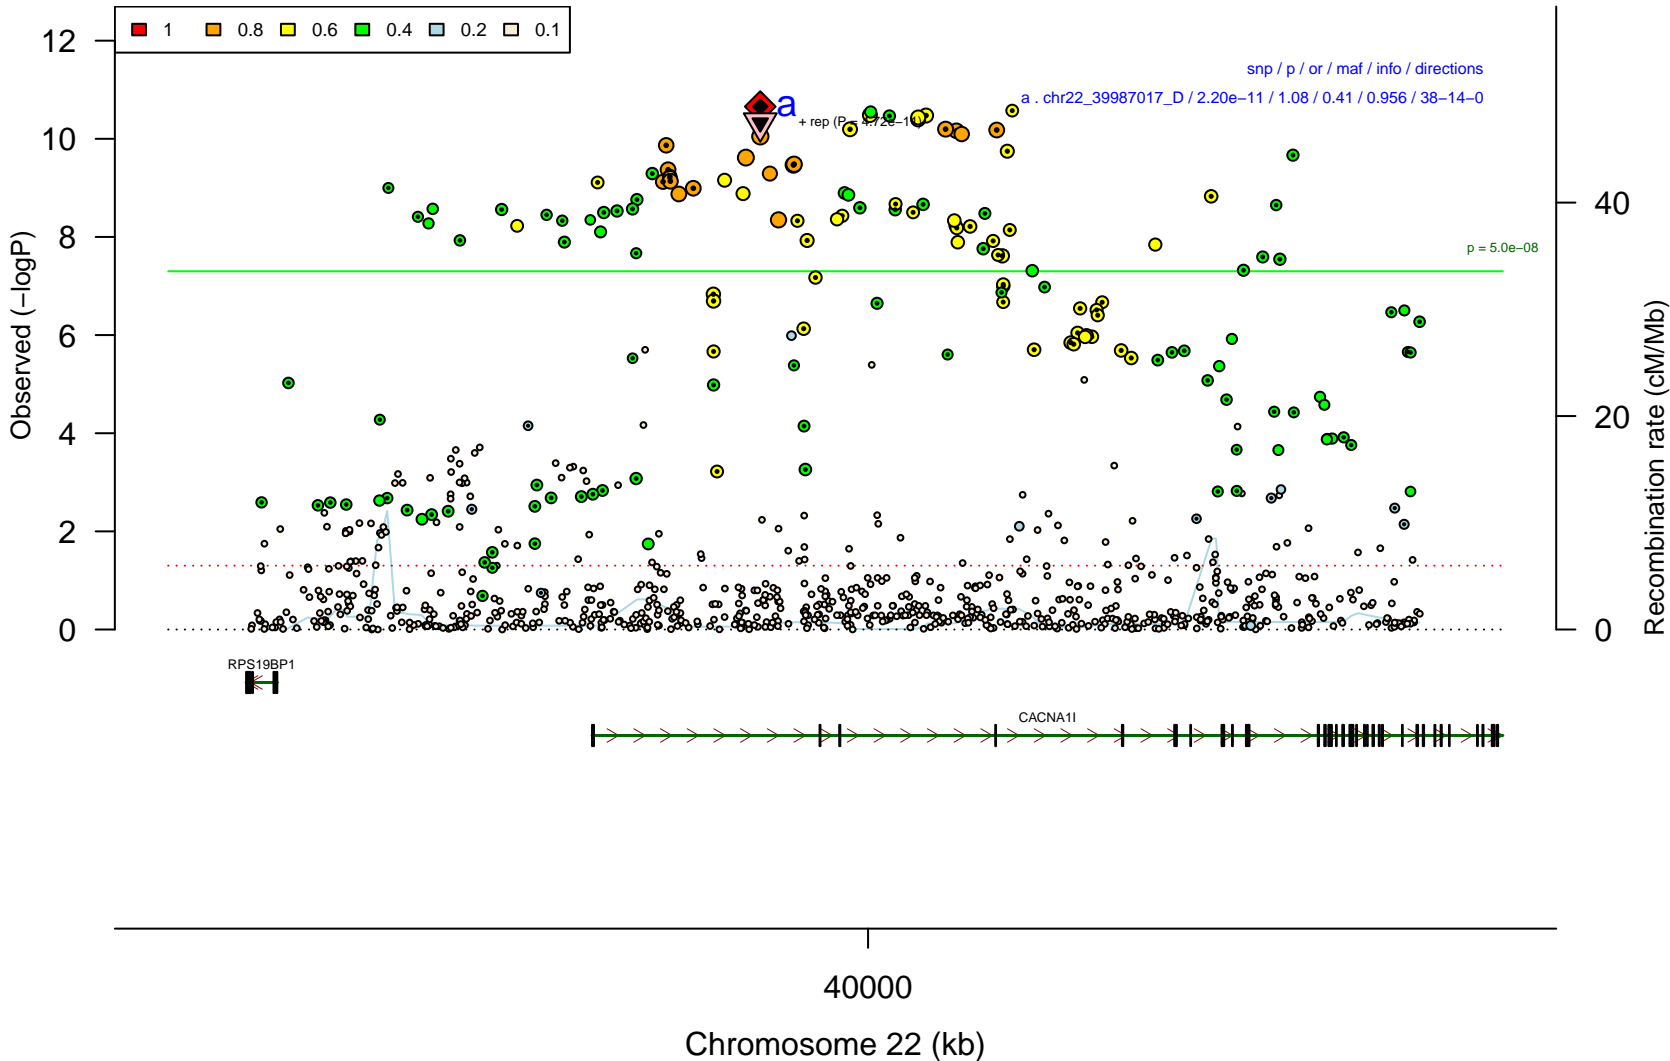

# PGC\_SCZ52.reg40

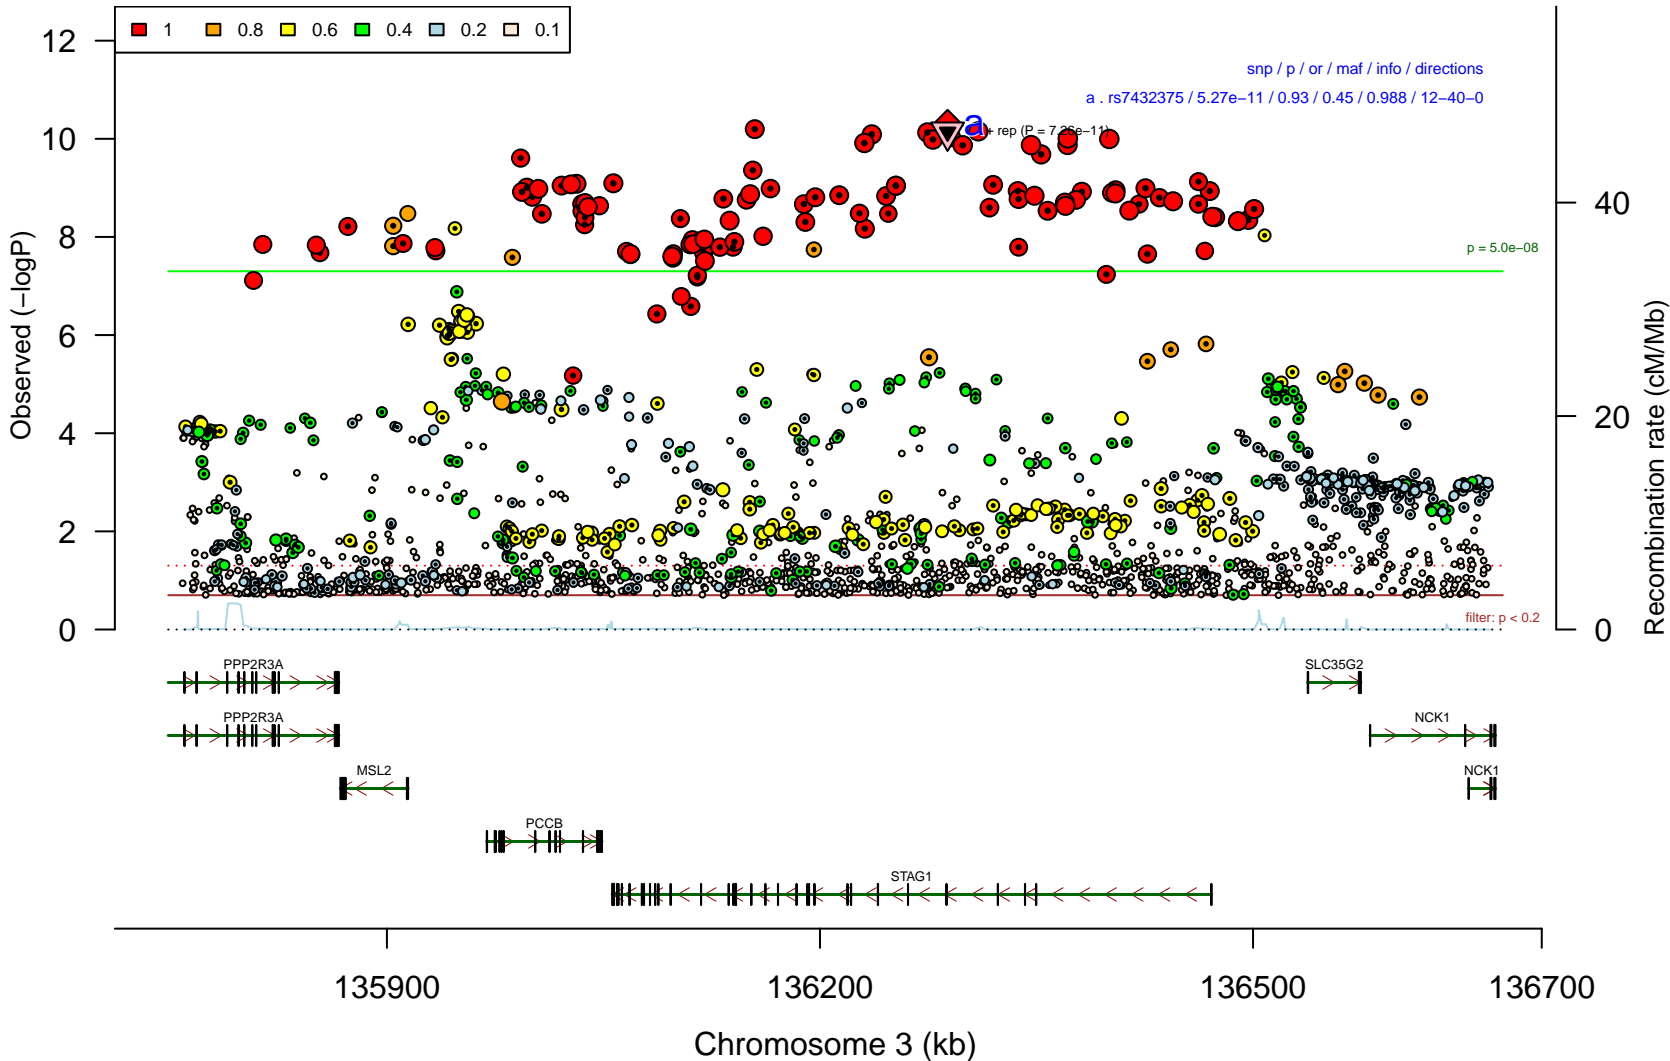



# PGC\_SCZ52.reg41

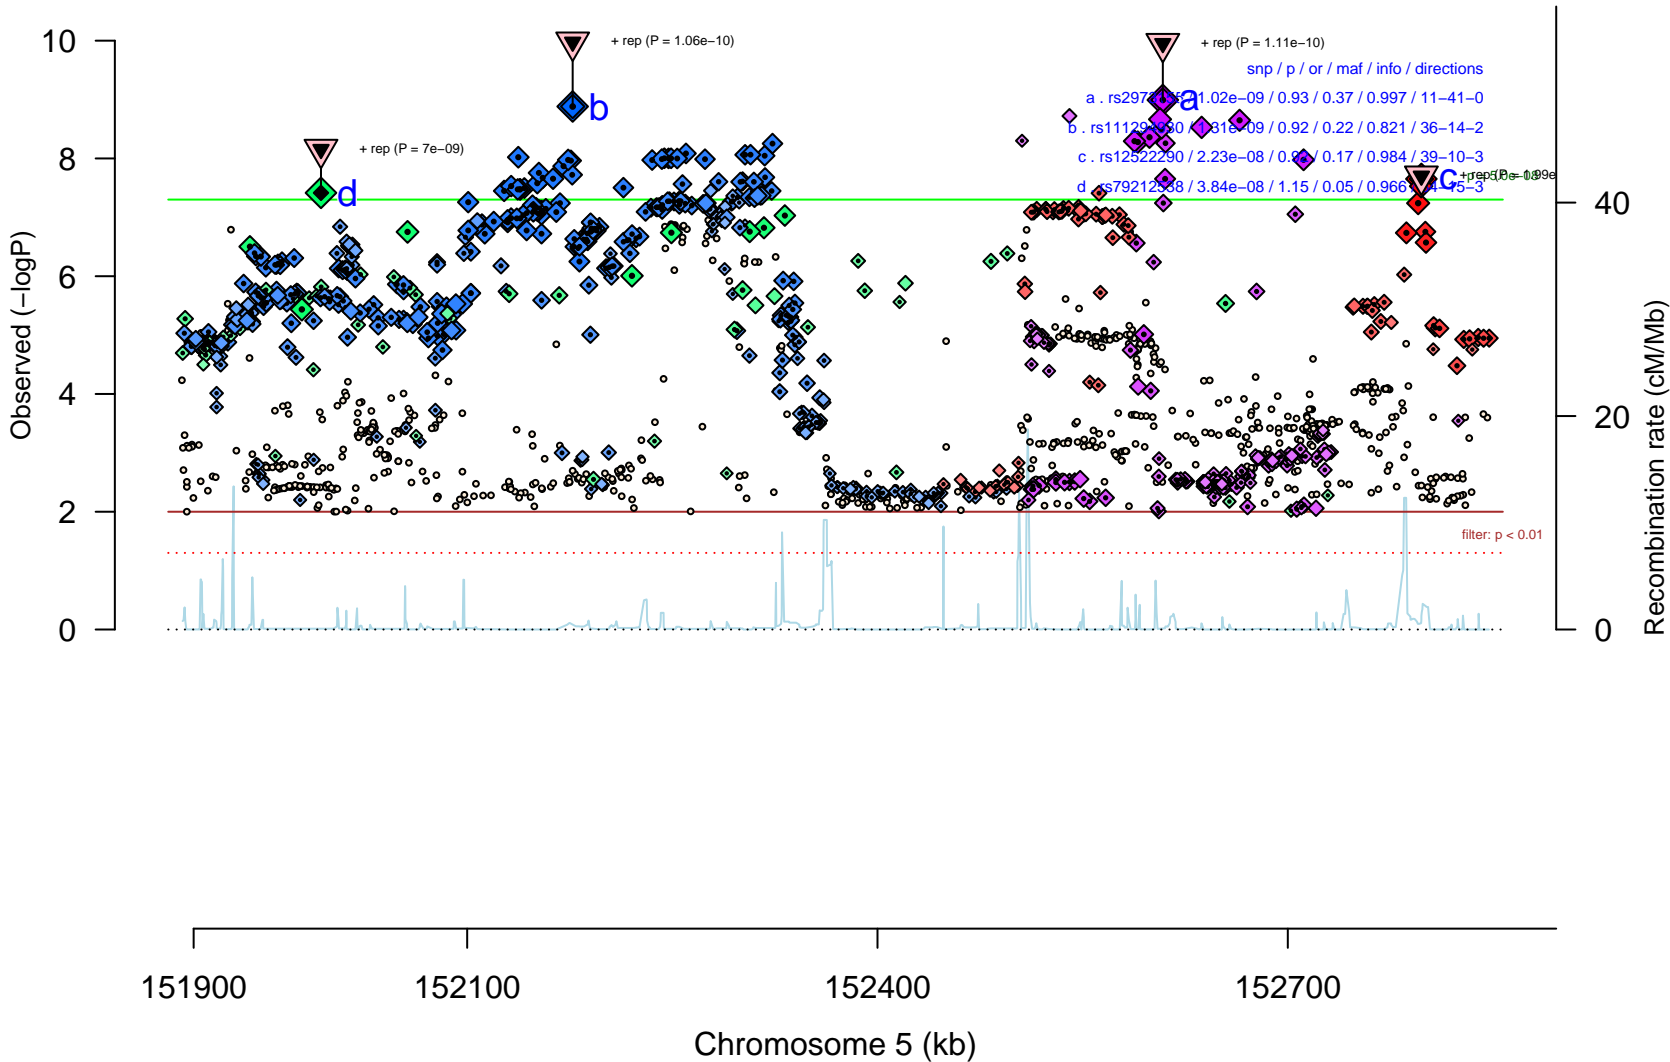

# PGC\_SCZ52.reg42

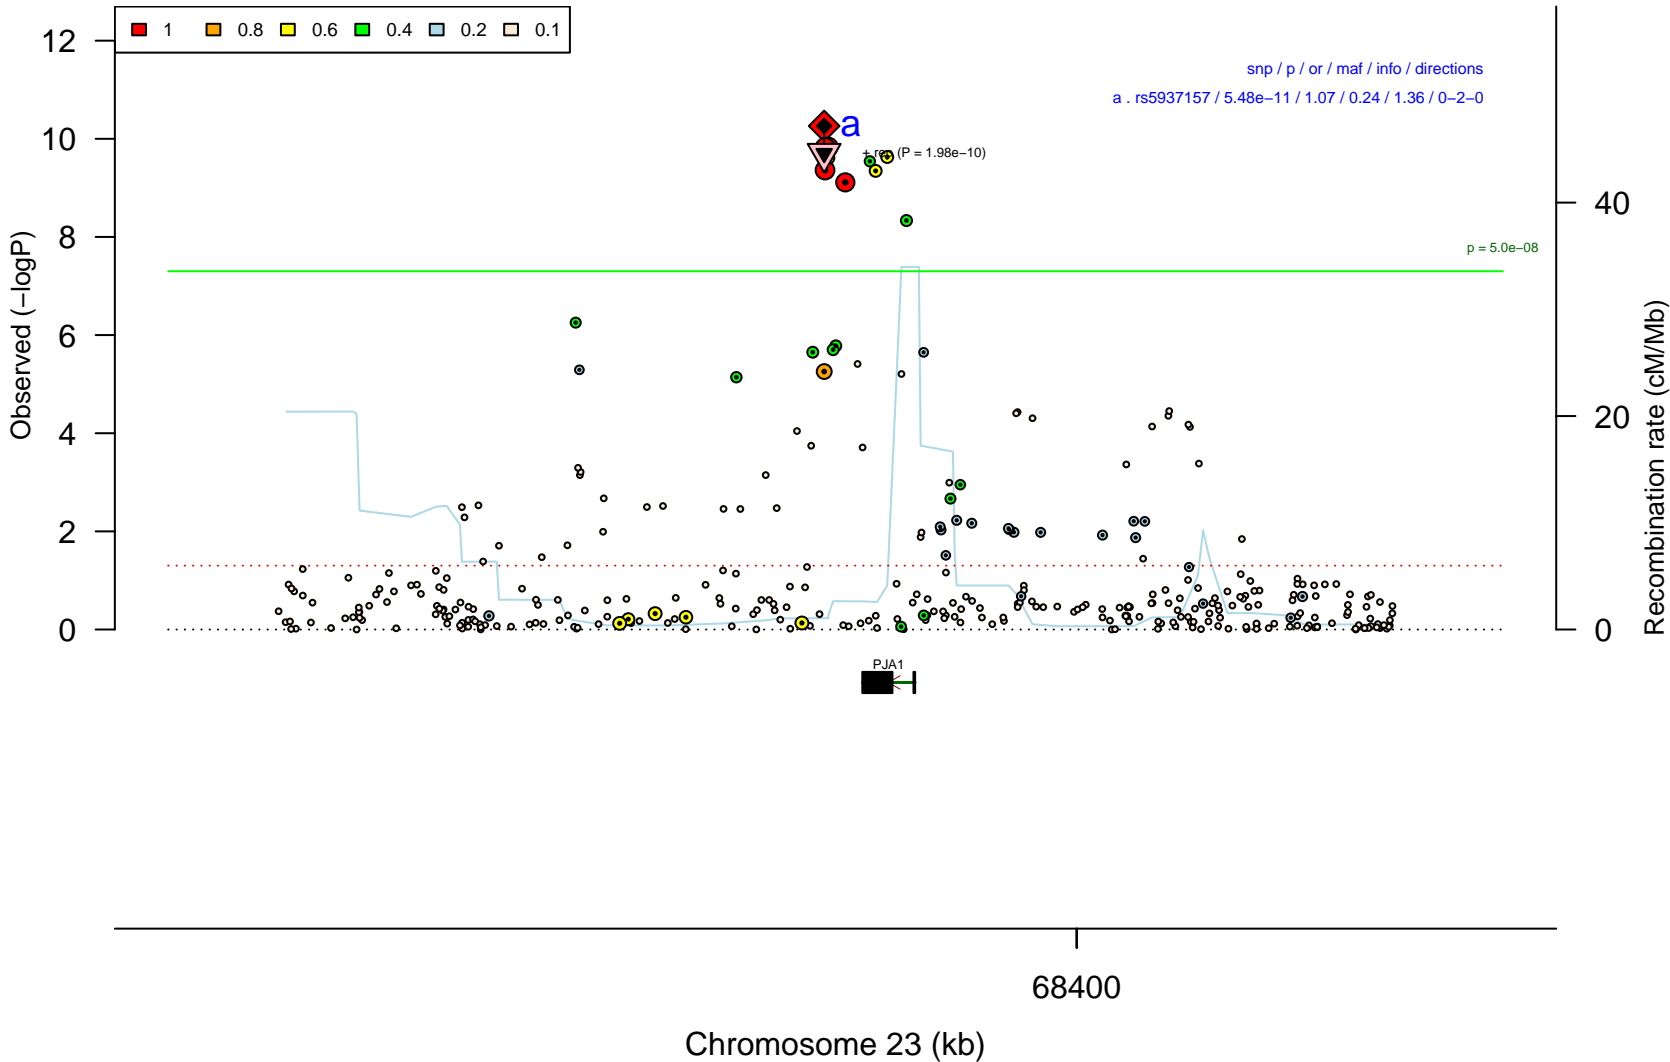

# PGC\_SCZ52.reg43

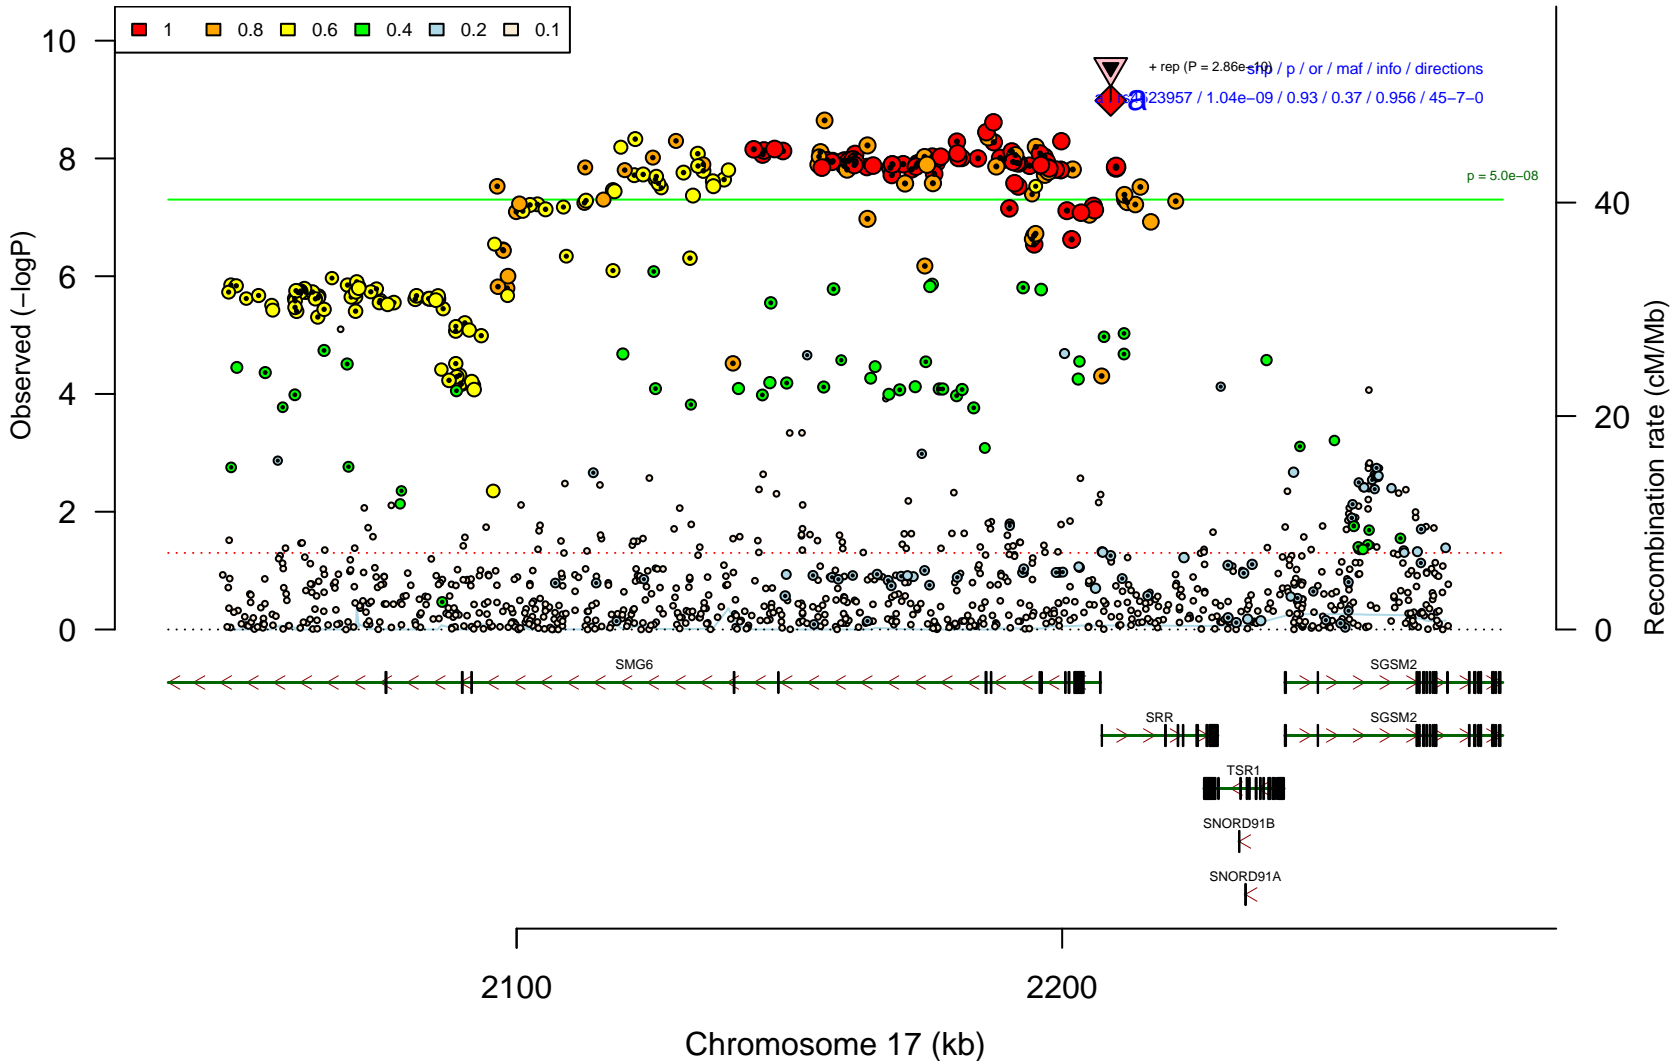

# PGC\_SCZ52.reg44

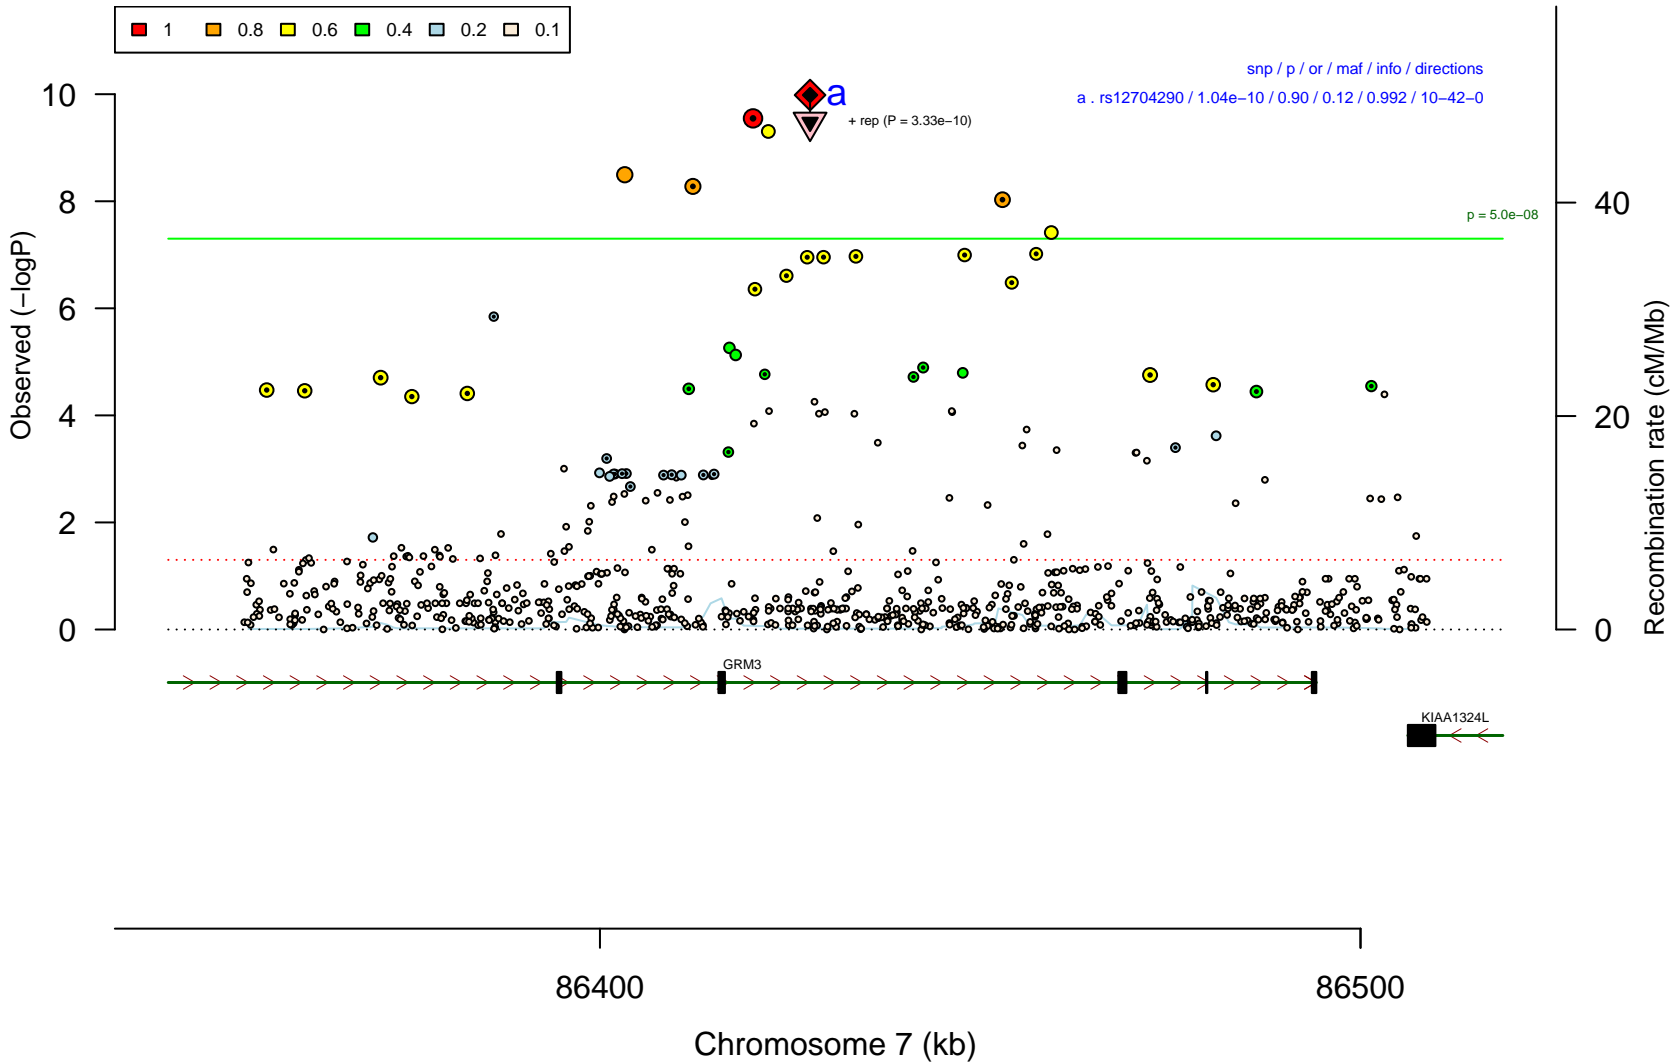

# PGC\_SCZ52.reg45

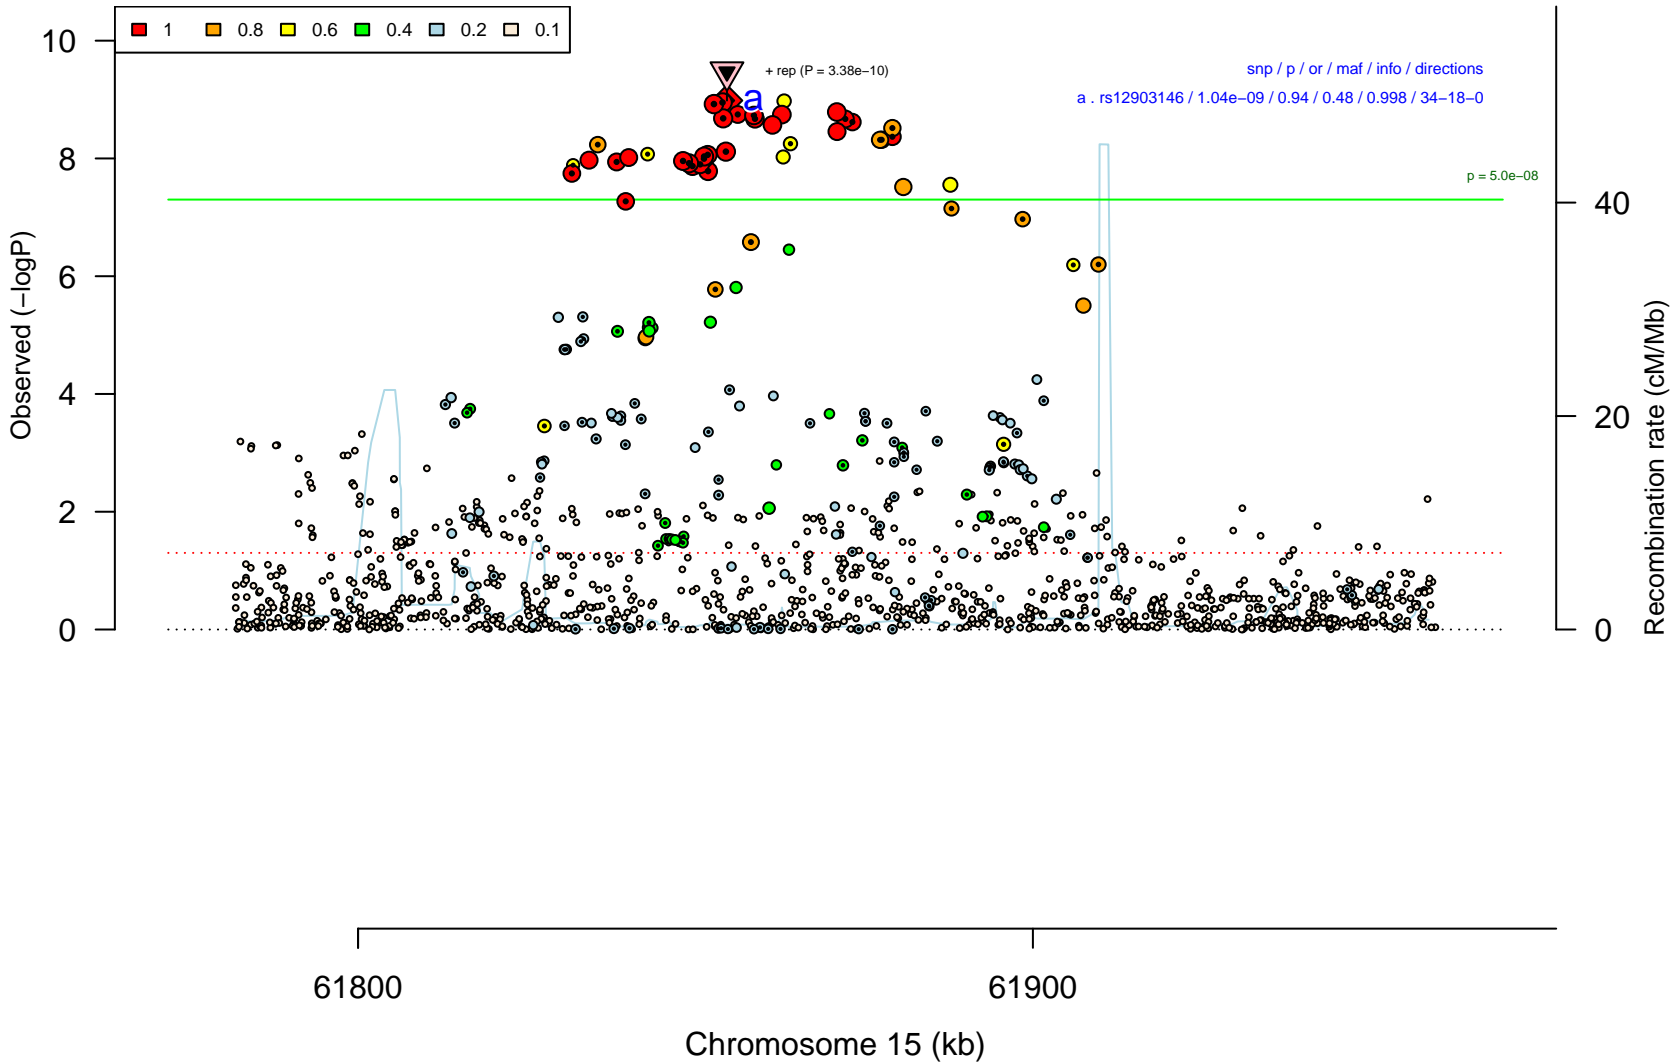

# PGC\_SCZ52.reg46

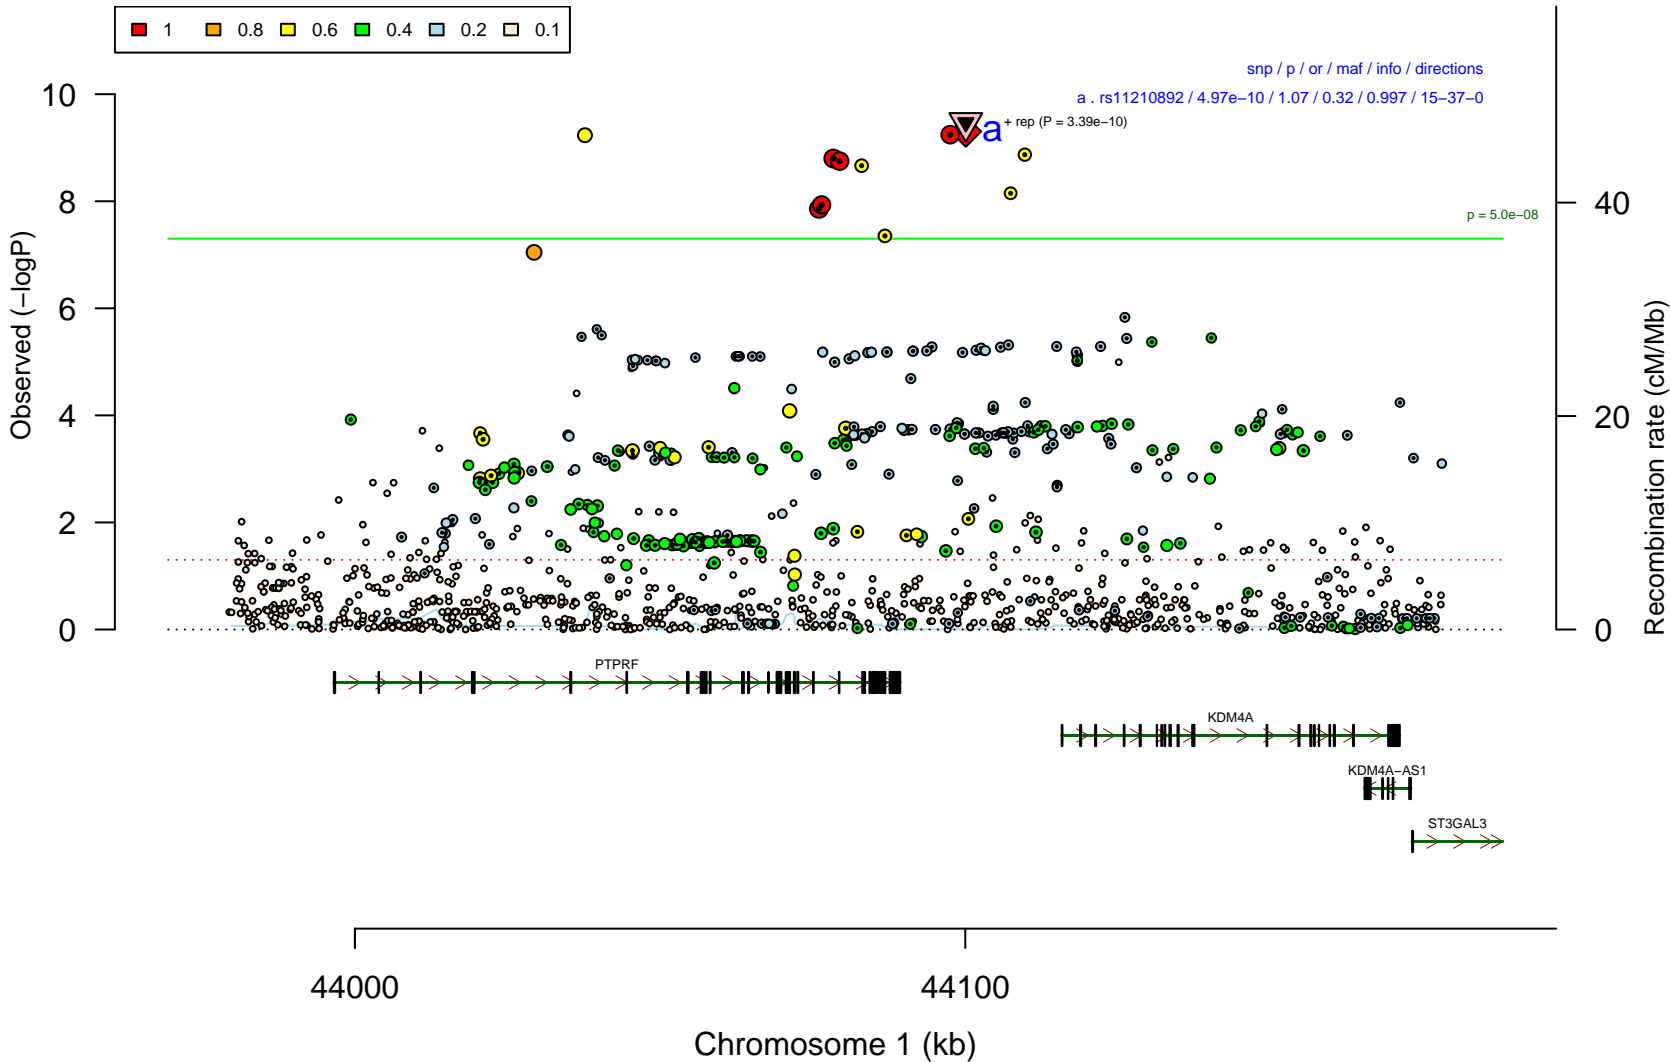

# PGC\_SCZ52.reg47

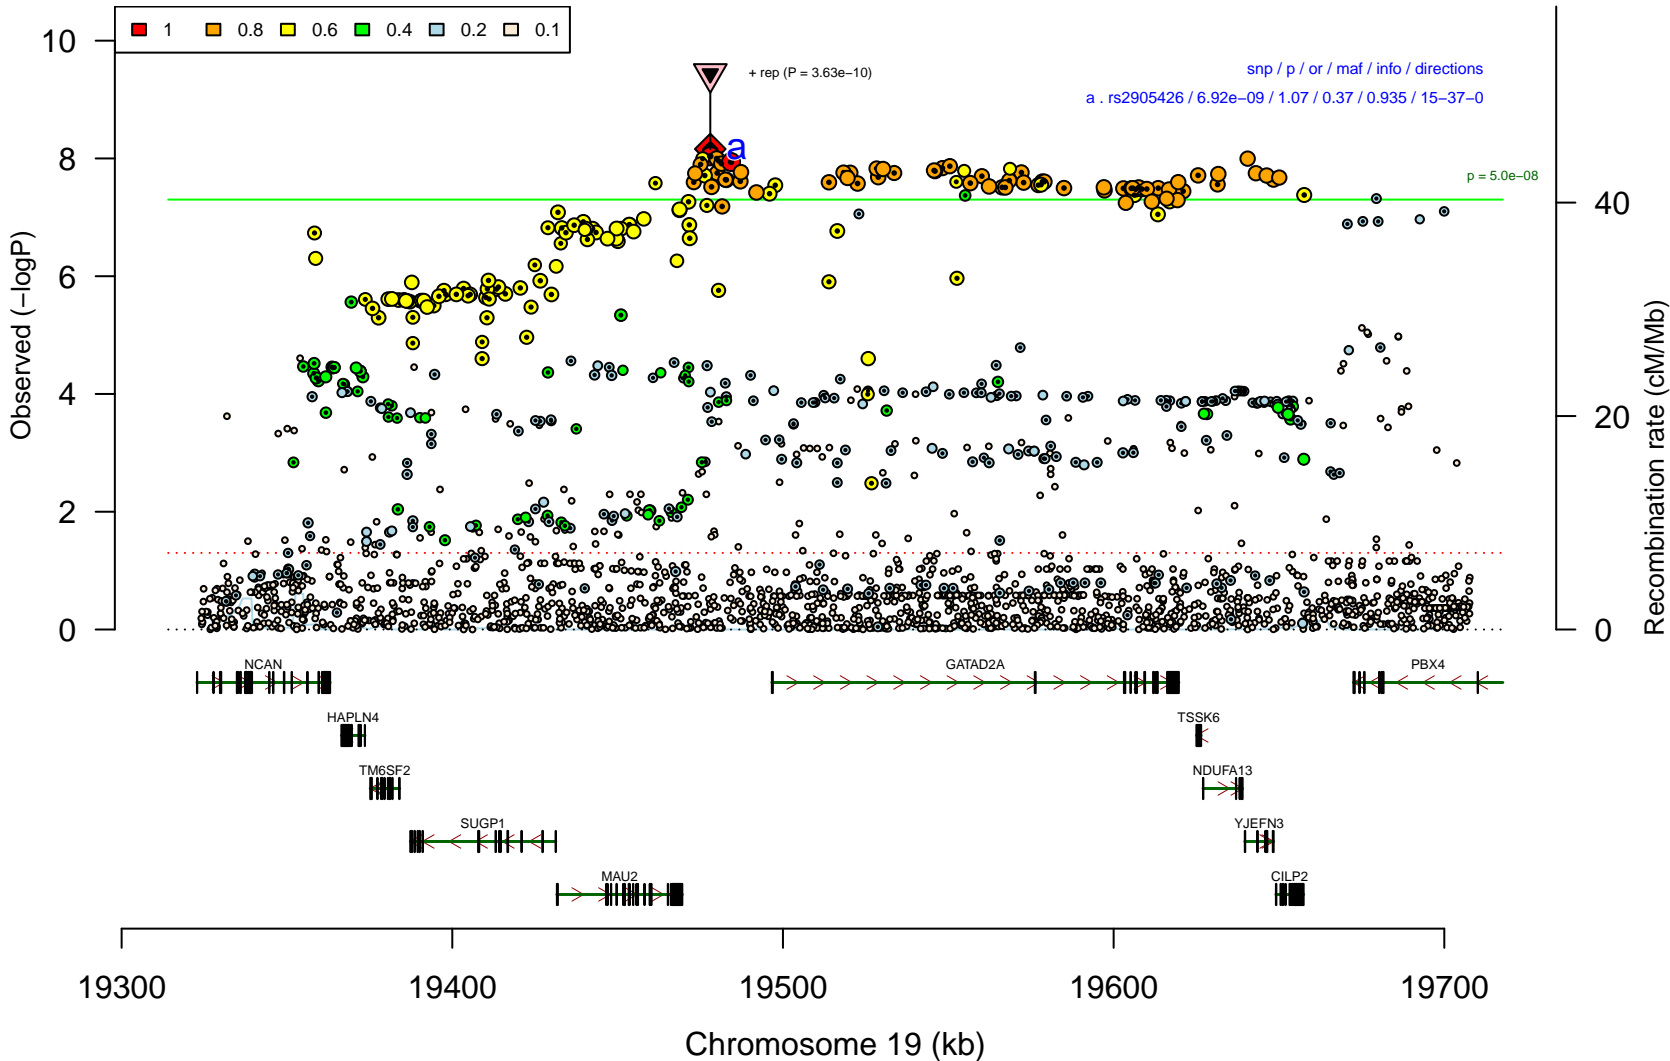

# PGC\_SCZ52.reg48

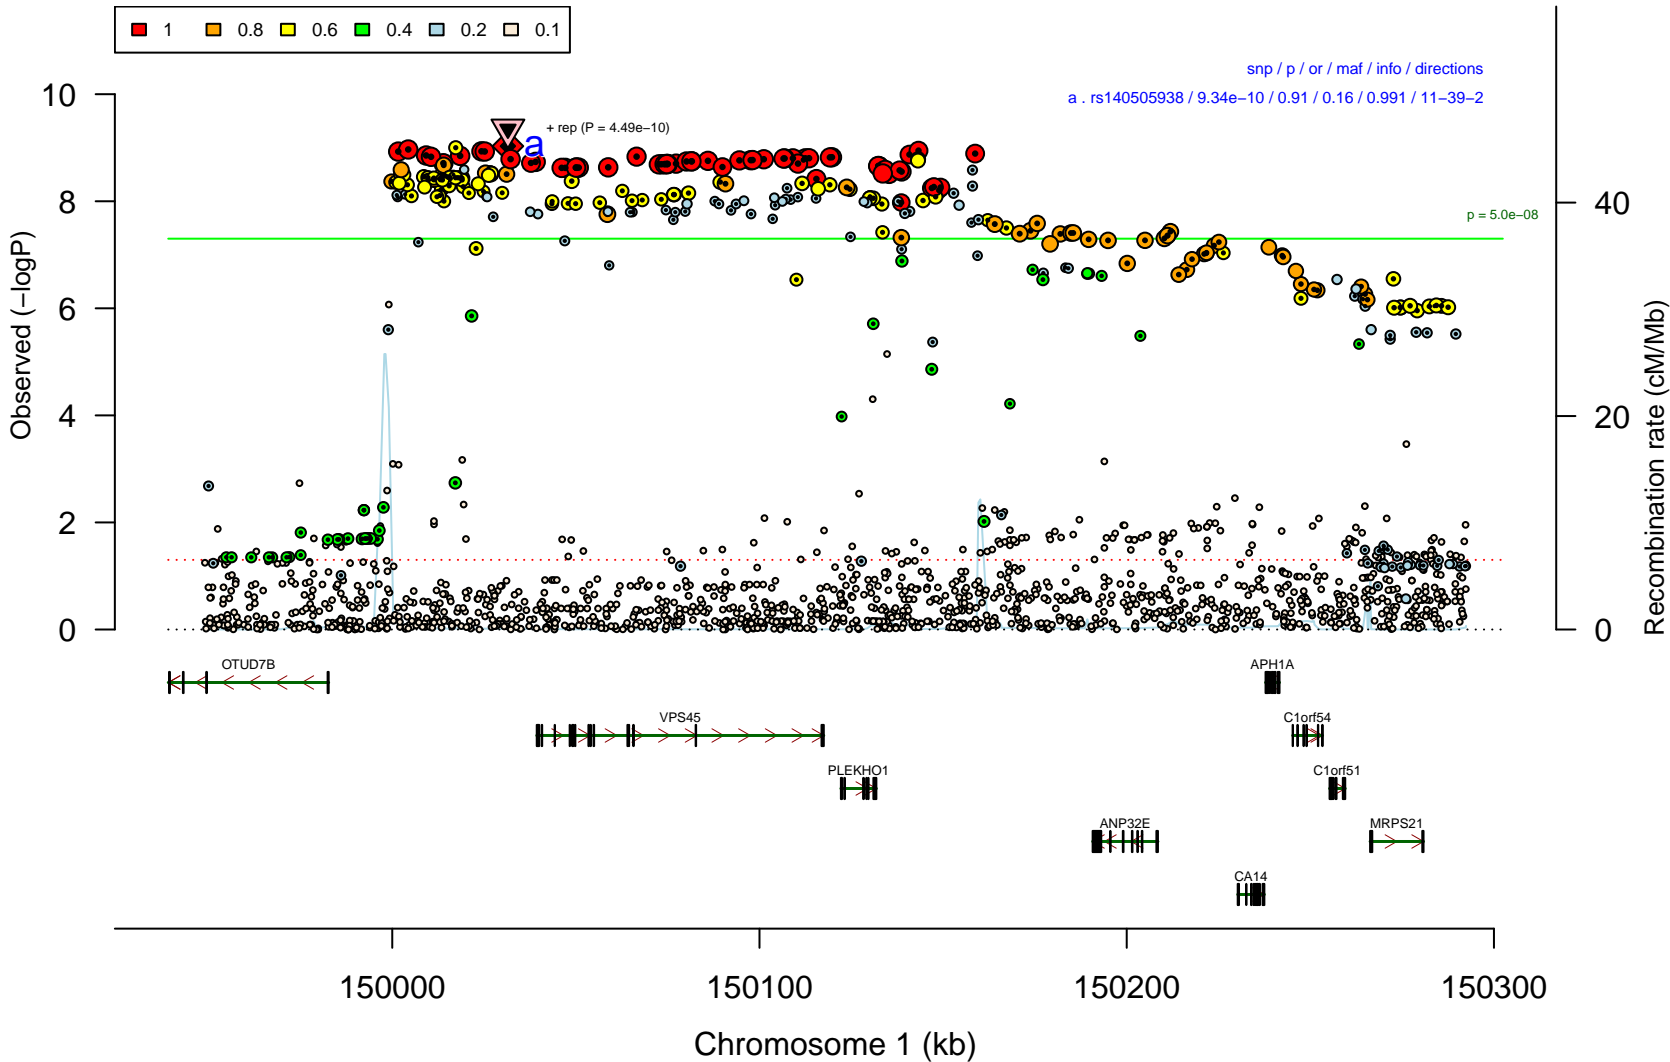



# PGC\_SCZ52.reg49

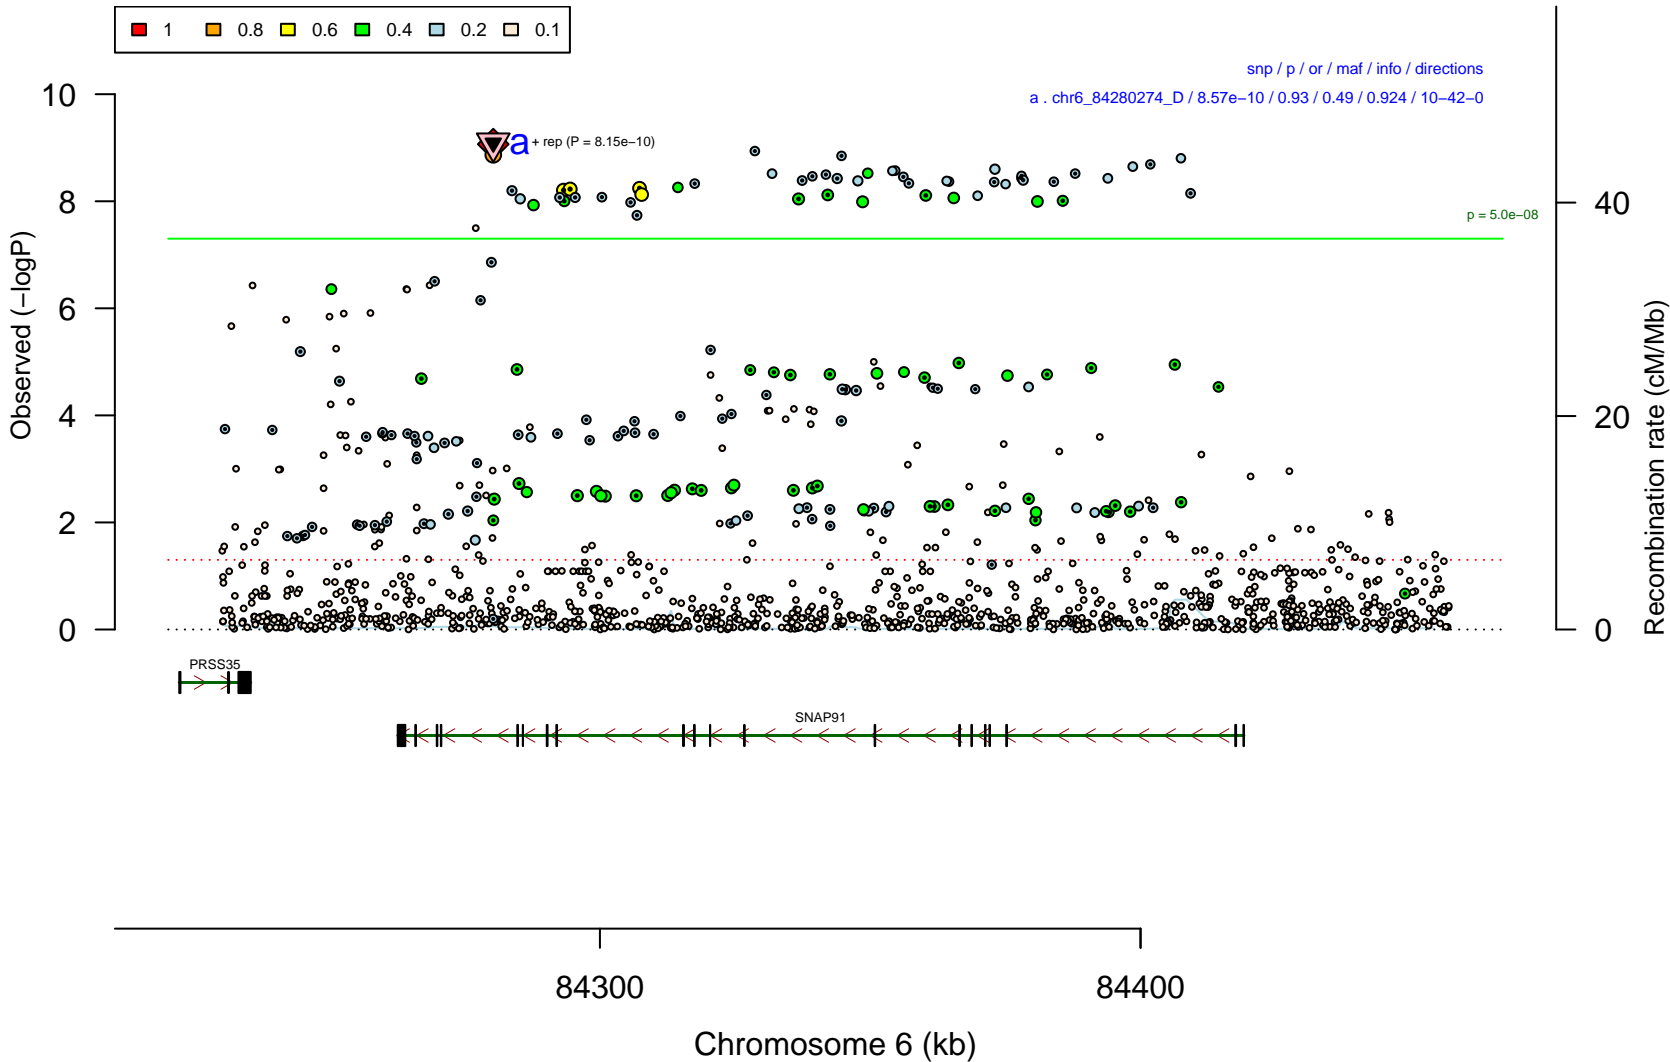

# PGC\_SCZ52.reg50

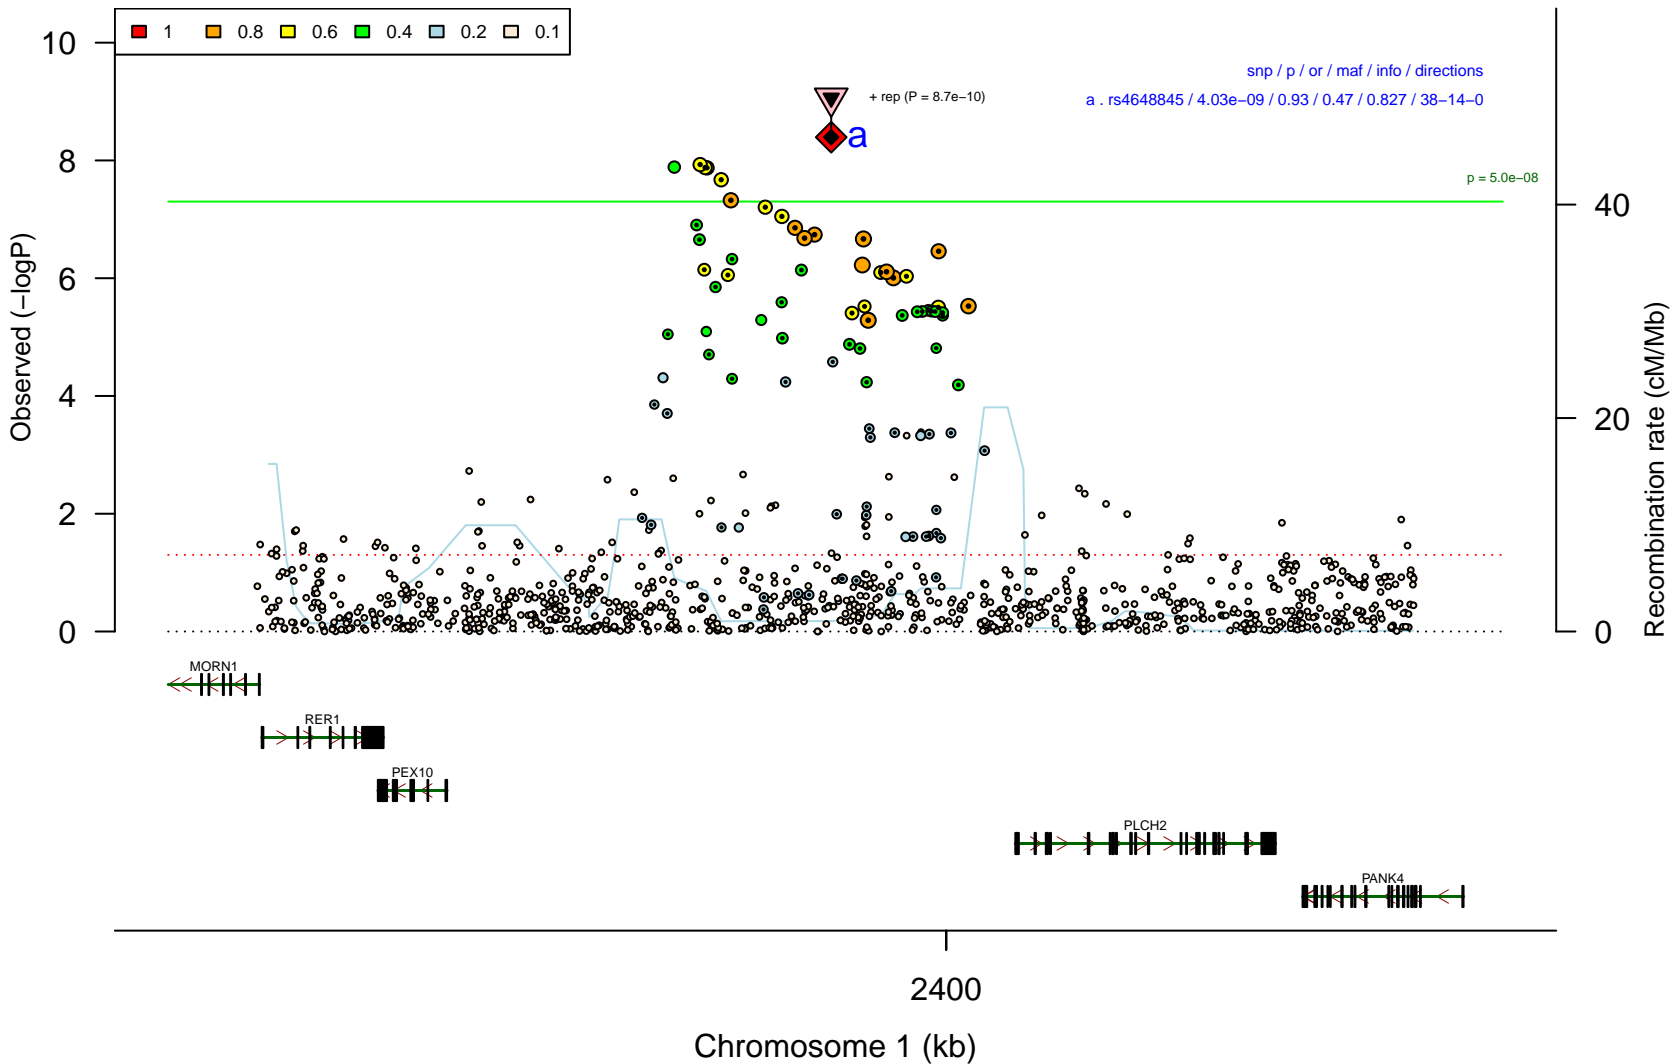

# PGC\_SCZ52.reg51

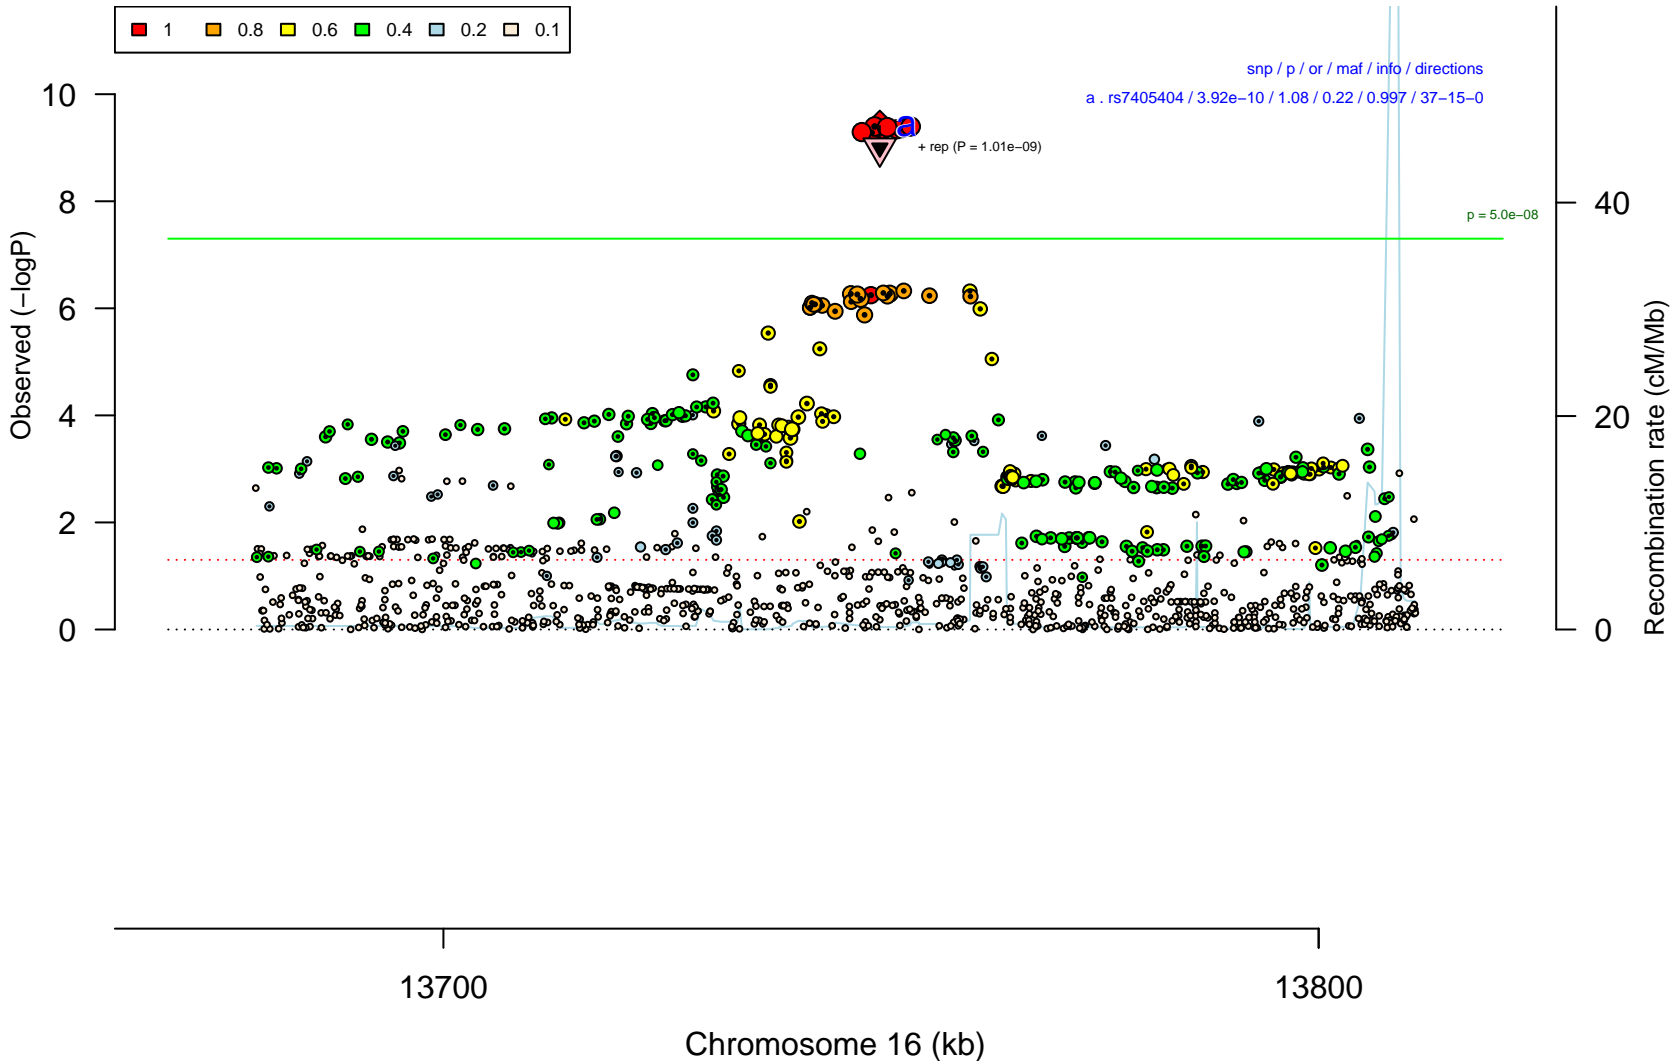

# PGC\_SCZ52.reg52

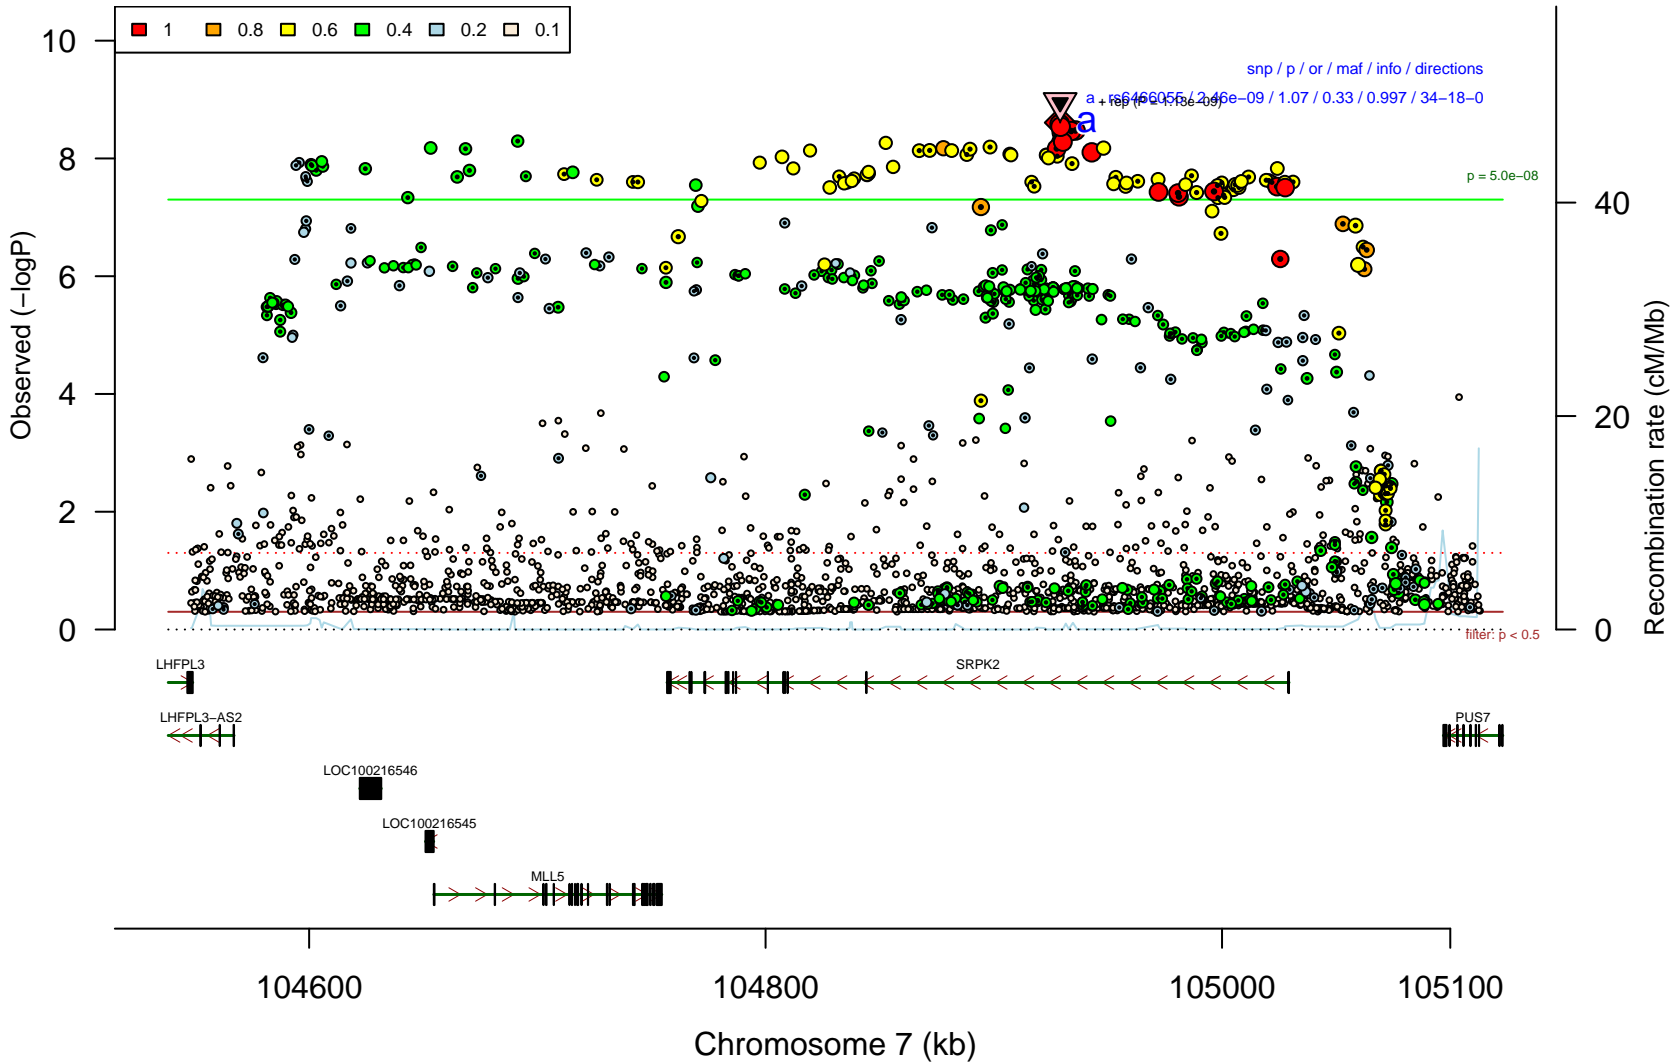

# PGC\_SCZ52.reg53

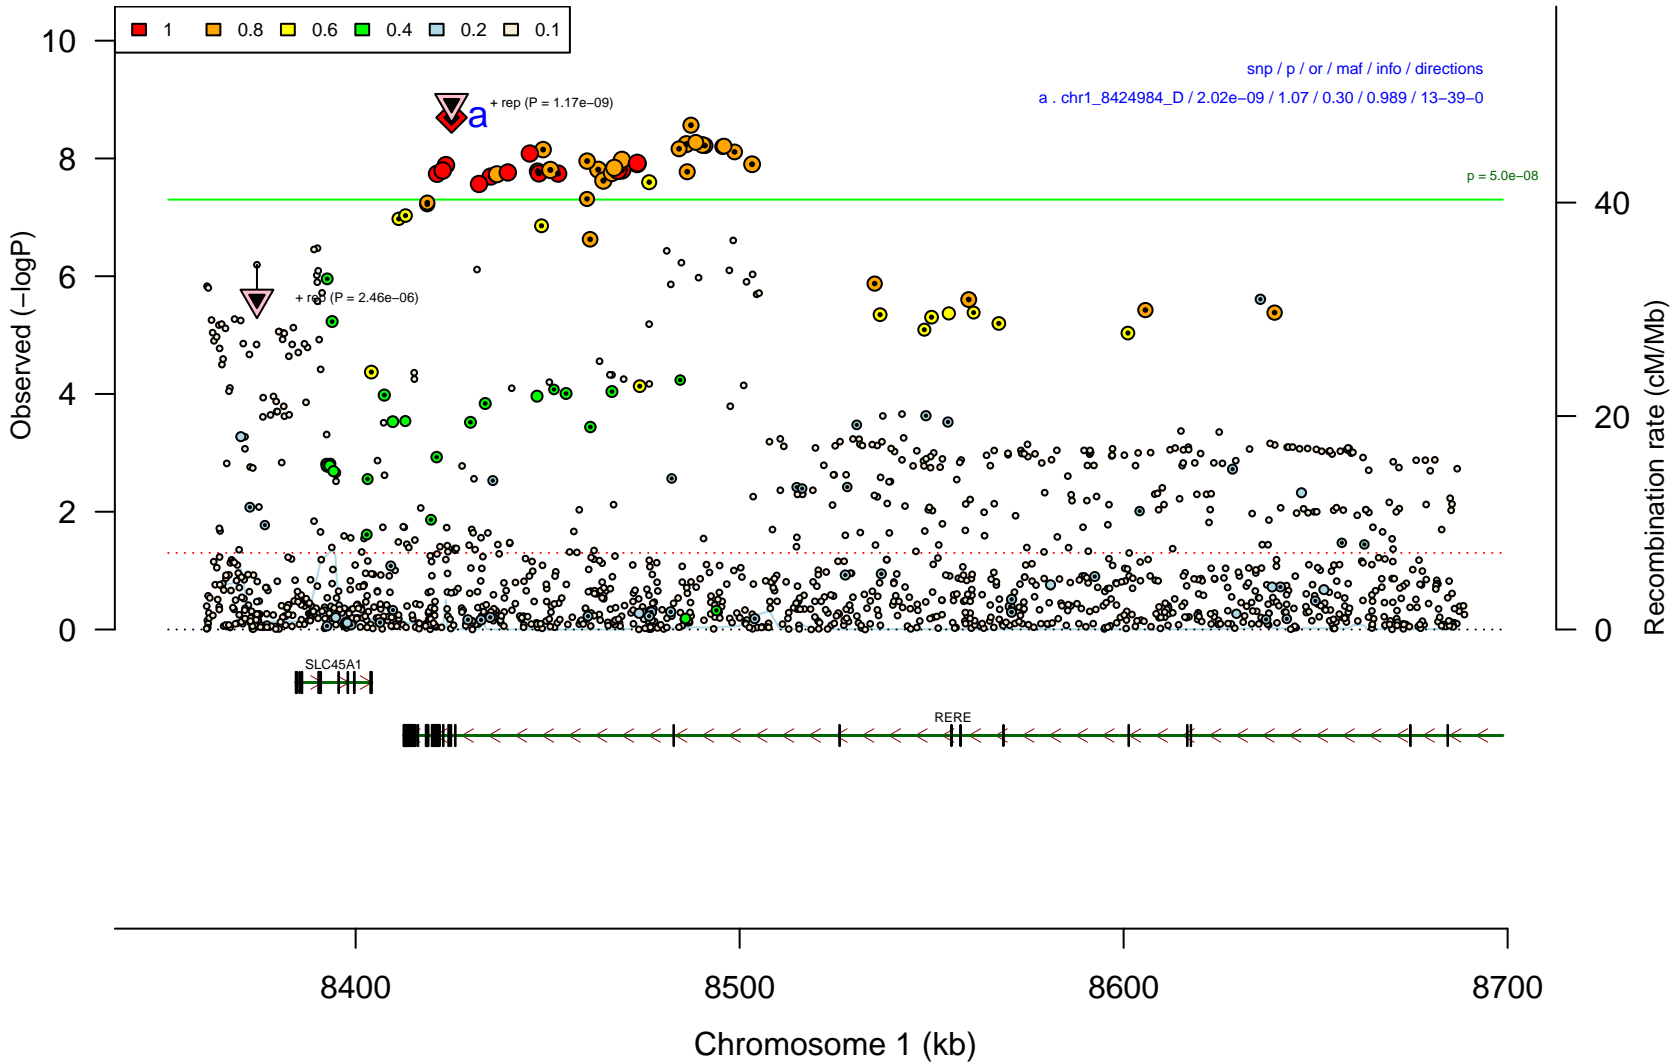

# PGC\_SCZ52.reg54

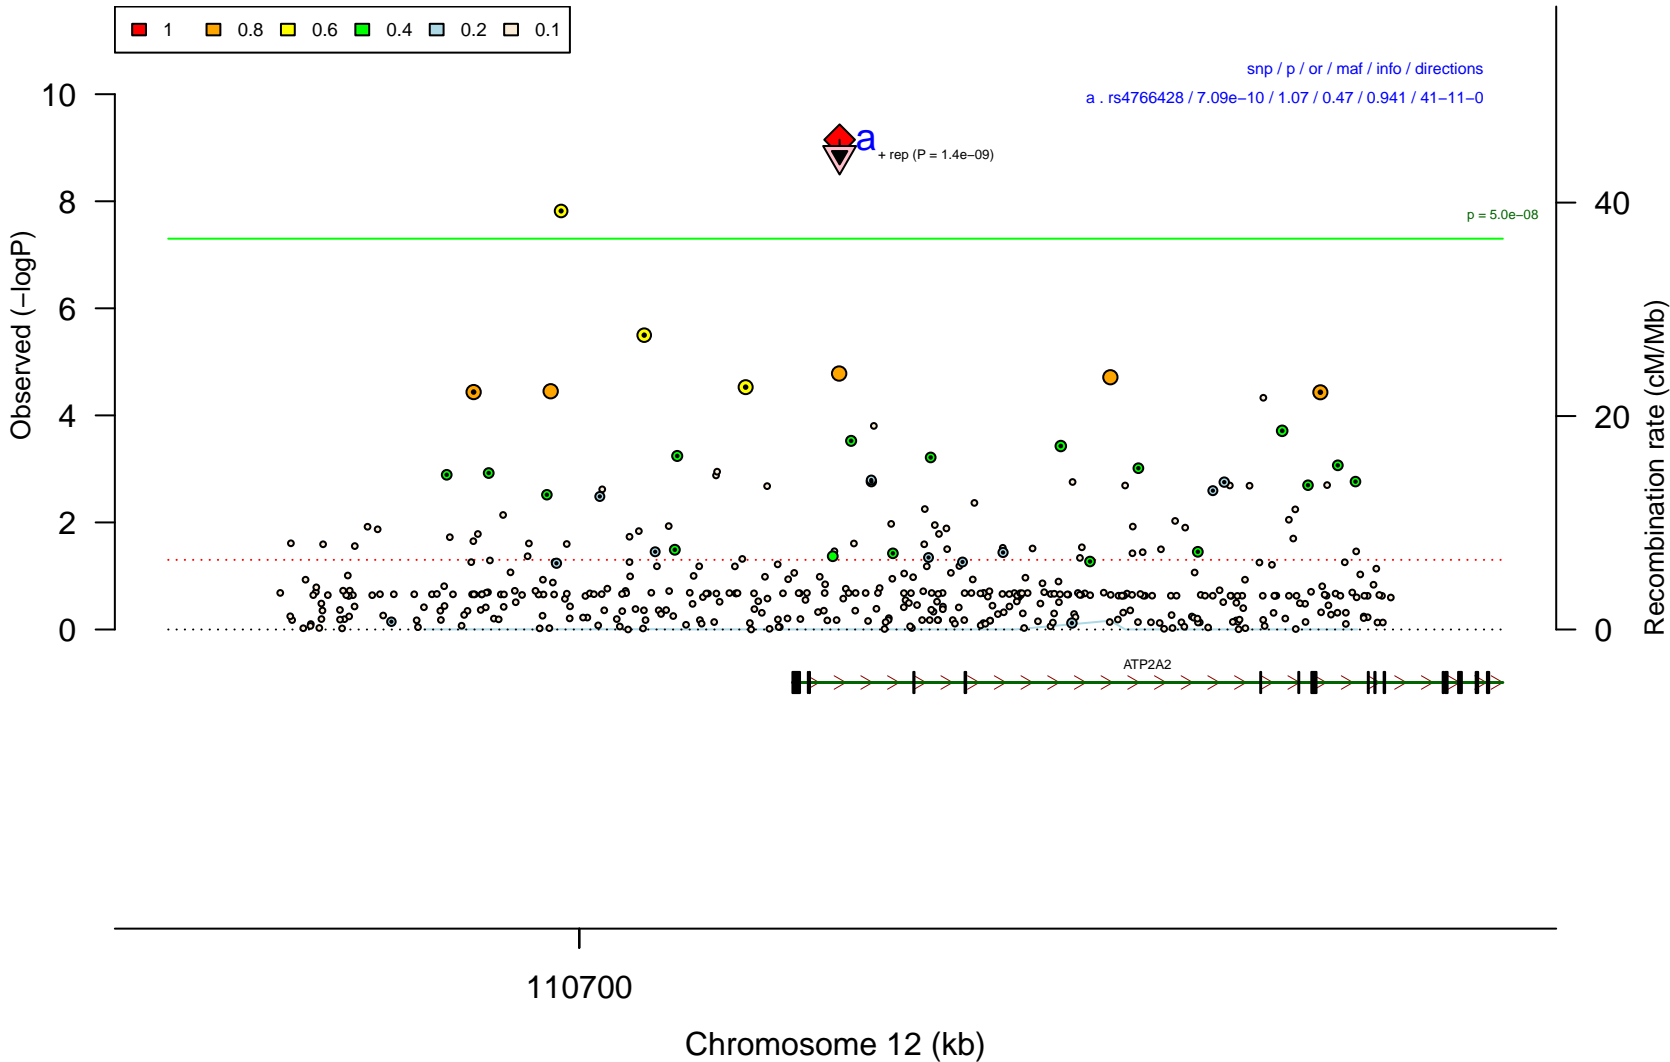

# PGC\_SCZ52.reg55

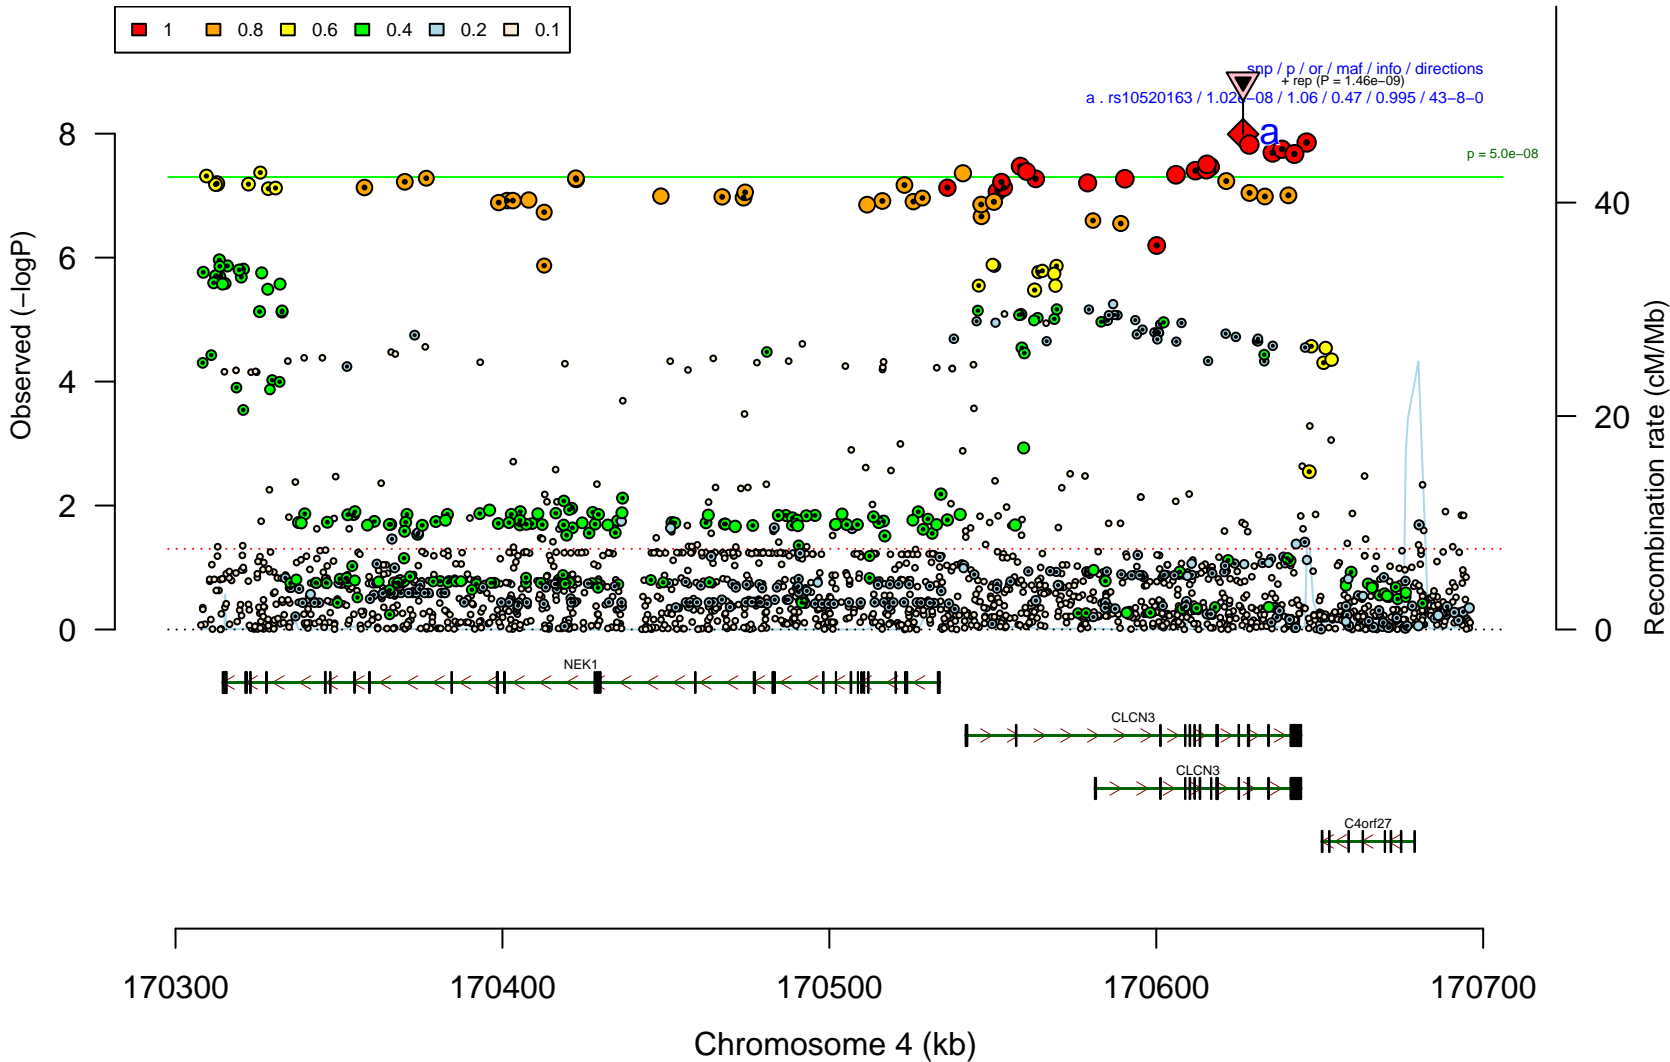

# PGC\_SCZ52.reg56

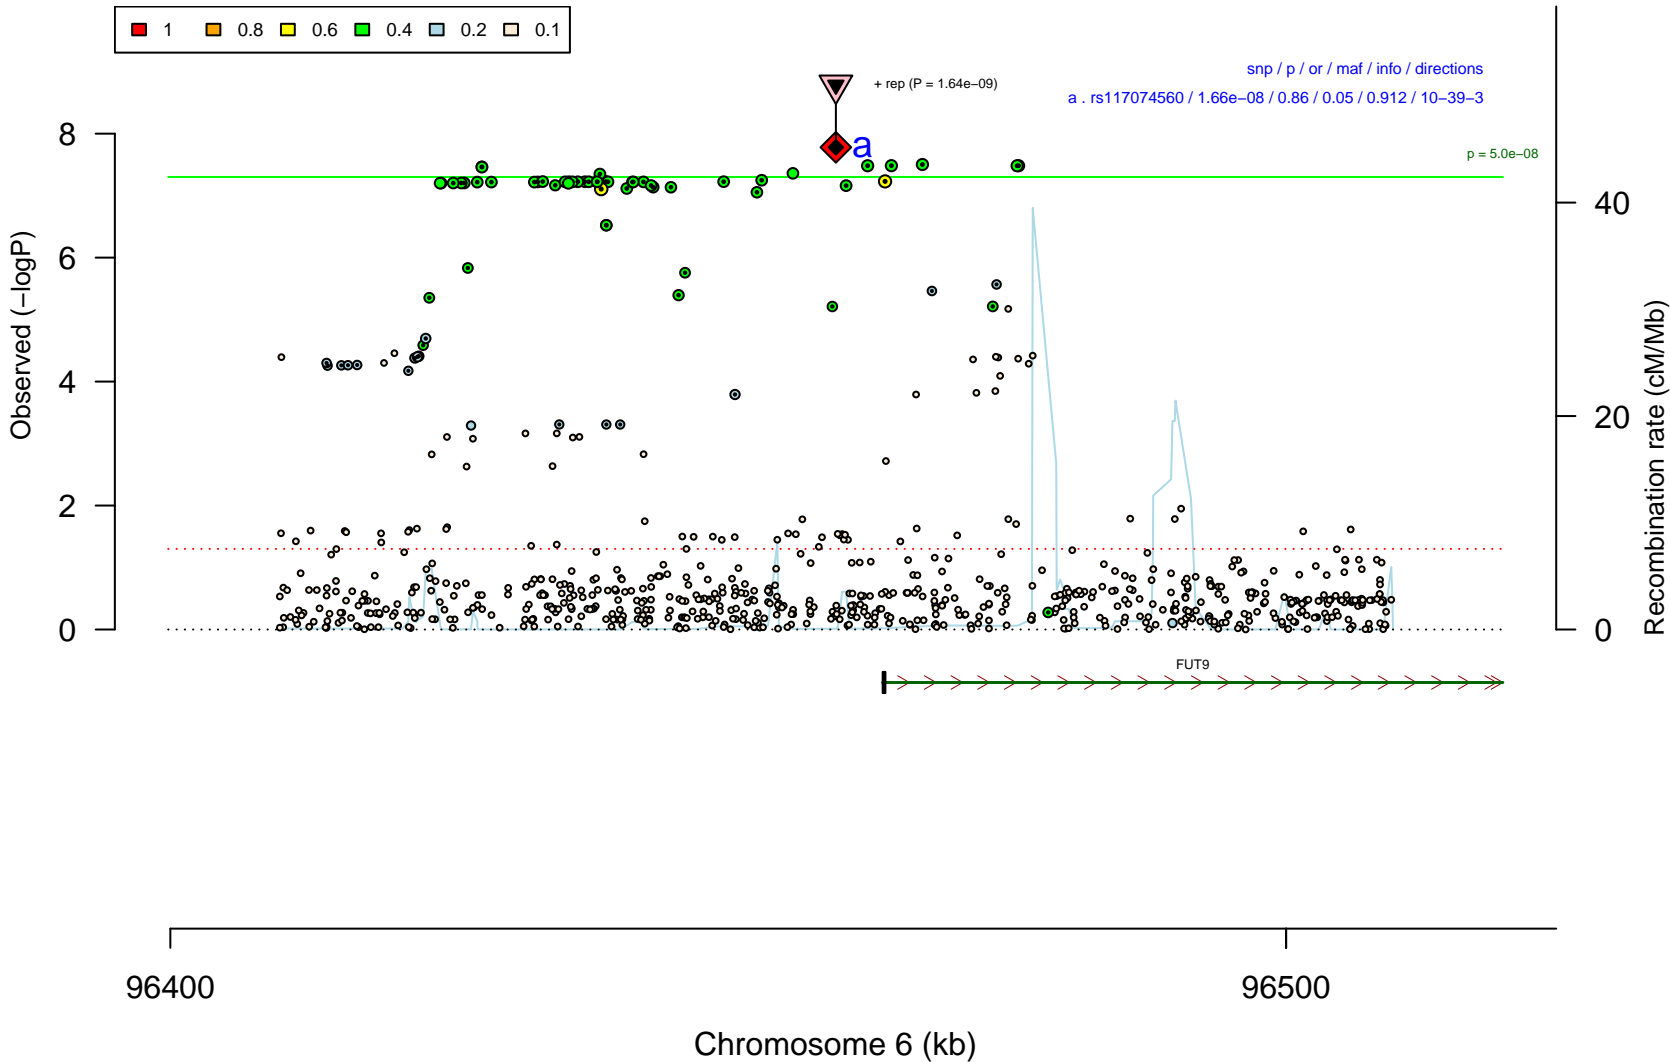



# PGC\_SCZ52.reg57

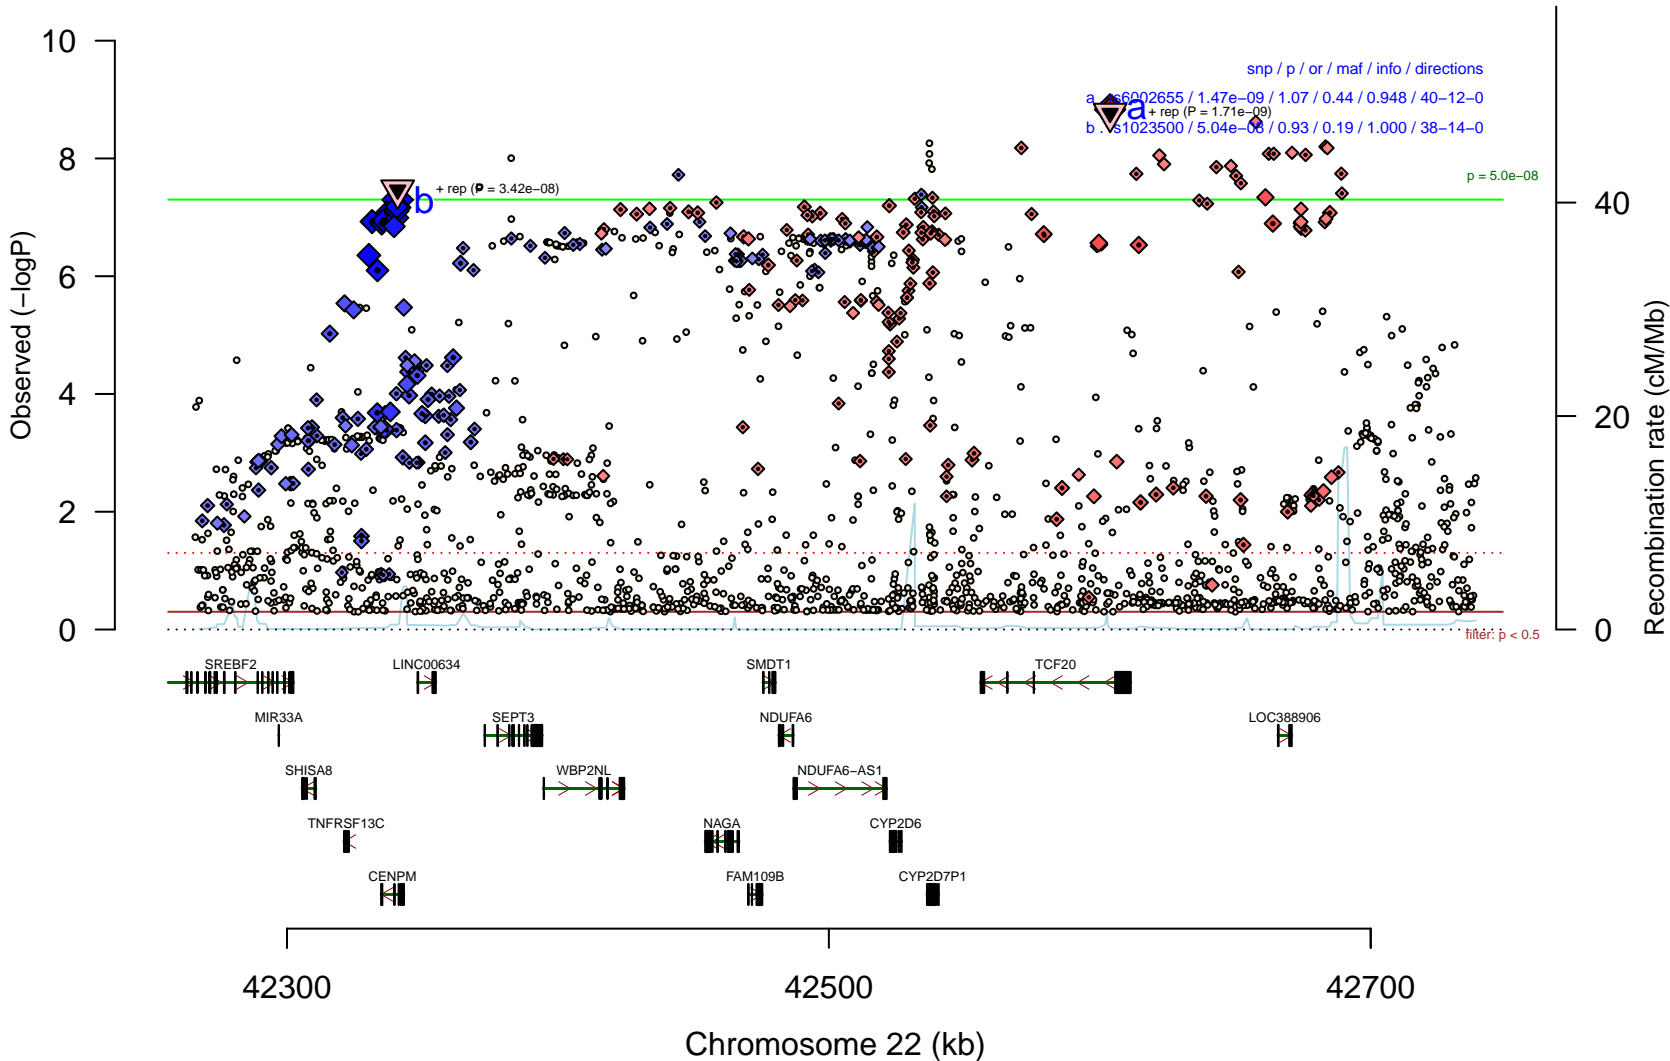

# PGC\_SCZ52.reg58

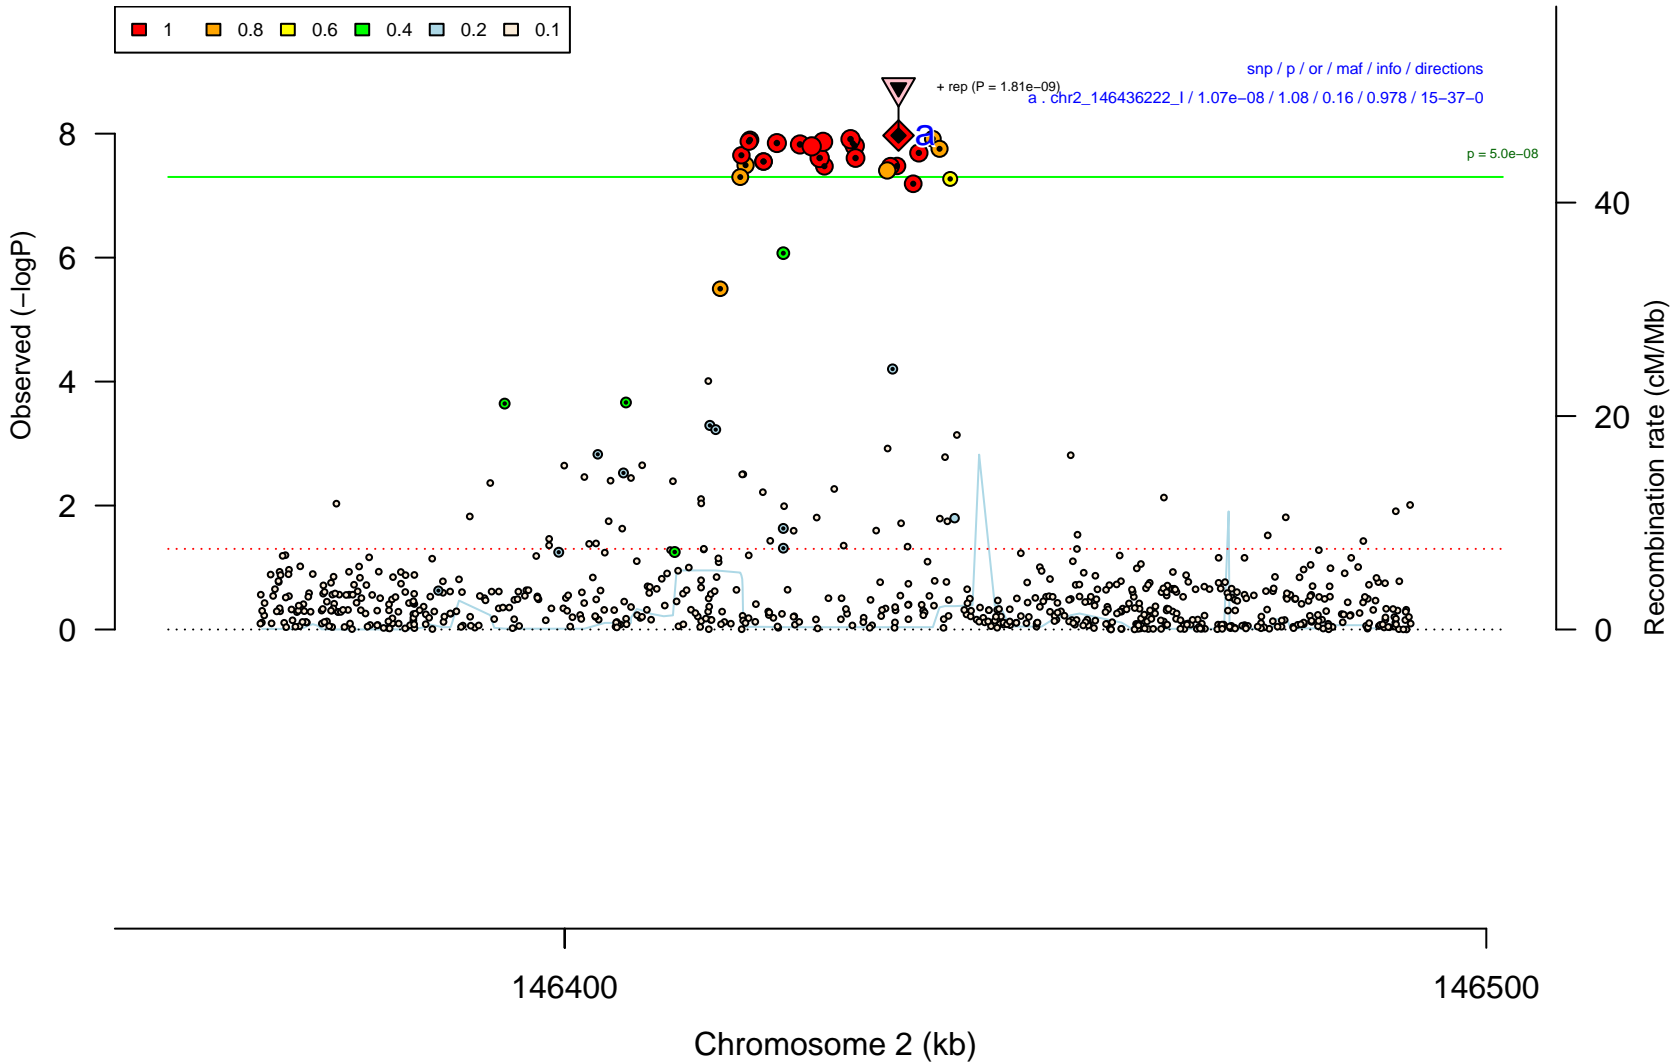

# PGC\_SCZ52.reg59

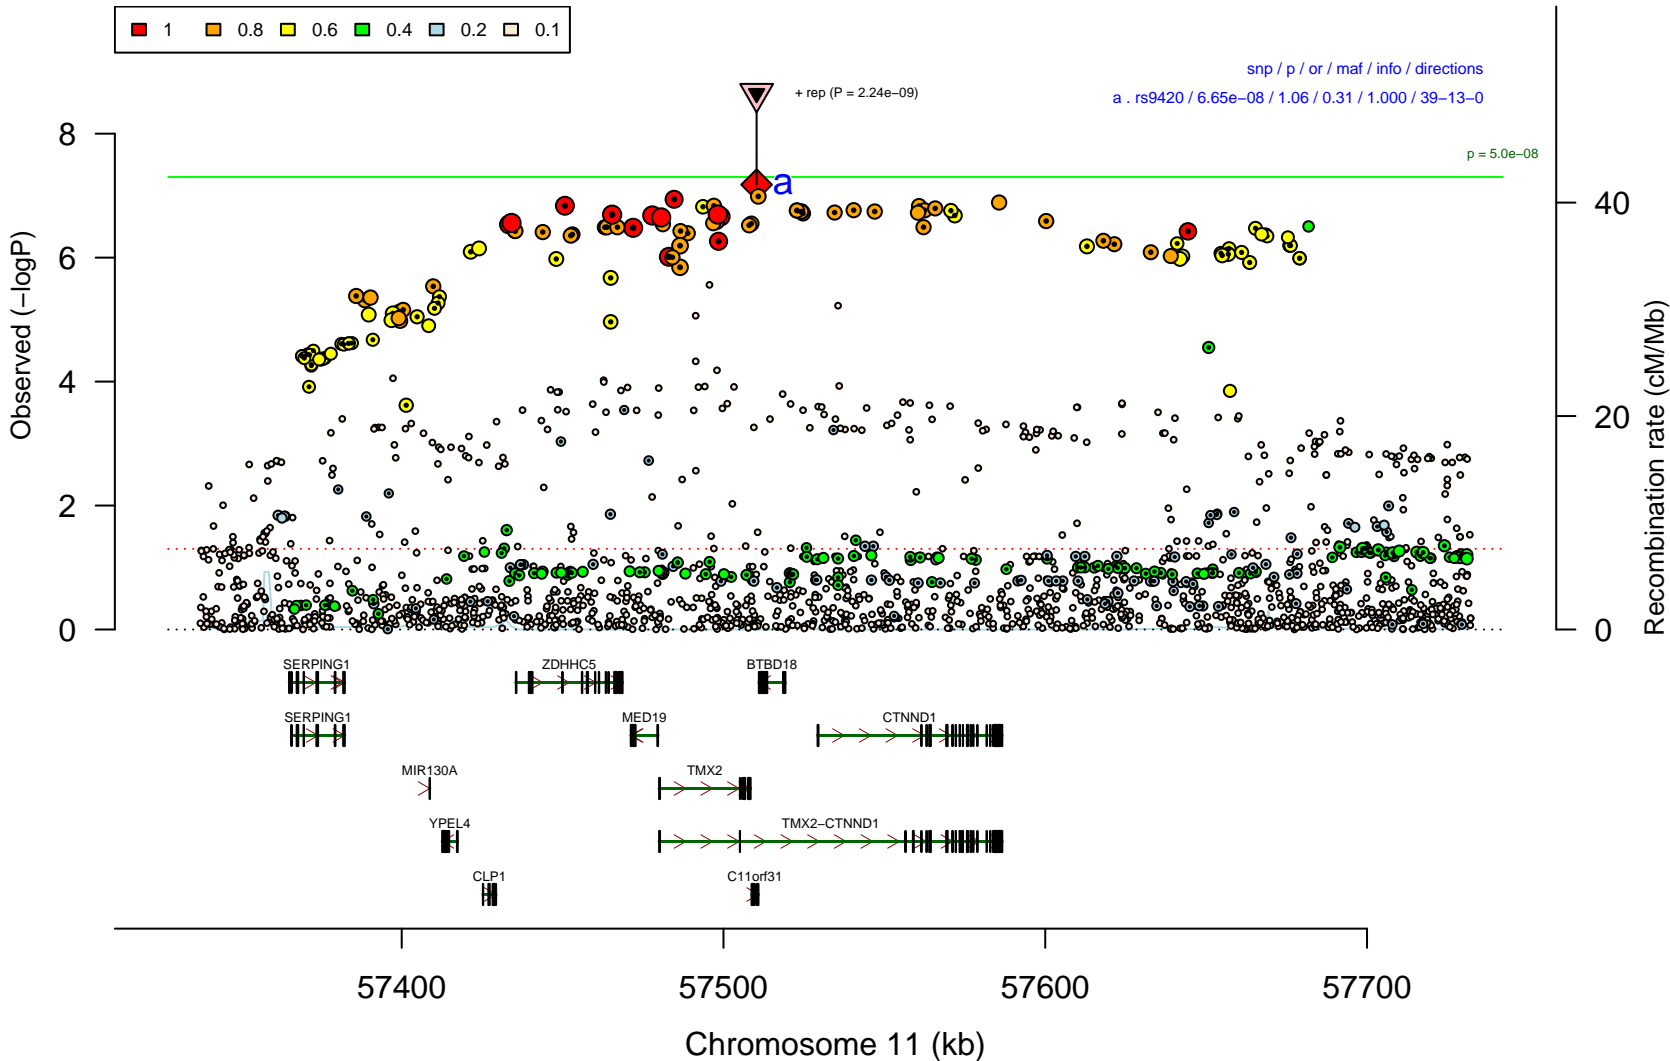

# PGC\_SCZ52.reg60

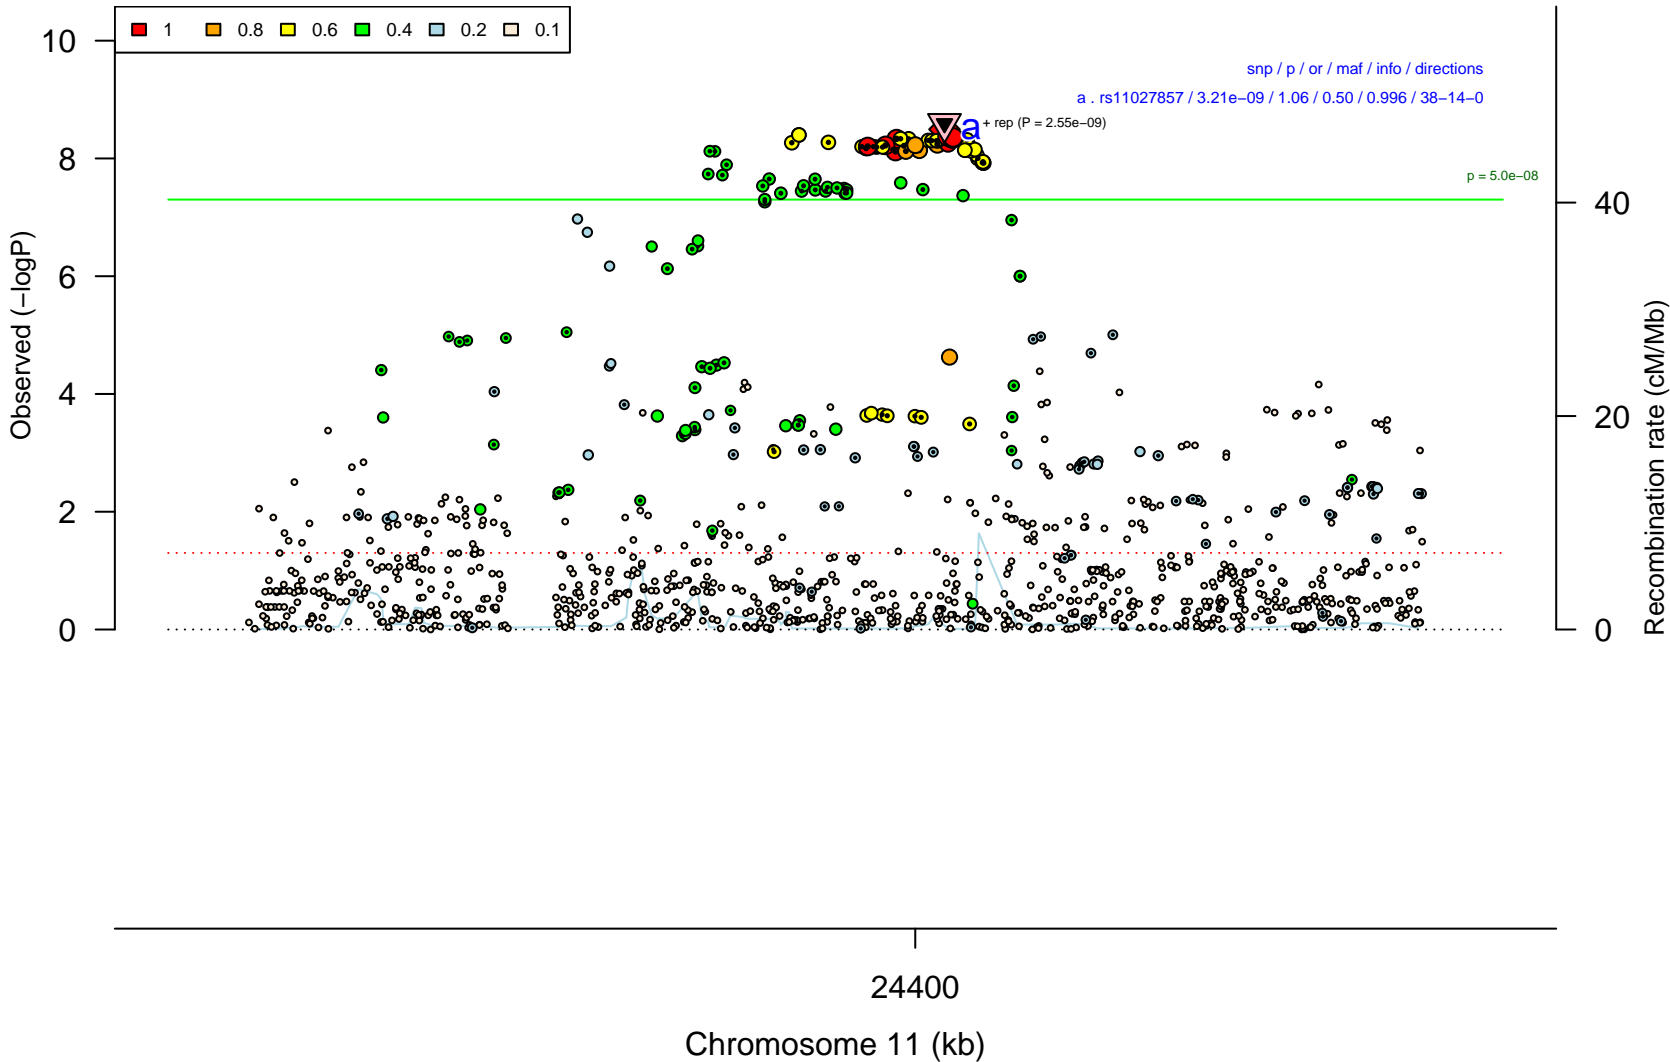

# PGC\_SCZ52.reg61

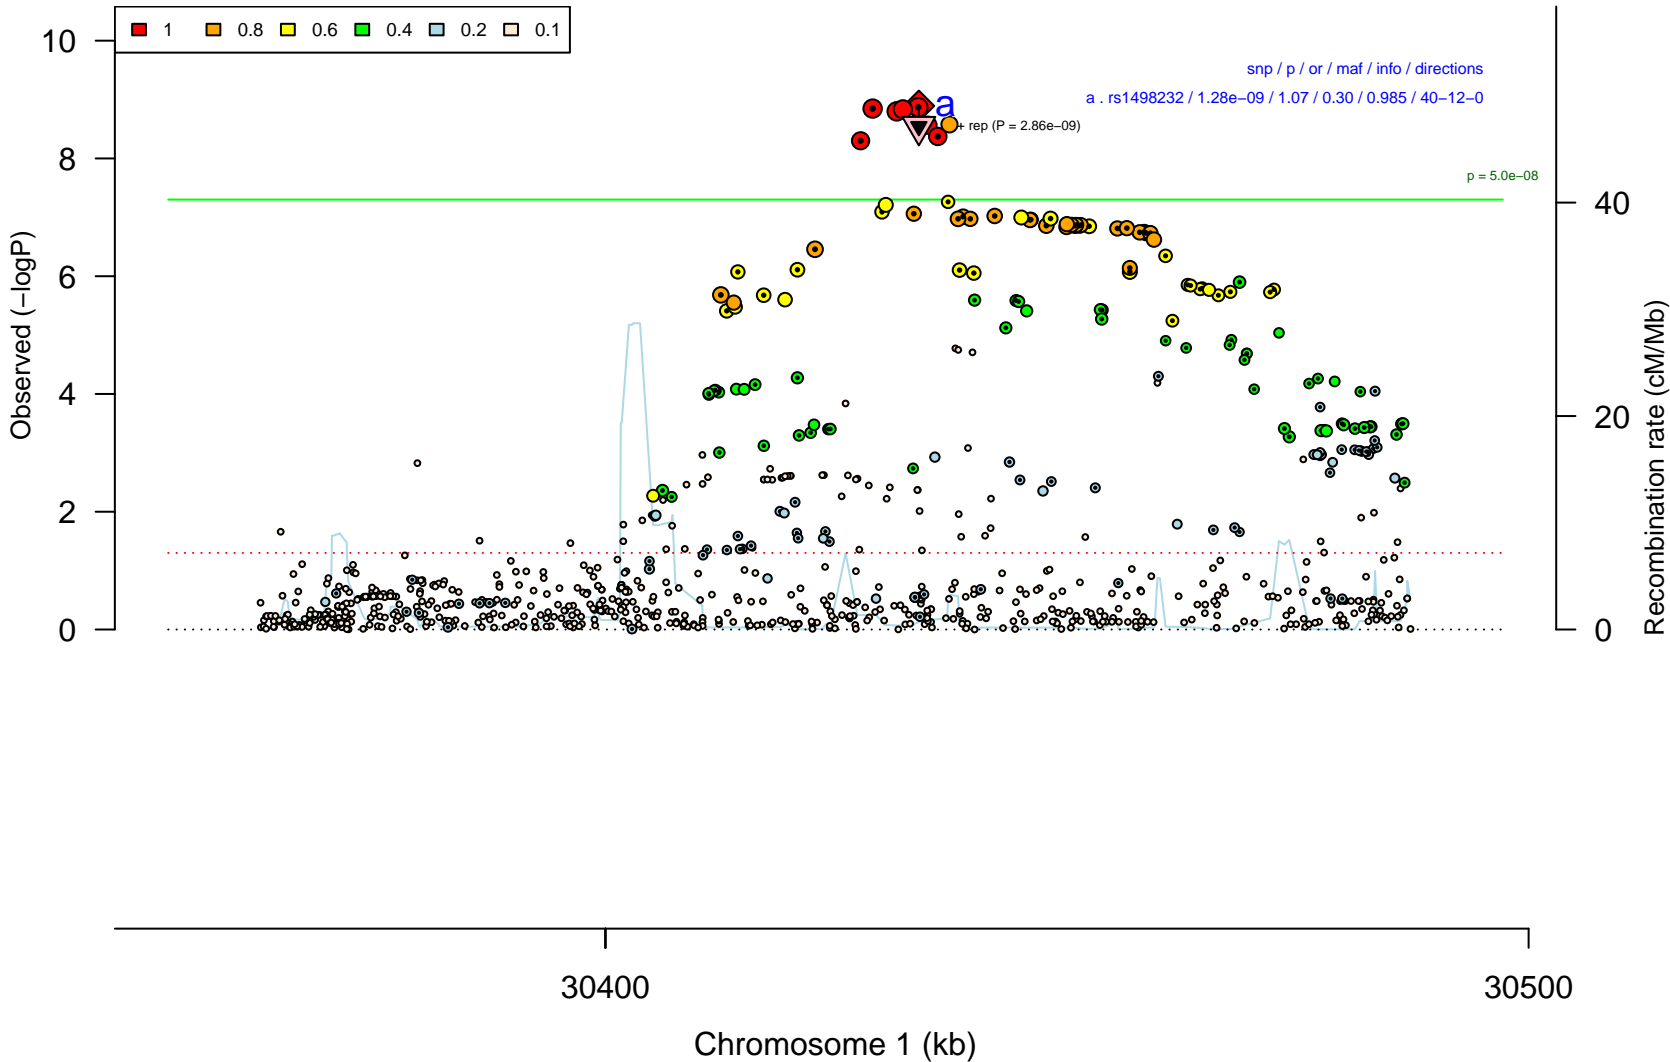

# PGC\_SCZ52.reg62

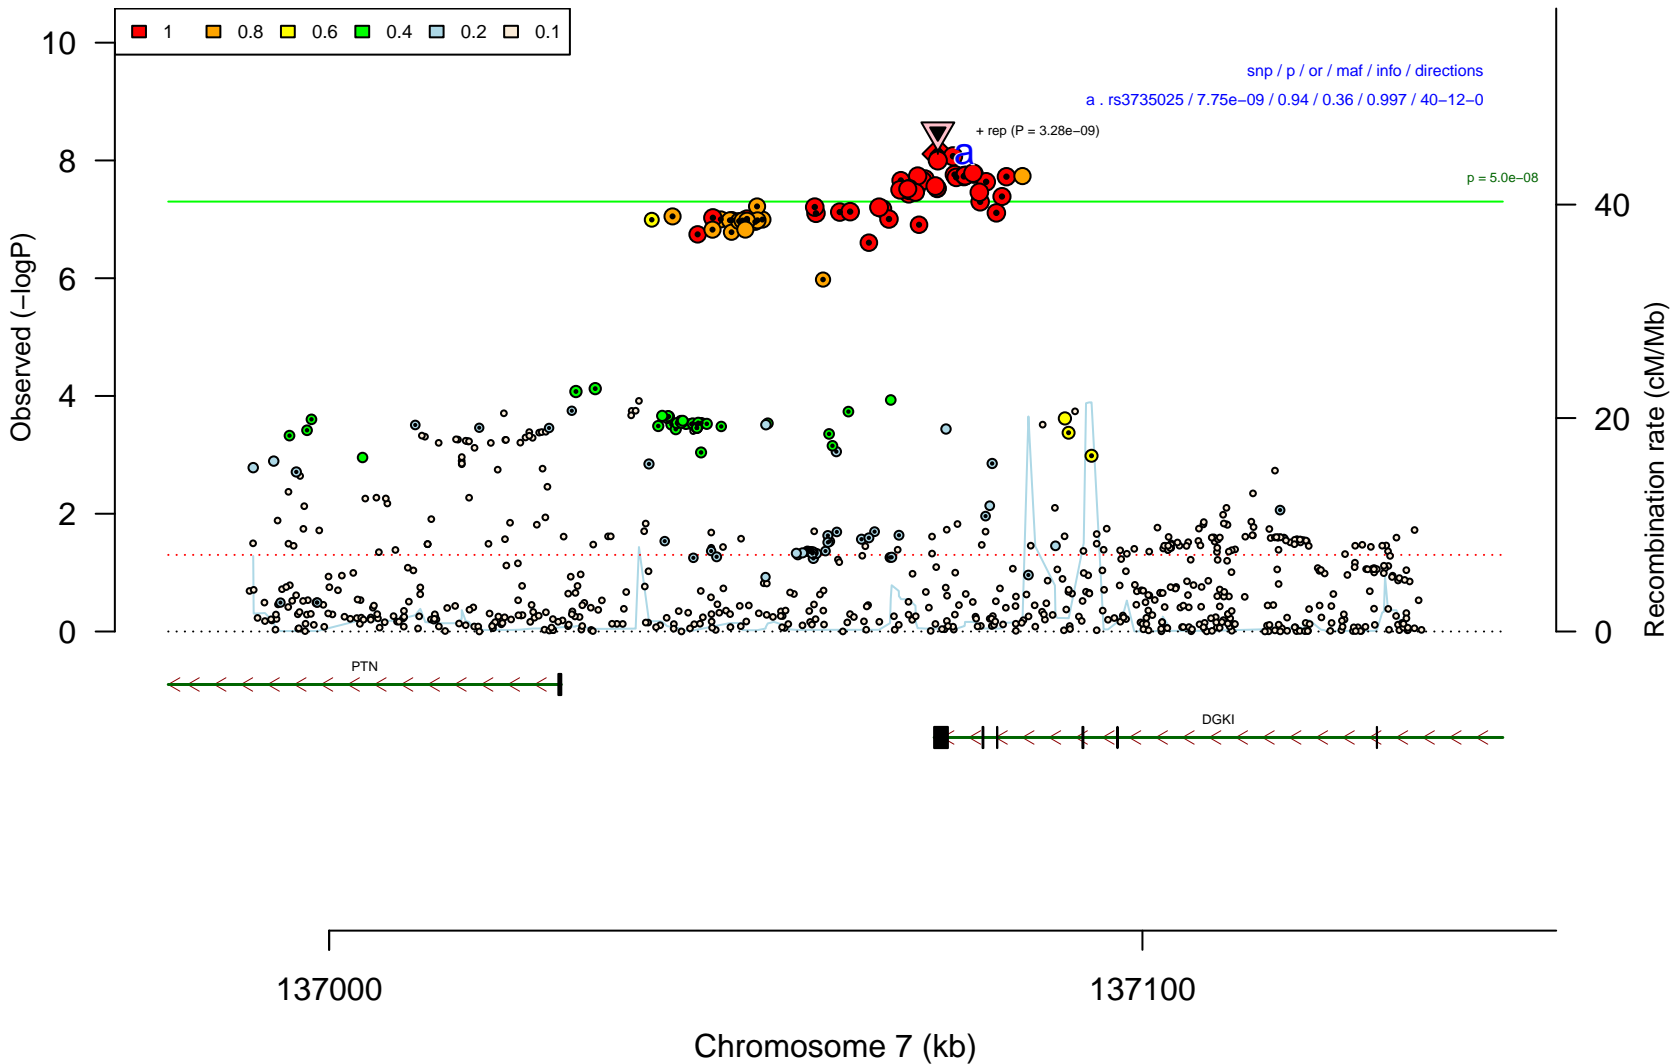

# PGC\_SCZ52.reg63

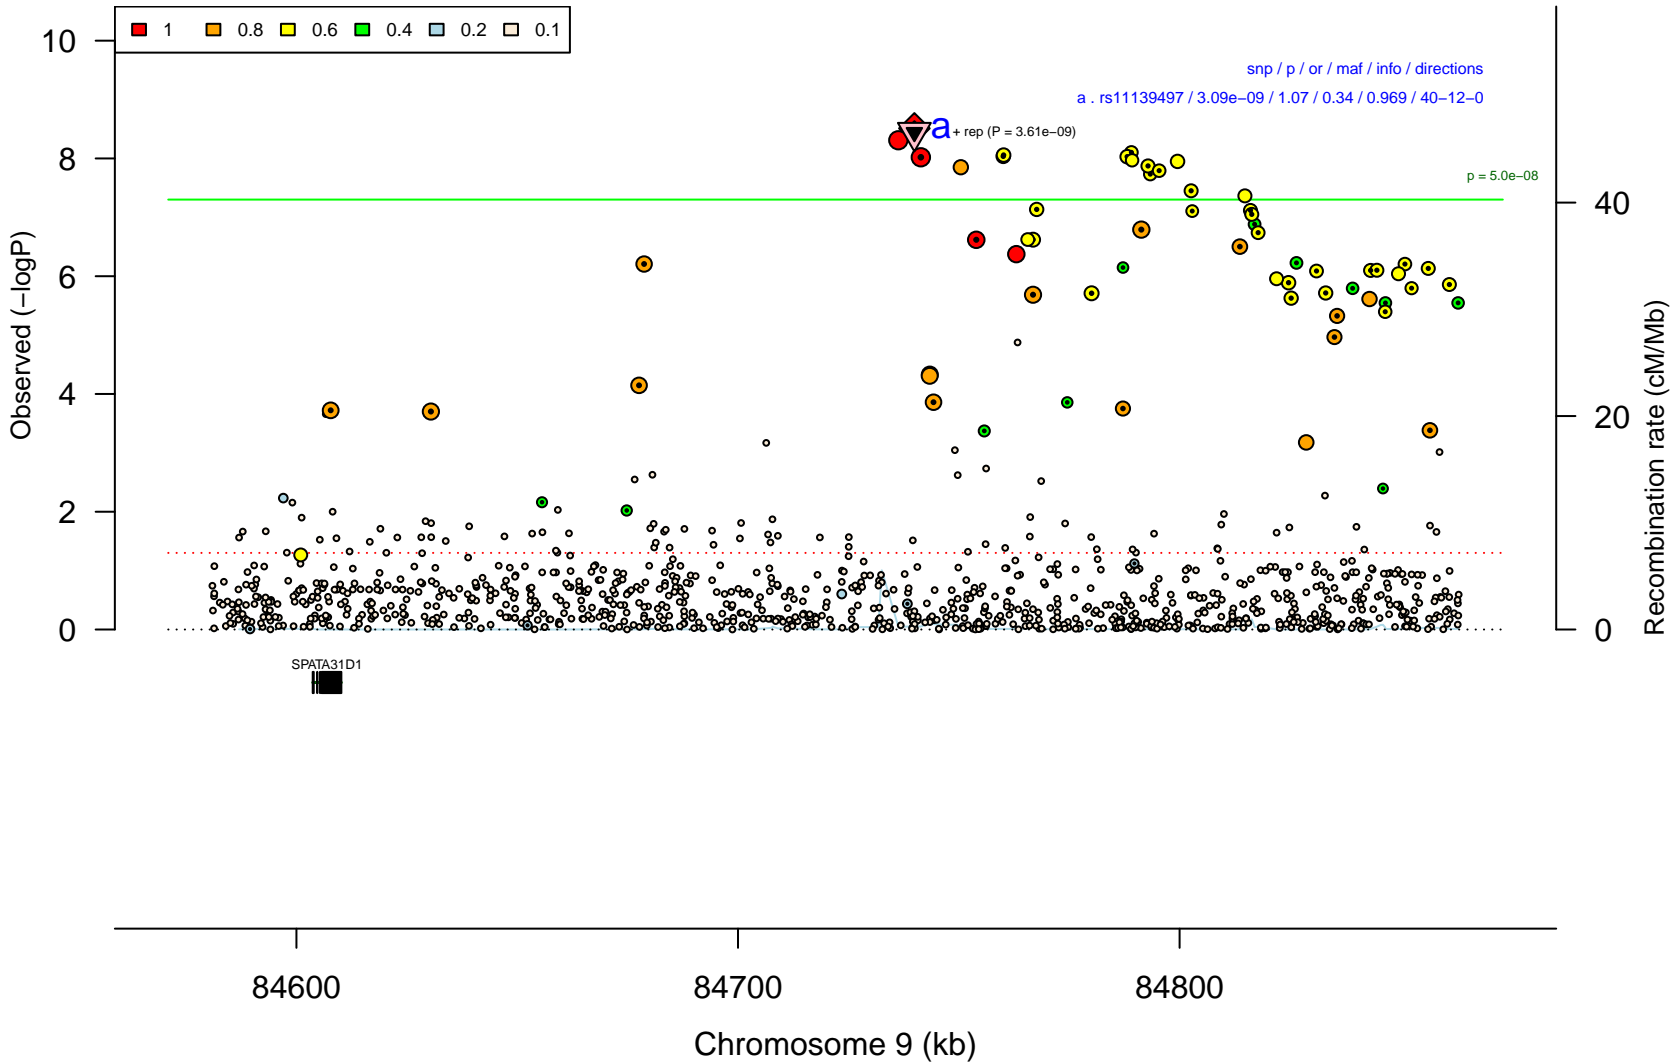

# PGC\_SCZ52.reg64

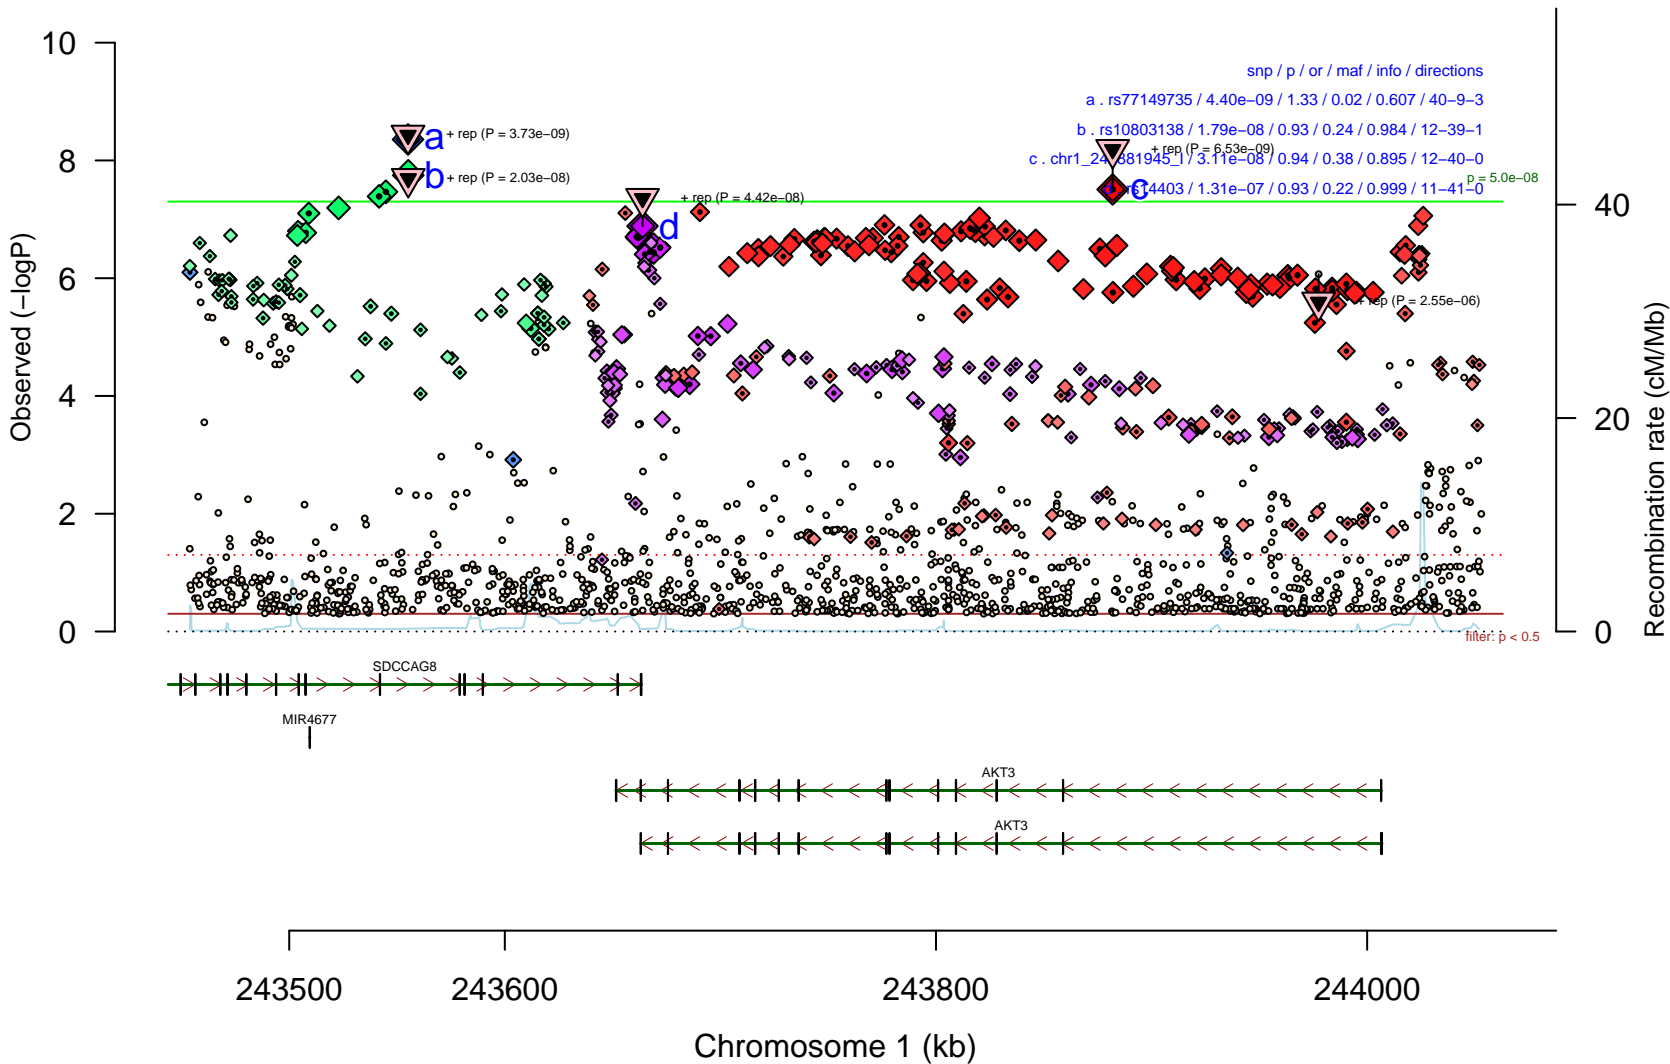



# PGC\_SCZ52.reg65

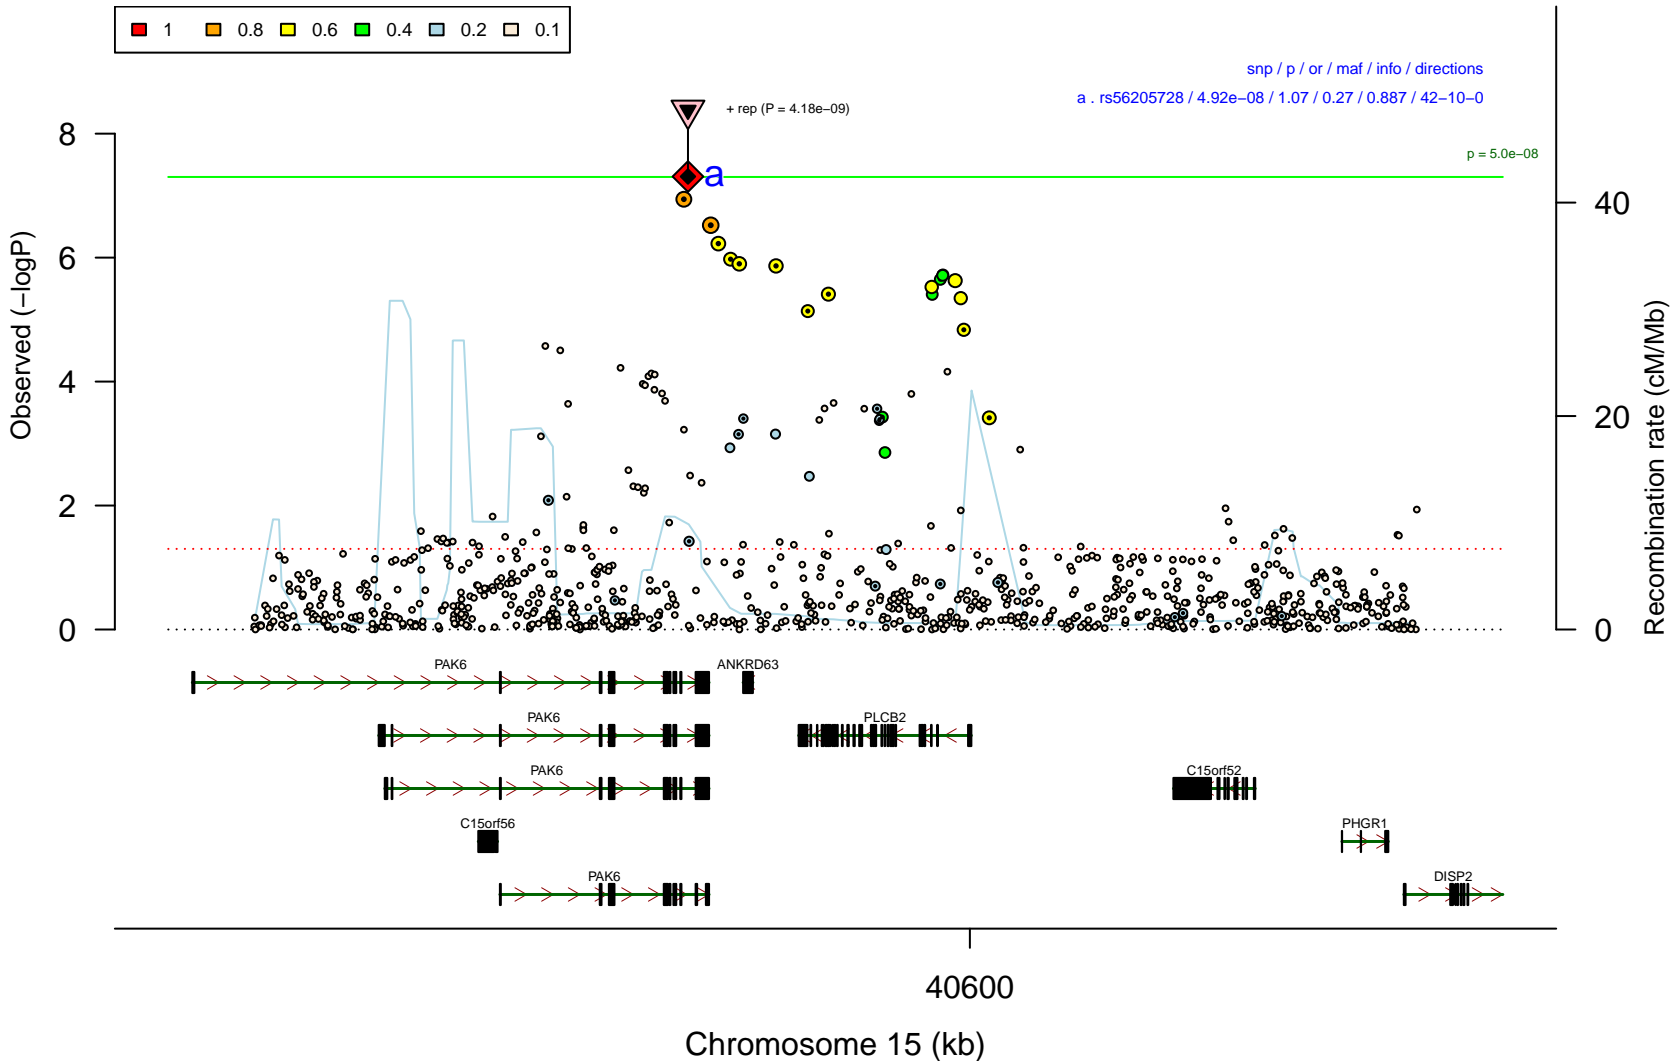

# PGC\_SCZ52.reg66

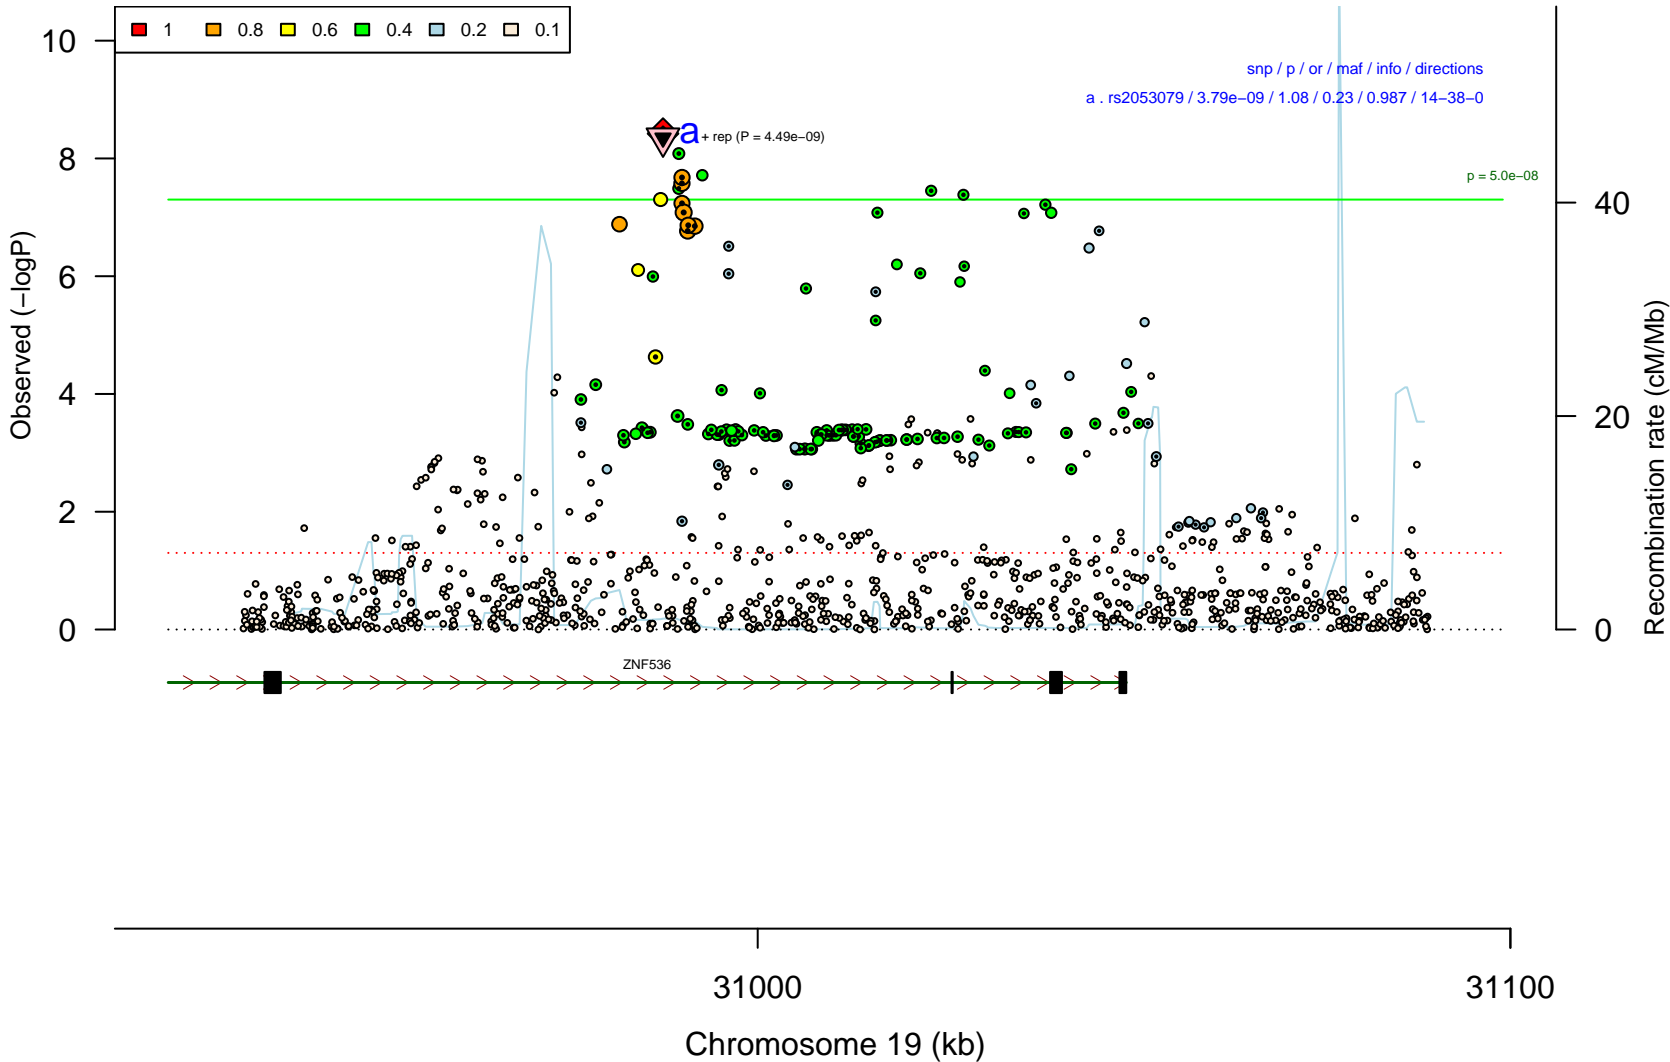

# PGC\_SCZ52.reg67

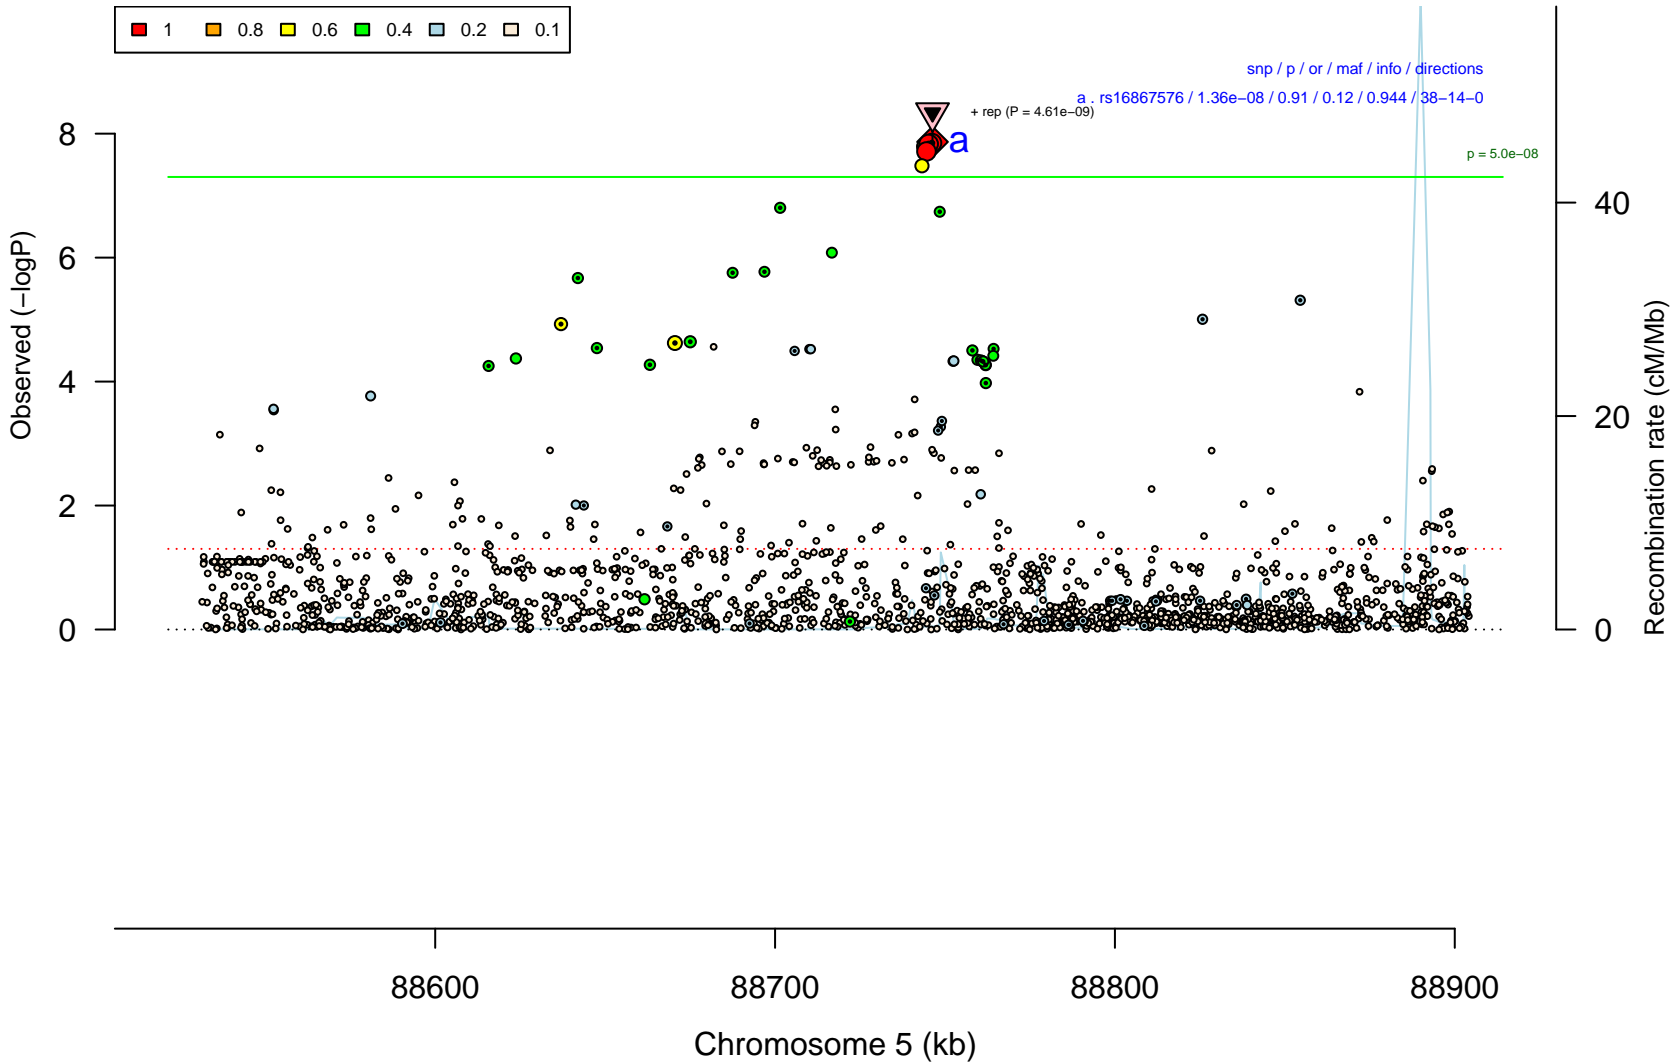

# PGC\_SCZ52.reg68

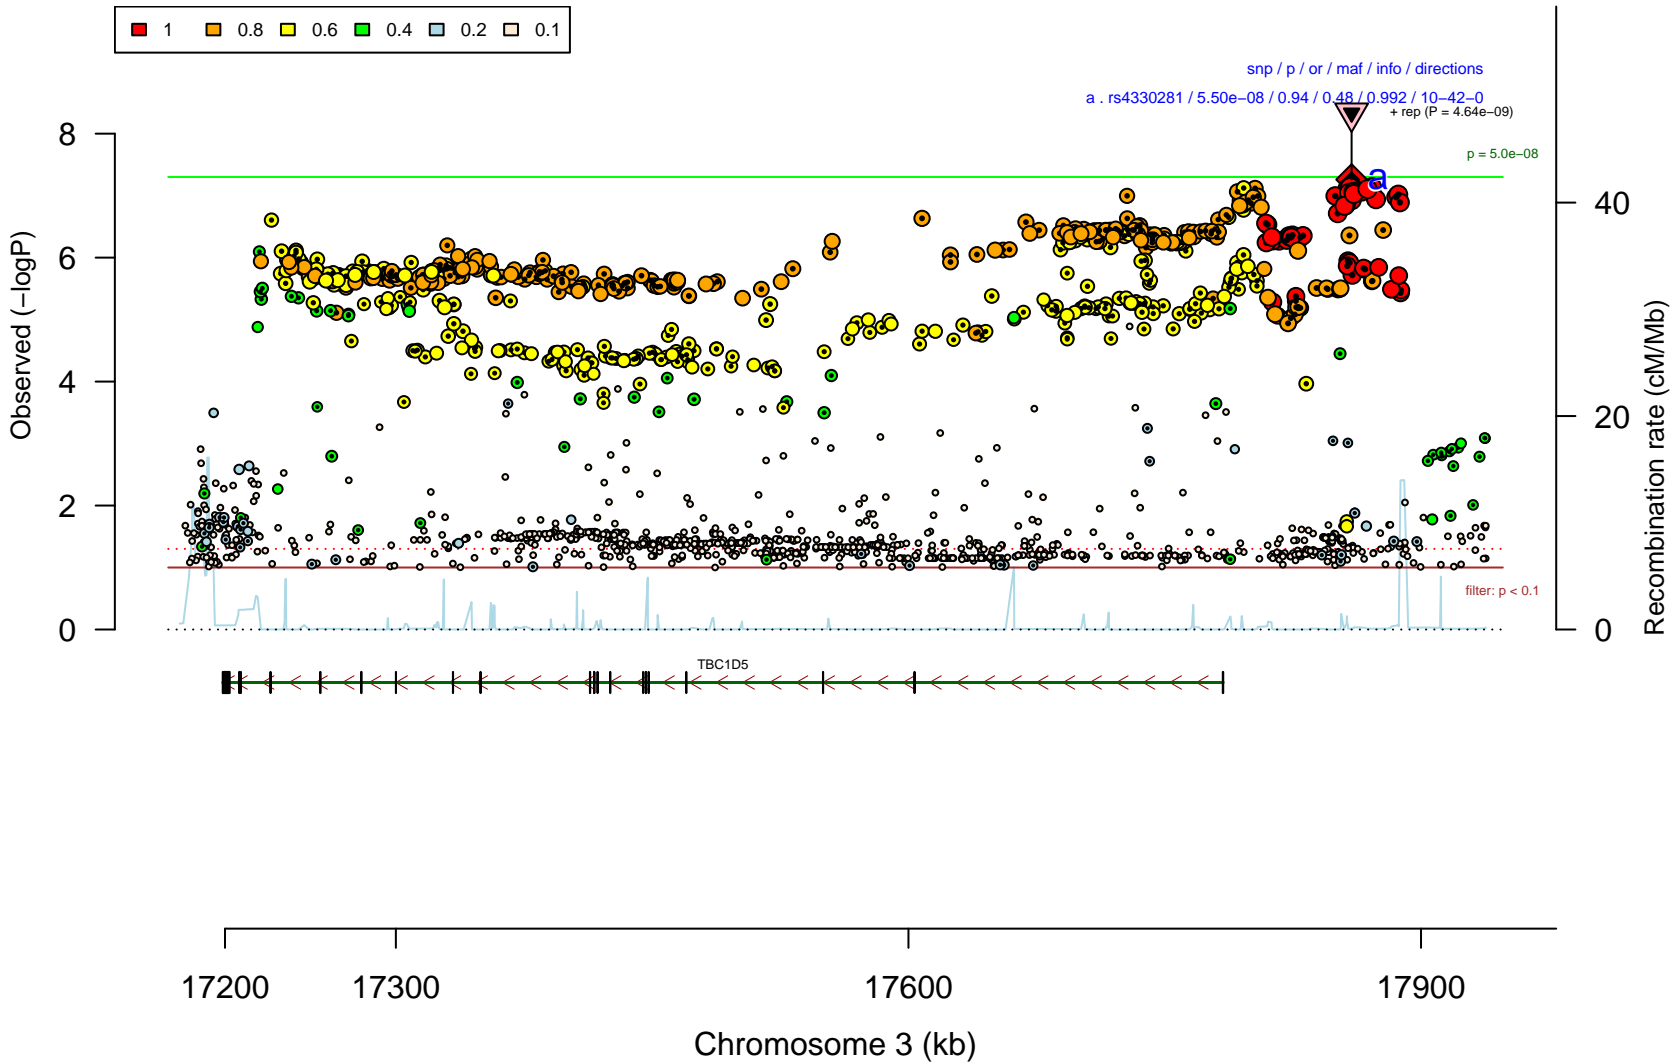

# PGC\_SCZ52.reg69

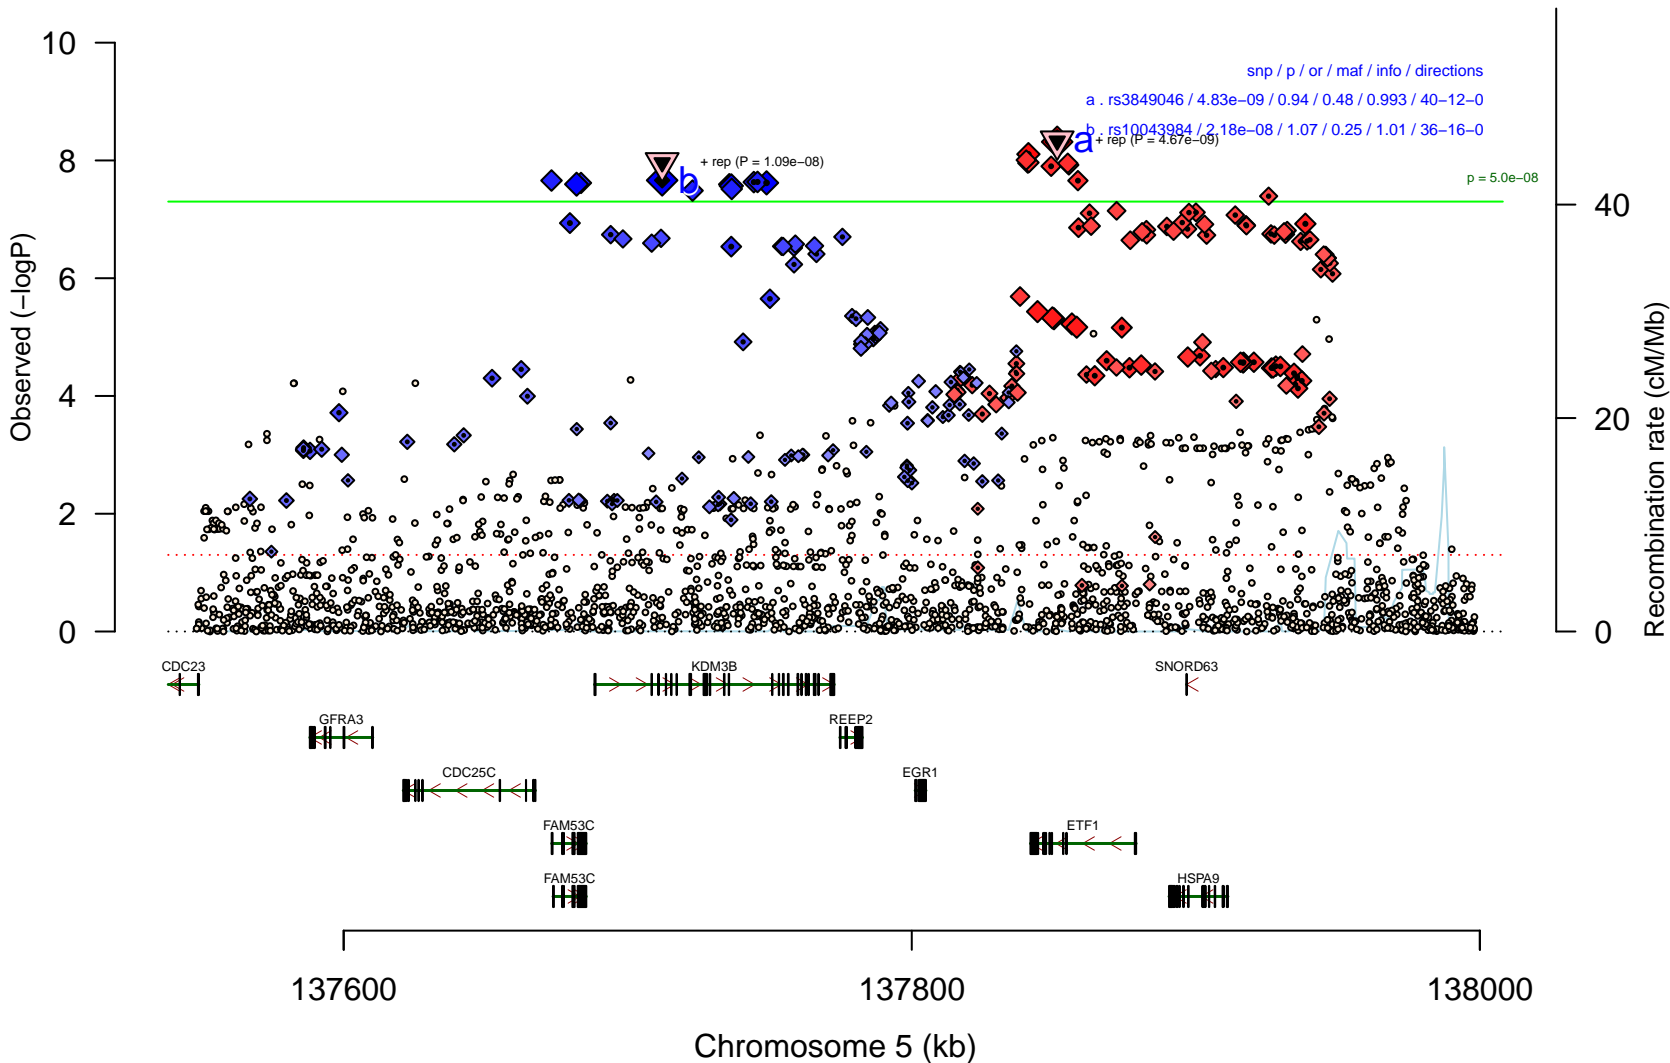

# PGC\_SCZ52.reg70

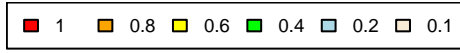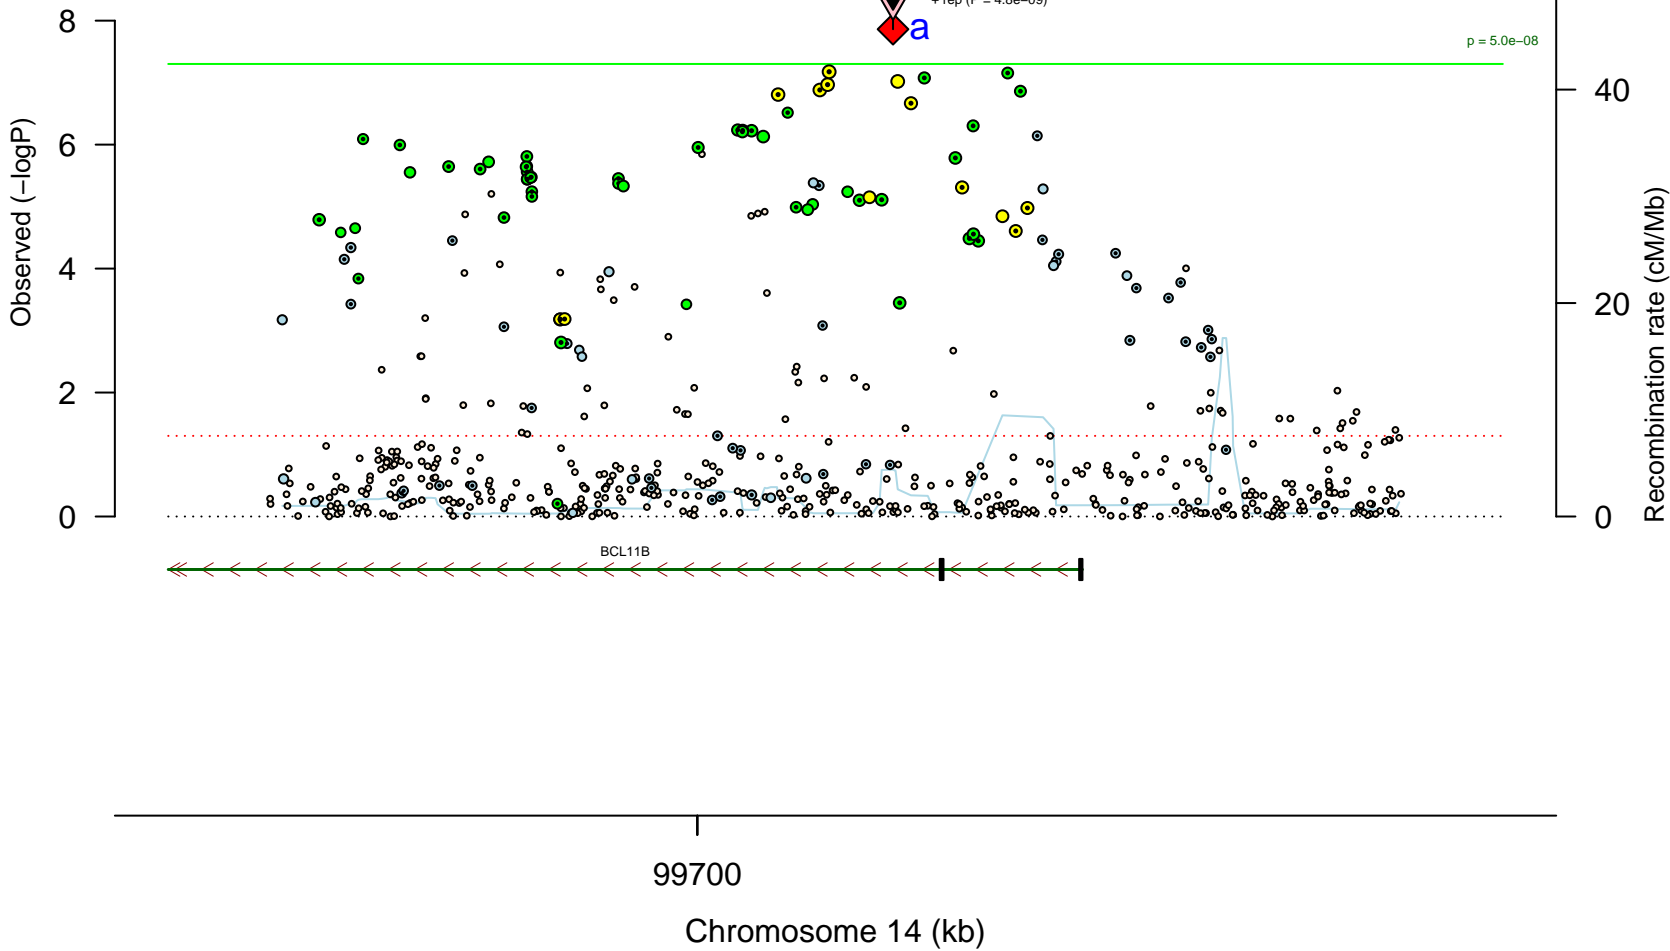

# PGC\_SCZ52.reg71

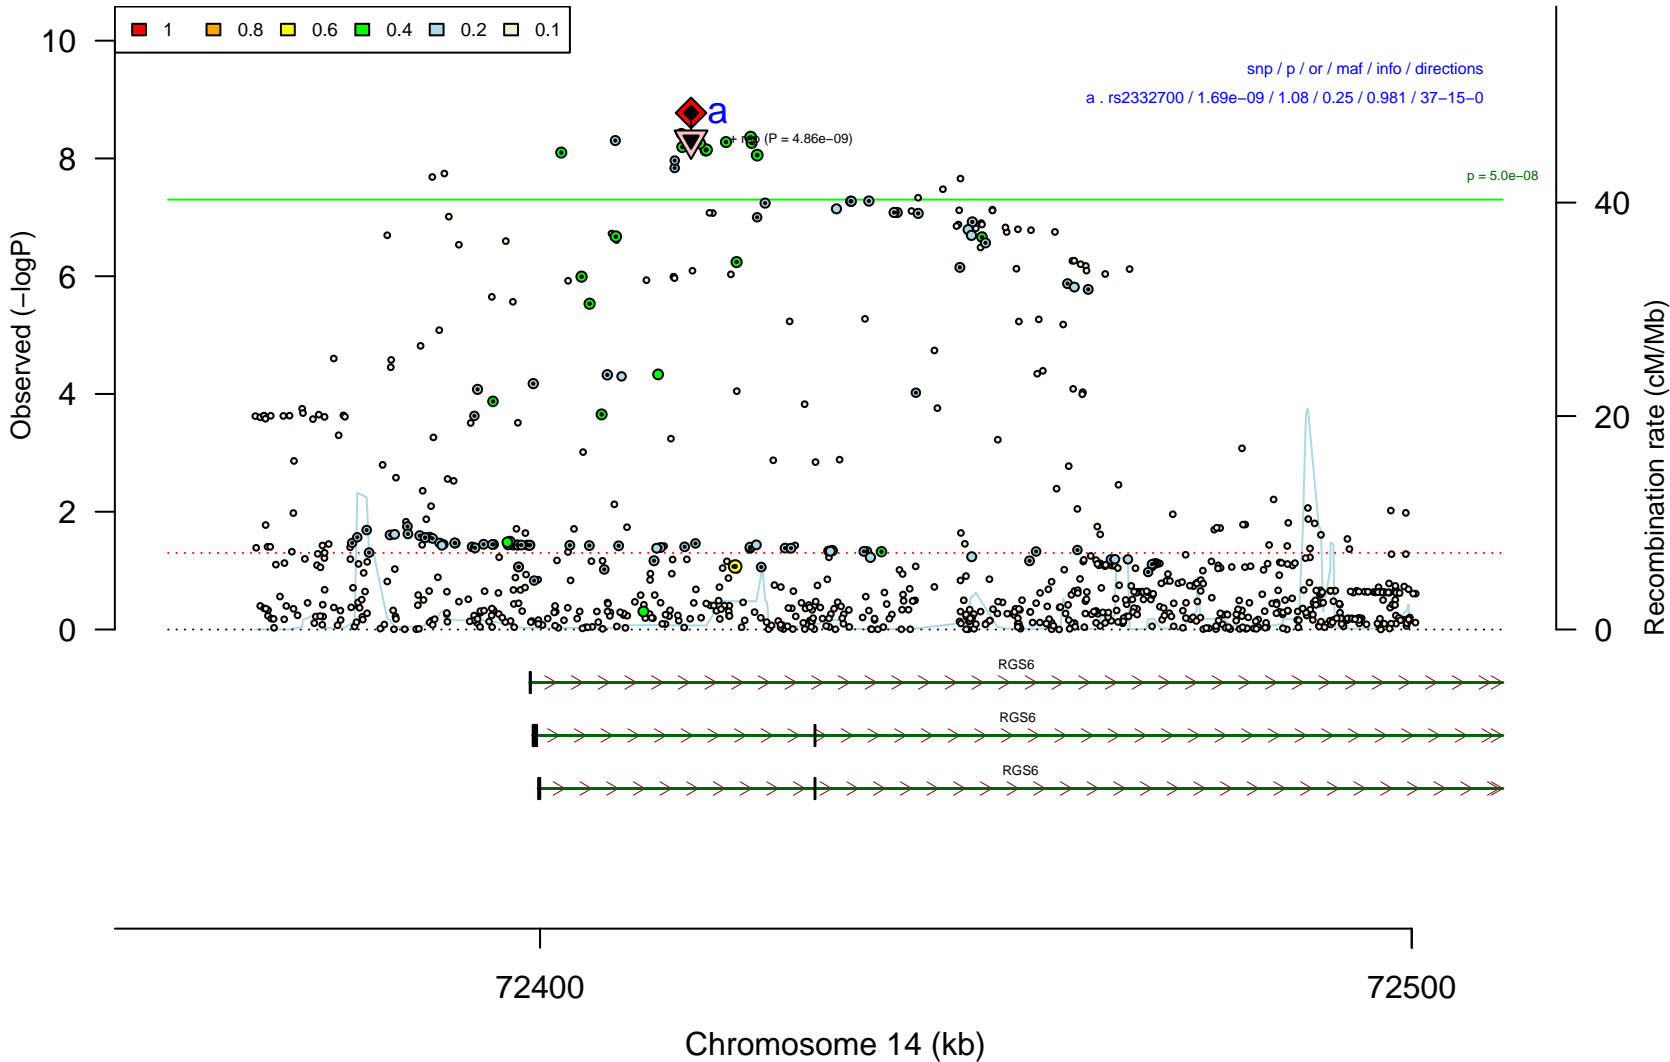

# PGC\_SCZ52.reg72

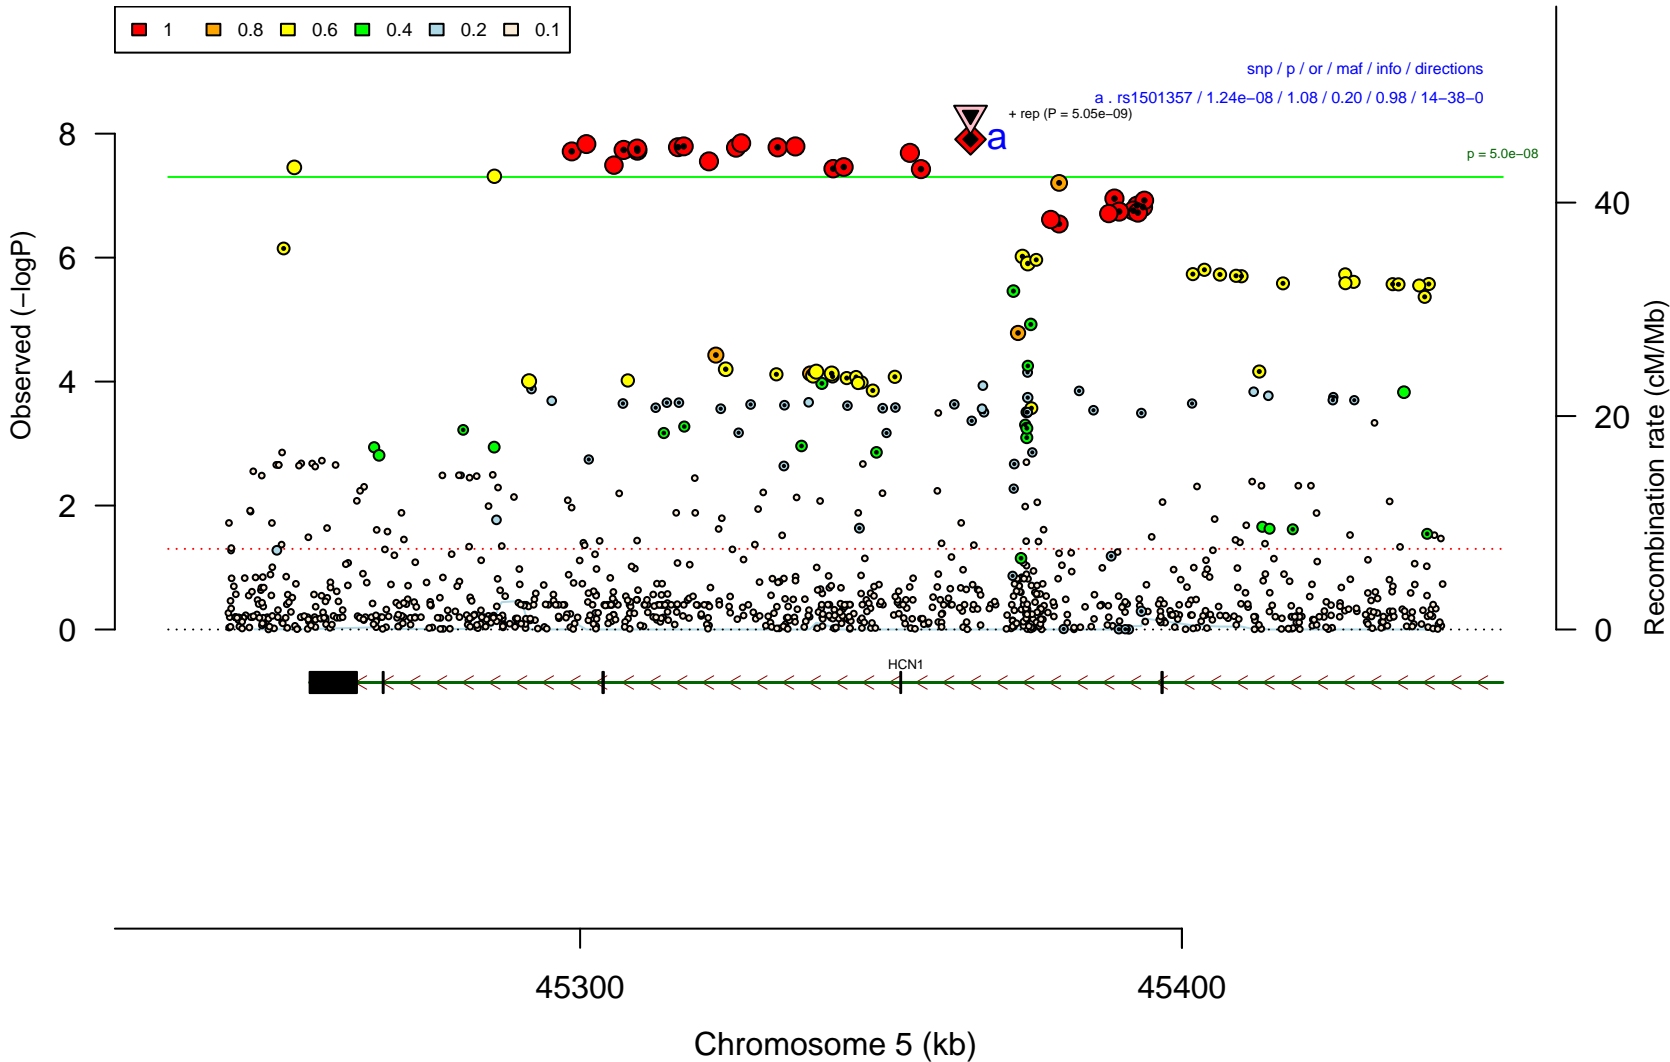



# PGC\_SCZ52.reg73

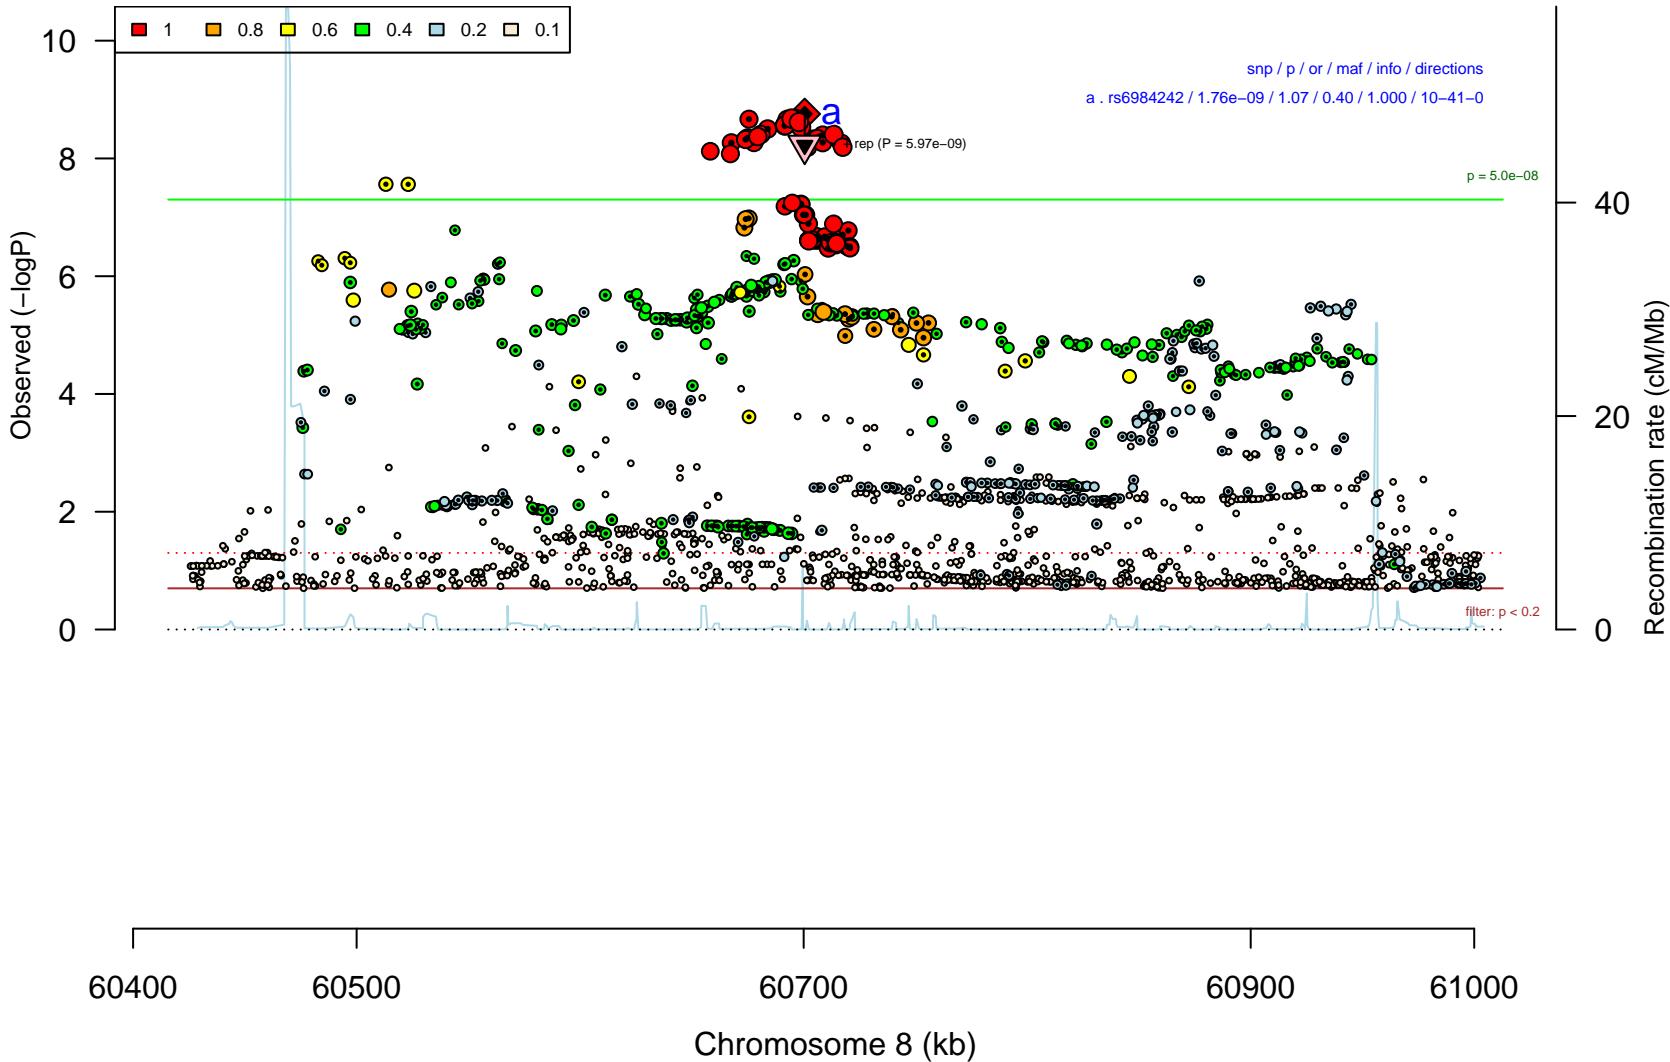

# PGC\_SCZ52.reg74

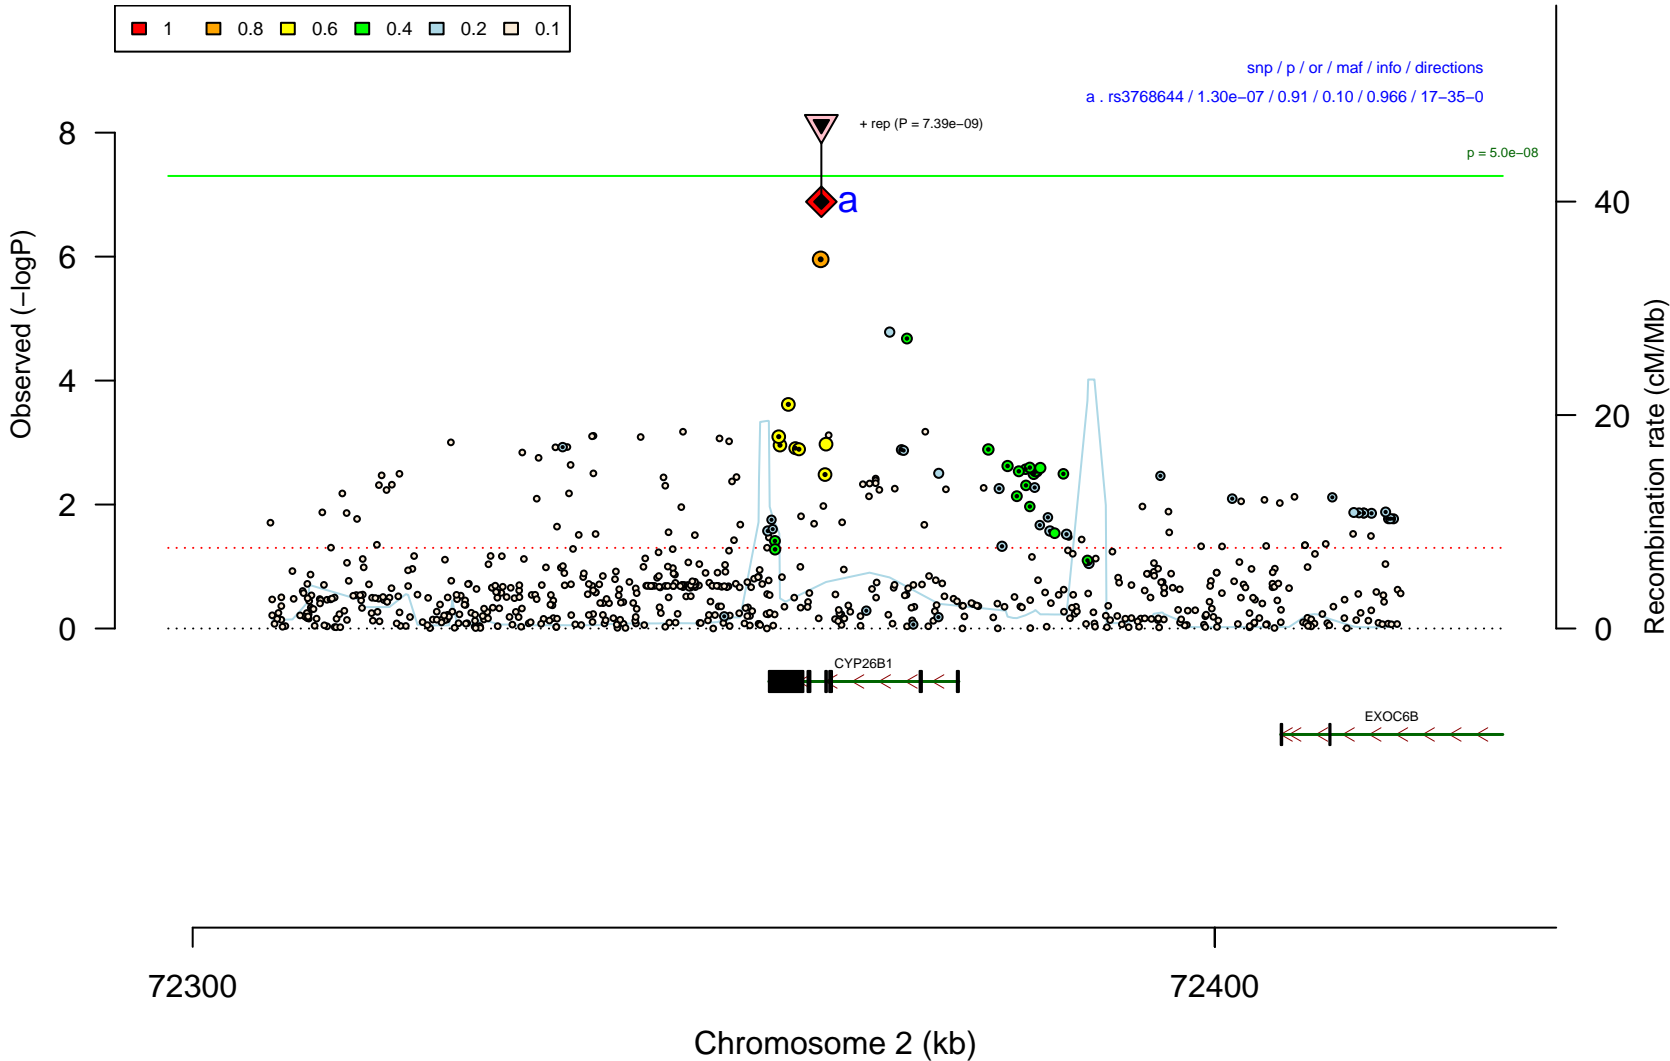

# PGC\_SCZ52.reg75

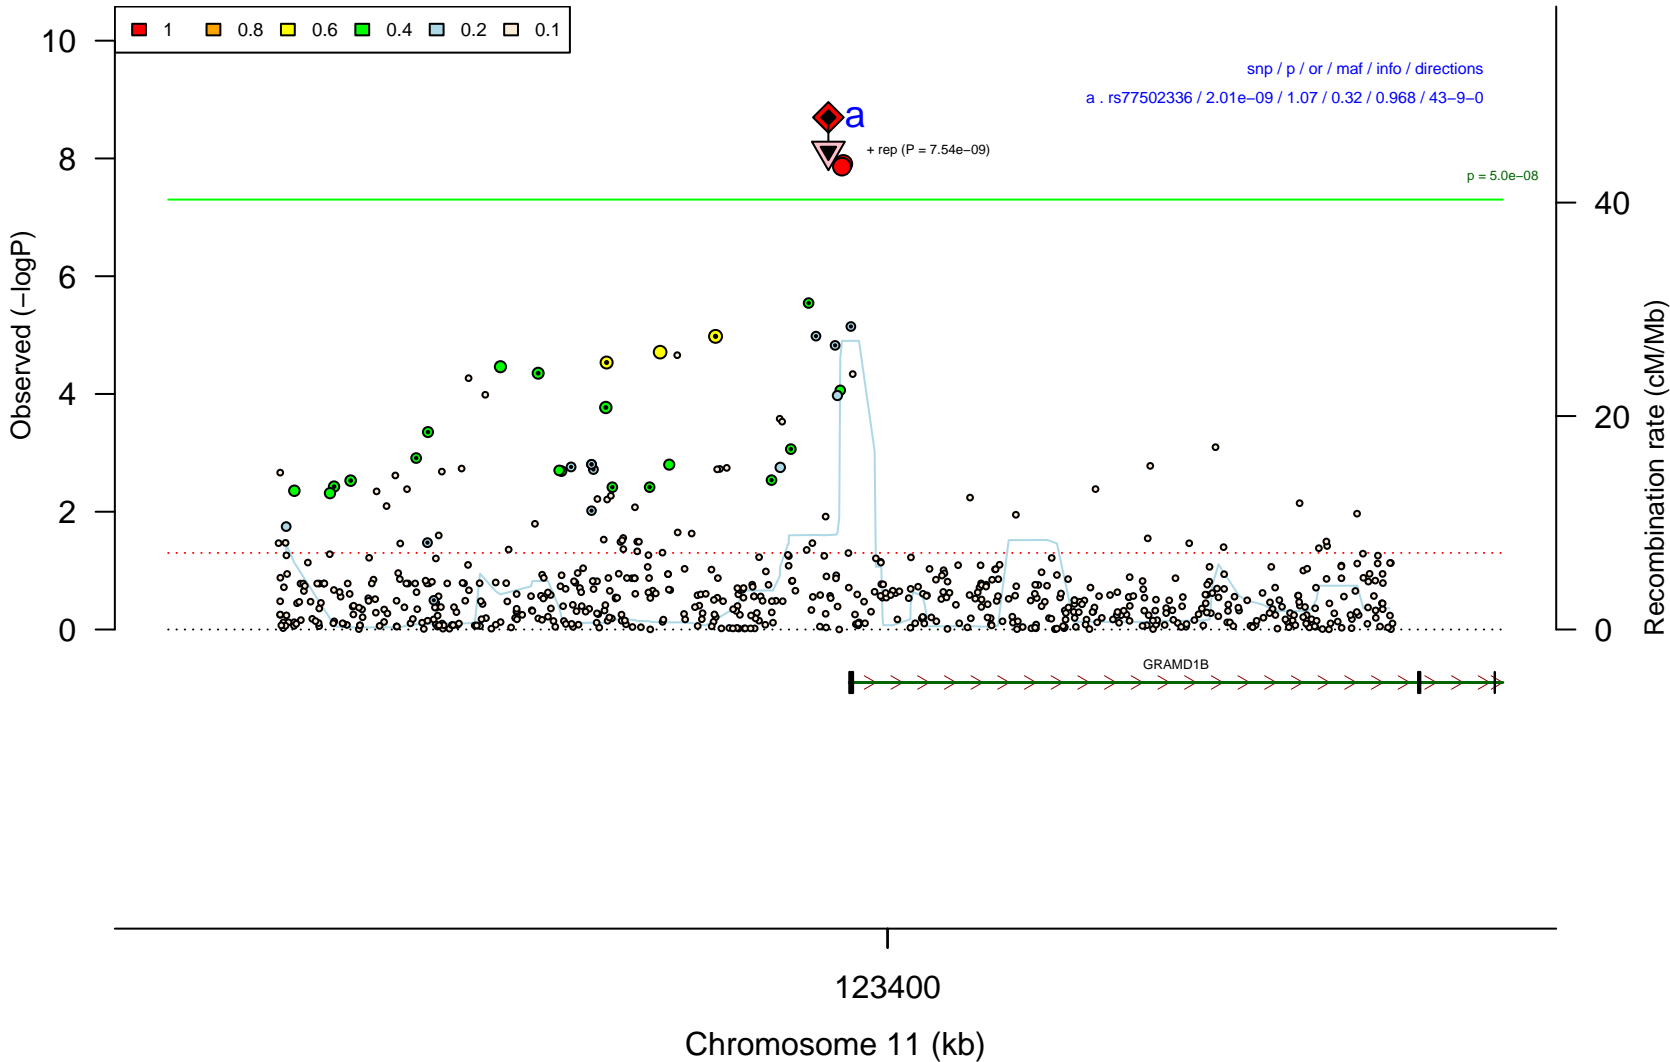

# PGC\_SCZ52.reg76

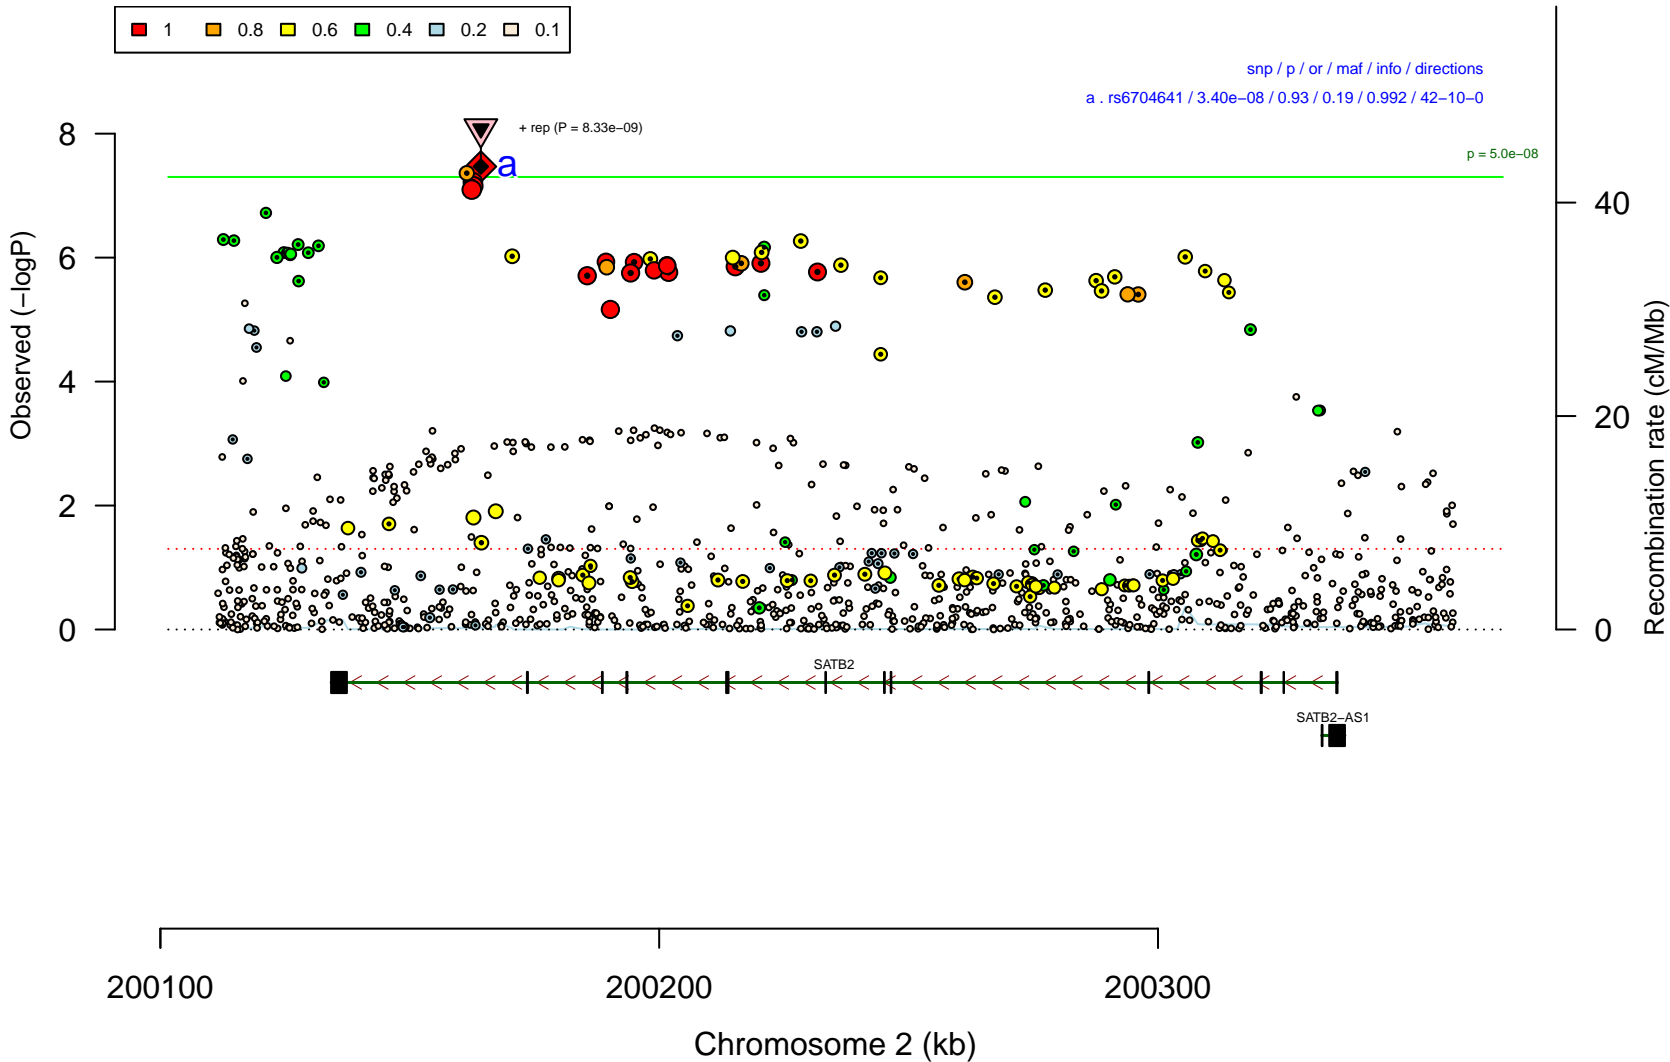

# PGC\_SCZ52.reg77



snp / p / or / maf / info / directions  
a . rs59979824 / 1.08e-08 / 0.94 / 0.34 / 0.929 / 10-42-0

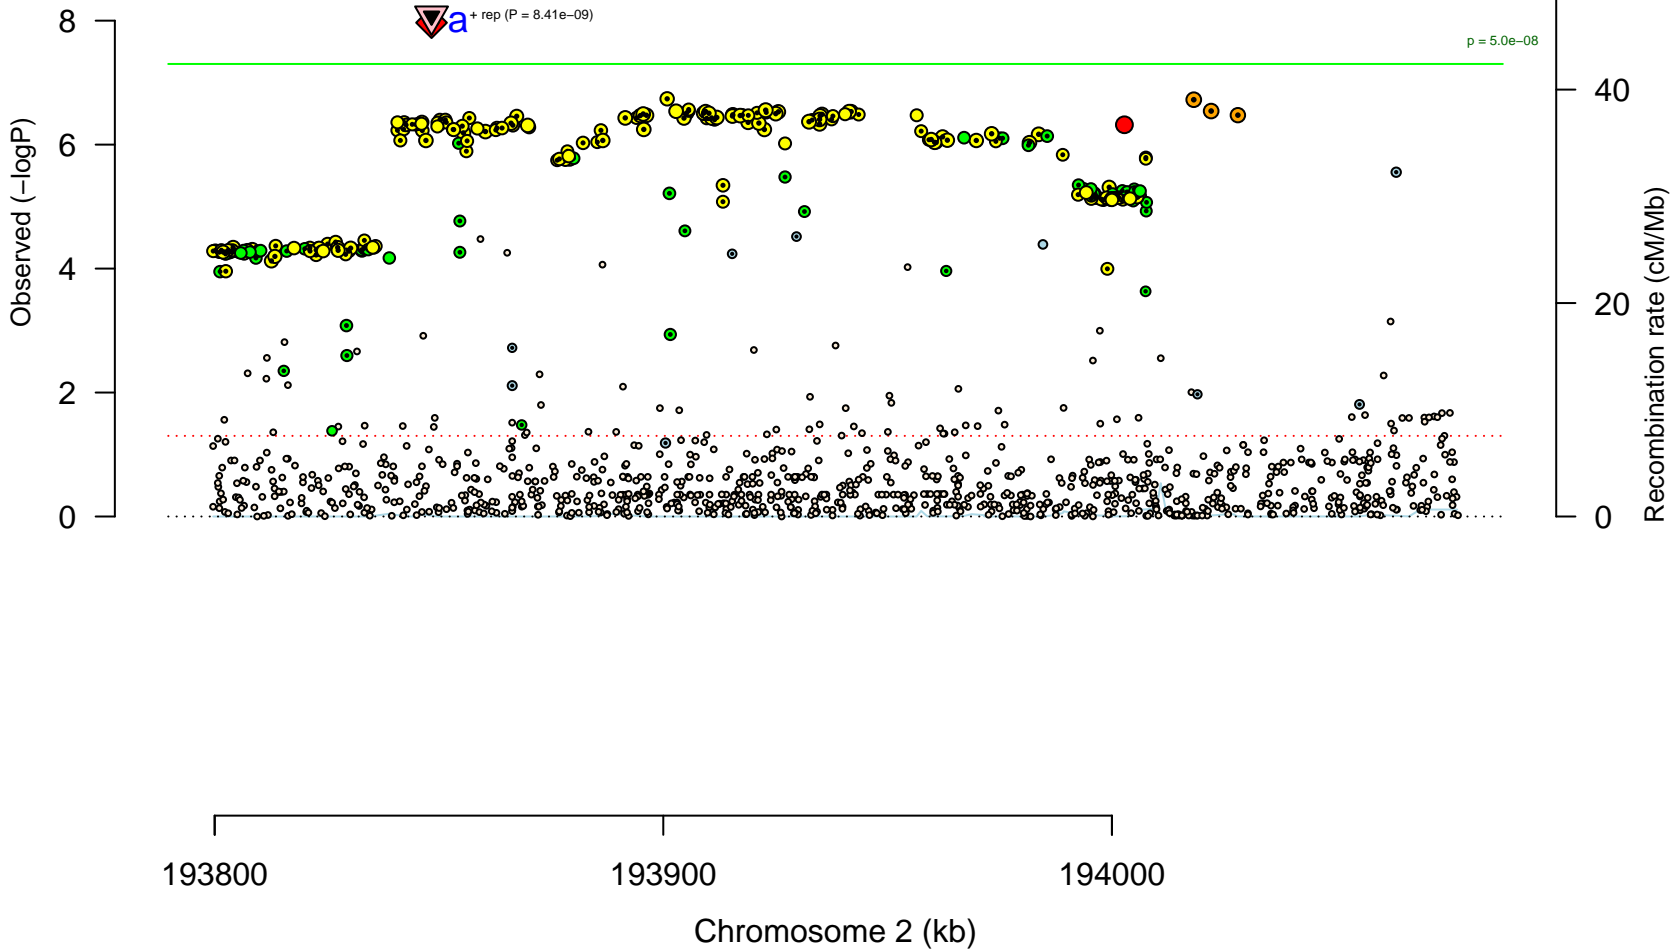

# PGC\_SCZ52.reg78

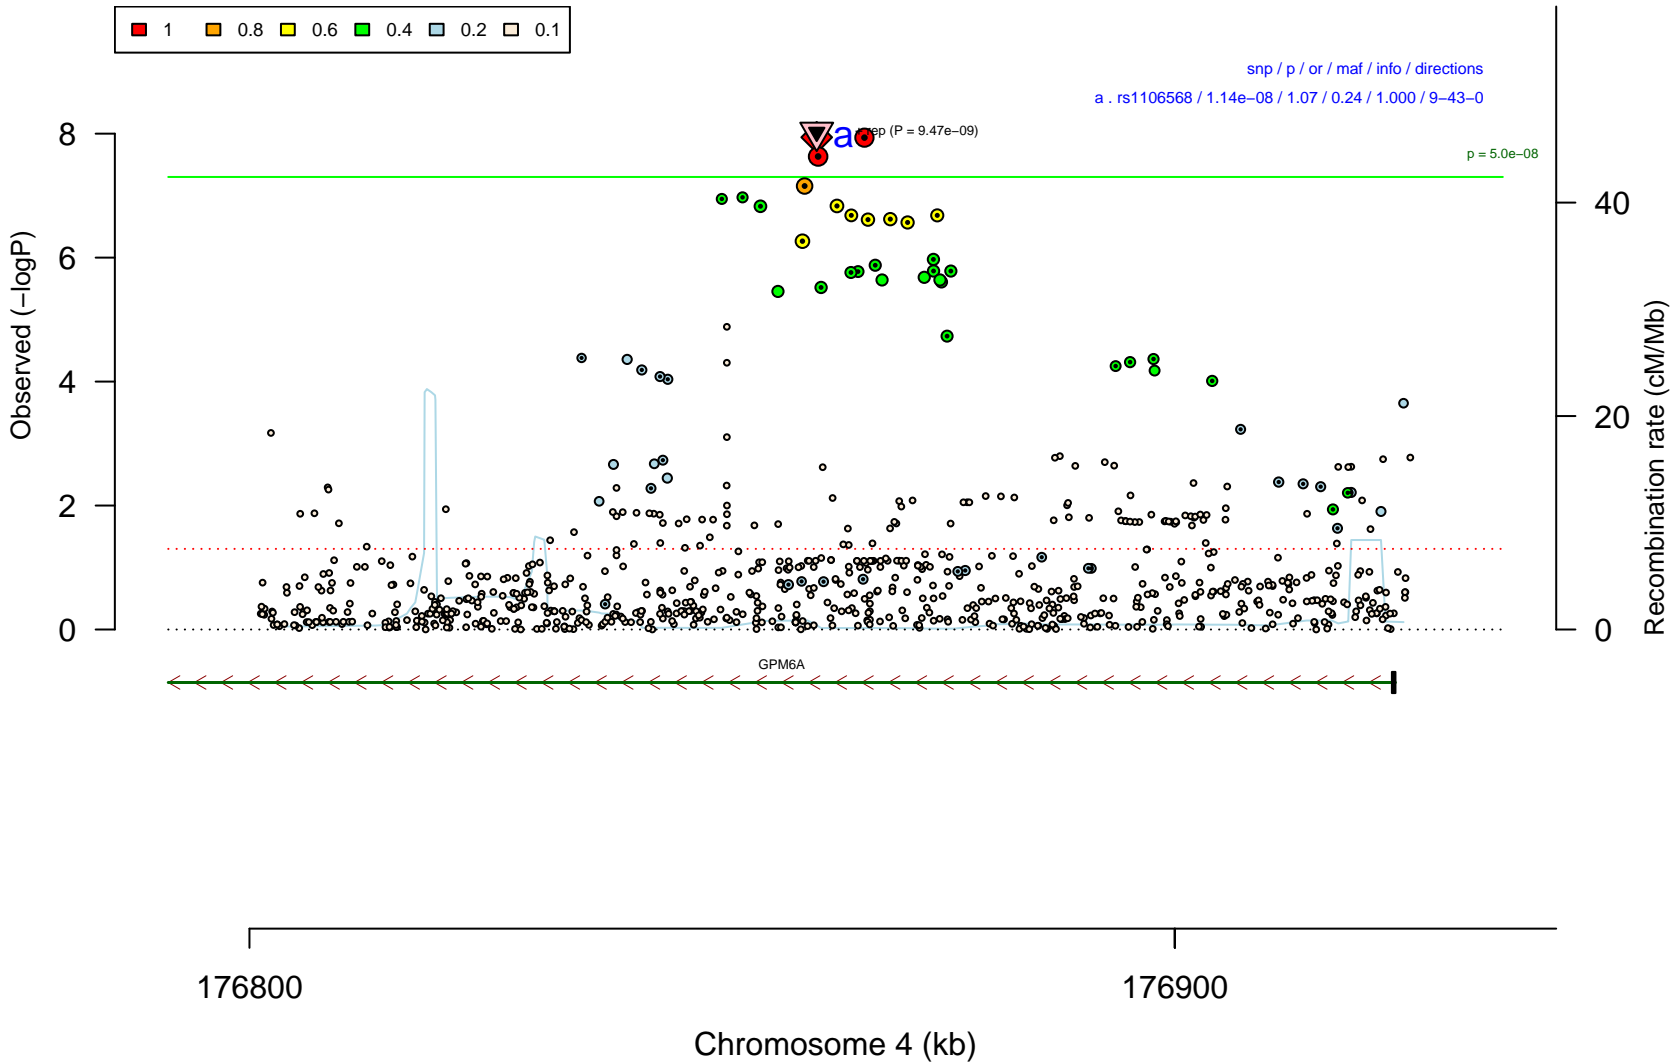

# PGC\_SCZ52.reg79

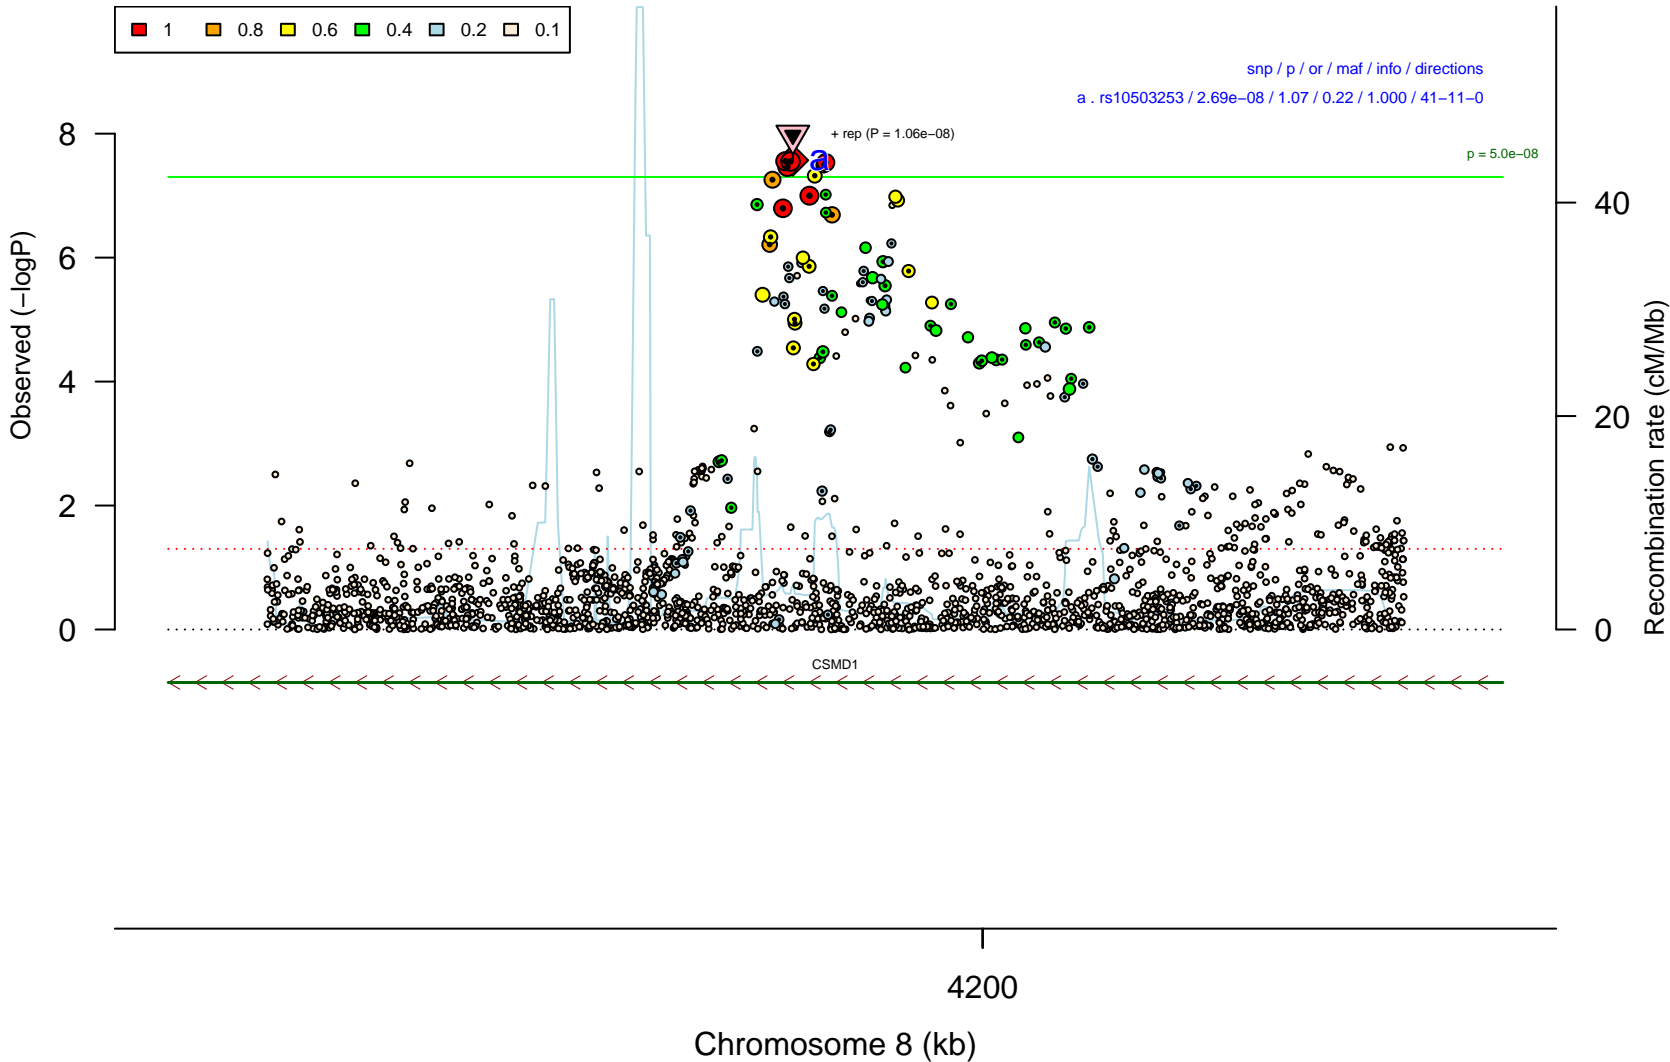

# PGC\_SCZ52.reg80

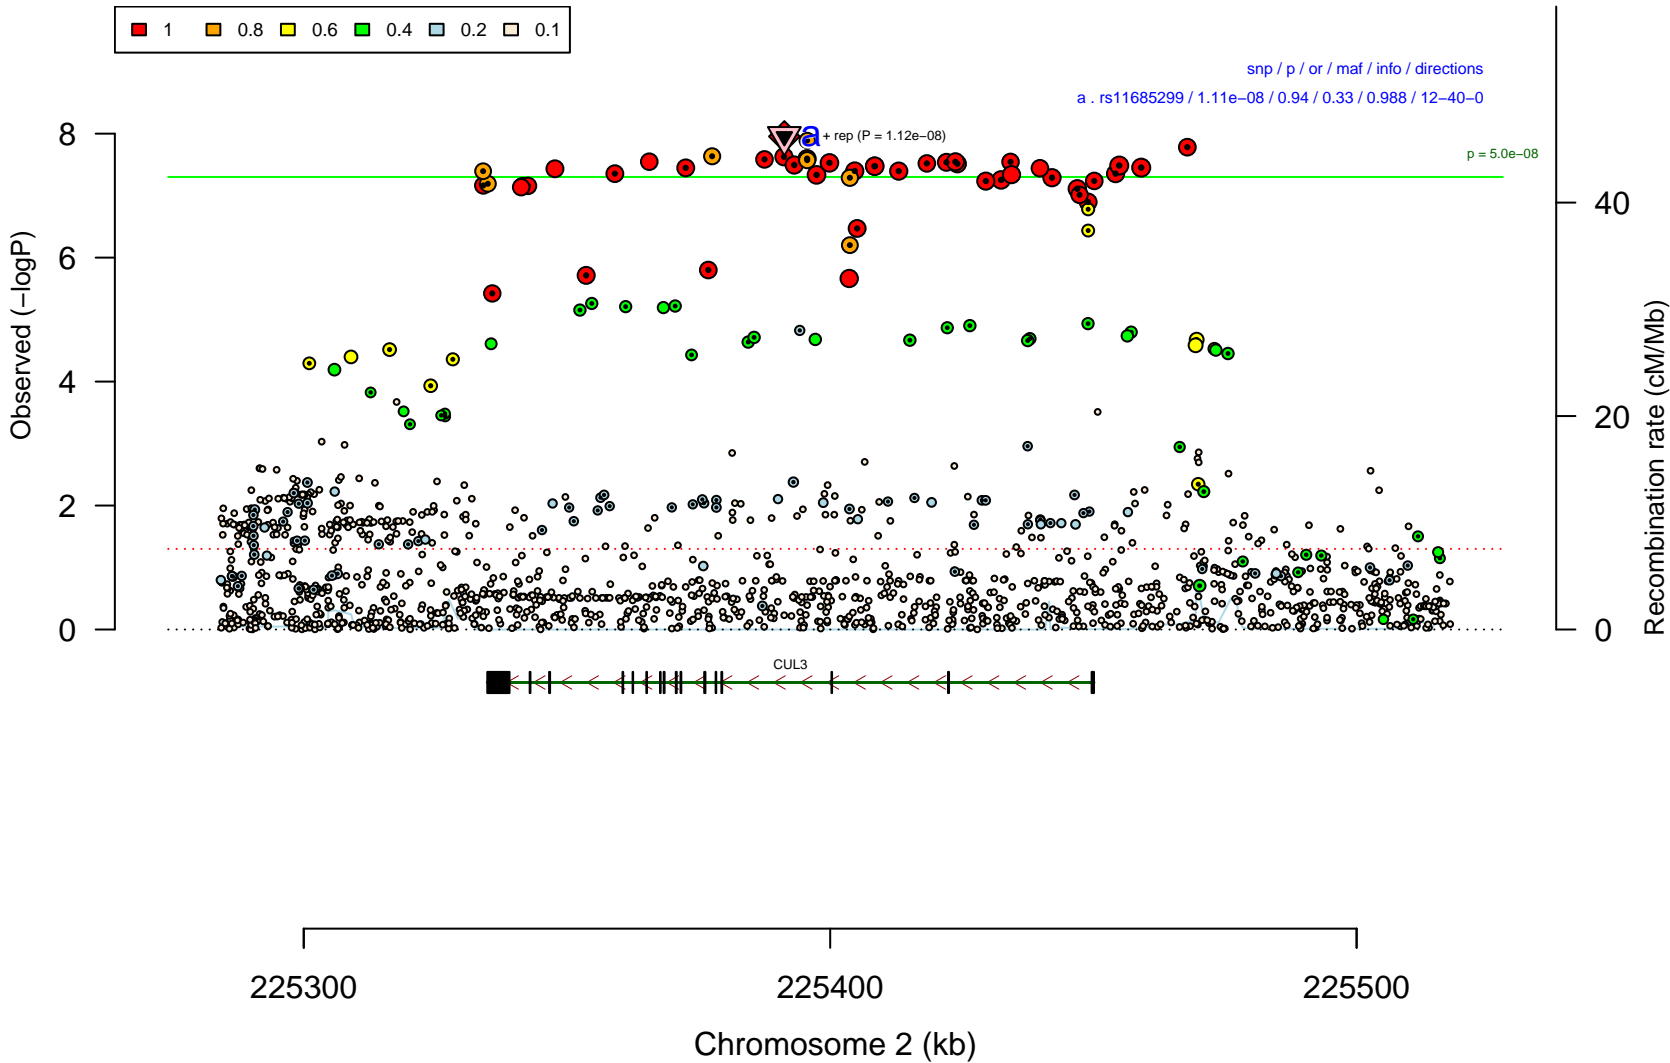



# PGC\_SCZ52.reg81

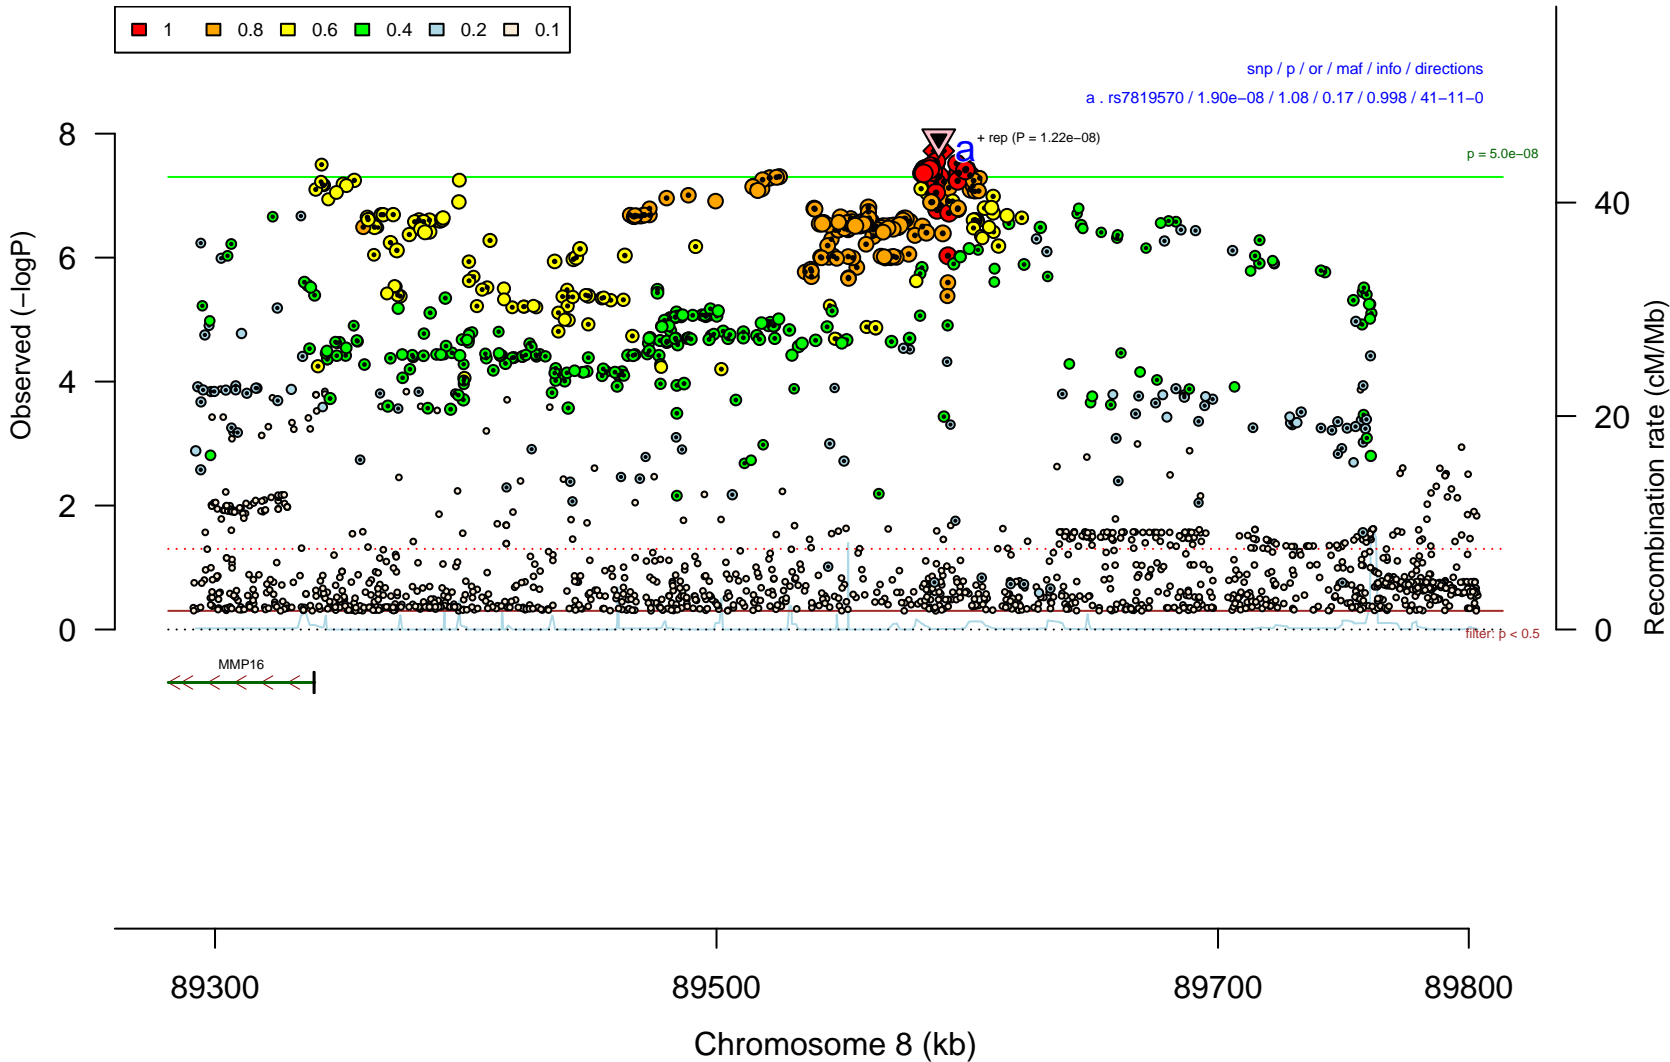

# PGC\_SCZ52.reg82

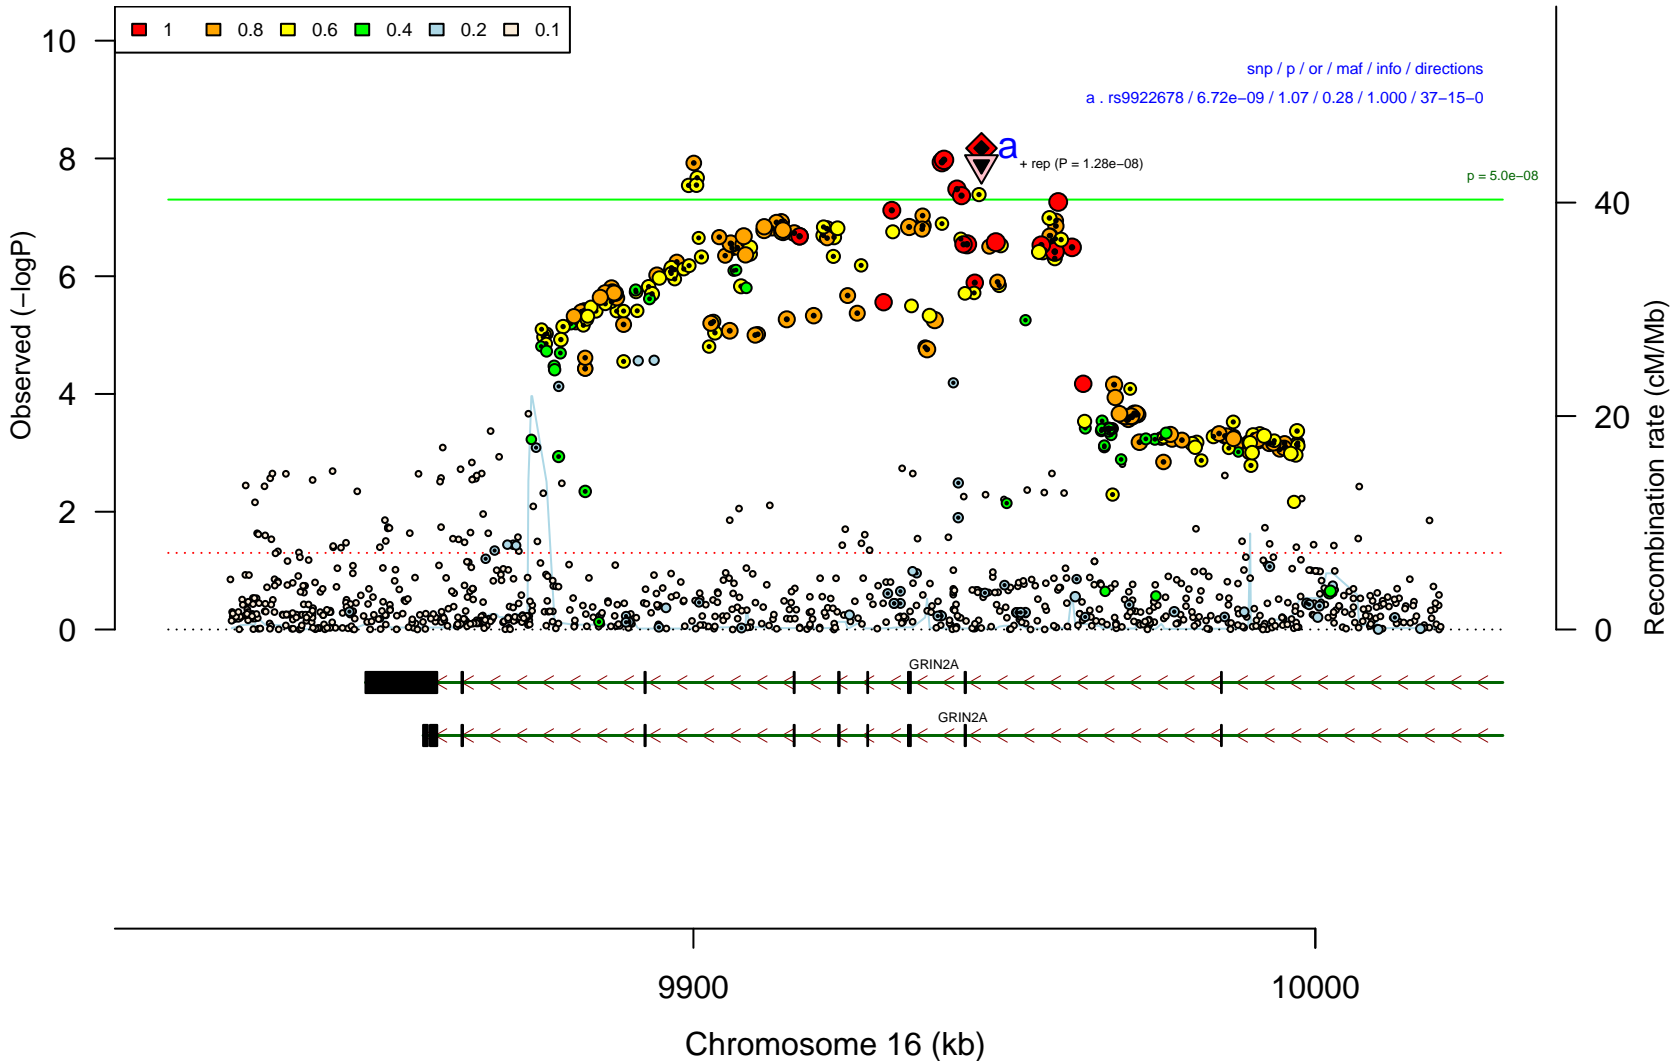

# PGC\_SCZ52.reg83

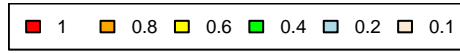

snp / p / or / maf / info / directions  
a . rs2068012 / 4.14e-08 / 1.07 / 0.23 / 0.973 / 10-42-0

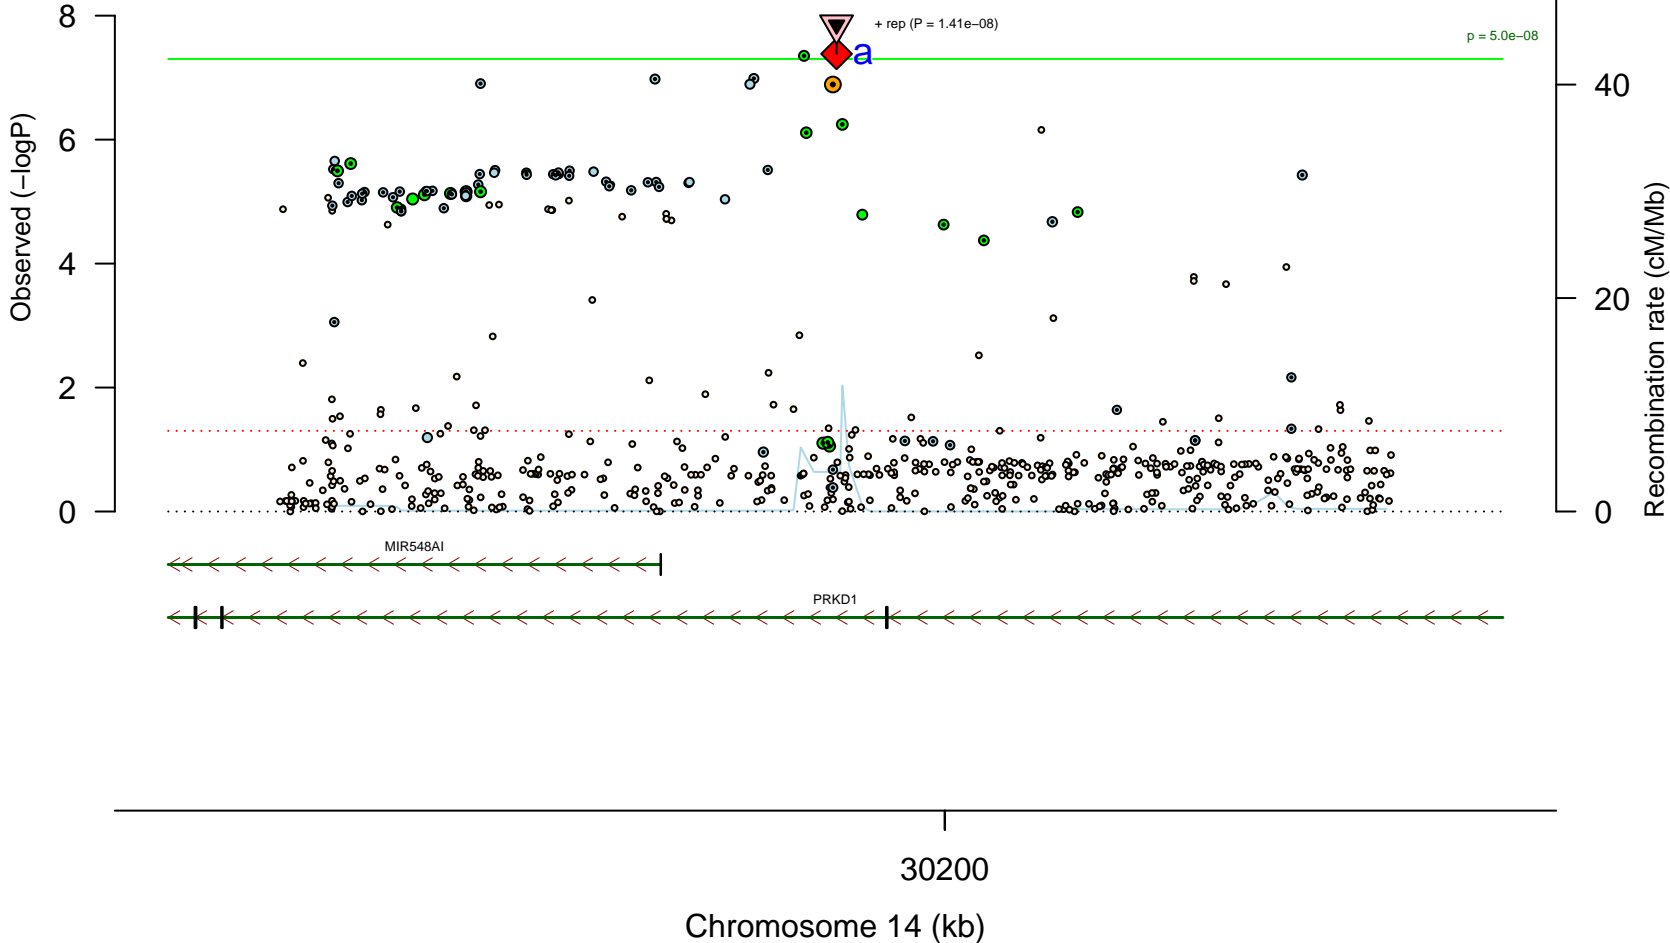

# PGC\_SCZ52.reg84

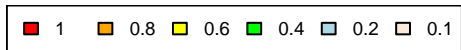

snp / p / or / maf / info / directions  
 a . rs832187 / 2.58e-08 / 1.06 / 0.39 / 0.985 / 12-40-0

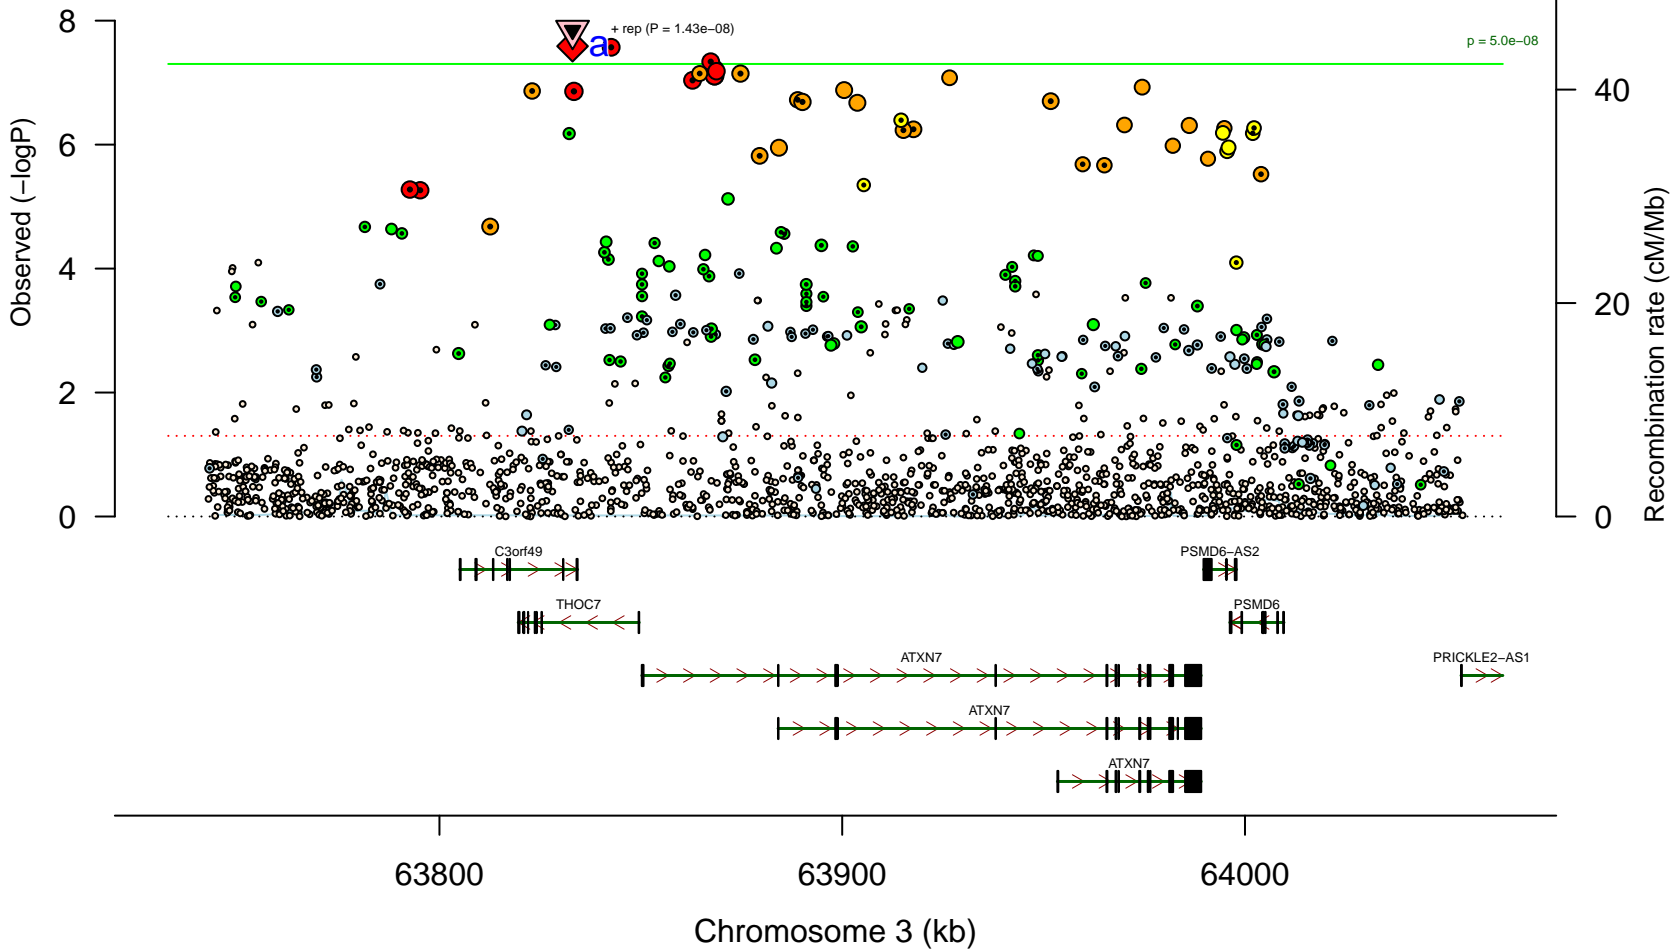

# PGC\_SCZ52.reg85

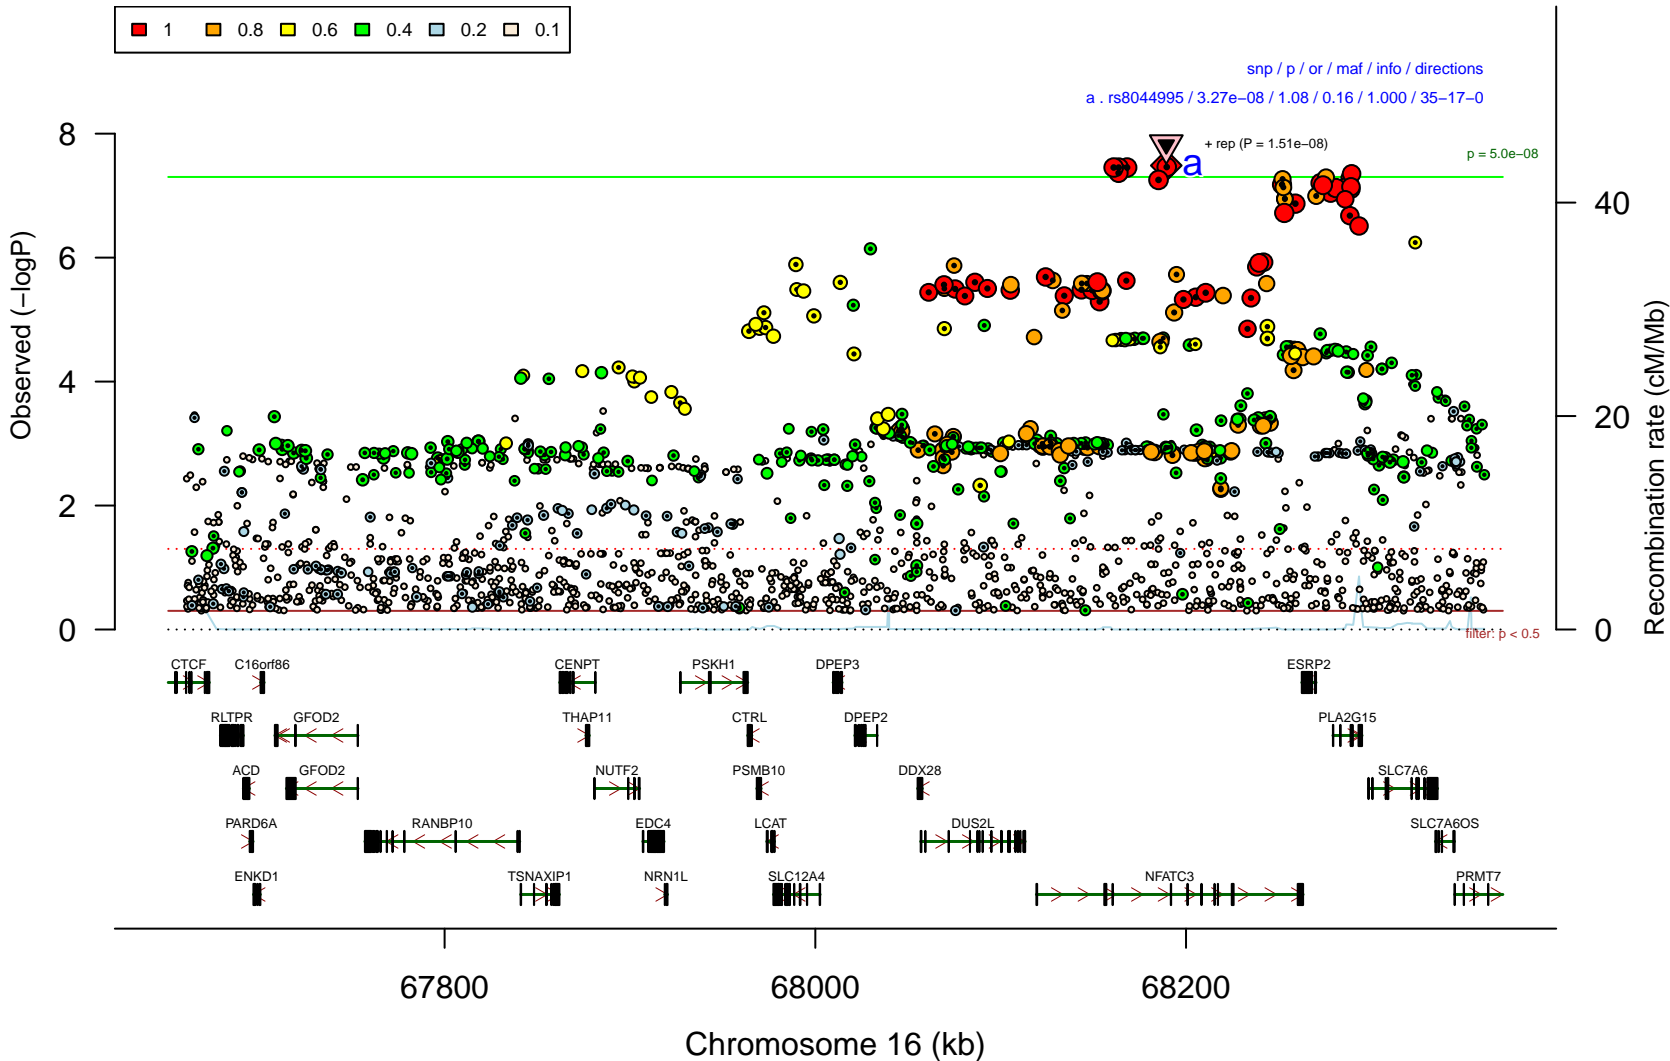

# PGC\_SCZ52.reg86



snp / p / or / maf / info / directions  
a . chr2\_149429178\_D / 2.62e-08 / 1.17 / 0.04 / 0.94 / 35-14-3

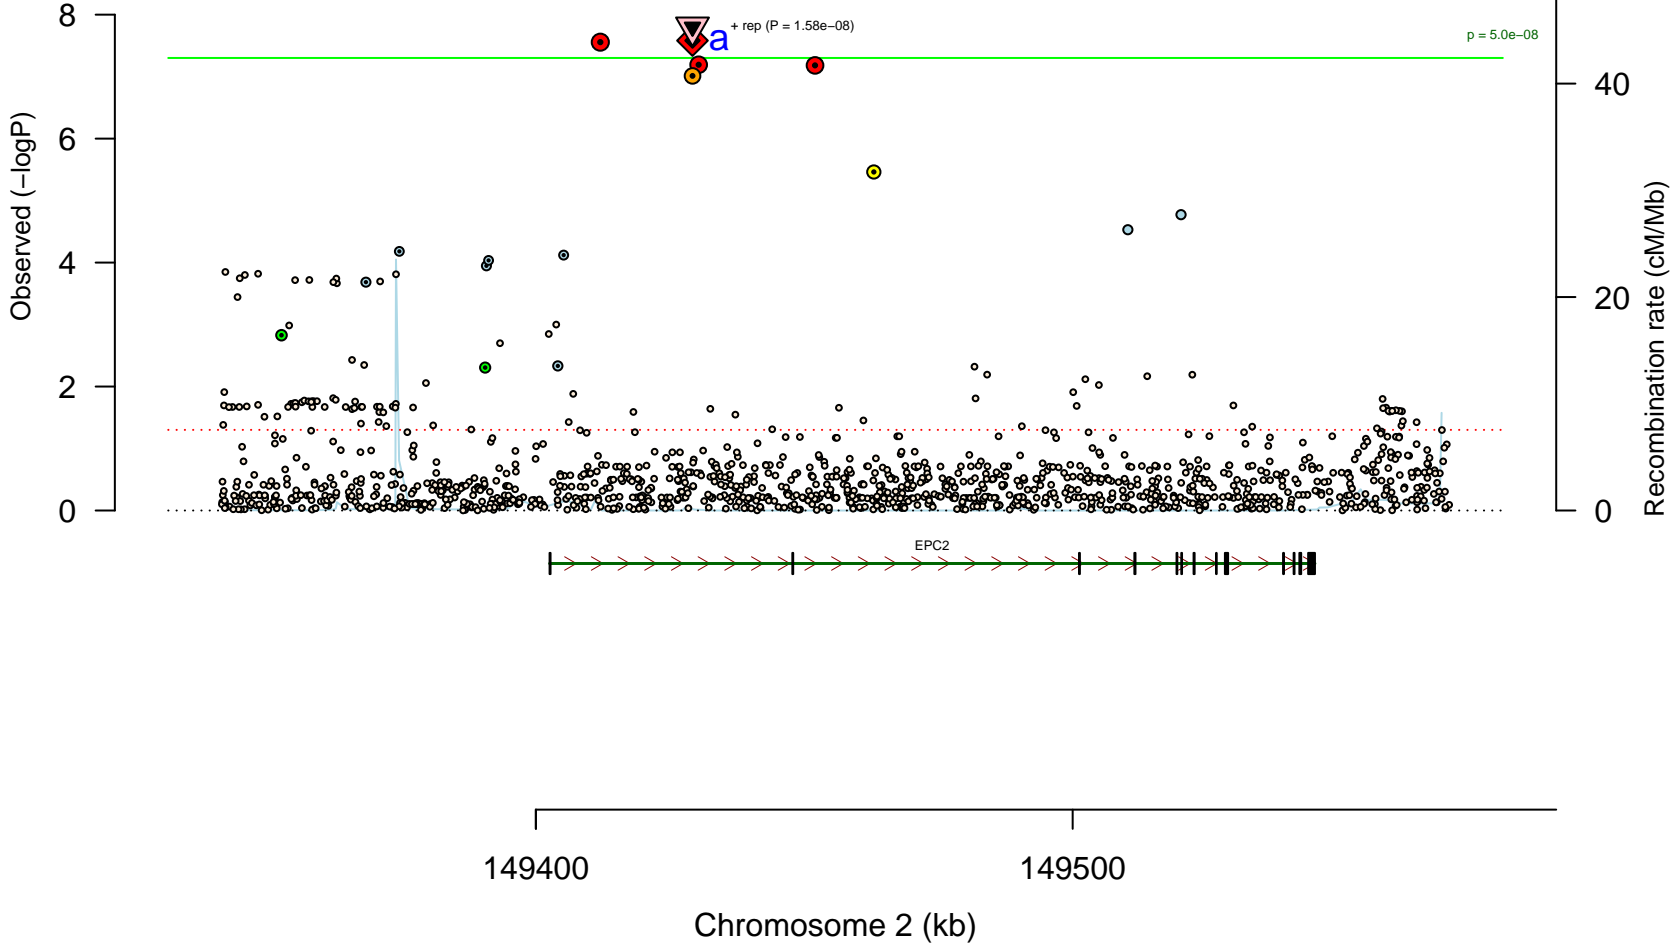

# PGC\_SCZ52.reg87

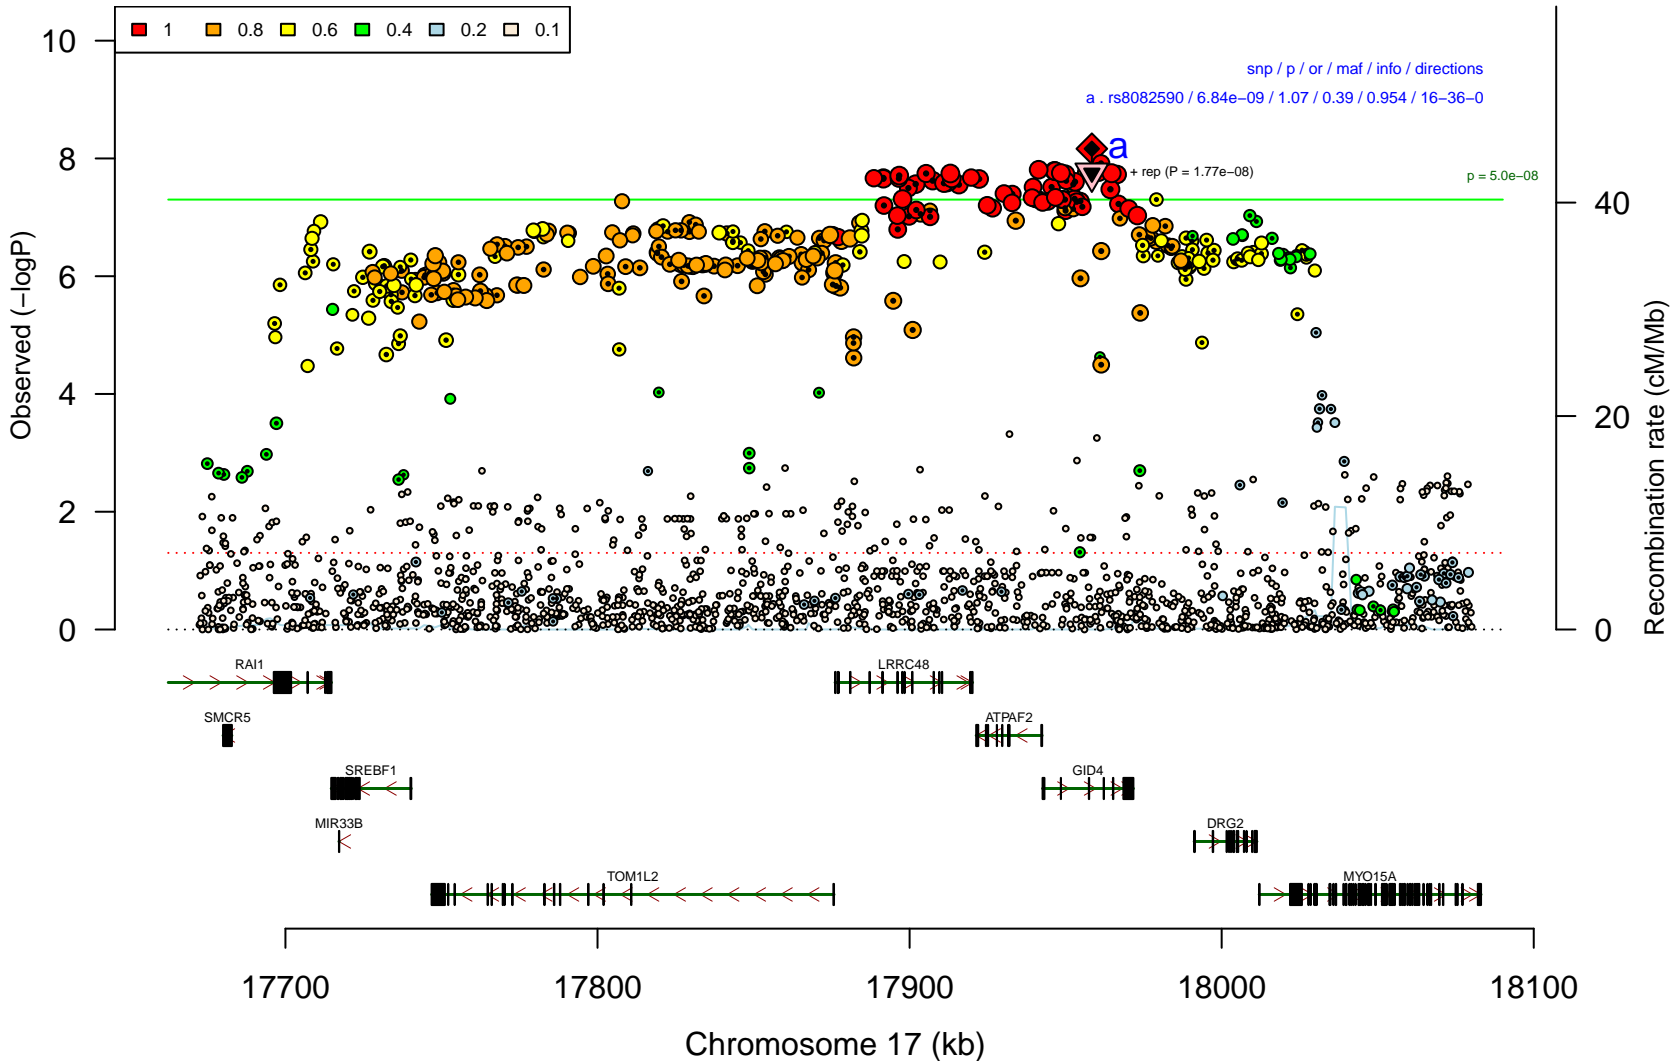

# PGC\_SCZ52.reg88



snp / p / or / maf / info / directions  
a . rs12148337 / 5.33e-08 / 1.06 / 0.47 / 0.999 / 37-15-0

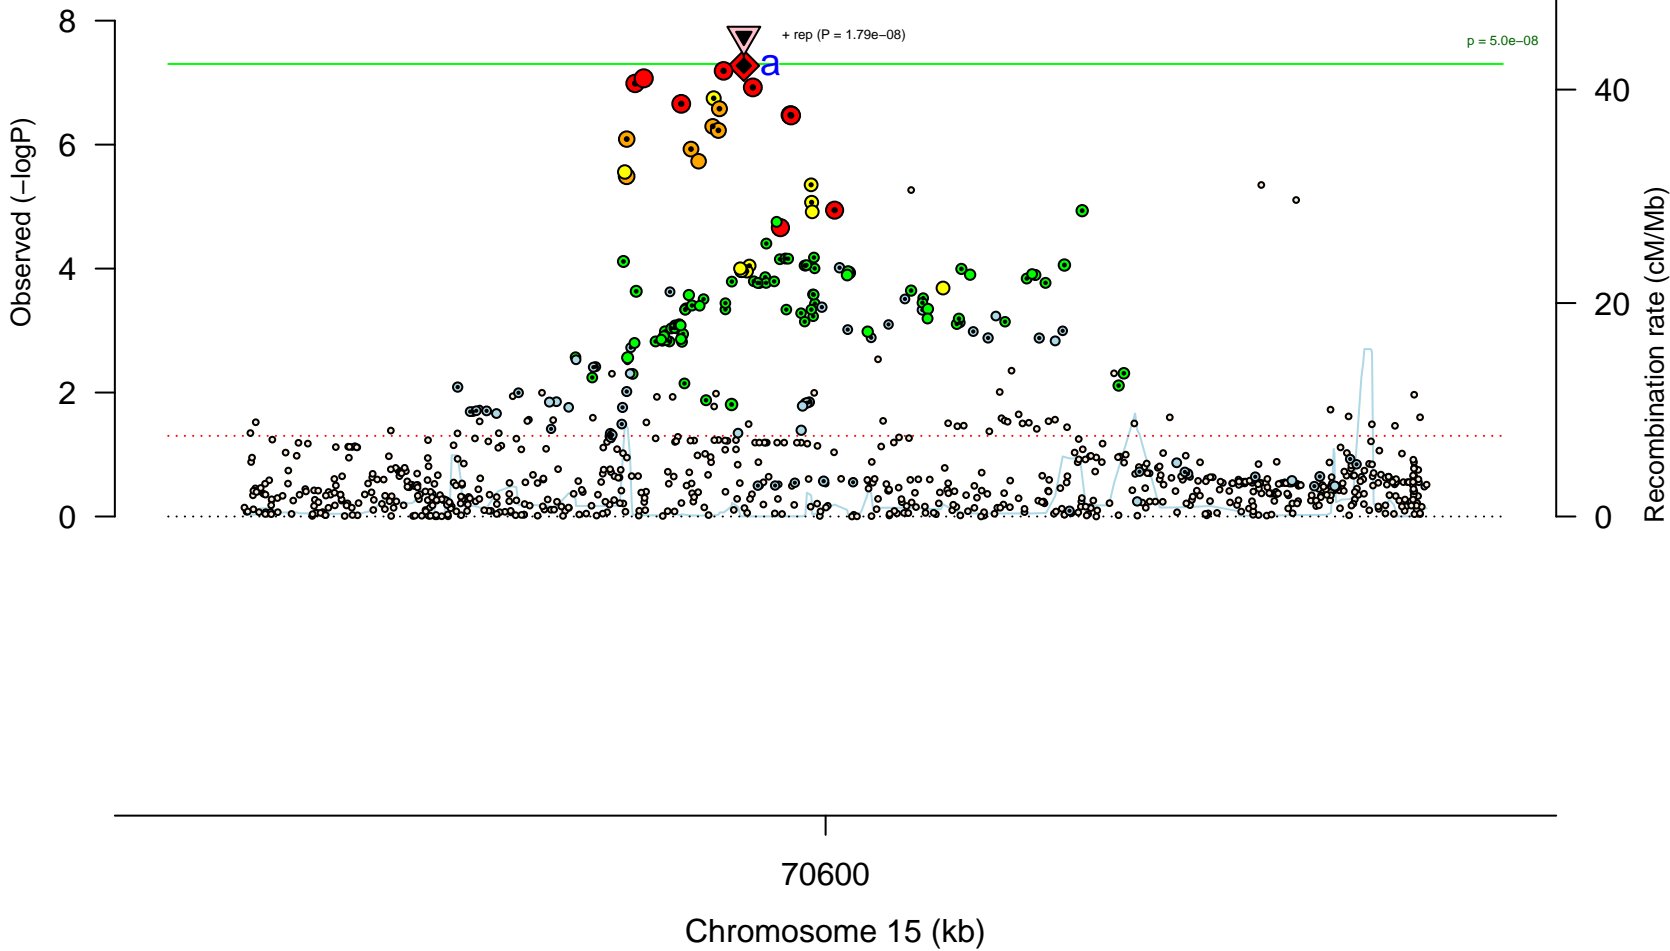



# PGC\_SCZ52.reg89

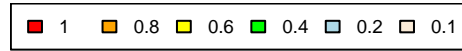

snp / p / or / maf / info / directions

a . rs12325245 / 1.15e-08 / 1.09 / 0.14 / 0.953 / 13-39-0

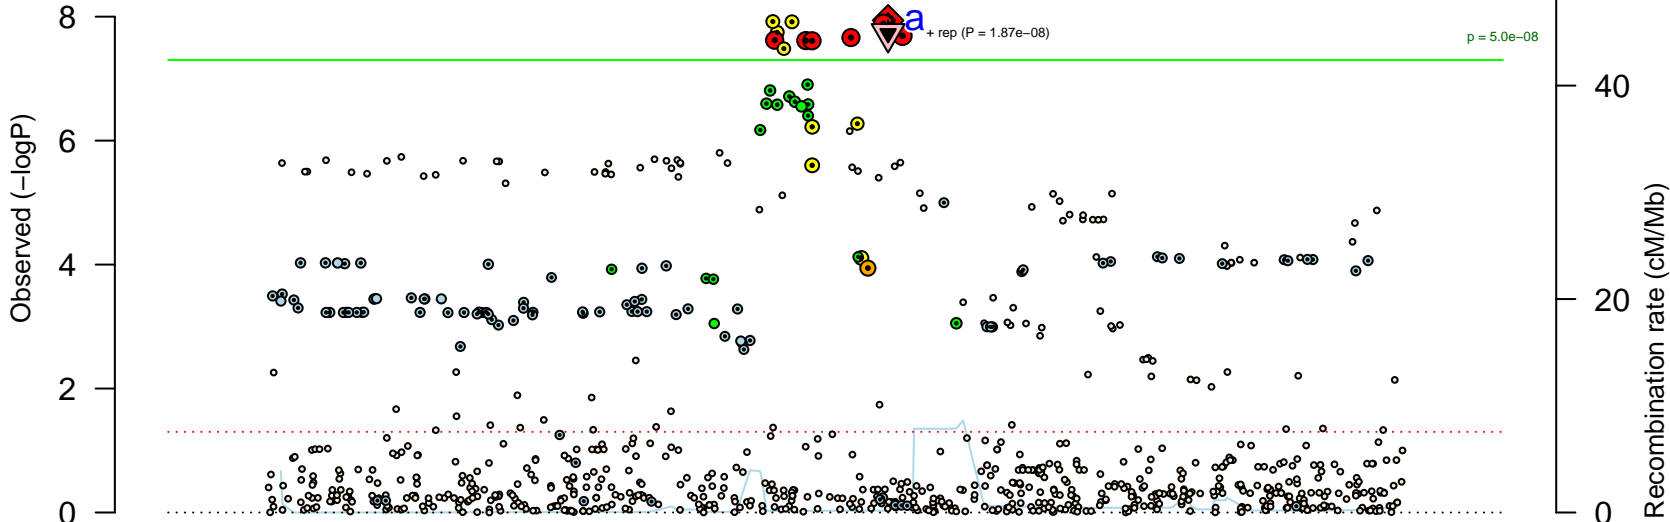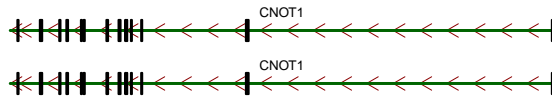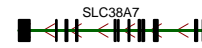

58700

Chromosome 16 (kb)

# PGC\_SCZ52.reg90

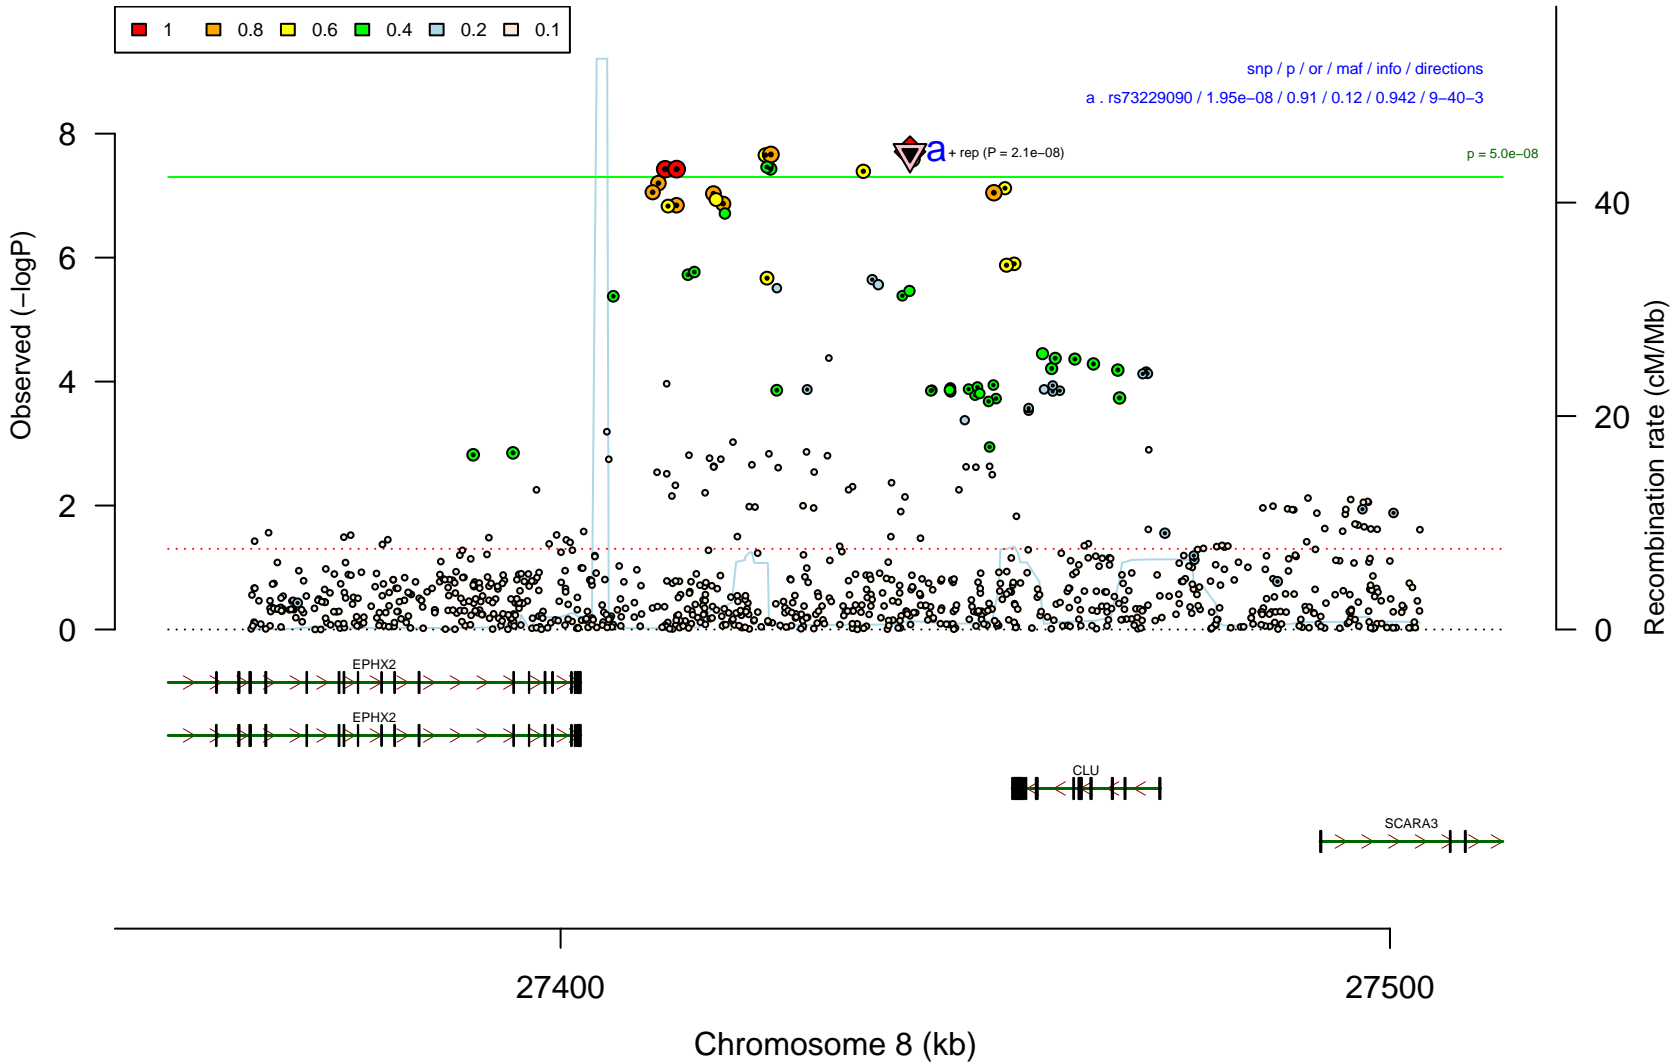

# PGC\_SCZ52.reg91

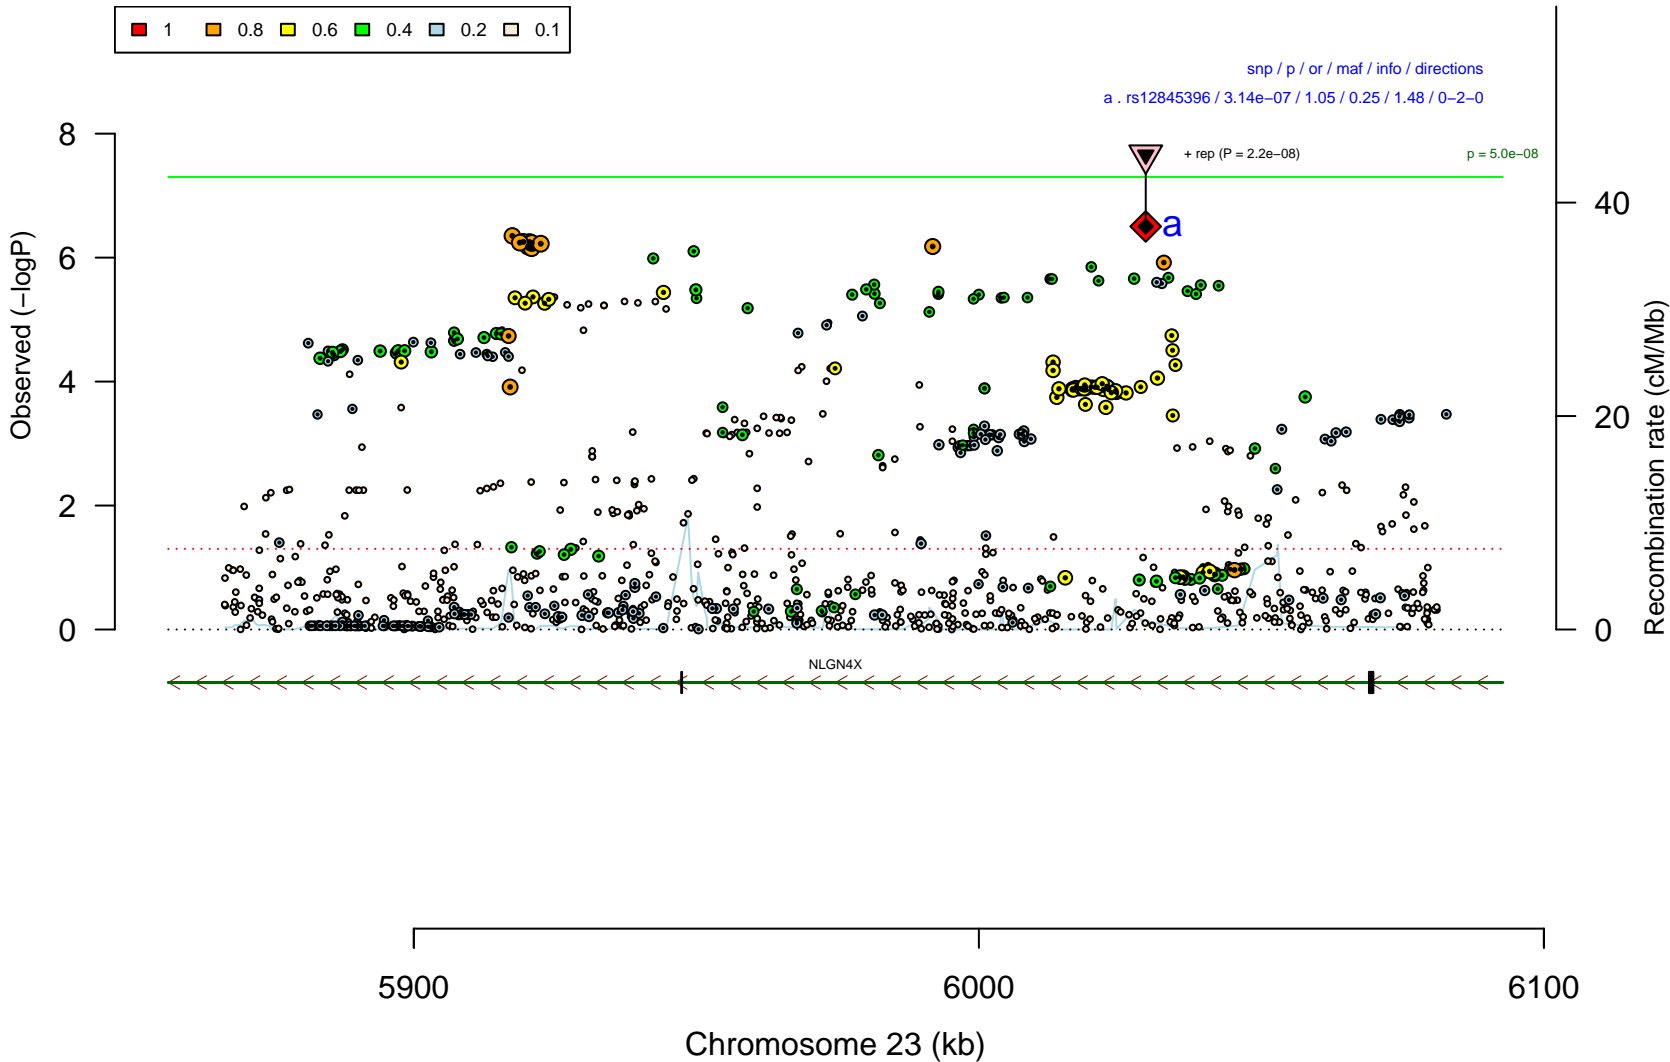

# PGC\_SCZ52.reg92

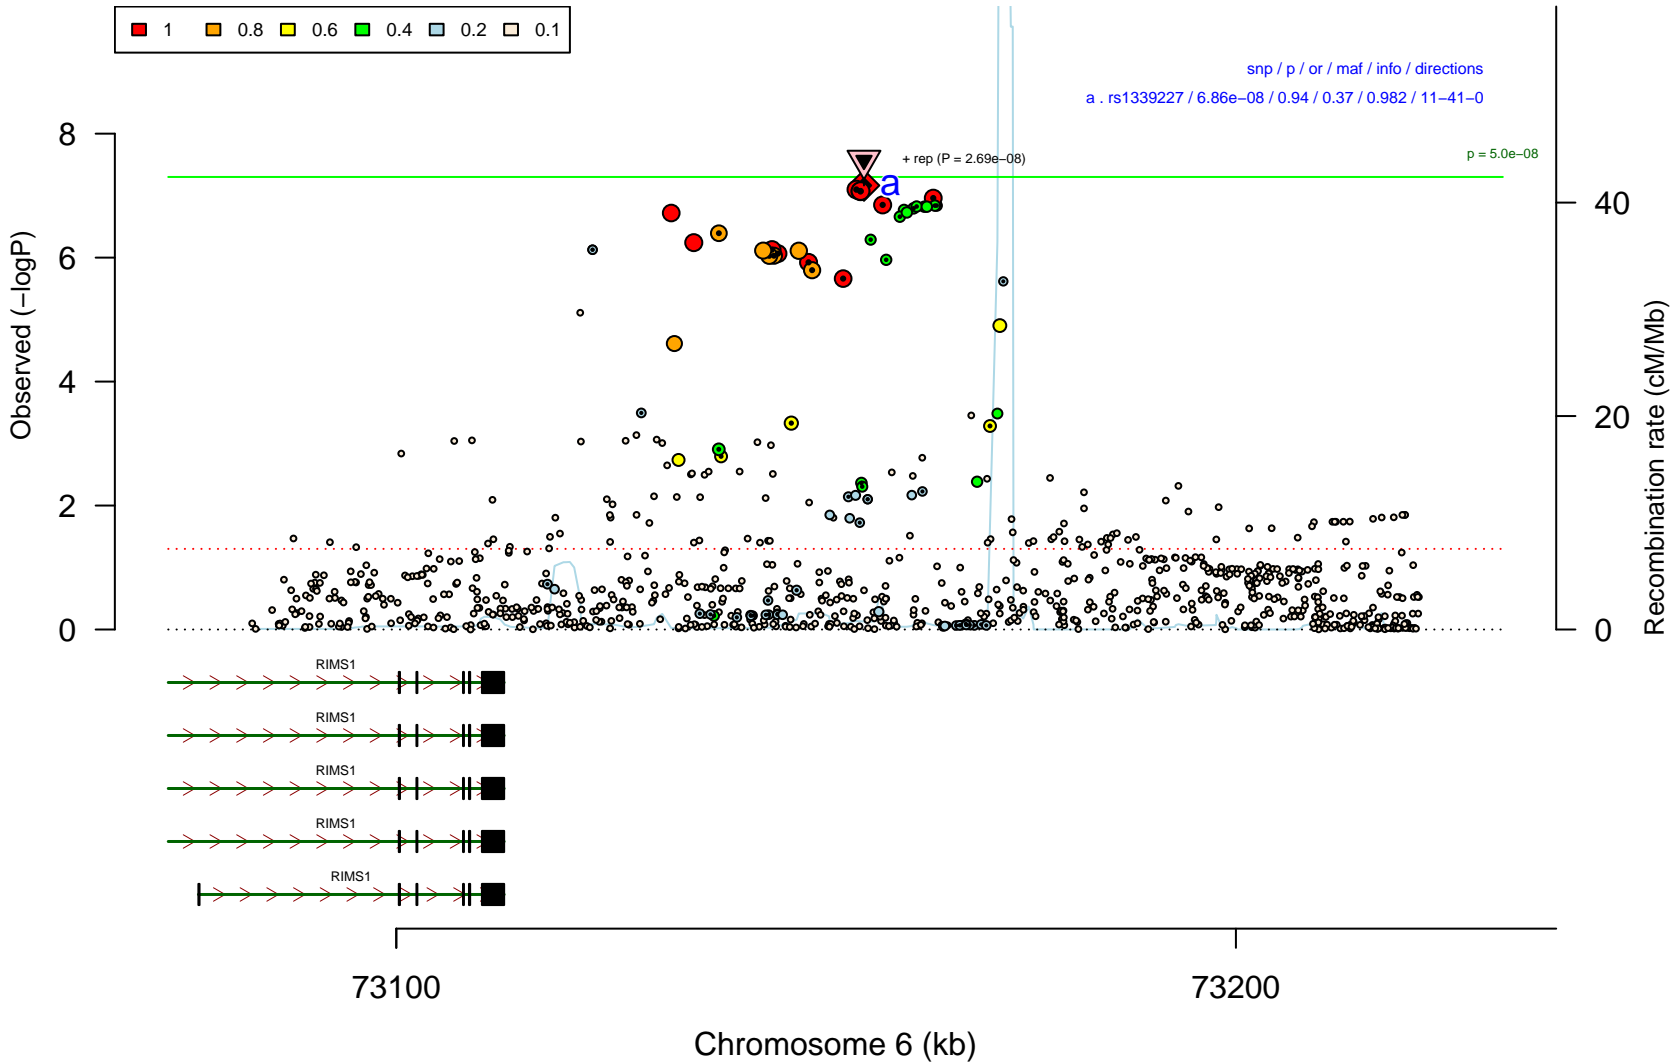

# PGC\_SCZ52.reg93

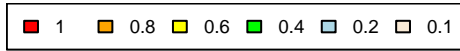

snp / p / or / maf / info / directions  
a . chr7\_24747494\_D / 3.59e-07 / 1.09 / 0.10 / 0.974 / 38-14-0

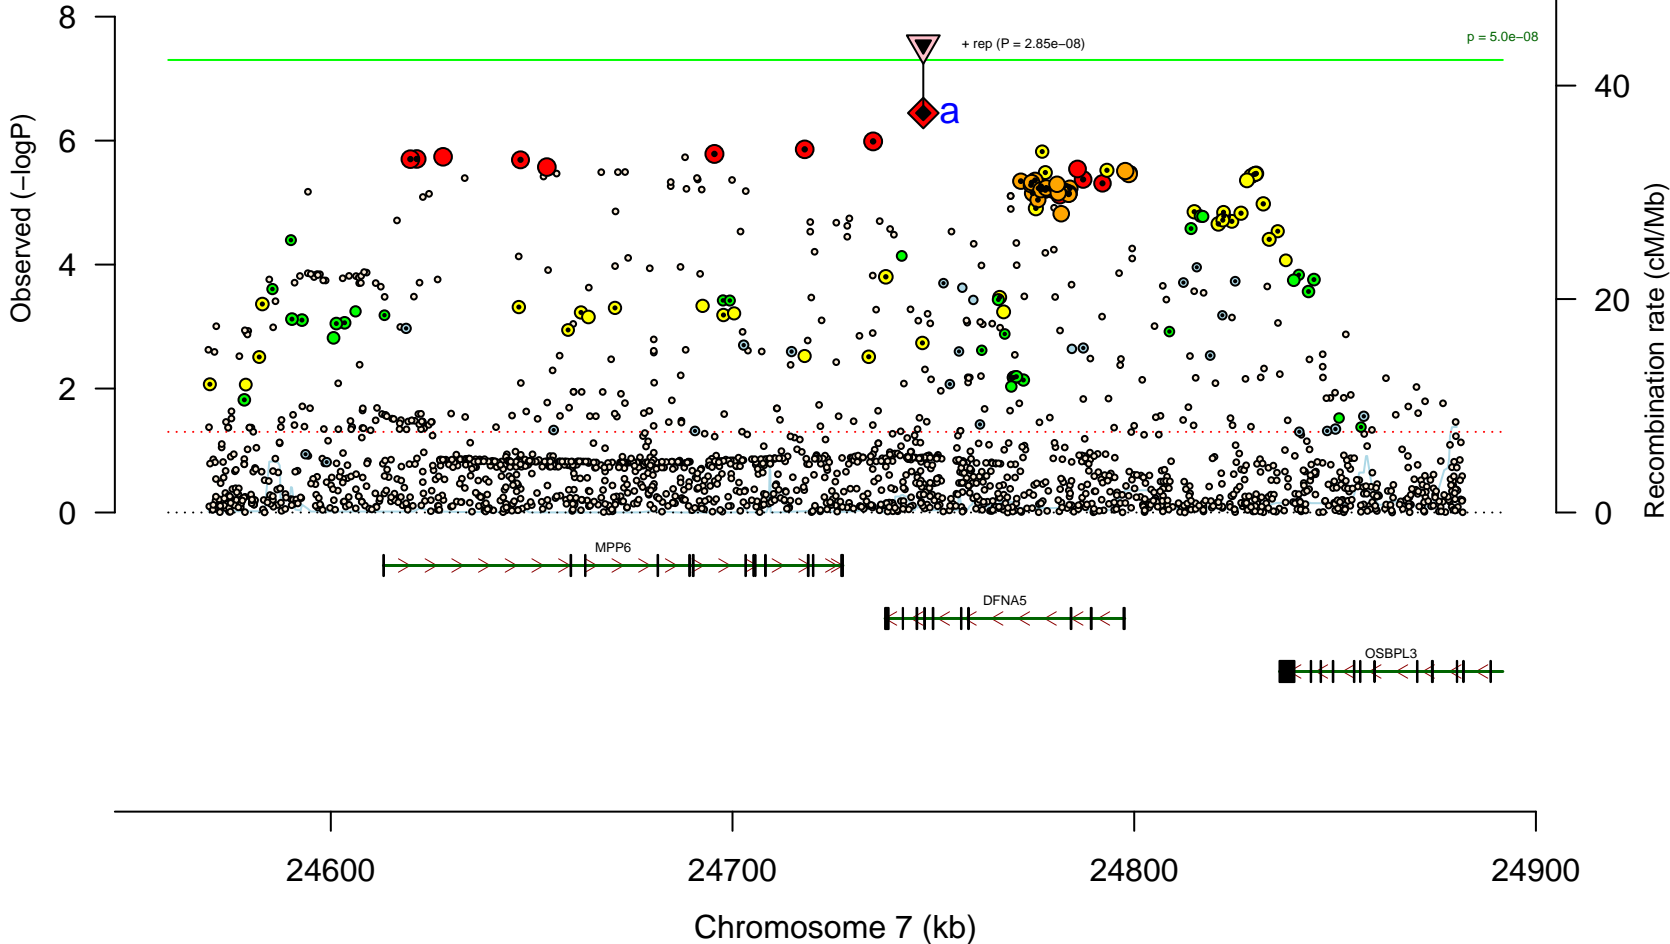

# PGC\_SCZ52.reg94

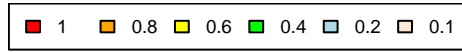

snp / p / or / maf / info / directions  
a . rs4388249 / 1.02e-07 / 1.07 / 0.21 / 0.992 / 37-15-0

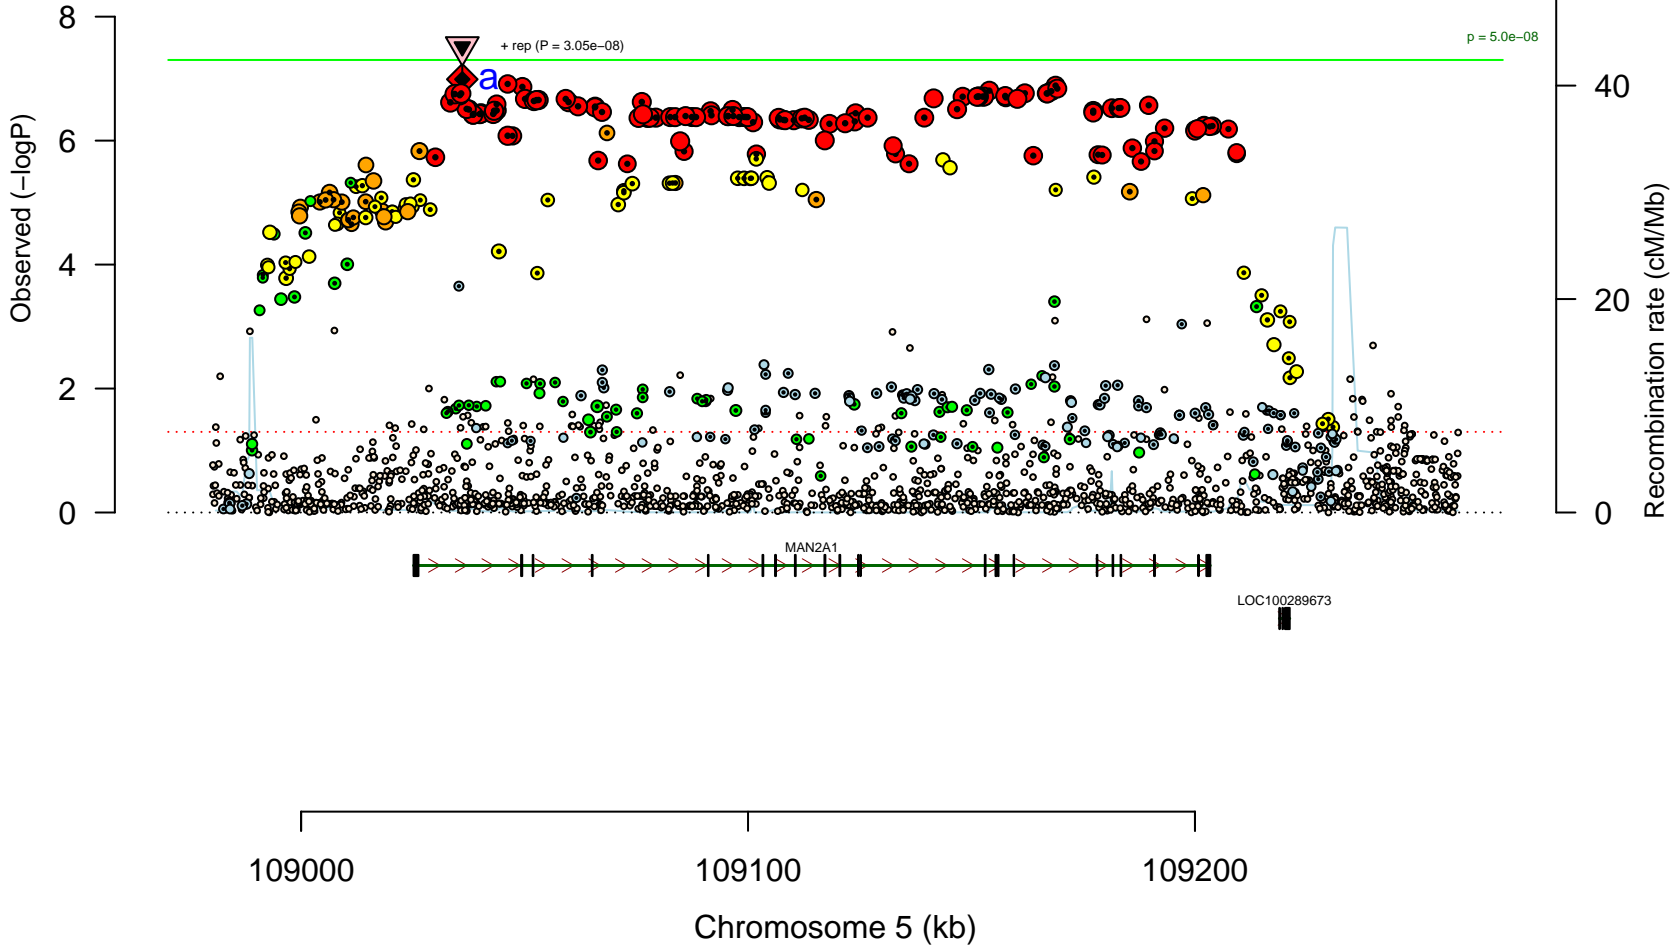

# PGC\_SCZ52.reg95

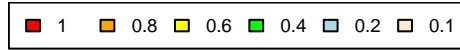

snp / p / or / maf / info / directions  
a . rs215411 / 1.22e-08 / 1.07 / 0.31 / 0.993 / 42-10-0

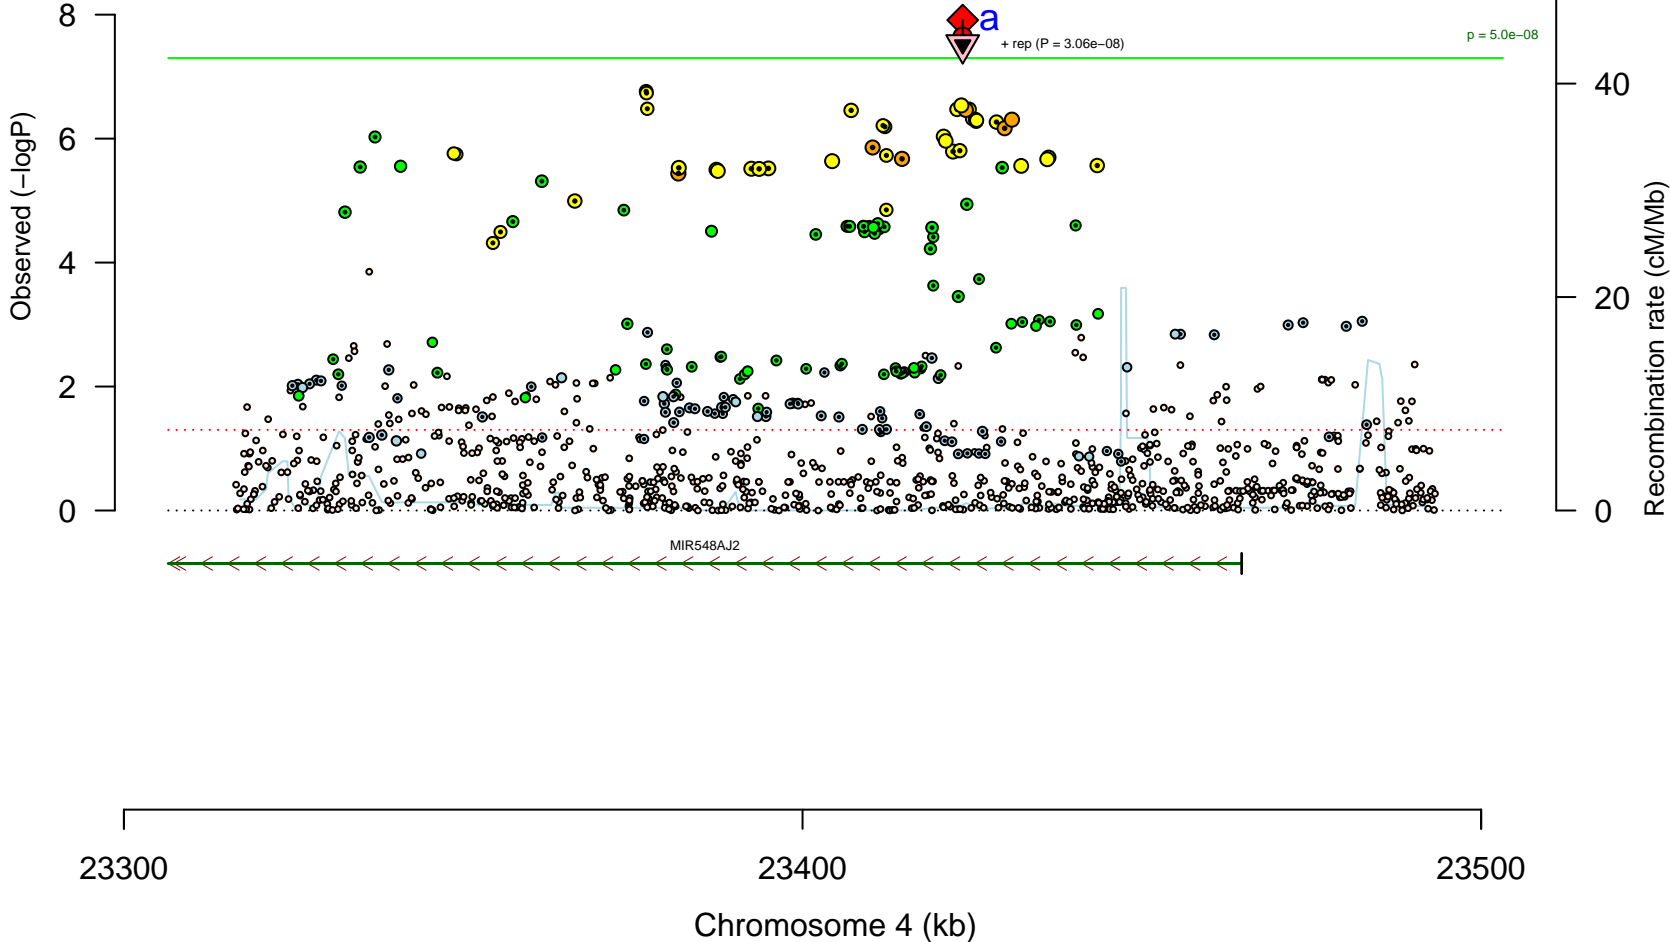

# PGC\_SCZ52.reg96



snp / p / or / maf / info / directions  
a . rs11740474 / 3.94e-08 / 1.06 / 0.38 / 0.97 / 14-38-0

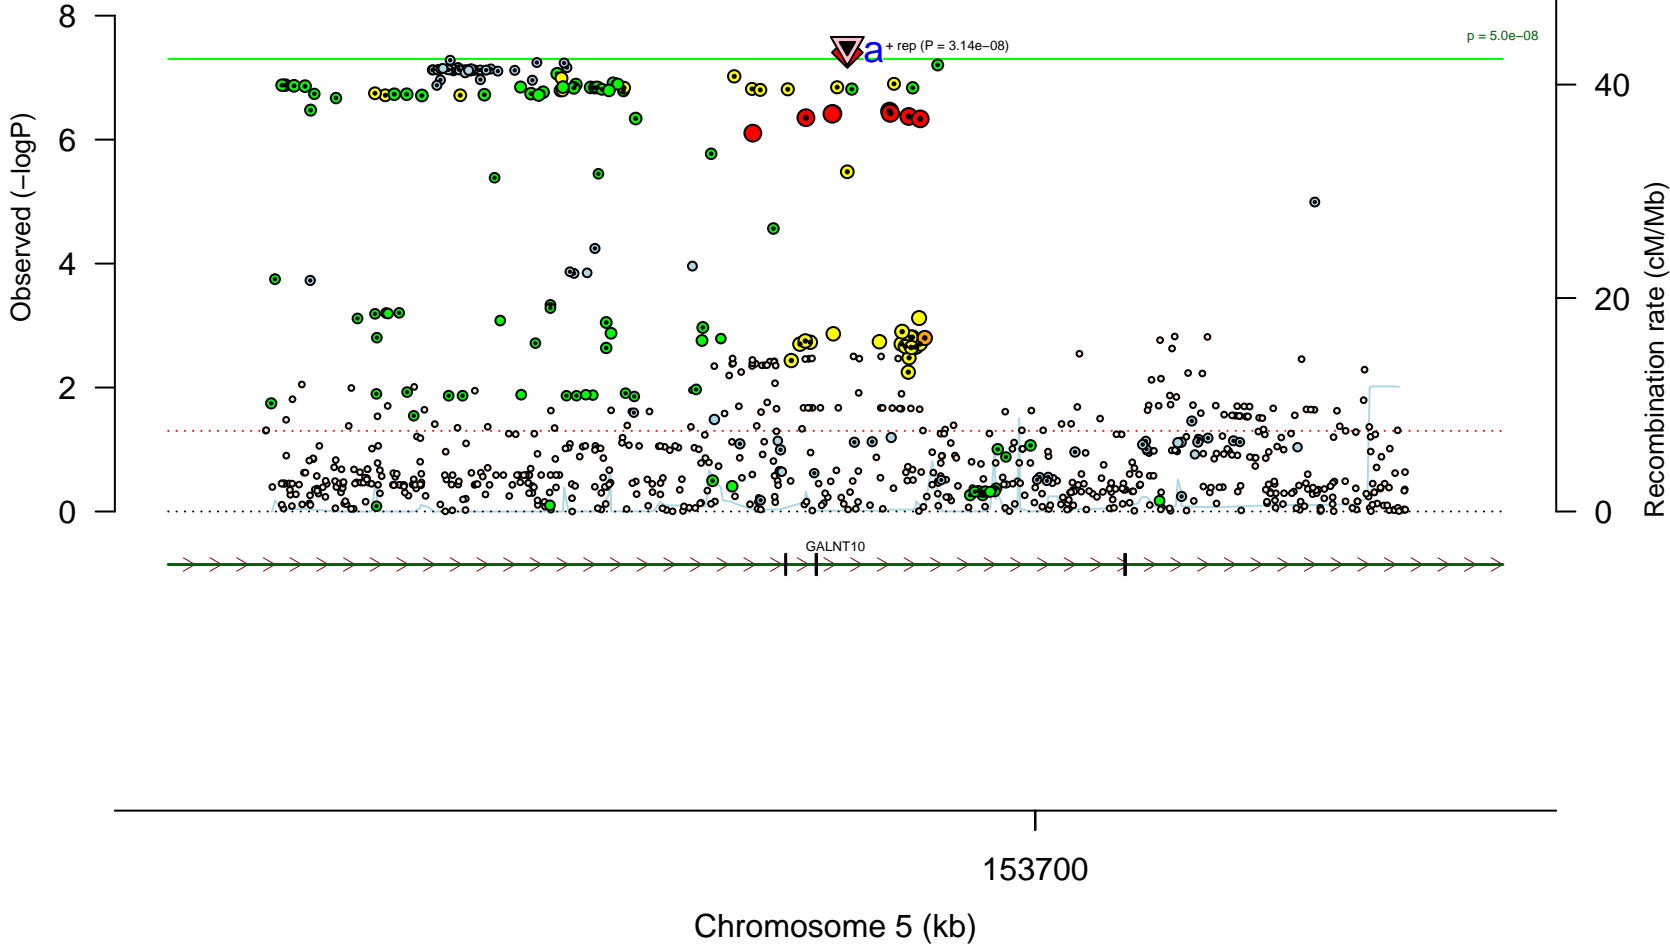



# PGC\_SCZ52.reg97

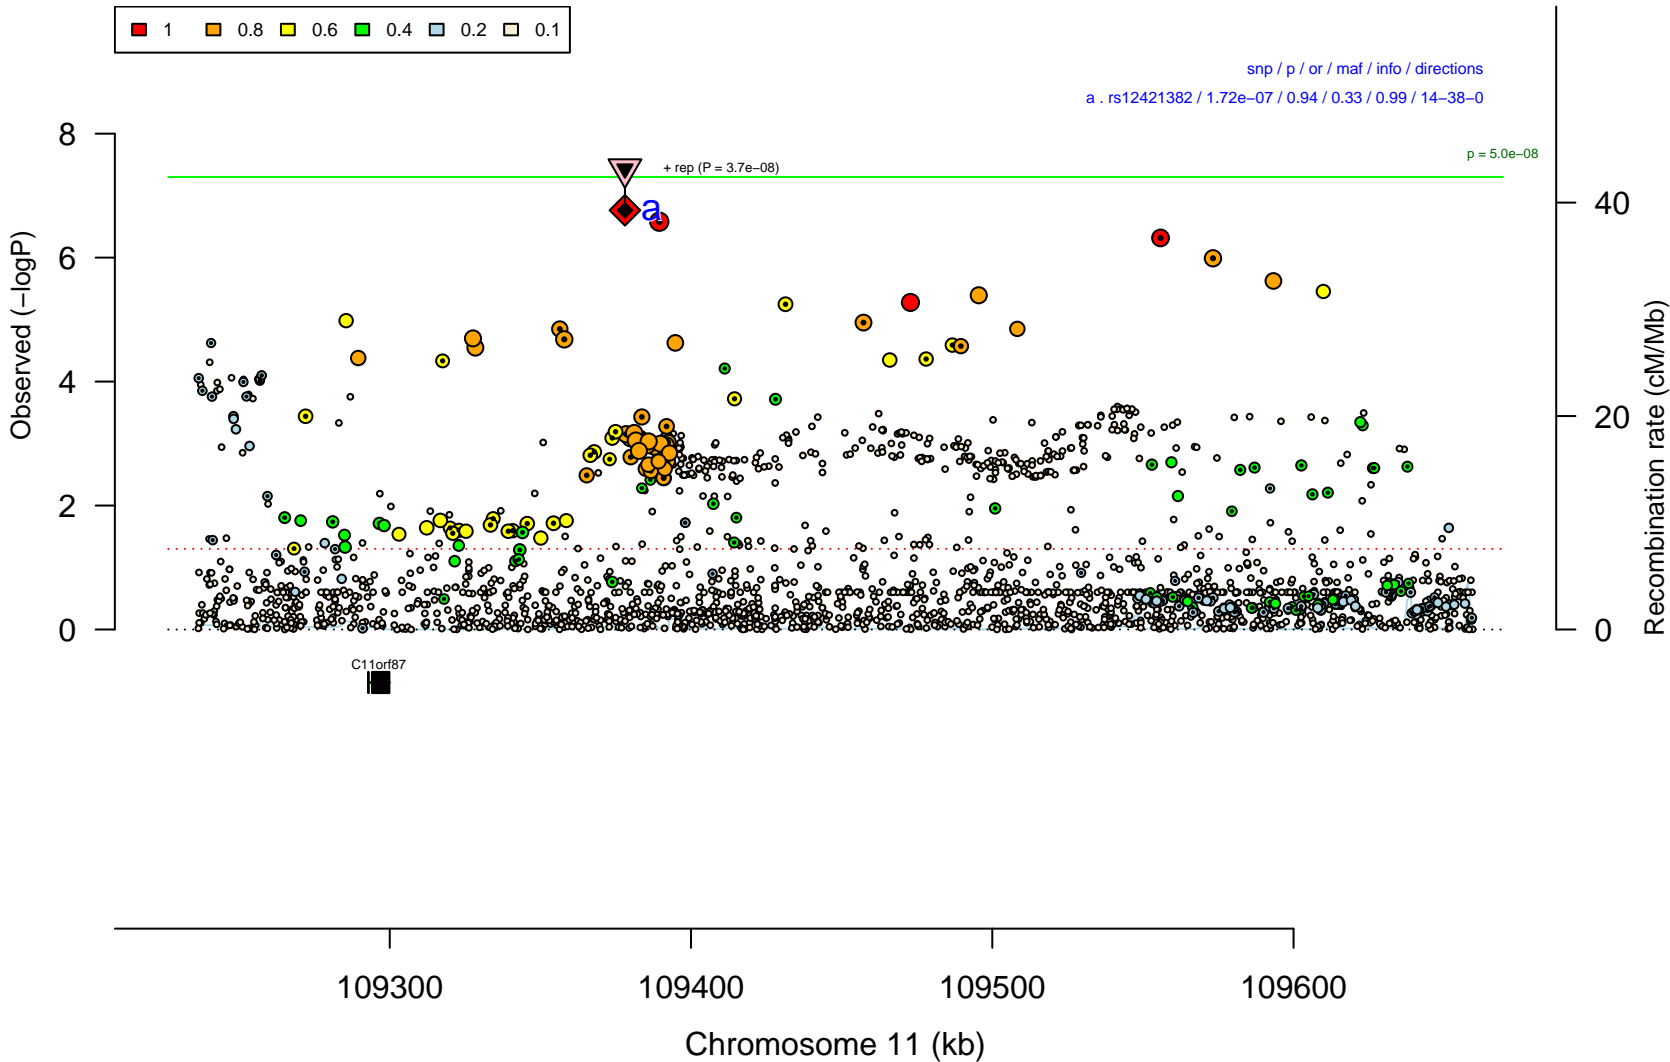

# PGC\_SCZ52.reg98

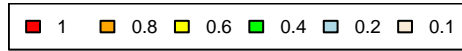

snp / p / or / maf / info / directions  
a . rs211829 / 5.47e-07 / 0.95 / 0.37 / 0.998 / 39-13-0

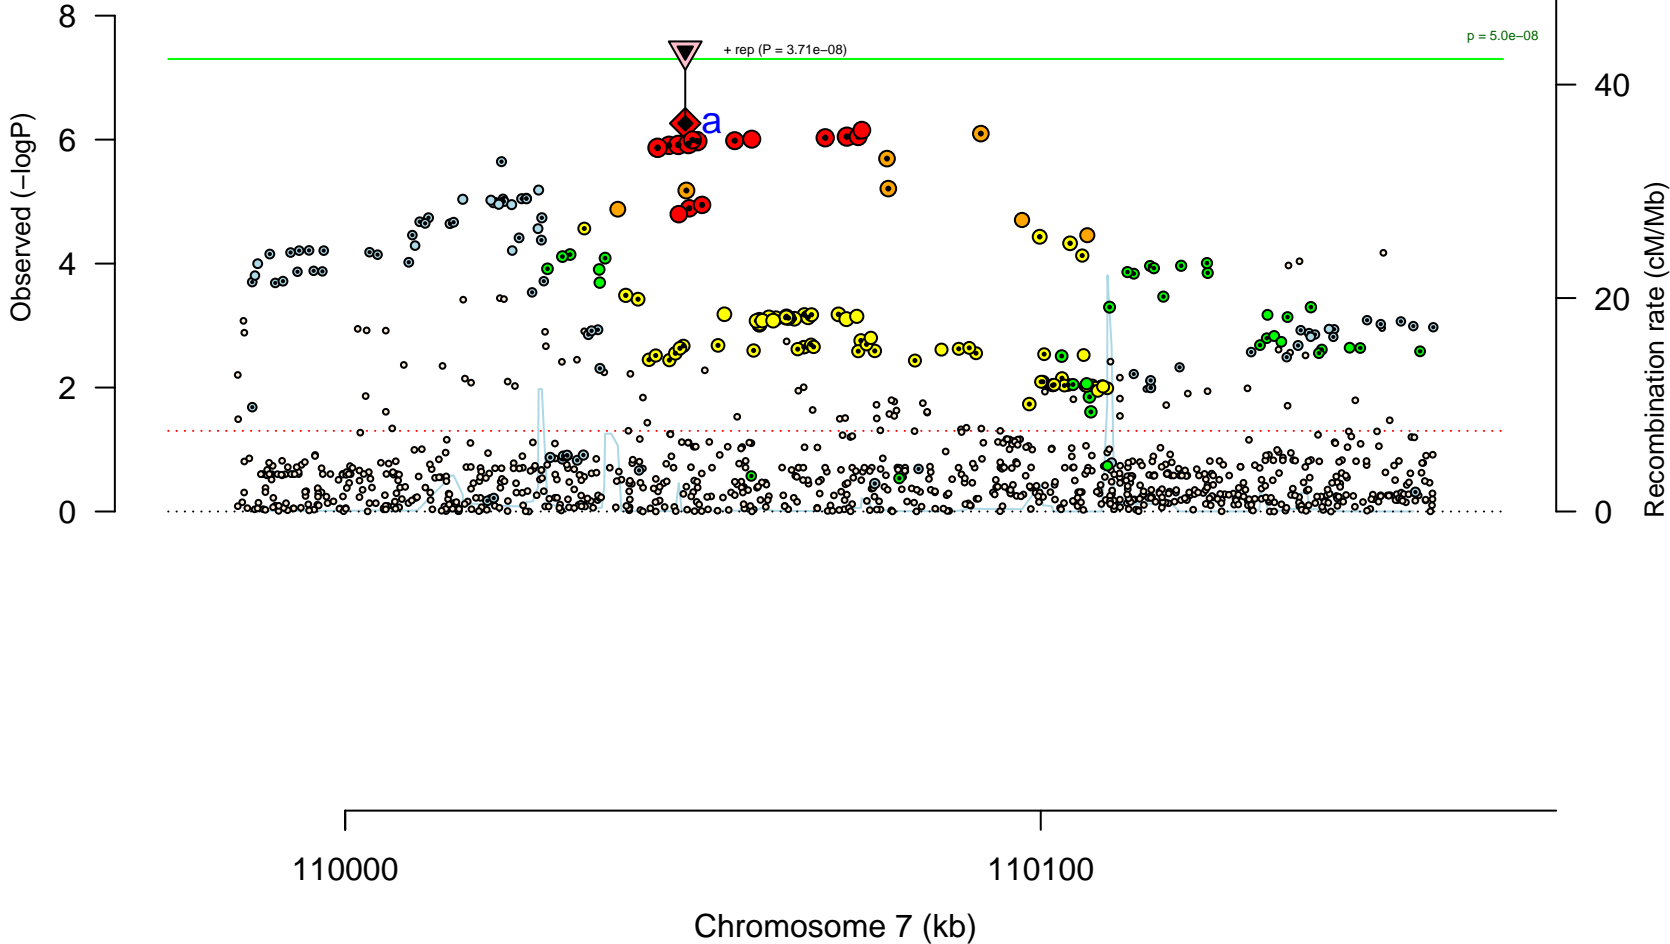

# PGC\_SCZ52.reg99

snp / p / or / maf / info / directions  
a . rs679087 / 7.06e-08 / 0.94 / 0.34 / 0.975 / 14-38-0

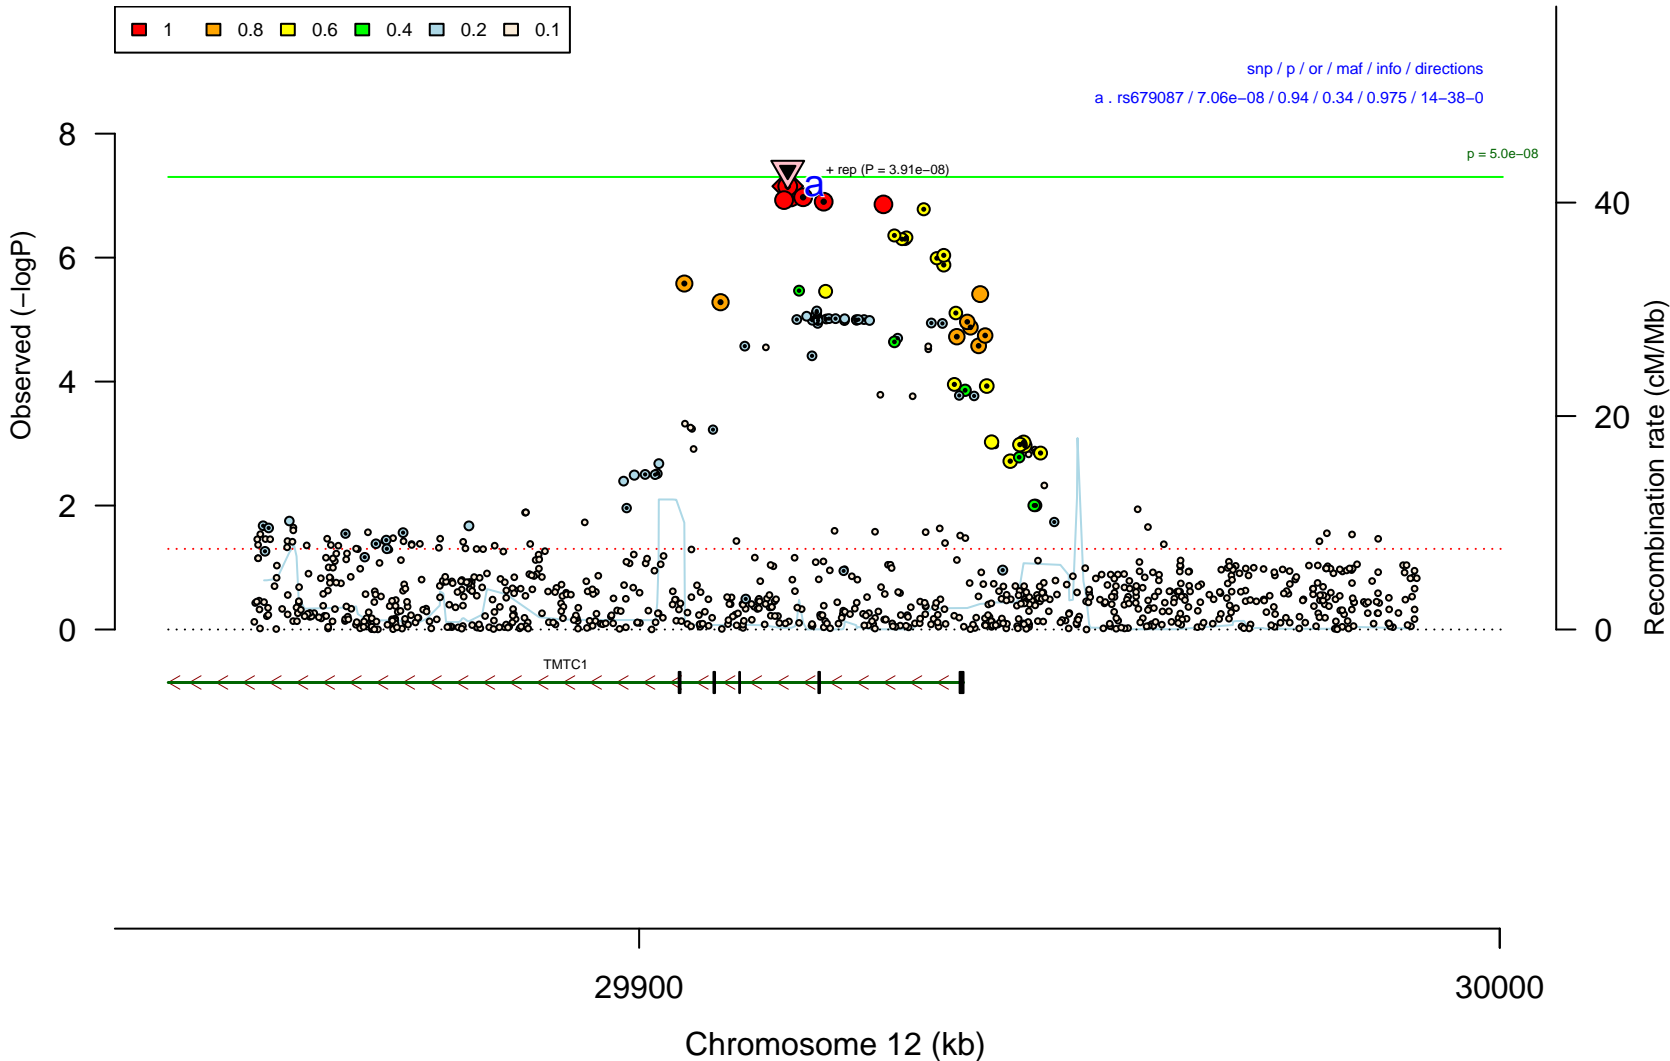

# PGC\_SCZ52.reg100

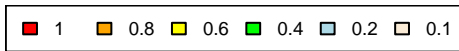

snp / p / or / maf / info / directions  
a . rs7801375 / 2.26e-08 / 0.92 / 0.15 / 0.991 / 11-41-0

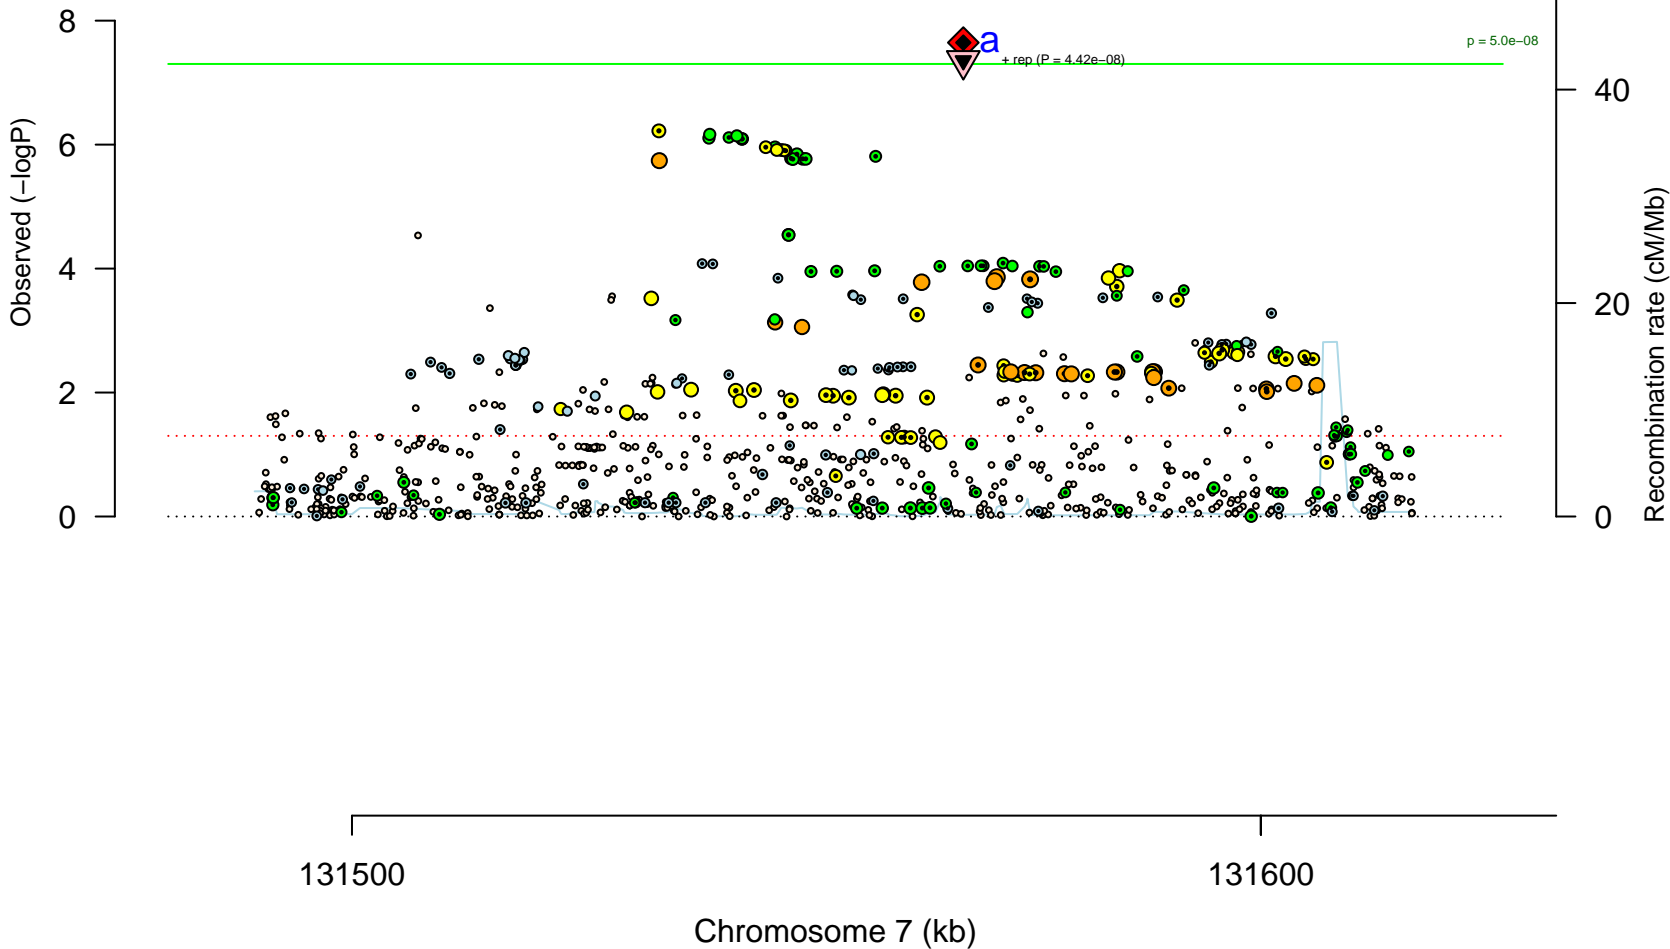

# PGC\_SCZ52.reg101

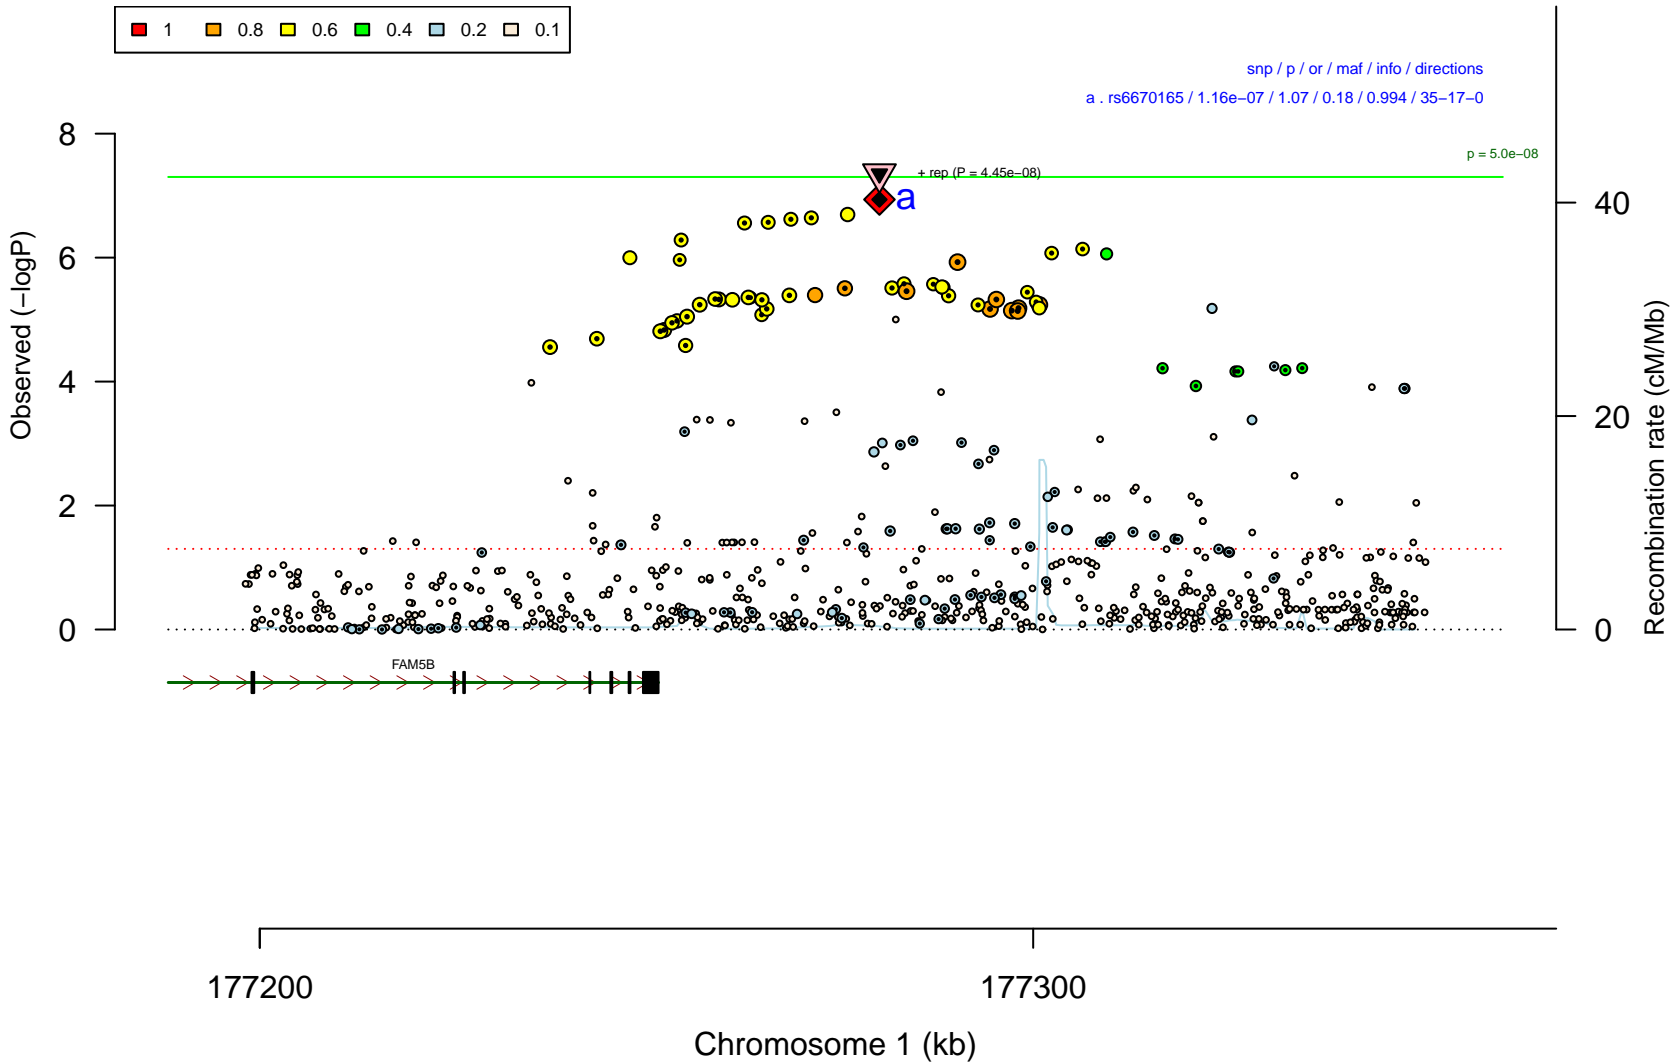

# PGC\_SCZ52.reg102

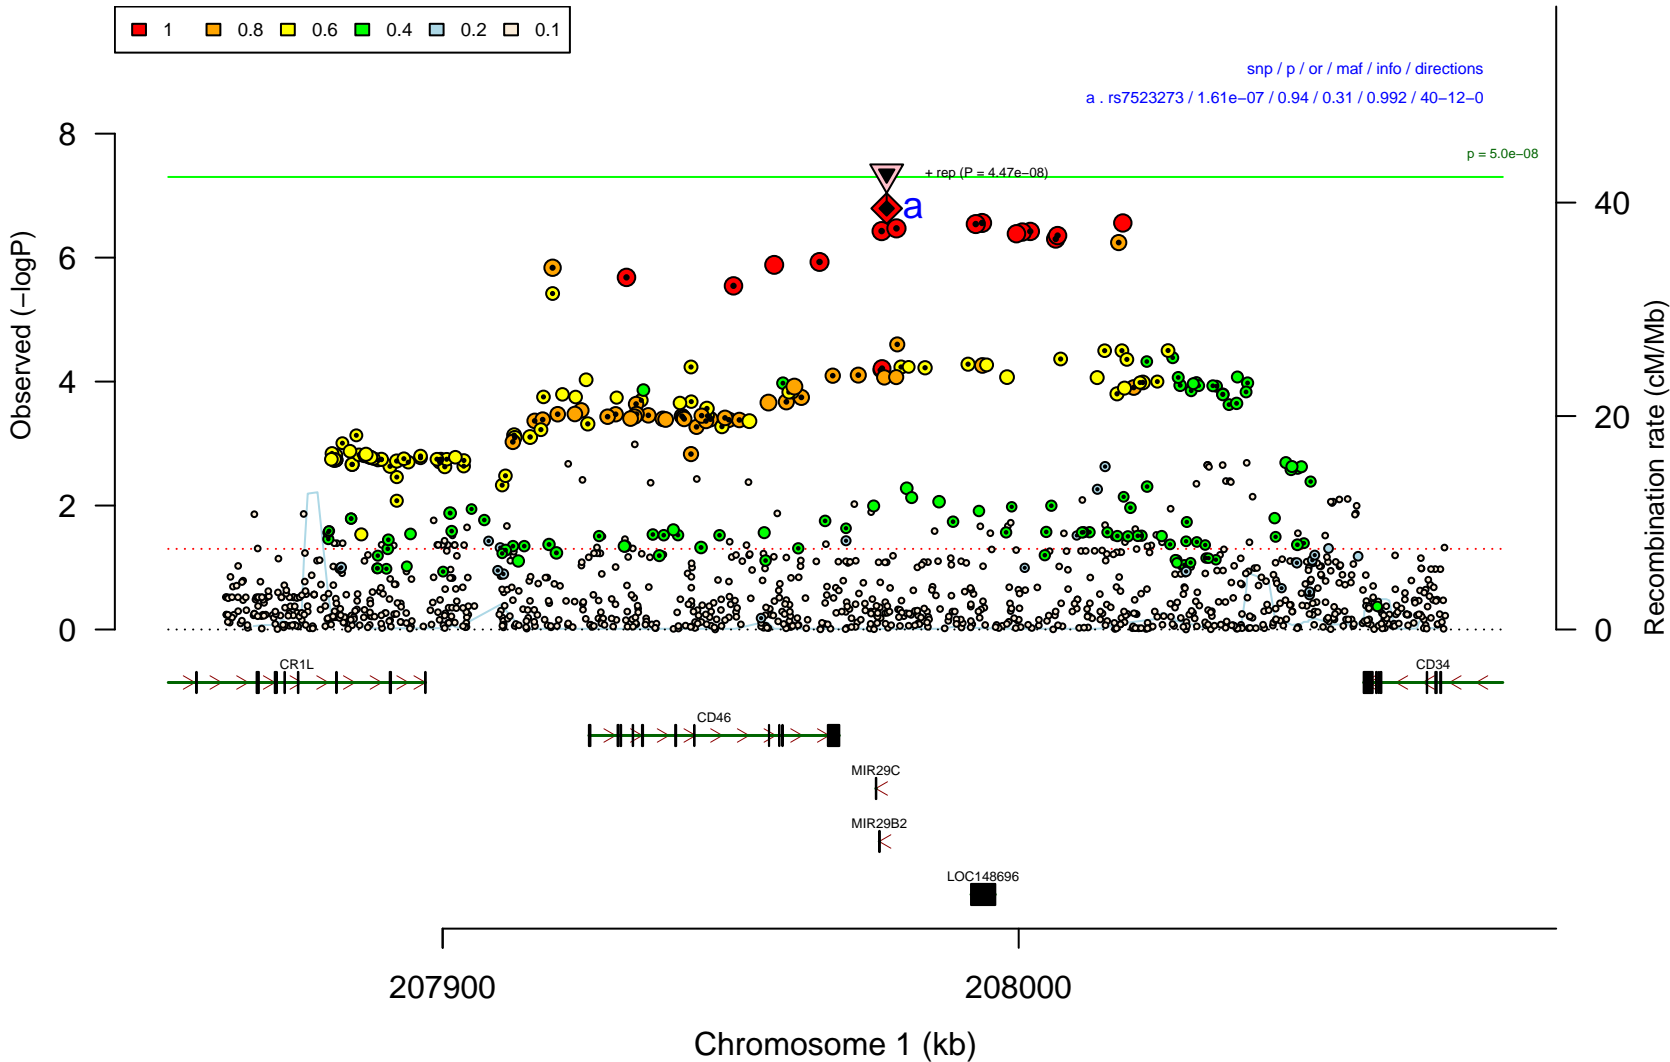

# PGC\_SCZ52.reg103

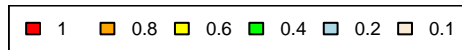

snp / p / or / maf / info / directions  
a . rs7267348 / 1.18e-07 / 1.07 / 0.25 / 0.993 / 18-34-0

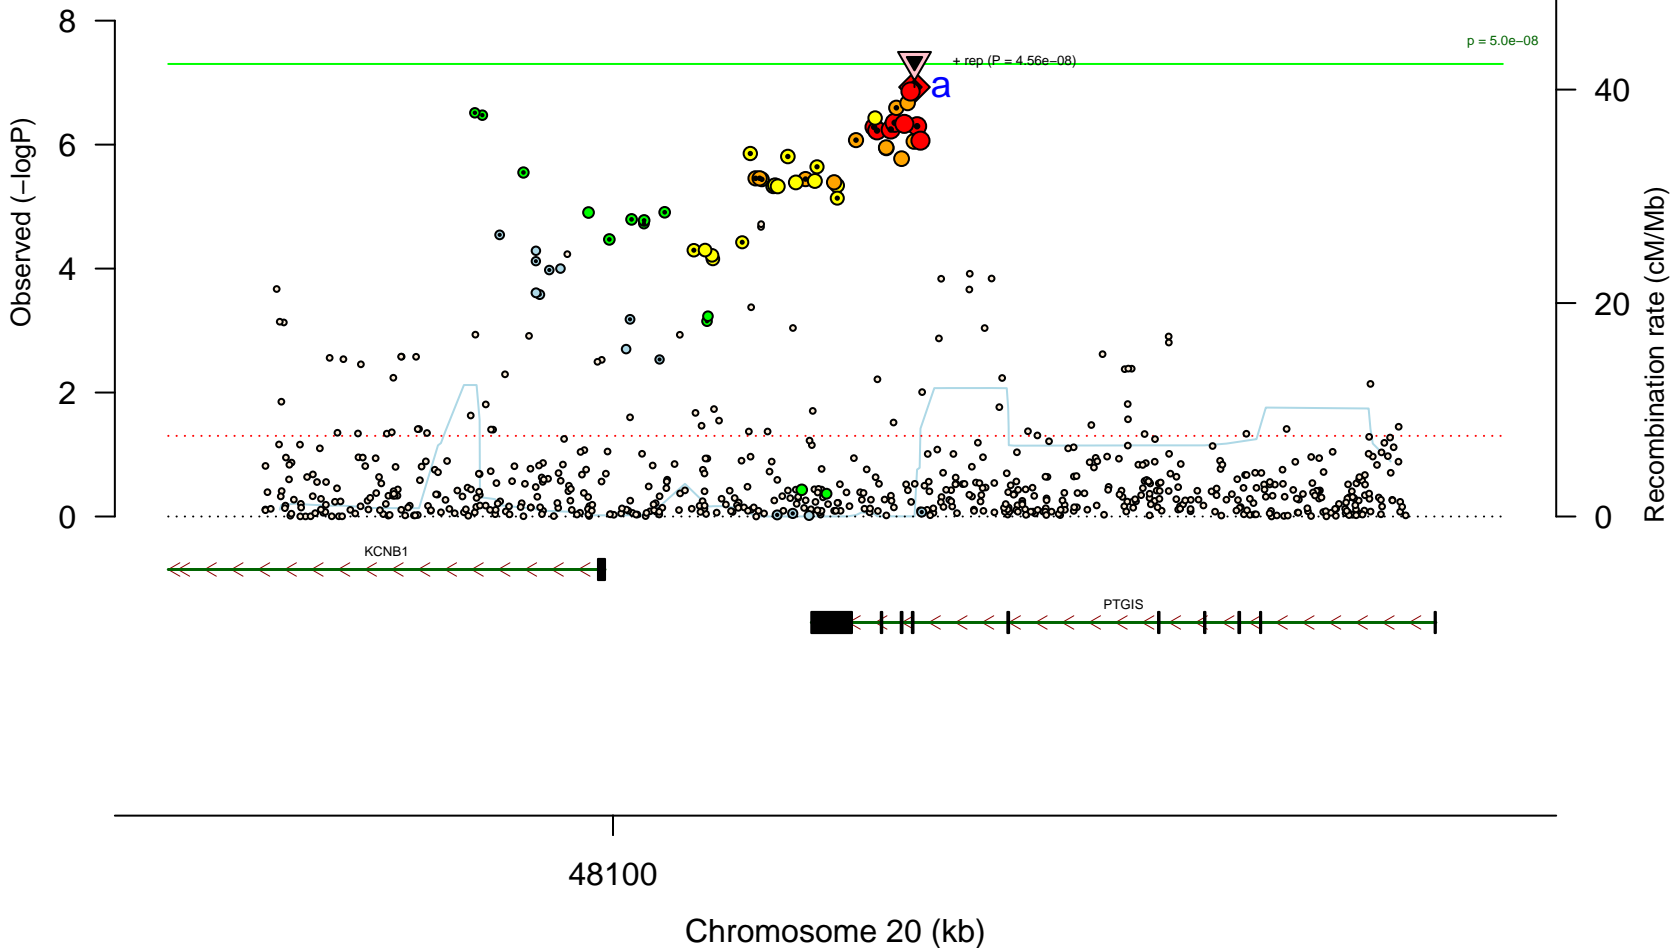

# PGC\_SCZ52.reg104

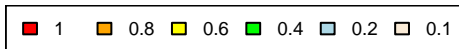

snp / p / or / maf / info / directions  
a . rs4240748 / 1.03e-07 / 0.94 / 0.37 / 0.979 / 13-39-0

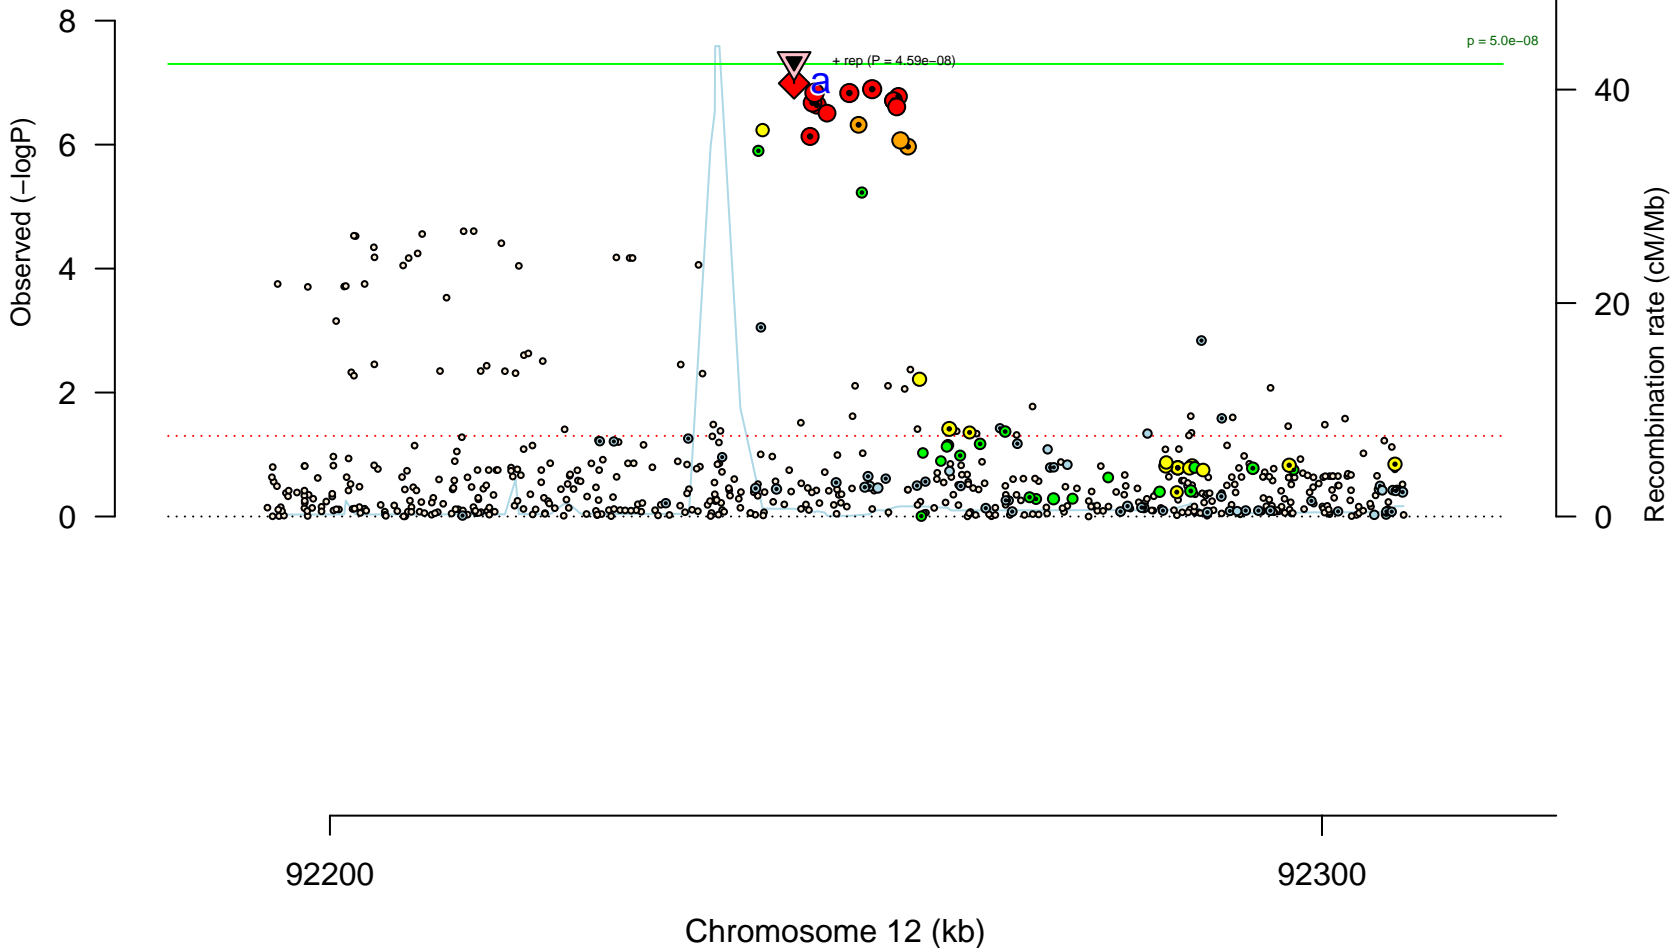



# PGC\_SCZ52.reg105

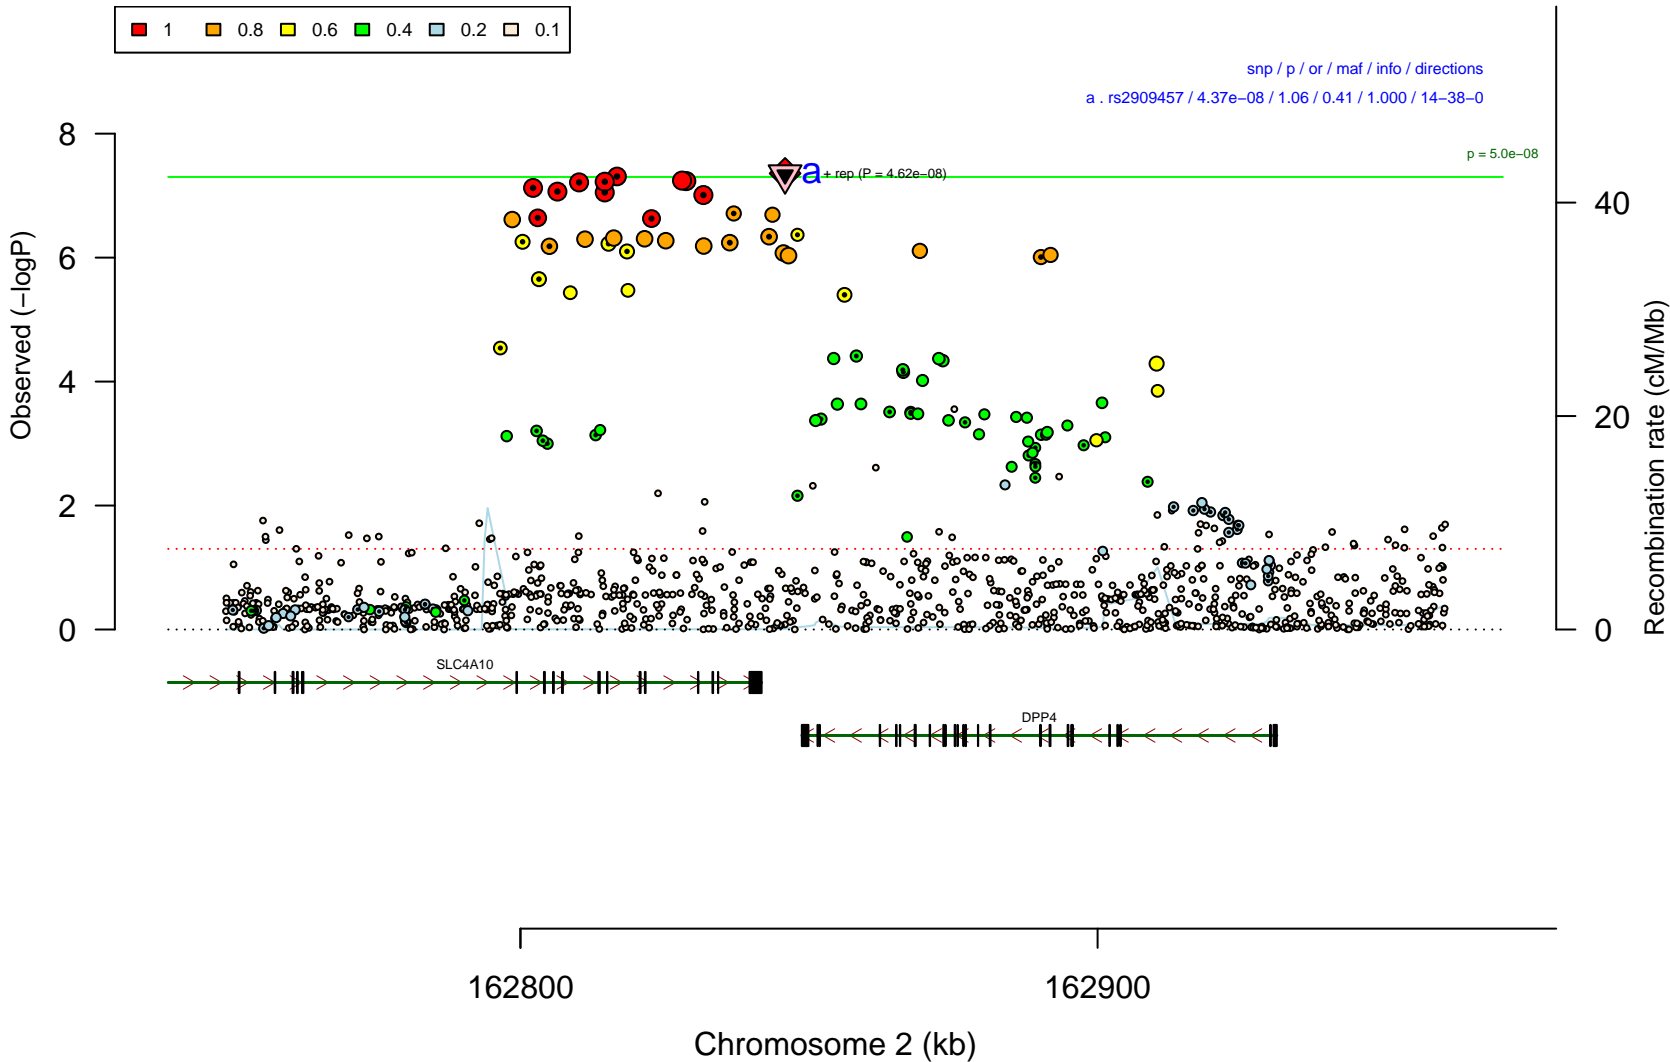

# PGC\_SCZ52.reg106

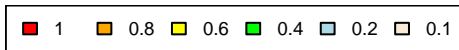

snp / p / or / maf / info / directions  
 a . rs56873913 / 2.19e-07 / 0.94 / 0.23 / 0.944 / 40-12-0

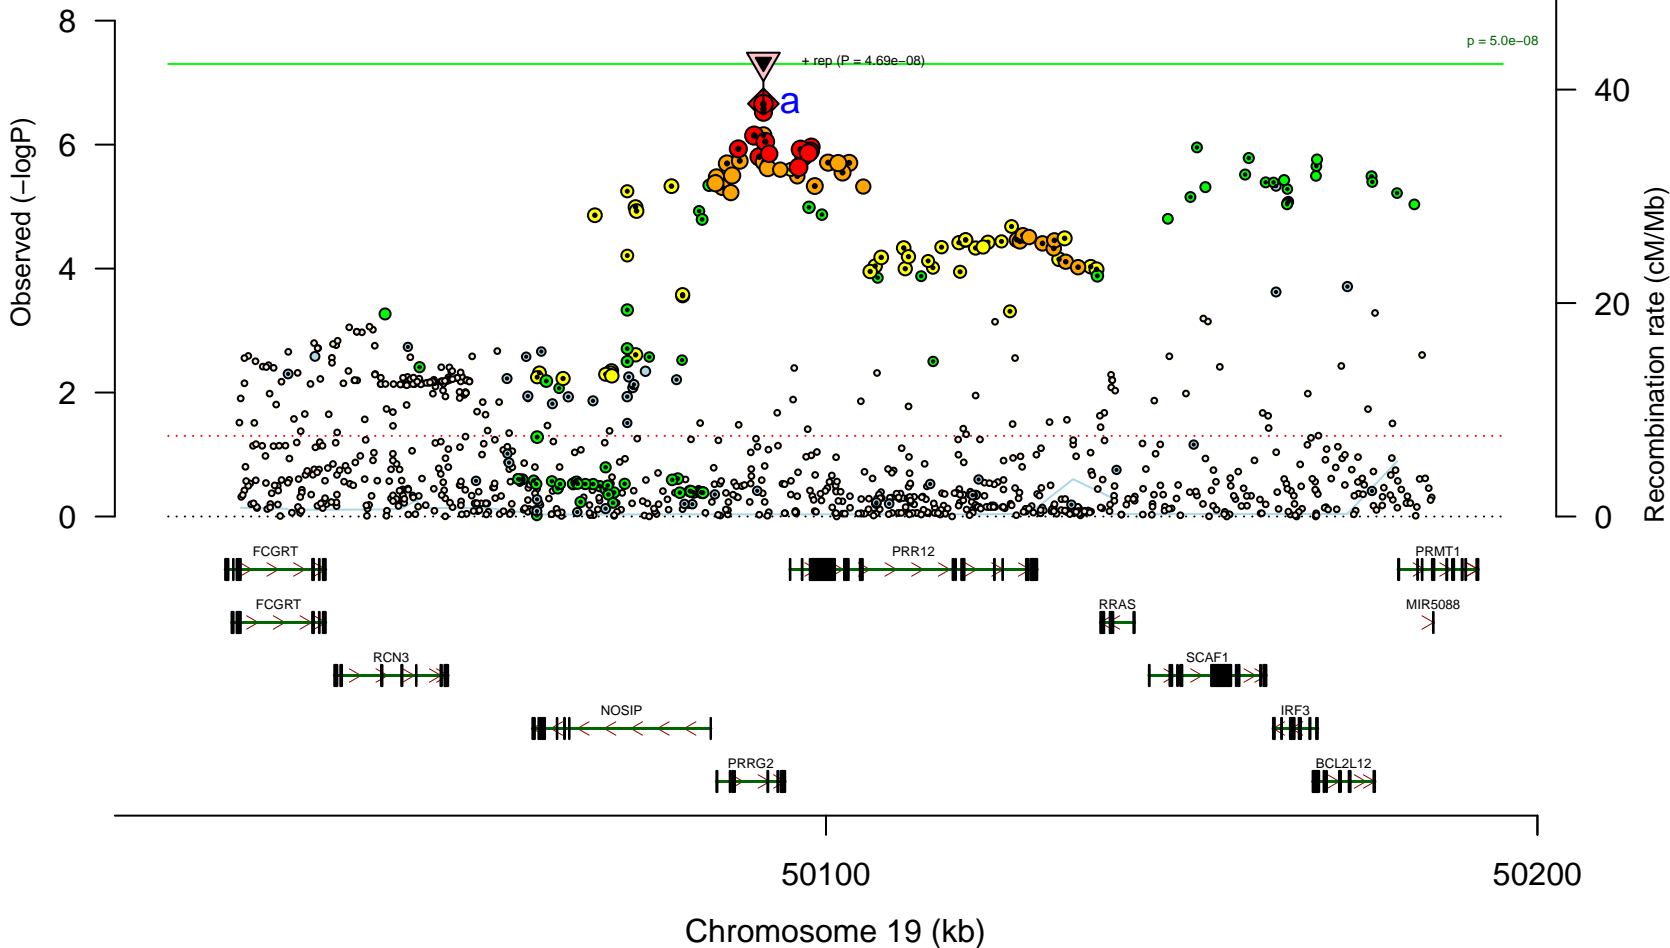

# PGC\_SCZ52.reg107

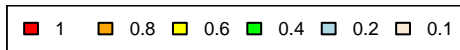

snp / p / or / maf / info / directions  
a . rs10860964 / 9.92e-08 / 0.94 / 0.35 / 1.000 / 41-11-0

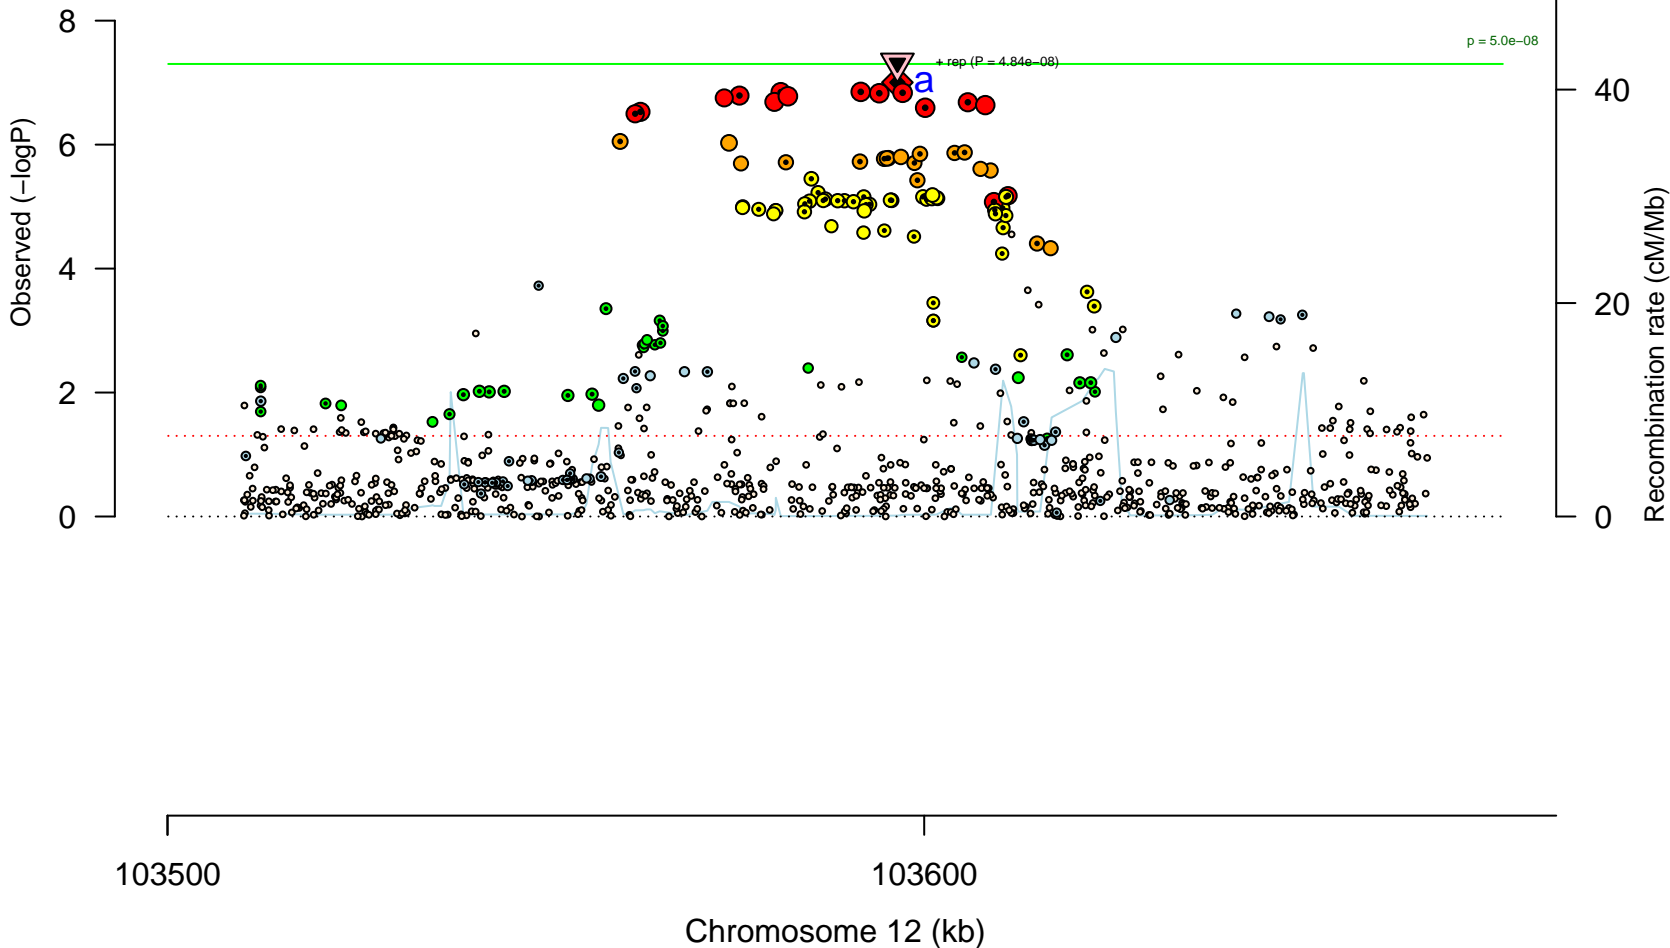

# PGC\_SCZ52.reg108



snp / p / or / maf / info / directions

a . chr5\_140143664\_I / 3.60e-07 / 1.05 / 0.47 / 1.000 / 13-39-0

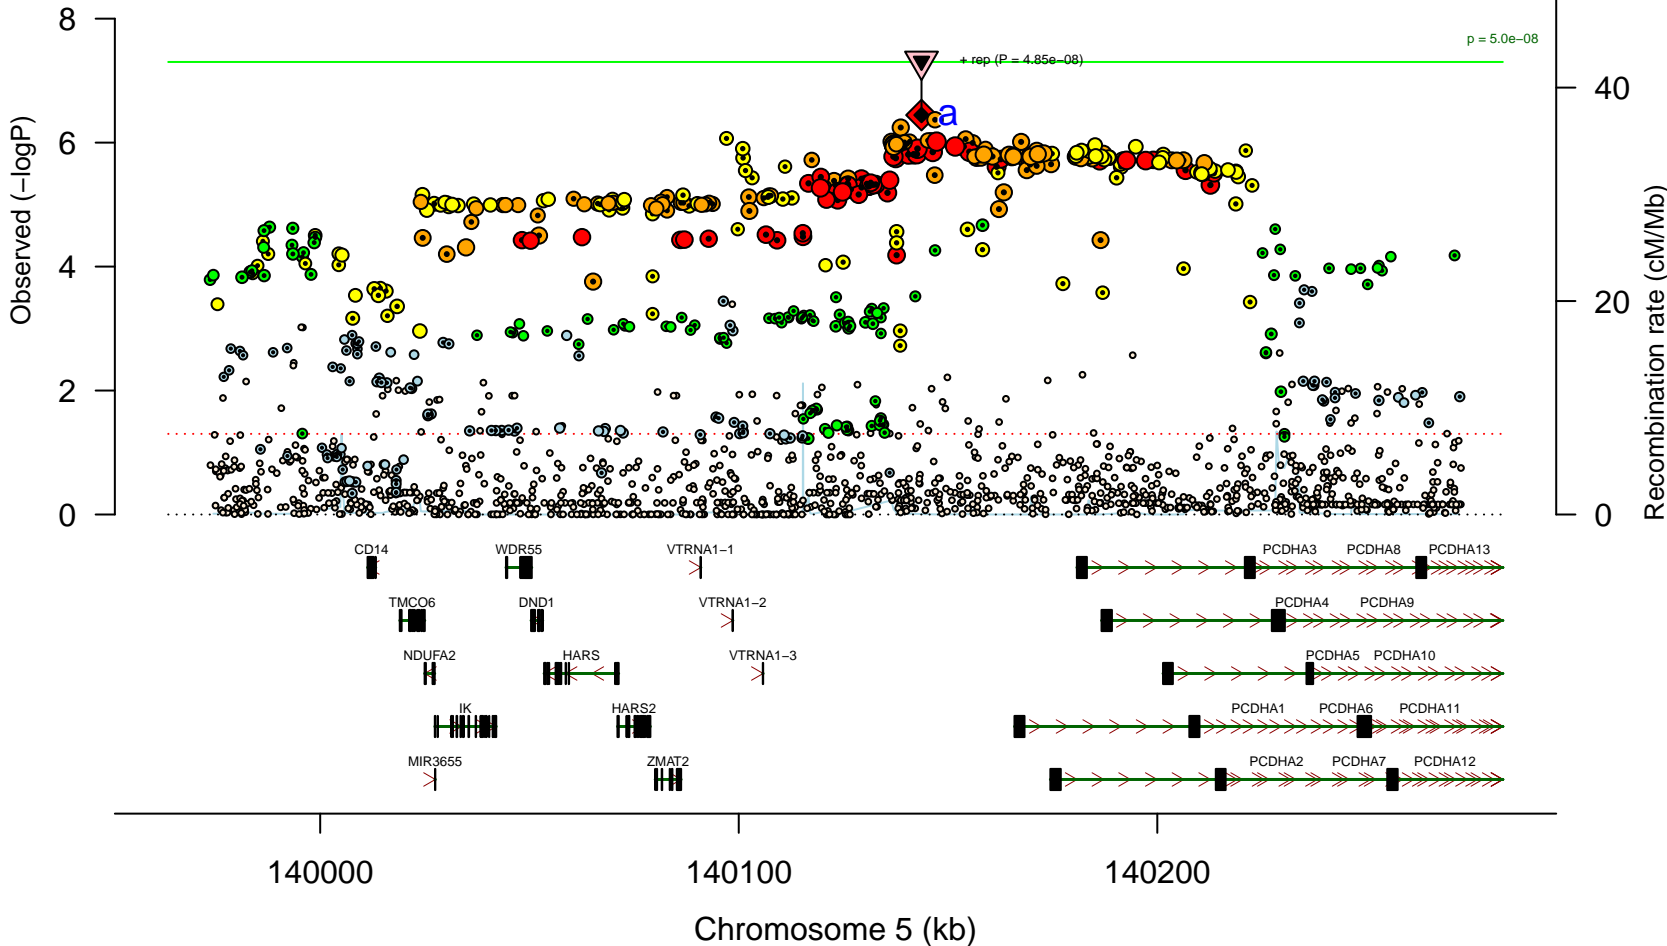

Supplement: NIHMS59304-supplement-Supplementary_Figure_1.pdf [file NIHMS59304-supplement-Supplementary_Figure_1.pdf]
